# Supplementary material for: Postpartum management of hypertensive disorders of pregnancy: a systematic review
Source: PubMed Central journal article supplement (PMC5719299; doi:10.1136/bmjopen-2017-018696), 2017-11-28
Supplement: bmjopen-2017-018696.draft_revisions.pdf [file bmjopen-2017-018696.draft_revisions.pdf]

# BMJ Open

BMJ Open is committed to open peer review. As part of this commitment we make the peer review history of every article we publish publicly available.

**When an article is published we post the peer reviewers' comments and the authors' responses** online. We also post the versions of the paper that were used during peer review. These are the versions that the peer review comments apply to.

The versions of the paper that follow are the versions that were submitted during the peer review process. They are not the versions of record or the final published versions. They should not be cited or distributed as the published version of this manuscript.

BMJ Open is an open access journal and the full, final, typeset and author-corrected version of record of the manuscript is available on our site with no access controls, subscription charges or pay-per-view fees (<http://bmjopen.bmj.com>).

**If you have any questions on BMJ Open's open peer review process please email** [editorial.bmjopen@bmj.com](mailto:editorial.bmjopen@bmj.com)

# BMJ Open

## Postpartum management of hypertensive disorders of pregnancy: a systematic review

|                                 |                                                                                                                                                                                                                                                                                                                                                                                                                                                                                                                                                                                                                                                                                                                                                                                                      |
|---------------------------------|------------------------------------------------------------------------------------------------------------------------------------------------------------------------------------------------------------------------------------------------------------------------------------------------------------------------------------------------------------------------------------------------------------------------------------------------------------------------------------------------------------------------------------------------------------------------------------------------------------------------------------------------------------------------------------------------------------------------------------------------------------------------------------------------------|
| Journal:                        | <i>BMJ Open</i>                                                                                                                                                                                                                                                                                                                                                                                                                                                                                                                                                                                                                                                                                                                                                                                      |
| Manuscript ID                   | bmjopen-2017-018696                                                                                                                                                                                                                                                                                                                                                                                                                                                                                                                                                                                                                                                                                                                                                                                  |
| Article Type:                   | Research                                                                                                                                                                                                                                                                                                                                                                                                                                                                                                                                                                                                                                                                                                                                                                                             |
| Date Submitted by the Author:   | 14-Jul-2017                                                                                                                                                                                                                                                                                                                                                                                                                                                                                                                                                                                                                                                                                                                                                                                          |
| Complete List of Authors:       | Cairns, Alexandra; University of Oxford Medical Sciences Division, Nuffield Department of Primary Care Health Sciences<br>Pealing, Louise; University of Oxford Medical Sciences Division, Nuffield Department of Primary Care Health Sciences<br>Duffy, James; University of Oxford Medical Sciences Division, Nuffield Department of Primary Care Health Sciences<br>Roberts, Nia; University of Oxford, UK, Bodleian Health Care Libraries,<br>Tucker, Katherine; University of Oxford, Nuffield Department of Primary Care<br>Leeson, Paul; University of Oxford, Division of Cardiovascular Medicine<br>MacKillop, Lucy; Oxford University Hospitals NHS Trust, Nuffield Department of Obstetrics & Gynaecology<br>McManus, Richard; University of Oxford, Dept of Primary Care Health Sciences |
| <b>Primary Subject Heading</b>: | Obstetrics and gynaecology                                                                                                                                                                                                                                                                                                                                                                                                                                                                                                                                                                                                                                                                                                                                                                           |
| Secondary Subject Heading:      | Evidence based practice                                                                                                                                                                                                                                                                                                                                                                                                                                                                                                                                                                                                                                                                                                                                                                              |
| Keywords:                       | Preeclampsia, Gestational hypertension, Postpartum, Hypertensive disorders of pregnancy, Antihypertensive medication, Systematic review                                                                                                                                                                                                                                                                                                                                                                                                                                                                                                                                                                                                                                                              |
|                                 |                                                                                                                                                                                                                                                                                                                                                                                                                                                                                                                                                                                                                                                                                                                                                                                                      |

SCHOLARONE™  
Manuscripts

# 1 Postpartum management of hypertensive disorders of 2 pregnancy: a systematic review

3 Dr Alexandra E. Cairns MA Hons (Oxon) BMBCh MRCOG<sup>1</sup>, Dr Louise Pealing MA Hons (Cantab)  
4 MSc MBBS MRCP MRCGP<sup>1</sup>, Dr James M.N. Duffy MBChB MRes BSc (Hons) PG HCL<sup>1</sup>, Nia Roberts  
5 MSc Econ<sup>2</sup>, Dr Katherine L. Tucker PhD<sup>1</sup>, Professor Paul Leeson PhD MBBChir BSc (Hons) FRCP<sup>3</sup>,  
6 Dr Lucy H. Mackillop MA (Oxon) BMBCh FRCP<sup>4</sup>, Professor Richard J. McManus PhD MA MBBS  
7 FRCGP FRCP<sup>1</sup>

8 <sup>1</sup> Nuffield Department of Primary Care Health Sciences, University of Oxford, Oxford, United  
9 Kingdom.

10 <sup>2</sup> Knowledge Centre, Bodleian Libraries, University of Oxford, Oxford, United Kingdom.

11 <sup>3</sup> Cardiovascular Clinical Research Facility, Division of Cardiovascular Medicine, Radcliffe  
12 Department of Medicine, University of Oxford, Oxford, United Kingdom.

13 <sup>4</sup> Nuffield Department of Obstetrics and Gynaecology, University of Oxford, Oxford, United  
14 Kingdom.

15 **Corresponding author:** Dr Alexandra E. Cairns BMBCh MA Hons (Oxon) MRCOG

16 alexandra.cairns@phc.ox.ac.uk

17 +44 (0) 1865 617960

18 Nuffield Department of Primary Care Health Sciences, University of  
19 Oxford, Radcliffe Primary Care, Radcliffe Observatory Quarter,  
20 Woodstock Road, Oxford, OX2 6GG, United Kingdom.

21 **Short title:** Postnatal Hypertension Management

22 **Competing interests statement:** None of the authors has any conflicts of interest to declare.

## 23 **Abstract**

### 24 **Objectives**

25 Hypertensive disorders of pregnancy (HDP) affect one in ten pregnancies and often persist  
26 postpartum when complications can occur. We aimed to determine the effectiveness and  
27 safety of pharmacologic interventions, other interventions, and different care models for  
28 postpartum hypertension management.

### 29 **Design**

30 A systematic review was undertaken. Nine electronic databases, including Medline, were  
31 searched from inception to 16/03/2017. After duplicate removal, 4,561 records were  
32 screened. Two authors independently selected studies, extracted study characteristics and  
33 data, and assessed methodological quality.

### 34 **Setting**

35 Randomised controlled trials, case-control studies, and cohort studies from any country and  
36 healthcare setting.

### 37 **Participants**

38 Postnatal women with HDP.

### 39 **Interventions**

40 Therapeutic intervention for management of hypertension, compared with another  
41 intervention, placebo, or no intervention.

### 42 **Primary and secondary outcome measures**

43 Outcome data were collected for maternal mortality and severe morbidity; systolic, diastolic  
44 and mean arterial blood pressure (BP) control; and safety data. Secondary outcome data  
45 collected included the length of postnatal hospital stay and laboratory values.

### 46 **Results**

47 39 studies were included (n=2,901). Results were heterogeneous in terms of intervention,  
48 comparison and outcome requiring a narrative approach. There were insufficient data to  
49 recommend any single pharmacologic intervention. 18 studies reported calcium-channel  
50 blockers, vasodilators and beta-blockers lowered BP postpartum. 12 of these reported safety  
51 data. Limited data existed regarding management in the weeks following hospital discharge.  
52 Neither loop diuretics (three studies) nor corticosteroids (one study) produced clinical benefit.

1  
2  
3 53 Uterine curettage significantly reduced BP over the first 48 hours postpartum (range 6-  
4 54 13mmHg) compared to standard care (eight studies), with safety data only reported by 4/8  
5 55 studies.  
6  
7

## 8 56 **Conclusion**

9  
10 57 There was insufficient evidence to recommend a particular BP threshold, agent, or model of  
11 58 care but three classes of antihypertensive appeared variably effective. Further comparative  
12 59 research, including robust safety data, is required. Curettage reduced BP, but without  
13 60 adequate reporting of harms, so cannot currently be recommended.  
14  
15  
16  
17

## 18 61 **Strengths and limitations of this study**

- 19  
20  
21 62 • All types of intervention for the management of postpartum hypertension – medical,  
22 63 surgical and organisation of care – were eligible for inclusion in this review.  
23  
24 64 • Randomised controlled studies plus other experimental study designs (cohort studies,  
25 65 case-control studies and quasi-randomised studies) were included and no limitations  
26 66 were imposed in terms of language or publication date, resulting in a comprehensive  
27 67 review.  
28  
29 68 • This review highlights significant evidence gaps, demonstrating that further  
30 69 comparative research is required, particularly to clarify postpartum antihypertensive  
31 70 selection.  
32  
33 71 • Although 39 studies were included, the majority had a high risk of bias such that the  
34 72 evidence provided by this review is of low quality.  
35  
36 73 • The 39 studies reported a broad range of heterogeneous outcomes, limiting  
37 74 meaningful comparison.  
38  
39  
40  
41  
42  
43  
44  
45  
46

## 47 75 **Keywords**

48  
49 76 Preeclampsia, gestational hypertension, postpartum, hypertensive disorders of pregnancy,  
50 77 antihypertensive medication, systematic review  
51  
52

## 53 78 **Abbreviations**

54  
55 79 BP Blood pressure  
56  
57  
58  
59  
60

- 1  
2  
3 80 HDP Hypertensive disorders of pregnancy  
4  
5 81 MAP Mean arterial pressure  
6  
7  
8 82 NICE National Institute of Health and Care Excellence  
9  
10 83 RCT Randomised controlled trial  
11  
12  
13 84 SSRI Selective serotonin reuptake inhibitor  
14  
15  
16 85  
17  
18  
19  
20  
21  
22  
23  
24  
25  
26  
27  
28  
29  
30  
31  
32  
33  
34  
35  
36  
37  
38  
39  
40  
41  
42  
43  
44  
45  
46  
47  
48  
49  
50  
51  
52  
53  
54  
55  
56  
57  
58  
59  
60

## 86 **Introduction**

87 Hypertensive disorders of pregnancy (HDP) often persist following delivery,<sup>1</sup> and  
88 occasionally arise de novo postpartum.<sup>2</sup> In both scenarios adverse events can occur during  
89 this period. Approximately one-third of eclampsia occurs postpartum, nearly half beyond 48  
90 hours after childbirth.<sup>3-5</sup> Half of the women who sustain an intracerebral haemorrhage in  
91 association with preeclampsia do so following birth.<sup>6</sup> Women may enter the postnatal period  
92 requiring large doses of antihypertensive medication, but the majority will be treatment-free  
93 by three to six months.<sup>1 7</sup> This rapidly changing blood pressure (BP) poses a challenge in  
94 terms of appropriate antihypertensive selection and dose adjustment.

95 The National Institute for Health and Care Excellence (NICE) recommends frequent  
96 postnatal BP monitoring for women with both preeclampsia (every one to two days for two  
97 weeks) and gestational hypertension (at least once between day three and five).<sup>8</sup> The  
98 guideline stipulates thresholds for the increase or commencement ( $\geq 150/100$ mmHg) and the  
99 reduction or cessation (consider  $< 140/90$ mmHg and reduce  $< 130/80$ mmHg) of  
100 antihypertensive medication after birth. However, little detail is provided about frequency or  
101 proportion of dose reduction or how to manage multiple medications.<sup>8</sup> The American College  
102 of Obstetricians and Gynecologists recommend that BP be monitored in hospital (or with an  
103 equivalent level of outpatient surveillance) for 72 hours after birth, and checked again seven  
104 to ten days postpartum (sooner if a woman is symptomatic).<sup>9</sup> In line with NICE, they propose  
105 treating BP when  $\geq 150/100$ mmHg, but add this should be on two measures, four to six hours  
106 apart. They make no suggestion regarding BP thresholds for medication reduction, implying  
107 uncertainty about when to decrease or stop treatment.

108 A Cochrane review (search date January 2013) evaluated medical interventions for  
109 prevention and treatment of postnatal hypertension. This was limited to randomised  
110 controlled trials (RCTs) and included only nine studies.<sup>10</sup> Given the paucity of evidence  
111 available, we have undertaken an updated systematic review of the postpartum management  
112 of hypertension in women with HDP with a broader scope: including the full range of  
113 interventions studied, and incorporating cohort and case-control studies, alongside RCTs. Our  
114 specific questions were: [1] How should BP be monitored in women with HDP postpartum?  
115 [2] What BP thresholds should be used for antihypertensive treatment initiation, adjustment  
116 and cessation postpartum? [3] Which antihypertensive medication(s) should be used in

1  
2  
3 117 postpartum in women with HDP? [4] What are the benefits and harms of other therapeutic  
4 118 interventions for women with HDP postpartum?  
5  
6  
7

### 8 **Material and methods**

9  
10 120 A protocol, with explicitly defined objectives, study selection criteria, and approaches to  
11 121 assessing study quality, outcomes and statistical methods, was developed (Appendix S1).  
12 122 This was registered with PROSPERO: International Prospective Register of Systematic  
13 123 Reviews (CRD42015015527) and is available online  
14 124 ([http://www.crd.york.ac.uk/PROSPERO/display\\_record.asp?ID=CRD42015015527](http://www.crd.york.ac.uk/PROSPERO/display_record.asp?ID=CRD42015015527)). We  
15 125 followed the guidelines for meta-analyses and systematic reviews outlined by the Preferred  
16 126 Reporting Items for Systematic Reviews and Meta-Analyses (PRISMA) statement (Appendix  
17 127 S2).<sup>11</sup>  
18  
19  
20  
21  
22  
23

24 128 A systematic literature review was undertaken to capture evidence from human studies  
25 129 regarding postpartum hypertension management in women with HDP, without restriction by  
26 130 language or publication date (Appendix S1). We searched the following databases, from  
27 131 inception to 16/03/2017: Cochrane Database of Systematic Reviews (CDSR), Database of  
28 132 Abstracts of Reviews of Effects (DARE) and Cochrane Central Register of Controlled Trials  
29 133 (CENTRAL), Cumulative Index to Nursing and Allied Health Literature (CINAHL),  
30 134 Embase, Medline, PsycINFO, Science Citation Index, Science (Web of Science Core  
31 135 Collection), Social Science Citation Index & Conference Proceedings Citation Index. We  
32 136 hand-searched reference lists and contacted relevant experts for potentially relevant studies,  
33 137 which might have been missed by electronic searches.<sup>12</sup>  
34  
35  
36  
37  
38  
39  
40

41 138 We included RCTs, quasi-randomised studies, case-control studies, prospective and  
42 139 retrospective cohort studies, assessing interventions for hypertension management  
43 140 postpartum in women with HDP (gestational hypertension, pre-eclampsia, chronic  
44 141 hypertension and super-imposed pre-eclampsia). Consistent with guidance from Cochrane,  
45 142 conference abstracts were included.<sup>5</sup>  
46  
47  
48  
49

50 143 Two reviewers (AC/LP) independently screened the titles and abstracts, and then critically  
51 144 reviewed the full text of selected studies to assess eligibility. Discrepancies were resolved by  
52 145 discussion before independent extraction of relevant data by the two reviewers. For trials with  
53 146 multiple intervention arms, we extracted data from eligible comparison arms. Data were  
54  
55  
56  
57  
58  
59  
60



1  
2  
3 147 extracted for the primary and secondary outcomes outlined in Table 1. Due to the  
4 148 heterogeneous nature of these studies, a narrative synthesis was undertaken.

7 149 Two reviewers (AC/LP) independently assessed each trial's methodological quality using the  
8  
9 150 Cochrane Collaboration's tool for assessing the risk of bias in RCTs,<sup>13</sup> and the Newcastle-  
10 151 Ottawa scale for case-control and cohort studies.<sup>14</sup> A global assessment of bias across trials  
11  
12 152 was made.

## 153 **Results**

154 Our searches yielded 7,105 records and after excluding duplicates, 4,561 titles and abstracts  
155 were screened (Figure 1). 80 full-text articles were assessed: 35 articles were excluded  
156 (Appendix S3). 45 articles, representing 39 studies (32 randomised trials, two prospective  
157 cohort studies, and five retrospective cohort studies) reporting data from 2,901 postnatal  
158 participants met our inclusion criteria (Appendix S4). 9/39 (23%) were published only as  
159 conference abstracts. No further details were made available following author contact.

160 A range of interventions was assessed including antihypertensive medications (18 studies,  
161 n=982), loop diuretics (four studies, n=503), parenteral steroids (one study, n=157), other  
162 medications (six studies, n=188), uterine curettage (eight studies, n=837) and novel models of  
163 care (two studies, n=234). 9/39 (23%) included  $\geq 100$  participants, and only two studies  
164 included  $\geq 200$  participants.<sup>15 16</sup> Four were from lower-middle-income settings<sup>15 17-19</sup>  
165 (classified according to the United Nations<sup>20</sup>), and 13/39 (33%) studies had follow-up periods  
166 longer than seven days (Appendix S4). Only 5/39 (13%) and 7/39 (18%) studies,  
167 respectively, reported maternal mortality or major maternal morbidity, and whilst the  
168 majority of studies did report some measure of BP control, three did not (Tables 2a&b).  
169 19/39 (49%) studies reported safety data (Tables 2a&b).

170 5/39 (13%) studies (all evaluating antihypertensive medications) involved mixed antenatal  
171 and postnatal populations<sup>17 21-24</sup>. Authors were contacted to request their dataset for the  
172 postnatal participants, but no data were made available. 6/39 (15%) studies included  
173 participants with chronic hypertension alongside women with de novo HDP (gestational  
174 hypertension or pre-eclampsia).<sup>22 23 25-31</sup> 12/39 (31%) studies included women with eclampsia  
175 – in one all participants were eclamptic (Appendix S5).<sup>17</sup>

176 30/32 (94%) included RCTs were judged to be at high overall risk of bias, by both reviewers,  
177 according to the Cochrane tool, 23/32 (72%) for multiple domains. Only 2/32 (6%) were

1  
2  
3 178 thought to be clearly at low risk of bias.<sup>29-32</sup> All included cohort studies were deemed to have  
4 179 a high risk of bias in at least one domain of the Newcastle-Ottawa scale (Appendix S6).

7 180 **How should blood pressure be monitored postpartum in women with hypertensive**  
8 181 **disorders of pregnancy?**

10 182 No studies specifically addressed the frequency or method of postnatal BP monitoring. Two  
11 183 evaluated the impact of postpartum care organisation (n=234), using the postnatal  
12 184 readmission rate as their primary outcome (Appendix S4). Neither reported maternal  
13 185 mortality or morbidity, safety data nor any measure of BP control (Table 2b).<sup>26 33</sup>

17 186 One assessed introduction of a specialised postpartum clinic (no further details were given)  
18 187 and demonstrated an increased postnatal readmission and triage visit rate (22% intervention  
19 188 group, 9% control group: difference 13%,  $p<0.04$ ) although 86% occurred before a  
20 189 participant was seen in the clinic.<sup>33</sup> The second study evaluated specialist nurse follow-up,  
21 190 including home visits and telephone contact, and reported no significant difference in the  
22 191 postnatal readmission rate compared to standard care.<sup>26</sup>

28 192 **What blood pressure thresholds should be used for antihypertensive treatment**  
29 193 **initiation, adjustment and cessation postpartum?**

30 194 No relevant studies identified.

34 195 **Which antihypertensive medication(s) should be used postpartum in women with**  
35 196 **hypertensive disorders of pregnancy?**

37 197 14 randomised trials (n=645), one quasi-randomised trial (n=15), and three retrospective  
38 198 cohort studies (n=322) evaluated antihypertensive medications (Appendix S4). Only three  
39 199 studies reported maternal mortality,<sup>29-31 34 35</sup> and three reported maternal morbidity: no  
40 200 differences between groups were reported (Table 2a).<sup>29-31 35 36</sup> 12 studies reported safety data,  
41 201 in comparisons between multiple classes of antihypertensive agents (Table 2a): no clear  
42 202 differences were established, although one study found a greater number of minor side effects  
43 203 reported with oral nifedipine than with oral labetalol.<sup>27 28</sup>

49 204 The vast majority of included studies evaluated either acute control of severe hypertension  
50 205 (7/18, 39%), or BP control in the few days after delivery, whilst women remained hospital  
51 206 inpatients (8/18, 44%). Only three studies, two published only as conference abstracts,  
52 207 evaluated BP control in the weeks and months following hospital discharge.<sup>25 27 28 37</sup>

### 208 **Calcium-channel blockers**

209 Three small studies examined oral nifedipine (n=135): nifedipine resulted in a greater  
210 decrease in MAP 18-24 hours after childbirth than placebo (intervention group  
211 93.9±1.6mmHg, control group 100.2±2.6mmHg, difference 6.3mmHg,  $p<0.05$ ), but not at  
212 other time points to 48 hours (one RCT, n=31).<sup>32</sup> Nifedipine controlled severe hypertension  
213 to <160/100mmHg more quickly than labetalol (intervention group 25.1±13.6 minutes,  
214 control group 43.6±25.4 minutes: difference 18.5 minutes,  $p=0.002$ ; one RCT, n=21).<sup>21</sup> A  
215 single RCT (n=83), reported no significant difference in time taken to control BP to  
216 <150/100mmHg when comparing nifedipine with methyldopa.<sup>34</sup>

### 217 **Vasodilators**

218 Six studies looked at the use of vasodilators (n=252). All utilised hydralazine via a range of  
219 administration routes. Bolus intravenous hydralazine controlled severe hypertension more  
220 quickly than continuous infusion (intervention group 65.23±23.38 minutes, control group  
221 186.36±79.77 minutes: difference -121.13 minutes,  $p<0.001$ ); one quasi-randomised study,  
222 n=15 (postnatal)).<sup>17</sup> Intramuscular hydralazine produced a more significant improvement in  
223 MAP at six hours than intravenous methyldopa (intervention group 104.5mmHg, control  
224 group 112mmHg: difference -7.5mmHg  $p=0.0057$ ) but not at other time points to 24 hours  
225 (one RCT, n=26).<sup>38 39</sup> There was no difference in BP control when comparing oral  
226 hydralazine with oral nifedipine (one RCT, n=38), or intravenous labetalol (one RCT,  
227 n=82).<sup>35 40</sup>

228 Bolus diazoxide was significantly more effective in achieving a target BP of  $\leq 140/90$ mmHg  
229 than intravenous hydralazine (intervention group 67%, control group 43%: RR 0.64, 95% CI  
230 0.46-0.89; one RCT, n=37 (postnatal)).<sup>23</sup> One retrospective cohort study did not present any  
231 statistical analysis.<sup>36</sup>

### 232 **Beta-blockers**

233 Five studies assessed the efficacy of beta-blockers (four RCTs and one retrospective cohort  
234 study, n=305). Two RCTs compared intravenous labetalol with intravenous  
235 hydralazine/dihydralazine: one involved only six postnatal women and presented no  
236 statistical analysis of the data.<sup>24</sup> The other found a significantly greater mean maximal  
237 decrease in MAP with intravenous labetalol (intervention group 25.5±11.2mmHg, control  
238 group 33.3±13.2mmHg: difference -7.8mmHg,  $p=0.02$ ; one RCT, n=32 (postnatal)).<sup>22</sup>  
239 Results conflicted regarding whether oral labetalol was more or less effective than oral

1  
2  
3 240 nifedipine: a cohort study reported that labetalol controlled BP less rapidly than nifedipine  
4 241 (intervention group 2.7 days, control group 1.7 days: difference 1.0 days,  $p=0.0031$ ; one  
5 242 retrospective cohort study,  $n=128$ ).<sup>41</sup> However, this result was not replicated by an RCT,  
6 243 where the time to BP control was similar in the two groups ( $n=50$ ).<sup>27 28</sup> Neither study  
7 244 demonstrated a difference in the postnatal length of stay ( $n=178$ ). Timolol was effective in  
8 245 decreasing diastolic BP on day one postnatal when compared with methyldopa (intervention  
9 246 group 88.7mmHg, control group 93.8mmHg: difference -5.1mmHg;  $p<0.05$ ; one RCT,  
10 247  $n=80$ ).<sup>42</sup>

### 17 248 *Other antihypertensive medications*

18 249 No statistically significant difference was found between oral clonidine and oral captopril in  
19 250 the incidence of episodes of severe hypertension postpartum (one RCT,  $n=90$ ).<sup>29-31</sup> Two  
20 251 RCTs evaluating indapamide versus methyldopa found no difference in BP control over 6-12  
21 252 months postpartum ( $n=60$ ).<sup>25 37</sup> One retrospective cohort study ( $n=140$ ) compared reserpine  
22 253 with phenobarbital: the results suggested that reserpine might achieve faster and greater BP  
23 254 reduction (data extracted from graphs; no statistical analysis). No adverse events were  
24 255 reported in the intervention group.<sup>43 44</sup>

### 31 256 **What are the benefits and harms of other therapeutic interventions for women with** 32 257 **hypertensive disorders of pregnancy postpartum?**

#### 35 258 *Loop Diuretics*

36 259 Four RCTs ( $n=503$ ) examined loop diuretics versus placebo or usual care in postpartum  
37 260 hypertension management in women with HDP. None reported maternal mortality or safety  
38 261 data. Only two reported major maternal morbidity, neither demonstrating a difference  
39 262 between groups (Table 2b).<sup>16 19</sup>

40 263 One RCT ( $n=120$ ) reported significant improvement in the primary outcome of mean systolic  
41 264 and diastolic BP with oral furosemide versus placebo (magnitude of difference or time points  
42 265 of measurements not stated,  $p<0.001$ ).<sup>45</sup> This was not the case in the other placebo-controlled  
43 266 RCT, which found no significant difference ( $n=19$ ).<sup>46</sup> Two further RCTs ( $n=364$ ) found no  
44 267 significant difference in BP control with oral furosemide versus usual care.<sup>16 19</sup> In one of  
45 268 these, subgroup analysis of women with severe preeclampsia ( $n=70$ ) found women who  
46 269 received oral furosemide had a significantly lower systolic BP day 2 postpartum (intervention  
47 270 group  $142\pm 13$ mmHg, control group  $153\pm 19$ mmHg: difference -11mmHg,  $p<0.004$ ), but not  
48 271 at other time points.<sup>16</sup> In the other trial ( $n=100$ ), furosemide reduced the need for additional

1  
2  
3 272 antihypertensive treatment during the three days of therapy (intervention group 8.0%, control  
4 273 group 26.0% difference 18%,  $p=0.017$ ), but this difference did not persist to hospital  
5 274 discharge.<sup>19</sup>

6  
7  
8  
9 275 **Other drugs**

10 276 Five RCTs, one quasi-randomised study and one retrospective cohort study investigated the  
11 277 utility of different drug classes in HDP postpartum (Appendix S5). Three studies reported  
12 278 safety data, but only one reported maternal mortality, demonstrating no difference between  
13 279 groups,<sup>47</sup> and none reported major maternal morbidity (Table 2b).

14  
15  
16  
17  
18 280 Three small, crossover RCTs examined the use of selective serotonin receptor inhibitors  
19 281 (SSRIs) compared with placebo (n=55). All studies showed a significant reduction in BP with  
20 282 SSRIs compared to placebo (range 25.6 – 34mmHg).<sup>48-50</sup> These data suggest efficacy for this  
21 283 drug class in hypertension management but do not provide any information regarding relative  
22 284 effectiveness compared to standard antihypertensive drugs. Only one study reported safety  
23 285 data: although no statistical analysis was performed, there were a number of side effects  
24 286 reported in the intervention group.<sup>49</sup>

25  
26  
27  
28  
29  
30 287 Two studies evaluated alternative therapies (n=117): there was no difference in BP control  
31 288 with L-arginine supplementation compared with placebo (one RCT, n=45).<sup>51</sup> One reported  
32 289 accelerated recovery of albuminuria with the administration of shengkangbao (Chinese herbal  
33 290 medicine) versus placebo (one quasi-randomised study, n=72). However, the clinical  
34 291 relevance of this outcome is uncertain, there was no difference between groups in the  
35 292 secondary outcomes of systolic BP, diastolic BP or serum creatinine and no safety data were  
36 293 reported.<sup>52</sup>

37  
38  
39  
40  
41  
42 294 A single RCT assessed corticosteroids in the management of severe preeclampsia postpartum  
43 295 (n=157).<sup>53 54</sup> No difference was demonstrated between groups in the primary outcome of  
44 296 antihypertensive medication requirement, or in the secondary outcomes of mean arterial  
45 297 pressure (MAP) or need for critical care admission, and no safety data were reported. There  
46 298 were small, statistically significant differences found in some laboratory values (platelet  
47 299 count, lactate dehydrogenase and aspartate transaminase). However, the authors  
48 300 acknowledged that the absolute differences were too small to be clinically relevant.<sup>53</sup>

49  
50  
51  
52  
53  
54  
55 301 A very small retrospective cohort study suggested an improvement in MAP with the addition  
56 302 of carperitide (atrial natriuretic peptide) to standard therapy (n=16), and no adverse effects

1  
2  
3 303 related to the intervention were reported.<sup>47</sup> However, the magnitude of the difference was not  
4 304 published, and the study was too small to draw any firm conclusions.

### 305 *Uterine curettage*

306 Six RCTs and two prospective cohort studies (n=837) have explored the role of uterine  
307 curettage in postpartum hypertension management. Uterine curettage is a similar process to  
308 that used in the surgical management of miscarriage: the lining of the uterus is scraped after  
309 completion of the third stage of labour in order to maximise placental tissue removal. This  
310 may be under direct vision following caesarean section, or via the transcervical route  
311 following vaginal birth. The latter approach may be ultrasound-guided and necessitates some  
312 form of anaesthesia. The theory underlying this intervention is that gestational hypertension  
313 and preeclampsia are placenta-mediated, and therefore ensuring complete evacuation of the  
314 uterus following childbirth may accelerate recovery.<sup>55 56</sup>

315 Seven studies explicitly stated they included both participants who delivered vaginally and  
316 those delivered by caesarean: four reported numbers undergoing vaginal delivery (n=248)  
317 and caesarean (n=321). One made no comment about the mode of birth.<sup>57</sup> Only one study  
318 reported maternal mortality: no difference between groups.<sup>15</sup> Two reported major maternal  
319 morbidity, but neither performed any statistical analysis (Table 2b). However, both studies  
320 did suggest a reduction in the absolute number of eclamptic seizures in the curettage group  
321 compared to no intervention.<sup>15 58</sup> In one, however, there was a relevant difference between the  
322 study groups: 28/28 (100%) in the control group were eclamptic at enrolment, compared to  
323 9/20 (45%) in the intervention group.<sup>58</sup> Four studies reported safety data, with none reporting  
324 any complications related to the intervention (Table 2b).<sup>59-62</sup>

325 All eight studies compared curettage with standard care (i.e. no additional intervention), and  
326 all suggested that uterine curettage resulted in a significantly lower BP.<sup>15 18 57-62</sup> One of these  
327 had two control groups: standard care, and oral nifedipine; when compared to oral nifedipine,  
328 no difference was noted with curettage.<sup>60</sup>

329 Five studies reported the magnitude of the difference in MAP between curettage and standard  
330 care: range 6-13mmHg.<sup>15 18 59 60 62</sup> Only two of these reported BP data beyond 24 hours  
331 postpartum: one RCT reported a significantly lower MAP at 48 hours with curettage  
332 (intervention group 104mmHg, control group 113mmHg, difference 9mmHg,  $p=0.0017$ ;  
333  $n=45$ ),<sup>60</sup> but the other RCT demonstrated no significant difference in MAP at 48 hours  
334 ( $n=420$ ).<sup>15</sup>

1  
2  
3 335 One study demonstrated that a greater proportion of the intervention group attained the target  
4 336 BP of <140/90mmHg at 24 (intervention group 9/20 (45%), control group 3/28 (11%):  
5 337 difference 34%, no *p*-value quoted) and 48 hours postpartum (intervention group 14/20  
6 338 (70%), control group 8/28 (29%): difference 41%, no *p*-value quoted).<sup>58</sup> Two studies did not  
7  
8  
9 339 present the size of the difference between groups.<sup>57 61</sup>  
10

## 11 12 13 **Discussion**

14 341 This review found evidence demonstrating that calcium-channel blockers, vasodilators and  
15 342 beta-blockers lower BP postpartum, but no clear answer to which was most effective and  
16 343 should, therefore, be preferentially prescribed. All but two studies examined the acute control  
17 344 of severe hypertension or short term BP control whilst women remained in hospital  
18 345 postpartum,<sup>25 37</sup> and so provide little guidance about prescription in the weeks after discharge.  
19 346 Moreover these both examined thiazide diuretics, not recommended in the UK for use whilst  
20 347 breastfeeding.<sup>8</sup> Complete safety data were limited across trials, as were data regarding  
21 348 objective clinical outcomes and two further studies examined antihypertensive agents not  
22 349 recommended for use postpartum in the UK (methyldopa and reserpine).<sup>63 64</sup> One trial  
23 350 evaluated captopril at a much higher daily dose than the UK recommended daily starting  
24 351 dose.<sup>64</sup>  
25  
26  
27  
28  
29  
30  
31  
32

33 352 Uterine curettage is not currently recommended, due to safety concerns regarding additional  
34 353 anaesthetic and operative risks, and the availability of alternative treatments to lower BP,  
35 354 particularly in the context of vaginal birth.<sup>65</sup> However, the included studies consistently  
36 355 demonstrated that uterine curettage improved BP control versus standard care,<sup>15 18 57-62</sup> with  
37 356 one reporting an equivalent effect to oral nifedipine.<sup>60</sup> Amongst the limited safety data none  
38 357 reported an excess complication rate (infection or uterine damage) with curettage, but given  
39 358 the low incidence of operative complications, the total population (n=837) was likely  
40 359 insufficient to adequately address potential competing risks. Furthermore, these studies did  
41 360 not demonstrate any impact from curettage on maternal mortality or severe morbidity and  
42 361 concerns exist about some studies' methodology. The evidence reviewed is insufficient to  
43 362 recommend incorporation of this intervention into routine clinical practice.  
44  
45  
46  
47  
48  
49  
50  
51

52  
53 363 Four trials evaluating loop diuretics failed to provide conclusive evidence of benefit. Three  
54 364 produced non-significant results in their main analysis,<sup>16 19 46</sup> and the single conference  
55 365 abstract which did suggest better BP control with oral furosemide, did not publish the  
56 366 magnitude of the difference, rendering it difficult to assess the clinical relevance.<sup>45</sup> In contrast  
57  
58  
59  
60

1  
2  
3 367 to the Cochrane review, we conclude that, at present, there is no evidence to support the  
4 368 routine use of diuretics postpartum.<sup>10</sup>  
5  
6

7 369 We found no adequate evidence to support alternative medications or a particular care model  
8 370 in the management of HDP postpartum. SSRIs substantially reduced BP versus placebo,<sup>48-50</sup>  
9 371 but no published data was identified comparing their efficacy with standard antihypertensive  
10 372 treatment, making it difficult to draw meaningful conclusions about their clinical application.  
11 373 Neither study evaluating postpartum care organisation reported maternal mortality or  
12 374 morbidity, or any measure of BP control, with both selecting postnatal readmissions as their  
13 375 primary outcome. An increased postnatal readmission rate, however, may not necessarily  
14 376 reflect harm: it might instead suggest that a particular model of care can better detect  
15 377 problems in the community and admit appropriately, ultimately resulting in a lower risk to  
16 378 patients.  
17  
18  
19  
20  
21  
22  
23

24 379 In light of the heterogeneous nature of research in this field, when designing this review, we  
25 380 included all interventions targeting hypertension management, but not end-organ  
26 381 complications, including eclampsia. Therefore, trials evaluating magnesium sulphate were  
27 382 outside the scope of this review. We acknowledge the relevance of this therapy in women  
28 383 with severe pre-eclampsia, especially in the immediate postnatal period, and a Cochrane  
29 384 review suggests there is no uncertainty regarding the effectiveness of this therapy.<sup>66</sup>  
30  
31  
32  
33  
34

35 385 A strength of this review is that cohort studies, case-control studies and quasi-randomised  
36 386 studies were eligible in addition to RCTs, and no language or date restrictions were imposed,  
37 387 resulting in a comprehensive review that provides evidence suggesting significant research  
38 388 gaps, consistent with the findings from the Cochrane review (2013).<sup>10</sup> The Cochrane review  
39 389 included only nine trials (author names in bold in Appendix S4). We believe our review adds  
40 390 to this, as an additional 30 studies are included (19 pre-dating the Cochrane search, and 11  
41 391 subsequent to it), providing a current and complete summary of all available research in the  
42 392 field.  
43  
44  
45  
46  
47  
48

49 393 The applicability of the findings and recommendations from this review are restricted by the  
50 394 low quality of included studies: both reviewers judged the vast majority to be at high overall  
51 395 risk of bias. Nearly one-quarter of the included studies were published only as conference  
52 396 abstracts, and therefore not subjected to peer review. Data extraction was restricted to the  
53 397 information provided in the abstracts (no authors provided additional data upon request).  
54 398 These were limiting factors in our analysis, but we nonetheless felt it was important to  
55  
56  
57  
58  
59  
60



1  
2  
3 399 include these studies for completeness, especially given the paucity of evidence that exists in  
4 400 this field. A further justification for their inclusion is that half of the trials reported in  
5 401 conference abstracts never reach full publication, and positive trials are more likely to be  
6 402 published than negative ones,<sup>67</sup> which has the potential to skew the results of a review if they  
7  
8  
9 403 are omitted.

10  
11  
12 404 A further limitation of this review is that the majority of identified studies did not report  
13 405 substantive clinical outcomes such as maternal mortality, morbidity or harms. Without these,  
14 406 it is difficult to define properly the potential role of proposed interventions in clinical  
15 407 practice. The incidence of adverse maternal and neonatal outcomes, particularly in high  
16 408 resource settings, is low meaning adequately powering studies for real outcomes of interest is  
17 409 financially demanding. Therefore researchers often employ surrogate outcomes. Additionally,  
18 410 the range of outcomes reported in included studies was broad and inconsistent, with BP  
19 411 changes in particular being measured in a variety of different ways, further limiting the  
20 412 comparability of trials. Increasingly, core-outcome sets are being produced, with a view to  
21 413 trials reporting as standard, a minimum set of outcomes that are clinically meaningful and  
22 414 important to patients.<sup>68</sup> We hope in future this would enhance our ability to synthesize results  
23 415 from different studies to produce high-quality evidence. There is consensus about trying to  
24 416 move away from surrogate outcomes, for example time to BP control, as they cannot  
25 417 effectively substitute for clinically important outcomes. An important and clinically  
26 418 meaningful end point should measure how a patient feels, functions, or survives.

27  
28  
29 419 The body of evidence identified was substantially smaller than that underpinning antenatal  
30 420 hypertension management: eighteen studies (n=982), not restricted to RCTs, evaluated  
31 421 antihypertensive medications postpartum. Furthermore, the size of all but a few individual  
32 422 studies was small. In comparison, a Cochrane review (2014) evaluating antihypertensive  
33 423 medication for mild to moderate hypertension in pregnancy included 49 RCTs (n=4,723).<sup>69</sup>  
34 424 Moreover, the quantity and quality of evidence supporting the management of HDP is vastly  
35 425 less than that available for essential hypertension outside pregnancy, where individual RCTs  
36 426 commonly involve several thousand participants.<sup>70</sup>

37  
38  
39 427 This review demonstrates a lack of good quality evidence for postpartum hypertension  
40 428 management, emphasising the need for further RCTs directly comparing different  
41 429 antihypertensive agents, BP thresholds for medication adjustment and different models of  
42 430 care, with outcome measures other than postnatal readmissions. We believe the studies

1  
2  
3 431 examining uterine curettage justify further research to evaluate clinically meaningful  
4 432 outcomes and procedural risks. It might be pragmatic to confine this to curettage at caesarean  
5 433 section, given concerns regarding surgical intervention after vaginal birth: an additional  
6 434 anaesthetic is not required; infection risk is lowered within a sterile surgical field compared to  
7 435 the transcervical route, and curettage under direct vision limits perforation risk. This might be  
8 436 beneficial in women with severe preeclampsia where BP control during pregnancy has been  
9 437 challenging despite multiple medications.<sup>55</sup>  
14  
15  
16  
17  
18  
19  
20  
21  
22  
23  
24  
25  
26  
27  
28  
29  
30  
31  
32  
33  
34  
35  
36  
37  
38  
39  
40  
41  
42  
43  
44  
45  
46  
47  
48  
49  
50  
51  
52  
53  
54  
55  
56  
57  
58  
59  
60

## **Acknowledgements**

Thanks to Dr Ly-Mee Yu, Dr Helen Cotton and Dr Victoria E Cairns for their assistance with translation.

## **Funding**

The research was funded by the National Institute for Health Research (NIHR) Collaboration for Leadership in Applied Health Research and Care Oxford at Oxford Health NHS Foundation Trust and via a Research Professorship awarded to RMcM (NIHR-RP-02-12-015). The views expressed are those of the author(s) and not necessarily those of the NHS, the NIHR or the Department of Health.

## **Details of ethical approval**

No ethical approval was required for this project.

## **Contribution to authorship**

AC drafted the protocol with JD and drafted and piloted the data extraction sheet. These were reviewed by RMcM, LP, KT, LM and PL. NR and AC wrote the search strategy, and the online searches were conducted by NR. AC and LP reviewed the search results independently and carried out the data extraction. This manuscript was drafted by AC and reviewed by RMcM, JD, LP, NR, KT, LM and PL. AC will be the guarantor.

## References

1. Podymow T, August P. Postpartum course of gestational hypertension and preeclampsia. *Hypertens Pregnancy* 2010;29(3):294-300. doi: 10.3109/10641950902777747
2. Goel A, Maski MR, Bajracharya S, et al. Epidemiology and Mechanisms of De Novo and Persistent Hypertension in the Postpartum Period. *Circulation* 2015;132(18):1726-33. doi: 10.1161/CIRCULATIONAHA.115.015721.
3. Chames MC, Livingston JC, Ivester TS, et al. Late postpartum eclampsia: a preventable disease? *Am J Obstet Gynecol* 2002;186(6):1174-7. doi: 10.1067/mob.2002.123824
4. Kayem G, Kurinczuk JJ, Spark P, et al. Maternal and obstetric factors associated with delayed postpartum eclampsia: a national study population. *Acta Obstet Gyn Scand* 2011;90(9):1017-23. doi: 10.1111/j.1600-0412.2011.01218.x
5. Watson DL, Sibai BM, Shaver DC, et al. Late postpartum eclampsia: an update. *South Med J* 1983;76(12):1487-9.
6. Martin JN, Jr., Thigpen BD, Moore RC, et al. Stroke and severe preeclampsia and eclampsia: a paradigm shift focusing on systolic blood pressure. *Obstet Gynecol* 2005;105(2):246-54. doi: 10.1097/01.AOG.0000151116.84113.56
7. Berks D, Steegers EA, Molas M, et al. Resolution of hypertension and proteinuria after preeclampsia. *Obstet Gynecol* 2009;114(6):1307-14. doi: 10.1097/AOG.0b013e3181c14e3e
8. National Institute for Health and Care Excellence. NICE Clinical Guideline 107: Hypertension in pregnancy: the management of hypertensive disorders during pregnancy, 2011.
9. ACOG Task Force on Hypertension in Pregnancy. Hypertension in Pregnancy: American College of Obstetricians and Gynecologists, 2013.
10. Magee L, von Dadelszen P. Prevention and treatment of postpartum hypertension. *Cochrane Database Syst Rev* 2013(4) doi: 10.1002/14651858.CD004351.pub3
11. Moher D, Shamseer L, Clarke M, et al. Preferred reporting items for systematic review and meta-analysis protocols (PRISMA-P) 2015 statement. *Syst Rev* 2015;4(1) doi: 10.1186/2046-4053-4-1

- 1  
2  
3 12. McManus RJ, Wilson S, Delaney BC, et al. Review of the usefulness of contacting other experts  
4 when conducting a literature search for systematic reviews. *BMJ* 1998;317:1562-3.  
5  
6  
7 13. Higgins JPT, Altman DG, Gøtzsche PC, et al. The Cochrane Collaboration's tool for assessing  
8 risk of bias in randomised trials. *BMJ* 2011;343:d5928. doi: 10.1136/bmj.d5928  
9  
10  
11 14. Wells GA, Shea B, O'Connell D, et al. The Newcastle-Ottawa Scale (NOS) for assessing the  
12 quality of nonrandomised studies in meta-analyses [Available from:  
13 [http://www.ohri.ca/programs/clinical\\_epidemiology/oxford.htm](http://www.ohri.ca/programs/clinical_epidemiology/oxford.htm) accessed 14/07/2017 2017.  
14  
15  
16  
17 15. Ragab A, Goda H, Raghieb M, et al. Does immediate postpartum curettage of the endometrium  
18 accelerate recovery from preeclampsia-eclampsia? A randomized controlled trial. *Arch Gynecol*  
19 *Obstet* 2013;288(5):1035-8. doi: 10.1007/s00404-013-2866-0  
20  
21  
22  
23 16. Ascarelli MH, Johnson V, McCreary H, et al. Postpartum preeclampsia management with  
24 furosemide: a randomized clinical trial. *Obstet Gynecol* 2005;105(1):29-33.  
25  
26  
27 17. Begum MR, Quadir E, Begum A, et al. Management of hypertensive emergencies of pregnancy  
28 by hydralazine bolus injection vs continuous drip-a comparative study. *MedGenMed* 2002;4(4)  
29  
30  
31 18. Mallapur A, Renuka B, Katageri G, et al. Role of postpartum curettage in recovery of severe  
32 preeclampsia and eclampsia patients-a randomised controlled trial. *Int J Gynaecol Obstet*  
33 2015;131(Suppl 5):E191.  
34  
35  
36  
37 19. Veena P, Perivela L, Raghavan SS. Furosemide in postpartum management of severe  
38 preeclampsia: A randomized controlled trial. *Hypertens Pregnancy* 2017;36(1):84-9. doi:  
39 10.1080/10641955.2016.1239735  
40  
41  
42  
43 20. United Nations Department of Economic and Social Affairs. World economic situation and  
44 prospects 2016. New York, United States of America: United Nations, 2016.  
45  
46  
47 21. Vermillion ST, Scardo JA, Newman RB, et al. A randomized, double-blind trial of oral nifedipine  
48 and intravenous labetalol in hypertensive emergencies of pregnancy. *Am J Obstet Gynecol*  
49 1999;181(4):858-61.  
50  
51  
52  
53 22. Mabie WC, Gonzalez AR, Sibai BM, et al. A comparative trial of labetalol and hydralazine in the  
54 acute management of severe hypertension complicating pregnancy. *Obstet Gynecol* 1987;70(3, Part  
55 1):328-33.  
56  
57  
58  
59  
60

- 1  
2  
3 23. Hennessy A, Thornton CE, Makris A, et al. A randomised comparison of hydralazine and mini-  
4 bolus diazoxide for hypertensive emergencies in pregnancy: the PIVOT trial. *Aust N Z J Obstet*  
5 *Gynaecol* 2007;47(4):279-85. doi: 10.1111/j.1479-828X.2007.00738.x  
6  
7  
8  
9 24. Garden A, Davey DA, Dommissie J. Intravenous labetalol and intravenous dihydralazine in severe  
10 hypertension in pregnancy. *Clin Exp Hypertens B* 1982;1(2-3):371-83.  
11  
12 25. Gaisin IR, Iskchakova AS, Shilina LV. Indapamide in the management of post-partum  
13 hypertension: A randomized, case-control study. *Eur Heart J* 2013;34(Suppl 1):271.  
14  
15 26. York R, Brown LP, Samuels P, et al. A randomized trial of early discharge and nurse specialist  
16 transitional follow-up care of high-risk childbearing women. *Nurs Res* 1997;46(5):254-61.  
17  
18 27. Sharma KJ, Greene N, Kilpatrick SJ. Oral labetalol compared to oral extended release nifedipine  
19 for persistent postpartum hypertension: A randomized controlled trial. *Am J Obstet Gynecol*  
20 2016;214(Suppl 1):S27-8.  
21  
22 28. Sharma KJ, Greene N, Kilpatrick SJ. Oral labetalol compared to oral nifedipine for postpartum  
23 hypertension: A randomized controlled trial. *Hypertens Pregnancy* 2017;36(1):44-7. doi:  
24 10.1080/10641955.2016.1231317  
25  
26 29. Noronha Neto C, Maia SSB, Katz L, et al. Clonidine versus Captopril for Severe Postpartum  
27 Hypertension: A Randomized Controlled Trial. *PLoS One* 2017;12(1) doi:  
28 10.1371/journal.pone.0168124  
29  
30 30. Amorim MMR, Noronha Neto C, Maia SB, et al. Clonidine compared with captopril for severe  
31 postpartum hypertension. *Obstet Gynecol* 2015;125(5 Suppl 1):42S.  
32  
33 31. Katz L, Noronha Neto C, Maia S, et al. Clonidine versus captopril for severe postpartum  
34 hypertension: A randomized controlled trial. *Pregnancy Hypertens* 2015;5(Suppl 1):29-30. doi:  
35 10.1016/j.preghy.2014.10.061  
36  
37 32. Barton JR, Hiatt AK, Conover WB. The use of nifedipine during the postpartum period in patients  
38 with severe preeclampsia. *Am J Obstet Gynecol* 1990;162(3):788-92.  
39  
40 33. Bibbo C, Celi A, Thomas AM, et al. Does the addition of a specialized postpartum clinic improve  
41 the care of women with preeclampsia? *Obstet Gynecol* 2014;123(5 Suppl 1):39S.  
42  
43  
44  
45  
46  
47  
48  
49  
50  
51  
52  
53  
54  
55  
56  
57  
58  
59  
60

- 1  
2  
3 34. Sayin NC, Altundag G, Varol FG. Efficacy of alpha-methyldopa and nifedipine in the treatment of  
4 postpartum hypertension. [Turkish] Postpartum hipertansiyon tedavisinde alfametildopa ve  
5 nifedipinin etkinligi. *J Turk Ger Gynecol Assoc* 2005;6(2):118-22.  
6  
7  
8  
9 35. Vigil-De Gracia P, Ruiz E, Lopez JC, et al. Management of severe hypertension in the postpartum  
10 period with intravenous hydralazine or labetalol: a randomized clinical trial. *Hypertens Pregnancy*  
11 2007;26(2):163-71. doi: 10.1080/10641950701204430  
12  
13  
14 36. Palot M, Jakob L, Decaux J. Arterial hypertensions of labor and the post-partum period. [French]  
15 Les Hypertensions Arteriellles Du Travail Et Du Post-Partum. *Rev Fr Gynecol Obstet* 1979;74(3):173-  
16 6.  
17  
18  
19  
20  
21 37. Ilshat Gaisin IR, Iskchakova AS, Shilina LV. Control of cardiovascular risk factors with  
22 ursodeoxycholic acid and indapamide in postpreeclamptic nursing mothers: Results from a  
23 randomized, case-control 1-year study. *Eur J Prev Cardiol* 2014;21(Suppl 1):S120. doi:  
24 10.1177/2047487314534585  
25  
26  
27  
28  
29 38. Griffis KR, Jr., Martin JN, Jr., Palmer SM, et al. Utilization of hydralazine or alpha-methyldopa  
30 for the management of early puerperal hypertension. *Am J Perinatol* 1989;6(4):437-41.  
31  
32  
33 39. Martin JN, Griffis KR, Martin RW, et al. Early puerperal hypertension management: hydralazine  
34 vs methyldopa. *Clin Exp Hypertens B* 1988;8(2):431.  
35  
36  
37 40. Walss Rodriguez RJ, Villarreal Ordaz F. Management of severe pre-eclampsia in the puerperium.  
38 Comparative study of sublingual nifedipine and hydralazine. *Ginecol Obstet Mex* 1991;59:207-10.  
39  
40  
41 41. Shumard K, Yoon J, Huang C, et al. Peripartum anti-hypertensive choice affects time to blood  
42 pressure control in treating hypertensive disorders of pregnancy. *Am J Obstet Gynecol* 2016;214(1  
43 Suppl):S378.  
44  
45  
46  
47 42. Fidler J, Smith V, De Swiet M. A randomized study comparing timolol and methyldopa in  
48 hospital treatment of puerperal hypertension. *Br J Obstet Gynaecol* 1982;89(12):1031-4.  
49  
50  
51 43. Krebs A. Experience with serpasil and luminal in the management of pregnancy-and puerperal  
52 toxemias. *Gynaecologia* 1956;141(4):255-60.  
53  
54  
55 44. Krebs A. Tests of reserpine and phenobarbital in therapy of toxicosis of pregnancy and  
56 puerperium. *Geburtshilfe Frauenheilkd* 1956;16(5):410-22.  
57  
58  
59

- 1  
2  
3 45. Amorim M, Katz L, Cursino T, et al. Postpartum furosemide for accelerating recovery in women  
4 with severe preeclampsia: A randomized clinical trial. *Int J Gynaecol Obstet* 2015;131(Suppl  
5 5):E195.  
6  
7  
8  
9 46. Matthews G, Gornall R, Saunders NJ. A randomised placebo controlled trial of loop diuretics in  
10 moderate/severe pre-eclampsia, following delivery. *J Obstet Gynaecol* 1997;17(1):30-2. doi:  
11 10.1080/01443619750114040  
12  
13 47. Shigemitsu A, Akasaka J, Shigetomi H, et al. Use of carperitide for postpartum diuresis of severe  
14 preeclampsia. *Pregnancy Hypertens* 2015;5(1):145. doi: 10.1016/j.preghy.2014.10.297  
15  
16 48. Weiner CP, Socol ML. Serotonin (5HT) receptor blockade in puerperal pre-eclampsia. *Clin Exp*  
17 *Hypertens B* 1982;1(2-3):195.  
18  
19 49. Weiner CP, Socol ML, Vaisrub N. Control of preeclamptic hypertension by ketanserin, a new  
20 serotonin receptor antagonist. *Am J Obstet Gynecol* 1984;149(5):496-500.  
21  
22 50. Montenegro R, Knuppel RA, Shah D, et al. The effect of serotonergic blockade in postpartum  
23 preeclamptic patients. *Am J Obstet Gynecol* 1985;153(2):130-4.  
24  
25 51. Hladunewich MA, Derby GC, Lafayette RA, et al. Effect of L-arginine therapy on the glomerular  
26 injury of preeclampsia: a randomized controlled trial. *Obstet Gynecol* 2006;107(4):886-95. doi:  
27 10.1097/01.AOG.0000207637.01824.fe  
28  
29 52. Liu Z, Wang X, Yan N. Treatment of albuminuria in gestational hypertension puerpera in the  
30 severe preeclampsia stage by TCM therapy for stasis-removing and diuresis. *Zhongguo Zhong Xi Yi*  
31 *Jie He Za Zhi* 2009;29(3):222-4.  
32  
33 53. Barrilleaux PS, Martin JN, Jr., Klauser CK, et al. Postpartum intravenous dexamethasone for  
34 severely preeclamptic patients without hemolysis, elevated liver enzymes, low platelets (HELLP)  
35 syndrome: a randomized trial. *Obstet Gynecol* 2005;105(4):843-8.  
36  
37 54. Barrilleaux PS, Martin Jr J, Klauser C, et al. Adjunctive intravenous dexamethasone in patients  
38 with severe preeclampsia not complicated by HELLP syndrome. *Am J Obstet Gynecol* 2003;189(6  
39 Suppl):S94.  
40  
41  
42  
43  
44  
45  
46  
47  
48  
49  
50  
51  
52  
53  
54  
55  
56  
57  
58  
59  
60



- 1  
2  
3 55. Caughey AB. Editorial Comment: Does Immediate Postpartum Curettage of the Endometrium  
4 Accelerate Recovery From Preeclampsia–Eclampsia? A Randomized Controlled Trial. *Obstet*  
5 *Gynecol Surv* 2014;69(3):121-2. doi: 10.1097/ogx.0000000000000040  
6  
7  
8  
9 56. Hunter CA, Jr., Howard WF, McCormick CO, Jr. Amelioration of the hypertension of toxemia by  
10 postpartum curettage. *Am J Obstet Gynecol* 1961;81(5):884-9.  
11  
12 57. Gocmen A, Yayla M, Ceylan Erden A, et al. The effect of postpartum curettage in severe  
13 preeclampsia and eclampsia in recovery (Ağır preeklampsı ve eklampsi in iyileşmesinde postpartum  
14 kuretajın etkisi). *Perinatoloji Dergisi* 1996;4(1):24.  
15  
16 58. Salvatore CA, Carduz E, Ciccivizzo E, et al. Postpartum curettage in severe toxemia with and  
17 without premature loosening of the placenta. *Matern Infanc (Sao Paulo)* 1967;26(3):275-86.  
18  
19 59. Magann EF, Martin JN, Jr., Isaacs JD, et al. Immediate postpartum curettage: accelerated recovery  
20 from severe preeclampsia. *Obstet Gynecol* 1993;81(4):502-6.  
21  
22 60. Magann EF, Bass JD, Chauhan SP, et al. Accelerated recovery from severe preeclampsia: uterine  
23 curettage versus nifedipine. *J Soc Gynecol Investig* 1994;1(3):210-4.  
24  
25 61. Gomez LM, De la Vega GA, Ludmir J, et al. Immediate postpartum curettage accelerates clinical  
26 recovery in severe preeclampsia. *Obstet Gynecol* 2005;105(4 Suppl 4):111S.  
27  
28 62. Alkan A, Tugrul S, Oral O, et al. Effects of postpartum uterine curettage on maternal well-being  
29 in severe preeclamptic patients. *Clin Obstet Gynecol* 2006;33(1):55-8.  
30  
31 63. Webster J, Koch HF. Aspects of tolerability of centrally acting antihypertensive drugs. *J*  
32 *Cardiovasc Pharmacol* 1996;27(Suppl 3):S49-54.  
33  
34 64. Joint Formulary Committee. British National Formulary (BNF). 71 ed: BMJ Publishing Group Ltd  
35 and Royal Pharmaceutical Society 2016.  
36  
37 65. Tan LK, de Swiet M. The management of postpartum hypertension. *Br J Obstet Gynaecol*  
38 2002;109(7):733-6.  
39  
40 66. Duley L, Gulmezoglu AM, Henderson-Smart DJ, et al. Magnesium sulphate and other  
41 anticonvulsants for women with pre-eclampsia. *Cochrane Database Syst Rev* 2010(11) doi:  
42 10.1002/14651858.CD000025.pub2  
43  
44  
45  
46  
47  
48  
49  
50  
51  
52  
53  
54  
55  
56  
57  
58  
59  
60

- 1  
2  
3 67. Scherer RW, Langenberg P, von Elm E. Full publication of results initially presented in abstracts.  
4  
5 *Cochrane Database Syst Rev* 2007(2) doi: 10.1002/14651858.MR000005.pub3  
6  
7 68. Khan K. The CROWN Initiative: journal editors invite researchers to develop core outcomes in  
8  
9 women's health. *Br J Obstet Gynaecol* 2014;121(10):1181-2. doi: 10.1111/1471-0528.12929  
10  
11 69. Abalos E, Duley L, Steyn DW. Antihypertensive drug therapy for mild to moderate hypertension  
12  
13 during pregnancy. *Cochrane Database Syst Rev* 2014(2) doi: 10.1002/14651858.CD002252.pub3  
14  
15 70. National Institute for Health and Care Excellence. NICE Clinical Guideline 127: Hypertension in  
16  
17 adults: diagnosis and management, 2011.  
18  
19  
20  
21  
22  
23  
24  
25  
26  
27  
28  
29  
30  
31  
32  
33  
34  
35  
36  
37  
38  
39  
40  
41  
42  
43  
44  
45  
46  
47  
48  
49  
50  
51  
52  
53  
54  
55  
56  
57  
58  
59  
60

## Tables and figures

Figure 1: PRISMA Flowchart

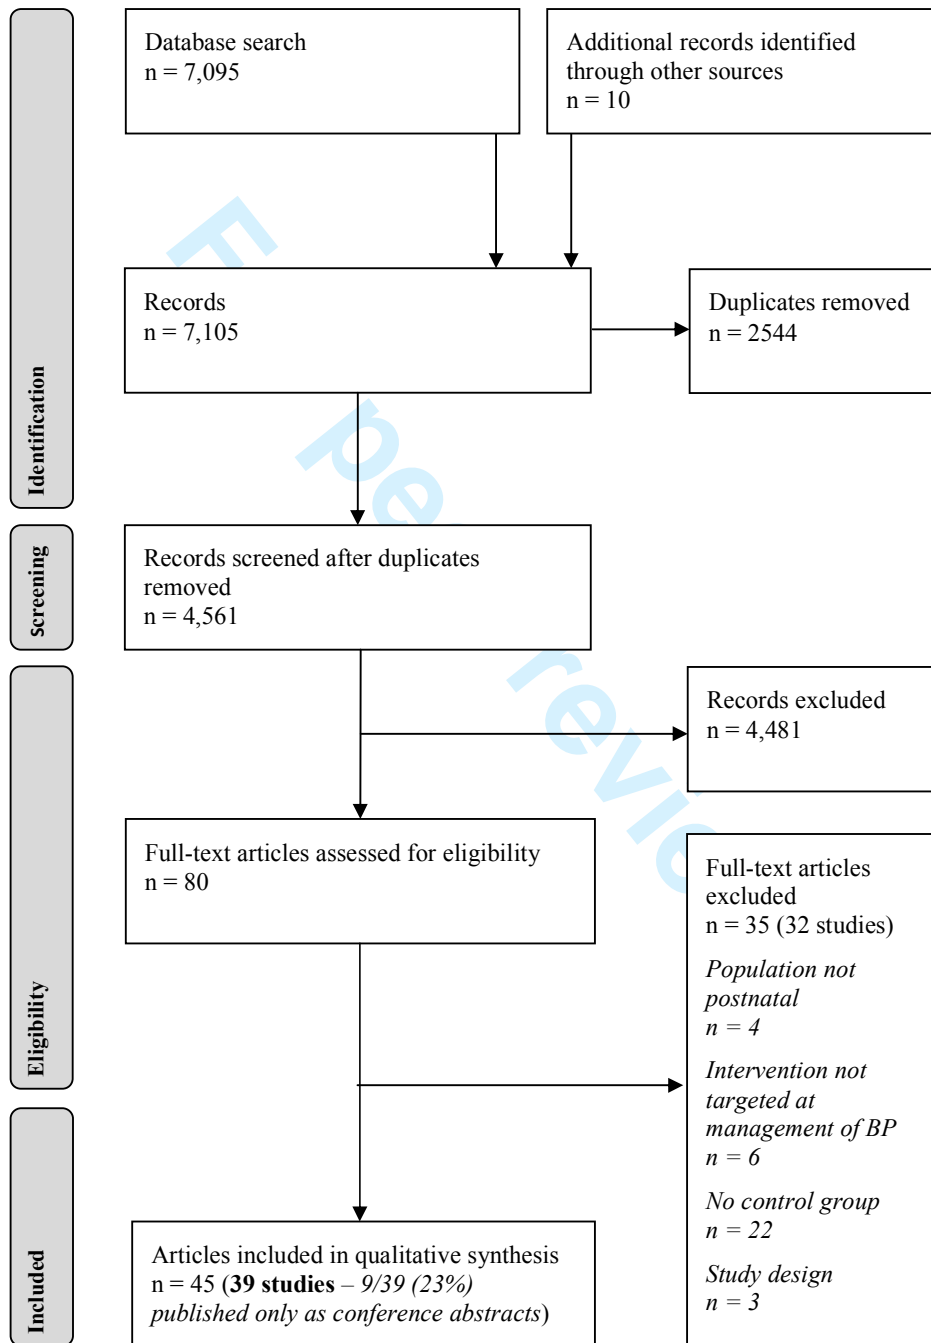

**Table 1: Outcome measures**

|                             | <b>Outcome measures</b>                                                                                                                                                             | <b>Timing</b>                                                                                 |
|-----------------------------|-------------------------------------------------------------------------------------------------------------------------------------------------------------------------------------|-----------------------------------------------------------------------------------------------|
| <b>Primary outcome(s)</b>   | Maternal mortality                                                                                                                                                                  | Direct maternal deaths up to day 42 postpartum; later maternal deaths up to 1 year postpartum |
|                             | Maternal morbidity (ischaemic stroke, intracranial haemorrhage, eclamptic seizure; development of preeclampsia with severe features; postnatal complication requiring intervention) |                                                                                               |
|                             | Systolic blood pressure control                                                                                                                                                     |                                                                                               |
|                             | Diastolic blood pressure control                                                                                                                                                    |                                                                                               |
|                             | Mean arterial pressure control                                                                                                                                                      |                                                                                               |
|                             | Safety data (adverse events or maternal side effects)                                                                                                                               |                                                                                               |
| <b>Secondary outcome(s)</b> | Critical care admission                                                                                                                                                             |                                                                                               |
|                             | Length of hospital stay following delivery                                                                                                                                          |                                                                                               |
|                             | Postnatal readmission to secondary care                                                                                                                                             |                                                                                               |
|                             | Antihypertensive medication requirement                                                                                                                                             |                                                                                               |
|                             | Urine output                                                                                                                                                                        |                                                                                               |
|                             | Laboratory values<br>Other as defined by study                                                                                                                                      |                                                                                               |

Table 2a: Primary outcome and safety data reporting in included studies (Antihypertensive medications, 18 studies)

| Study ID                                    | Intervention                                           | Control                                   | Primary outcome assessment |                    |             | Safety data reporting | Results (for reported outcomes) |                                                                                                                                                                                                                                                                                                |
|---------------------------------------------|--------------------------------------------------------|-------------------------------------------|----------------------------|--------------------|-------------|-----------------------|---------------------------------|------------------------------------------------------------------------------------------------------------------------------------------------------------------------------------------------------------------------------------------------------------------------------------------------|
|                                             |                                                        |                                           | Maternal mortality         | Maternal morbidity | SBP control |                       |                                 | DBP control                                                                                                                                                                                                                                                                                    |
| <b>CALCIUM CHANNEL BLOCKERS (3 studies)</b> |                                                        |                                           |                            |                    |             |                       |                                 |                                                                                                                                                                                                                                                                                                |
| Barton 1990 <sup>32</sup>                   | Nifedipine (oral)                                      | Placebo                                   |                            |                    | ●           | ●                     | ●                               | SBP control: no significant difference.<br>DBP control: no significant difference.<br>MAP control: improved in intervention group (difference 6.3mmHg, p<0.05).                                                                                                                                |
| Vermillion 1999 <sup>21</sup>               | Nifedipine (oral)                                      | Labetalol (IV bolus)                      |                            |                    | ●           | ●                     | ●                               | SBP control: improved in intervention group (difference in time to target BP 18.5 minutes, p=0.002).<br>DBP control: improved in intervention group (difference in time to target BP 18.5 minutes, p=0.002).<br>Safety: no significant difference. 1/25 intervention group became hypotensive. |
| Sayin 2005 <sup>34</sup>                    | Nifedipine (oral)                                      | Methyldopa (oral)                         | ●                          |                    | ●           | ●                     |                                 | Maternal mortality: no significant difference.<br>SBP control: no significant difference.<br>DBP control: no significant difference.                                                                                                                                                           |
| <b>VASODILATORS (6 studies)</b>             |                                                        |                                           |                            |                    |             |                       |                                 |                                                                                                                                                                                                                                                                                                |
| Palot 1979 <sup>36</sup>                    | Hydralazine (IV infusion) plus furosemide (IV bolus)   | Clonidine (IV) plus furosemide (IV bolus) |                            | ●                  |             |                       |                                 | Maternal morbidity: no statistical analysis.                                                                                                                                                                                                                                                   |
| Griffis 1989 <sup>38, 39</sup>              | Hydralazine (IM)                                       | Methyldopa (IV bolus)                     |                            |                    |             | ●                     | ●                               | MAP control: no significant difference.<br>Safety: no significant difference. No side effects reported in either group.                                                                                                                                                                        |
| Walss Rodriguez 1991 <sup>40</sup>          | Hydralazine (oral) plus nifedipine (oral, as required) | Nifedipine (oral, as required)            |                            |                    | ●           | ●                     |                                 | SBP control: no significant difference.<br>DBP control: no significant difference.                                                                                                                                                                                                             |
| Begum 2002 <sup>17</sup>                    | Hydralazine (IV bolus)                                 | Hydralazine (IV infusion)                 |                            |                    |             | ●                     | ●                               | DBP control: improved in intervention group (difference in time to target DBP 121.1 minutes, p<0.001).<br>Safety: no significant difference. No side effects reported in either group.                                                                                                         |
| Vigil de Gracia 2007 <sup>35</sup>          | Hydralazine (IV bolus)                                 | Labetalol (IV bolus)                      | ●                          | ●                  | ●           | ●                     | ●                               | Maternal mortality: no significant difference.<br>Maternal morbidity: no significant difference.<br>SBP control: no significant difference.<br>DBP control: no significant difference.<br>Safety: no significant difference. Small numbers of side effects reported in both groups.            |
| Hennessy 2007 <sup>23</sup>                 | Diazoxide (IV bolus)                                   | Hydralazine (IV bolus)                    |                            |                    | ●           | ●                     |                                 | SBP control: improved in intervention group (difference in percentage achieving target BP 23%, p<0.01).<br>DBP control: improved in intervention group (difference in percentage achieving target BP 23%, p<0.01).                                                                             |
| <b>BETA BLOCKERS (5 studies)</b>            |                                                        |                                           |                            |                    |             |                       |                                 |                                                                                                                                                                                                                                                                                                |
| Garden 1982 <sup>24</sup>                   | Labetalol (IV infusion)                                | Dihydralazine (IV infusion)               |                            |                    |             | ●                     | ●                               | DBP control: no statistical analysis.<br>Safety: no statistical analysis. 1/6 intervention group developed bronchospasm. 4/6 control group developed tachycardia and 1/6 developed oliguria. 4/6 control group – drug stopped due to a precipitous fall of DBP to 40-50mmHg.                   |

| Study ID                                         | Intervention                                       | Control                | Primary outcome assessment |                    |             |             |             | Safety data reporting | Results (for reported outcomes)                                                                                                                                                                                                                                                                                                                                                                                   |
|--------------------------------------------------|----------------------------------------------------|------------------------|----------------------------|--------------------|-------------|-------------|-------------|-----------------------|-------------------------------------------------------------------------------------------------------------------------------------------------------------------------------------------------------------------------------------------------------------------------------------------------------------------------------------------------------------------------------------------------------------------|
|                                                  |                                                    |                        | Maternal mortality         | Maternal morbidity | SBP control | DBP control | MAP control |                       |                                                                                                                                                                                                                                                                                                                                                                                                                   |
| Fidler 1982 <sup>42</sup>                        | Timolol (oral)                                     | Methyldopa (oral)      |                            |                    | ●           | ●           |             | ●                     | SBP control: improved in intervention group (difference 5.1mmHg, p<0.05).<br>DBP control: no significant difference.<br>Safety: no statistical analysis. 1/40 intervention group became disorientated. 1/40 control group became hypotensive and 1/40 became drowsy.                                                                                                                                              |
| Mabie 1987 <sup>22</sup>                         | Labetalol (IV bolus)                               | Hydralazine (IV bolus) |                            |                    |             |             | ●           | ●                     | MAP control: improved in control group (difference 7.8mmHg (p 0.02)).<br>Safety: no statistical analysis. 1/40 intervention group developed scalp tingling. 2/20 control group developed headaches.                                                                                                                                                                                                               |
| Shumard 2016 <sup>41</sup>                       | Labetalol (oral)                                   | Nifedipine (oral)      |                            |                    | ●           | ●           |             |                       | SBP control: improved in control group (difference in time to achieve target BP 1 day, p=0.0031).<br>DBP control: improved in control group (difference in time to achieve target BP 1 day, p=0.0031).                                                                                                                                                                                                            |
| Sharma 2017 <sup>27 28</sup>                     | Labetalol (oral)                                   | Nifedipine (oral)      |                            |                    | ●           | ●           |             | ●                     | SBP: no significant difference.<br>DBP: no significant difference.<br>Safety: No major side effects reported in either group. Minor side effects more commonly reported in control group (20% intervention, 48% control, p=0.04).                                                                                                                                                                                 |
| <b>THIAZIDES (2 studies)</b>                     |                                                    |                        |                            |                    |             |             |             |                       |                                                                                                                                                                                                                                                                                                                                                                                                                   |
| Gaisin 2013 <sup>25</sup>                        | Indapamide (oral)                                  | Methyldopa (oral)      |                            |                    | ●           | ●           |             | ●                     | SBP control: no significant difference.<br>DBP control: no significant difference.<br>Safety: no statistical analysis, no details reported.                                                                                                                                                                                                                                                                       |
| Gaisin 2014 <sup>37</sup>                        | Indapamide (oral) plus ursodeoxycholic acid (oral) | Methyldopa (oral)      |                            |                    | ●           | ●           |             | ●                     | SBP control: no significant difference.<br>DBP control: no significant difference.<br>Safety: no significant difference. No adverse events reported in either group.                                                                                                                                                                                                                                              |
| <b>INDOLE ALKALOIDS (1 study)</b>                |                                                    |                        |                            |                    |             |             |             |                       |                                                                                                                                                                                                                                                                                                                                                                                                                   |
| Krebs 1956 <sup>43 44</sup>                      | Reserpine (oral or IM)                             | Phenobarbital          |                            |                    | ●           | ●           |             | ●                     | SBP control: no statistical analysis.<br>DBP control: no statistical analysis.<br>Safety: no statistical analysis. No adverse events reported in intervention group, no comment on control.                                                                                                                                                                                                                       |
| <b>CENTRALLY-ACTING ALPHA-AGONISTS (1 study)</b> |                                                    |                        |                            |                    |             |             |             |                       |                                                                                                                                                                                                                                                                                                                                                                                                                   |
| Noronha Neto 2016 <sup>29-31</sup>               | Clonidine (oral)                                   | Captopril (oral)       | ●                          | ●                  | ●           | ●           |             | ●                     | Maternal mortality: no significant difference.<br>Maternal morbidity: no significant difference.<br>SBP control: improved in intervention group (difference in number of episodes of high BP (1.4, p<0.08)).<br>DBP: improved in intervention group (difference in number of episodes of high BP (1.4, p<0.08)).<br>Safety: no significant difference. Adverse reactions 18.6% intervention, 28.8% control, p=NS. |

**Table 2b: Primary outcome and safety data reporting in included studies (Loop diuretics, other drugs, uterine curettage and organisation of care, 21 studies)**

| Study ID                          | Intervention                          | Control           | Primary outcome assessment |                    |             |             |             | Safety data reporting                                                                                                                                                                                                                                                        | Results (for reported outcomes) |
|-----------------------------------|---------------------------------------|-------------------|----------------------------|--------------------|-------------|-------------|-------------|------------------------------------------------------------------------------------------------------------------------------------------------------------------------------------------------------------------------------------------------------------------------------|---------------------------------|
|                                   |                                       |                   | Maternal mortality         | Maternal morbidity | SBP control | DBP control | MAP control |                                                                                                                                                                                                                                                                              |                                 |
| <b>LOOP DIURETICS (4 studies)</b> |                                       |                   |                            |                    |             |             |             |                                                                                                                                                                                                                                                                              |                                 |
| Matthews 1997 <sup>46</sup>       | Furosemide (oral)                     | Placebo           |                            |                    |             |             | ●           | MAP control: no significant difference.                                                                                                                                                                                                                                      |                                 |
| Ascarelli 2005 <sup>16</sup>      | Furosemide (oral)                     | No intervention   |                            | ●                  | ●           | ●           |             | Maternal morbidity: no significant difference.<br>SBP control: no significant difference.<br>DBP control: no significant difference.                                                                                                                                         |                                 |
| Amorim 2015 <sup>45</sup>         | Furosemide (oral)                     | Placebo           |                            |                    | ●           | ●           | ●           | SBP control: improved in intervention group (difference not stated, p<0.001).<br>DBP control: improved in intervention group (difference not stated, p<0.001).<br>MAP control: improved in intervention group (difference not stated, p<0.001).                              |                                 |
| Veena 2017 <sup>19</sup>          | Furosemide (oral) + nifedipine (oral) | Nifedipine (oral) |                            | ●                  | ●           | ●           | ●           | Maternal morbidity: no significant difference.<br>SBP control: no significant difference.<br>DBP control: no significant difference.<br>MAP control: no significant difference.                                                                                              |                                 |
| <b>OTHER DRUGS (7 studies)</b>    |                                       |                   |                            |                    |             |             |             |                                                                                                                                                                                                                                                                              |                                 |
| <b>Selective 5-HT antagonists</b> |                                       |                   |                            |                    |             |             |             |                                                                                                                                                                                                                                                                              |                                 |
| Weiner 1982 <sup>48</sup>         | R41468 (intravenous infusion)         | Placebo           |                            |                    |             |             | ●           | MAP control: improved in intervention group (difference 25.6mmHg, p<0.001).<br>SBP control: improved in intervention group (difference in SBP decline 34mmHg, p<0.001).<br>DBP control: improved in intervention group (difference in DBP decline 27mmHg, p<0.001).          |                                 |
| Weiner 1984 <sup>49</sup>         | Ketanserin (IV infusion)              | Placebo           |                            | ●                  | ●           | ●           | ●           | MAP control: improved in intervention group (difference not stated, p<0.001)<br>Safety: No statistical analysis. 3/20 intervention group experienced blurred vision: 1 of these was hypotensive (responded to hydration). 1/20 intervention group experienced mild euphoria. |                                 |
| Montenegro 1985 <sup>50</sup>     | Ketanserin (IV bolus +/- infusion)    | Placebo           |                            | ●                  | ●           | ●           | ●           | SBP control: improved in intervention group (absolute difference not stated, p<0.001).<br>DBP control: improved in intervention group (absolute difference not stated, p<0.001).<br>MAP control: improved in intervention group (absolute difference not stated, p<0.001).   |                                 |
| <b>Alternative therapies</b>      |                                       |                   |                            |                    |             |             |             |                                                                                                                                                                                                                                                                              |                                 |
| Hladunewich 2006 <sup>51</sup>    | L-arginine (oral or IV bolus)         | Placebo           |                            |                    | ●           | ●           | ●           | SBP control: no significant difference.<br>DBP control: no significant difference.<br>MAP control: no significant difference.<br>Safety: no significant difference. No adverse events reported in either group.                                                              |                                 |
| Liu 2009 <sup>52</sup>            | Shengkangbao (oral or IV bolus)       | No intervention   |                            |                    | ●           | ●           |             | SBP control: no significant difference.<br>DBP control: no significant difference.                                                                                                                                                                                           |                                 |

| Study ID                                | Intervention                      | Control                              | Primary outcome assessment |                    |             |             |             | Safety data reporting                                                                                                                                                                                                                                                                                                               | Results (for reported outcomes) |
|-----------------------------------------|-----------------------------------|--------------------------------------|----------------------------|--------------------|-------------|-------------|-------------|-------------------------------------------------------------------------------------------------------------------------------------------------------------------------------------------------------------------------------------------------------------------------------------------------------------------------------------|---------------------------------|
|                                         |                                   |                                      | Maternal mortality         | Maternal morbidity | SBP control | DBP control | MAP control |                                                                                                                                                                                                                                                                                                                                     |                                 |
| <b>Steroids</b>                         |                                   |                                      |                            |                    |             |             |             |                                                                                                                                                                                                                                                                                                                                     |                                 |
| Barrilleaux 2005 <sup>53 54</sup>       | Dexamethasone (IV bolus)          | Placebo                              |                            |                    |             |             | ●           | MAP control: no significant difference.                                                                                                                                                                                                                                                                                             |                                 |
| <b>Atrial natriuretic peptide</b>       |                                   |                                      |                            |                    |             |             |             |                                                                                                                                                                                                                                                                                                                                     |                                 |
| Shigemitsu 2015 <sup>47</sup>           | Carperitide (route not specified) | No intervention                      | ●                          |                    |             |             | ●           | Maternal mortality: no significant difference.<br>MAP control: no significant difference.<br>Safety: no significant difference. No adverse events reported in either group.                                                                                                                                                         |                                 |
| <b>UTERINE CURETTAGE (8 studies)</b>    |                                   |                                      |                            |                    |             |             |             |                                                                                                                                                                                                                                                                                                                                     |                                 |
| Salvatore 1967 <sup>58</sup>            | Uterine curettage                 | No intervention                      |                            | ●                  | ●           | ●           |             | Maternal morbidity: no statistical analysis.<br>SBP control: no statistical analysis.<br>DBP control: no statistical analysis.                                                                                                                                                                                                      |                                 |
| Magann 1993 <sup>59</sup>               | Uterine curettage                 | No intervention                      |                            |                    |             |             | ●           | MAP control: improved in intervention group (difference at different time points to 24h postpartum 6-10mmHg, p<0.05).<br>Safety: no significant difference. No complications reported from intervention (follow-up to 7 weeks postpartum).                                                                                          |                                 |
| Magann 1994 <sup>60</sup>               | Uterine curettage                 | Nifedipine (oral) or no intervention |                            |                    |             |             | ●           | MAP control: no significant difference between intervention and oral nifedipine; improved in intervention group compared to no intervention (difference at 8-48h postpartum 9-13mmHg, p=0.0017).<br>Safety: no significant difference. No complications/side effects reported from interventions (follow-up to 7 weeks postpartum). |                                 |
| Gocmen 1996 <sup>57</sup>               | Uterine curettage                 | No intervention                      |                            |                    |             |             | ●           | MAP control: improved in intervention group (difference not stated, p=0.01).                                                                                                                                                                                                                                                        |                                 |
| Gomez 2005 <sup>61</sup>                | Uterine curettage                 | No intervention                      |                            |                    |             |             | ●           | MAP control: improved in intervention group (difference not stated, p<0.001).<br>Safety: no significant difference. No complications reported from intervention.                                                                                                                                                                    |                                 |
| Alkan 2006 <sup>62</sup>                | Uterine curettage                 | No intervention                      |                            |                    |             |             | ●           | MAP control: improved in intervention group (difference 6.8mmHg, p<0.05).<br>Safety: No significant difference. No complications reported from intervention.                                                                                                                                                                        |                                 |
| Ragab 2013 <sup>15</sup>                | Uterine curettage                 | No intervention                      | ●                          | ●                  |             |             | ●           | Maternal mortality: no significant difference.<br>Maternal morbidity: no statistical analysis.<br>MAP control: improved in intervention group (difference at 6h postpartum 12.3mmHg, P=0.02, difference at 24h postpartum 9.2mmHg, p=0.01)                                                                                          |                                 |
| Mallapur 2015 <sup>18</sup>             | Uterine curettage                 | No intervention                      |                            |                    |             |             | ●           | MAP control: improved in intervention group (difference at 4h postpartum 7.6mmHg, p<0.001).                                                                                                                                                                                                                                         |                                 |
| <b>ORGANISATION OF CARE (2 studies)</b> |                                   |                                      |                            |                    |             |             |             |                                                                                                                                                                                                                                                                                                                                     |                                 |
| York 1997 <sup>26</sup>                 | Nurse specialist follow-up        | No intervention                      |                            |                    |             |             |             | N/A                                                                                                                                                                                                                                                                                                                                 |                                 |
| Bibbo 2014 <sup>33</sup>                | Specialist postpartum clinic      | No intervention                      |                            |                    |             |             |             | N/A                                                                                                                                                                                                                                                                                                                                 |                                 |



1  
2  
3  
4  
5  
6  
7  
8  
9  
10  
11  
12  
13  
14  
15  
16  
17  
18  
19  
20  
21  
22  
23  
24  
25  
26  
27  
28  
29  
30  
31  
32  
33  
34  
35  
36  
37  
38  
39  
40  
41  
42  
43  
44  
45  
46  
47  
48  
49

**Legend for Tables 2a&b**

● = improved in intervention group; ● = no significant difference; ● = improved in control group; ● = unclear

For primary outcome assessment where there was a significant difference between groups, the magnitude of the difference is reported; where any adverse events or side effects were reported this is presented

For peer review only

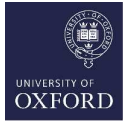

NUFFIELD DEPARTMENT OF  
**PRIMARY CARE**  
HEALTH SCIENCES

**Appendix S1: Management of hypertensive disorders of pregnancy in the postpartum period: A systematic review protocol**

**Registration:** PROSPERO CRD42015015527

[http://www.crd.york.ac.uk/PROSPERO/display\\_record.asp?ID=CRD42015015527#.VL4ZI9KsWcK](http://www.crd.york.ac.uk/PROSPERO/display_record.asp?ID=CRD42015015527#.VL4ZI9KsWcK)

**Authors:** Alexandra E Cairns, Louise Pealing, Nia Roberts, Richard J McManus

**Corresponding author:** Alexandra E Cairns, Nuffield Department of Primary Care Health Sciences, University of Oxford, New Radcliffe House, Radcliffe Observatory Quarter, Woodstock Road, Oxford, OX2 6GG

[alexandra.cairns@phc.ox.ac.uk](mailto:alexandra.cairns@phc.ox.ac.uk)

**Amendments:** Protocol first published 22/12/2014 (version 1.0). Protocol amended (version 2.0 25/03/2015) to include all reporting items from the PRISMA-P 2015 checklist, and PROSPERO registration number.

**Review funder:** NIHR Collaborations for Leadership in Applied Health Research and Care (funding A Cairns' fellowship)

**Review sponsor:** University of Oxford

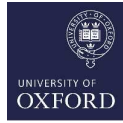**Abstract**

**Rationale:** Hypertensive disorders of pregnancy (gestational hypertension and pre-eclampsia) are a leading cause of direct maternal death in the UK, and affect approximately 5-10% of pregnancies. Hypertensive disorders of pregnancy persist during the postpartum period, and complications can occur during this time.

**Research question:** How should hypertensive disorders of pregnancy be managed in the postnatal period to minimise harm to patients and optimise quality of life?

**Objectives:**

1. Organisation of care: how should blood pressure be monitored in women with hypertensive disorders of pregnancy in the postnatal period?
2. What blood pressure thresholds should be used for anti-hypertensive treatment initiation, adjustment and cessation in the postnatal period?
3. Which anti-hypertensive medication(s) should be used in the postnatal period?
4. What are the benefits and harms of other therapeutic interventions for women with hypertensive disorders of pregnancy in the postnatal period?

**Search strategy:** Medline and nine other electronic databases will be searched for articles published from inception until October 2014 using a search strategy designed to capture all the relevant literature concerning the management of hypertensive disorders of pregnancy in the postnatal period.

**Study eligibility criteria:**

*Population:* postnatal women with gestational hypertension or pre-eclampsia as defined by study

*Intervention:* therapeutic intervention for hypertensive disorders of pregnancy

*Comparisons:* another intervention, placebo or no intervention

*Study design:* RCT, prospective or retrospective cohort study or case-control study

*Publication date:* no restrictions

*Language:* no restrictions

**Data management and extraction:** Two reviewers will first review the titles of articles yielded by the search, and then the abstracts of articles of potential relevance. The full papers of potentially eligible papers will be assessed, and data extracted independently by the two reviewers using a data extraction sheet. Differences in study selection and data extraction will be resolved by discussion.

**Assessment of methodological quality:** This will be done using the Cochrane Collaboration's tool for assessing risk of bias in randomised trials, and for the assessment of bias in cohort and case-control studies we will use the Newcastle-Ottawa quality assessment scales.

**Systematic review registration:** This systematic review is registered with PROSPERO (International prospective register of systematic reviews).

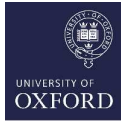

## Rationale

### *Definitions*

The National Institute for Health and Clinical Excellence (NICE) defines gestational hypertension as new-onset raised blood pressure ( $\geq 140/90$ mmHg) beyond 20 weeks gestation. NICE defines pre-eclampsia as new-onset raised blood pressure ( $\geq 140/90$ mmHg) together with new-onset significant proteinuria ( $\geq 300$ mg/24hr), beyond 20 weeks gestation (1).

The International Society for the Study of Hypertension in Pregnancy (ISSHP) defines pre-eclampsia as new-onset raised blood pressure (as defined by NICE) in association with one of new-onset significant proteinuria (as defined by NICE), maternal organ dysfunction or uteroplacental insufficiency (2).

### *Epidemiology*

Hypertensive disorders of pregnancy remain the second commonest direct cause of maternal death in the USA (3). Until recently this has also been the case in the UK (CMACE 2006-8)(4), but the most recent Confidential Enquiry into maternal deaths showed that for the triennium 2009-11, pre-eclampsia and eclampsia was the fourth commonest cause of direct death (behind thrombosis, genital tract sepsis and haemorrhage), with a rate of 0.42 deaths per 100,000 maternities (5).

A recent population-based retrospective study in the United States found the rate of pre-eclampsia to be 3.4%. This study showed a slight, but significant increase, in the rates of both mild, and to a greater extent, severe pre-eclampsia over the period studied (1980-2010) (6).

Reviews of the literature, and national guidelines, quote rates of gestational hypertension between 6% (7) and 15% (8). A retrospective study using data from the National Hospital Discharge Survey in the United States (1987-2004) demonstrated an incidence of 30.6 cases of gestational hypertension per 1000 deliveries in 2003-2004 (3.1%) (9). In a well-designed large randomised controlled trial assessing preventative strategies for hypertensive disorders of pregnancy in low risk, nulliparous women the incidence of gestational hypertension across both groups was 6% (10).

### *Physiology of blood pressure in pregnancy and postpartum*

As a result of a significant decrease in systemic vascular resistance (as early as 5 weeks gestation) (11) there is a decrease in arterial pressures from early in the first trimester. Arterial pressures reach a nadir in the second trimester, and then begin to rise in the third trimester, before reaching near-preconception levels in the postnatal period (12).

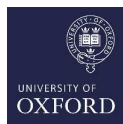

Figure 1: Serial blood pressures before, during and after pregnancy (reproduced from the data of Mahendru et al. 2014) (12)

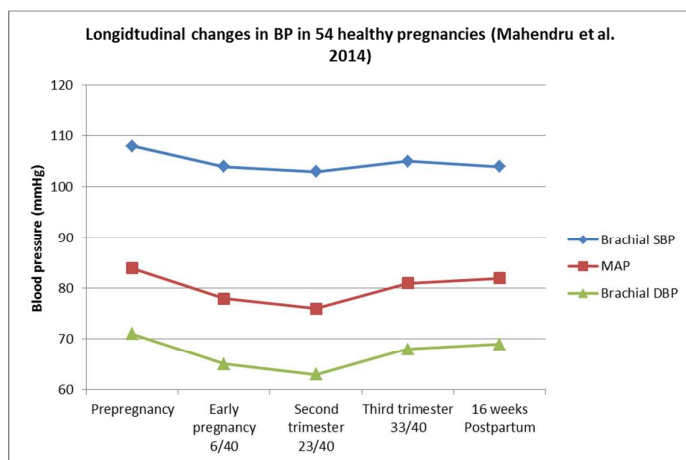

In gestational hypertension and pre-eclampsia the normal pregnancy-induced vasodilatation is reversed. In untreated women with pre-eclampsia significant increases in systemic vascular resistance are seen and result in elevation of blood pressure (13).

#### ***Hypertensive disorders of pregnancy in the postpartum period***

There has been considerable focus on blood pressure control during pregnancy, especially with respect to pregnancy outcome. However, it is recognised that hypertensive disorders of pregnancy do persist during the postpartum period, and that complications can occur during this time. A small retrospective observational study published in 1987 looked at 67 women with moderate-severe pre-eclampsia: there was often an initial decrease in blood pressure after delivery, but this was followed by a rise to hypertensive levels in many women. In 50% of cases the blood pressure was 150/100mmHg or higher on day 5 after birth. The authors recommended continuing blood pressure monitoring and treatment in the postpartum period for women with a diagnosis of pre-eclampsia (14).

Most women with hypertensive disorders of pregnancy will be treatment-free by 3 months postpartum. In women whose blood pressure normalised after delivery the mean time to normalisation in a retrospective cohort study of 62 women was 5.4 weeks (15). This rapidly changing blood pressure, with shifting medication requirement, poses an additional challenge in terms of how best to manage this down-titration.

Approximately one third of eclamptic seizures occur postpartum, and studies suggest that over half of these seizures occur more than 48 hours after birth. Chames et al. (2002) highlight the importance of education of women and clinicians regarding prodromal symptoms of eclampsia in the postnatal



period (16). A case series published in 2005 of patients who sustained a stroke in association with severe pre-eclampsia or eclampsia, showed that more than half (57%) of these strokes occurred in the postpartum period (17).

### ***Current guidelines***

NICE guidelines highlight that very few clinical studies have addressed the management of blood pressure postpartum, and in practice clinical care is typically to continue antepartum antihypertensive medication and monitor blood pressure in the community with a focus on prevention of over-treatment.

NICE recommend frequency of monitoring in the postnatal period for both pre-eclampsia and gestational hypertension. The guidelines also stipulate thresholds for considering increasing or starting anti-hypertensive medication during this period (150/100 mmHg), and for reduction or stopping anti-hypertensive medication (consider at < 140/90 mmHg, and reduce at < 130/80 mmHg) (1).

### **Research question**

How should hypertensive disorders of pregnancy be managed in the postnatal period to minimise harm to patients and optimise quality of life?

### **Objectives**

The aim is to establish what evidence exists to guide the optimal approach to management of gestational hypertension and pre-eclampsia in the postnatal period. We want to address the specific sub-questions:

1. Organisation of care: how should blood pressure be monitored in women with hypertensive disorders of pregnancy in the postnatal period?
2. What blood pressure thresholds should be used for anti-hypertensive treatment initiation, adjustment and cessation in the postnatal period?
3. Which anti-hypertensive medication(s) should be used in the postnatal period?
4. What are the benefits and harms of other therapeutic interventions for women with hypertensive disorders of pregnancy in the postnatal period?

### **Information sources and search strategy**

The systematic review of 'management of hypertensive disorders of pregnancy in the postpartum period' will be conducted in line with the PRISMA statement (18). Completion of a systematic review

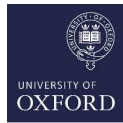

is an iterative process, and it may be that modifications to the original review protocol are required during its conduct.

A search strategy designed to capture all the relevant literature concerning the management of hypertensive disorders of pregnancy in the postnatal period will be developed by an experienced trial search co-ordinator. Potentially relevant studies will be identified following screening of title and abstract of studies captured by the search and full text assessed for suitability.

Resources to be searched from inception to October 2014:

- Medline (Appendix 3) and 9 other electronic databases
- Trial registers (ClinicalTrials.gov; Current Controlled Trials; WHO; PROSPERO)
- Meta Search Engines
- Hand searches of reference lists
- Citation searching on Scopus and Web of Science
- Related articles search on PubMed
- Contact with authors and professional bodies / organisations: Experts in this field will be contacted for their recommendations of potentially relevant citations (19)

## Study eligibility criteria

### **INCLUSION CRITERIA**

**Population:** postnatal women with hypertensive disorders of pregnancy (gestational hypertension or pre-eclampsia).

**Intervention:** therapeutic intervention for management of hypertensive disorders of pregnancy

**Comparisons:** other intervention, placebo or no intervention

**Study design:** randomised controlled trial, cohort study (prospective and retrospective) or case-control study; human studies only

**Publication Date:** no restrictions

**Language:** no restrictions

### **EXCLUSION CRITERIA**

Exclude report / study if **any** exclusion criteria fulfilled:

**Population:** antenatal or intrapartum women with hypertensive disorders of pregnancy; end-organ complications of pre-eclampsia (eclampsia, renal failure, HELLP syndrome)



NUFFIELD DEPARTMENT OF  
**PRIMARY CARE**  
HEALTH SCIENCES

**Intervention:** treatment of HELLP syndrome (haemolysis, elevated liver enzymes and low platelets); prevention or management of eclampsia; prevention of postpartum hypertension; choice of anaesthetic or sedative in pre-eclampsia; observational studies

**Comparisons:** no control group

**Study design:** guidelines, reviews, expert opinions, letters, commentaries, audits, case series and case reports excluded; animal studies

### Data extraction

Two reviewers (AC and LP) will screen the titles and abstracts of articles yielded by the search against the eligibility criteria. Discrepancies will be resolved by consensus before determining the list of full papers for review. The reports will be screened independently by the two reviewers, and discrepancies will be resolved by discussion before deciding which papers to include in the review.

Data from included studies will be extracted independently by the two reviewers using a piloted and standardised data extraction sheet. Differences in data extraction will be resolved by discussion.

In the event that there is more than one report published about a single study: the reports will be reviewed separately but the data from that study grouped in our analysis, and the primary reference will be used.

In the event that data is missing from a report (for example the sole publication is a conference abstract) we will contact the authors directly to request further detail.

The study characteristics (study size, population, setting, study design, methodology, intervention, controls if applicable, outcome measures, and follow up period) will be recorded and reported.

### Data synthesis

The data extracted will be aggregate.

Due to the heterogeneous nature of the outcomes reported in these studies a narrative synthesis is planned.

For trials where the population study is peripartum (i.e. a mixture of antepartum, intrapartum and postpartum) we will extract the data for the postpartum women and analyse this. If this is not feasible from the reported data then we will contact the study authors to request the data for this subgroup.

### Outcomes

The results of all clinically relevant outcomes in hypertensive disorders of pregnancy that would be important to clinicians and patients will be extracted and reported.

The main outcomes we are interested in are listed in table 1 below:



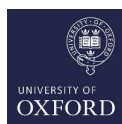

Table 1

|                             | Outcome measures                                                                                                                                                                                                                                                                                                                                 | Timing                                                                                      |
|-----------------------------|--------------------------------------------------------------------------------------------------------------------------------------------------------------------------------------------------------------------------------------------------------------------------------------------------------------------------------------------------|---------------------------------------------------------------------------------------------|
| <b>Primary outcome(s)</b>   | Maternal mortality<br>Major maternal morbidity (ischaemic stroke, intracranial haemorrhage, eclamptic seizure)<br>Systolic blood pressure control<br>Diastolic blood pressure control<br>Mean arterial pressure control                                                                                                                          | Direct maternal deaths upto day 42 postpartum; later maternal deaths upto 1 year postpartum |
| <b>Secondary outcome(s)</b> | Critical care admission<br>Postnatal readmission to secondary care<br>Length of hospital stay following delivery<br>Anti-hypertensive medication requirement<br>Maternal side effects of intervention<br>Development of pre-eclampsia with severe features<br>Postnatal complication requiring intervention<br>Urine output<br>Laboratory values |                                                                                             |

### Assessment of methodological quality

We will assess the risk of bias in each study. For randomised trials this will be done using the Cochrane Collaboration's tool for assessing risk of bias in randomised trials (Appendix 1, Table 2) (20). For each study the key domains will be identified, and then an overall assessment of bias within each trial made, according to the guidance published by the Cochrane Collaboration (Appendix 1, Table 2).

For the assessment of bias in cohort and case-control studies we will use the Newcastle-Ottawa quality assessment scales (Appendix 2, Tables 4 and 5) (21).

We will make a global assessment of bias across trials, based on the guidance from the Cochrane Collaboration (Appendix 1, Table 3):

- EITHER Most information is from trials at low risk of bias;
- OR most information is from trials at low or unclear risk of bias;
- OR the proportion of information from trials at high risk of bias is sufficient to affect the interpretation of results

**Discussion**

A Cochrane Review (2013) addresses the question of 'prevention and treatment of postpartum hypertension'. This only includes randomised controlled trials (9 in total), and does not address the issue of monitoring blood pressure during this period (22). Given the paucity of evidence cited in this area we believe there is a place for a review looking at all available evidence for the optimal approach to management of hypertensive disorders of pregnancy in the postpartum period.

**Conflicts of interest**

Neither AC nor LP have any conflicts of interest.

For peer review only

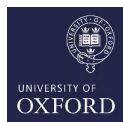

## References

1. National Institute for Health and Care Excellence. NICE Clinical Guideline 107: Hypertension in pregnancy: the management of hypertensive disorders during pregnancy. 2011.
2. Tranquilli AL, Dekker G, Magee L, Roberts J, Sibai BM, Steyn W, et al. The classification, diagnosis and management of the hypertensive disorders of pregnancy: A revised statement from the ISSHP. *Pregnancy Hypertension: An International Journal of Women's Cardiovascular Health*. 2014;4(2):97-104.
3. American College of Obstetricians and Gynecologists. Diagnosis and management of preeclampsia and eclampsia. *ACOG Practice Bulletin*. ACOG Practice Bulletin No. 33: 2002.
4. Cantwell R, Clutton-Brock T, Cooper G, Dawson A, Drife J, Garrod D, et al. Saving Mothers' Lives: Reviewing maternal deaths to make motherhood safer: 2006-2008. The Eighth Report of the Confidential Enquiries into Maternal Deaths in the United Kingdom. *BJOG : an international journal of obstetrics and gynaecology*. 2011;118 Suppl 1:1-203.
5. Knight M, Kenyon S, Brocklehurst P, Neilson J, Shakespeare J, Kurinczuk J. *Saving Lives, Improving Mothers' Care (MBRRACE-UK)*. 2014.
6. Ananth CV, Keyes KM, Wapner RJ. Pre-eclampsia rates in the United States, 1980-2010: age-period-cohort analysis. *Bmj*. 2013;347:f6564.
7. Yoder SR, Thornburg LL, Bisognano JD. Hypertension in pregnancy and women of childbearing age. *The American journal of medicine*. 2009;122(10):890-5.
8. National Institute for Health and Care Excellence. NICE Clinical Guideline 107: Hypertension in pregnancy: Costing report. Implementing NICE guidance. 2010.
9. Wallis AB, Saftlas AF, Hsia J, Atrash HK. Secular trends in the rates of preeclampsia, eclampsia, and gestational hypertension, United States, 1987-2004. *American journal of hypertension*. 2008;21(5):521-6.
10. Sibai BM, Caritis SN, Thom E, Klebanoff M, McNellis D, Rocco L, et al. Prevention of preeclampsia with low-dose aspirin in healthy, nulliparous pregnant women. The National Institute of Child Health and Human Development Network of Maternal-Fetal Medicine Units. *The New England journal of medicine*. 1993;329(17):1213-8.
11. Chapman AB, Abraham WT, Zamudio S, Coffin C, Merouani A, Young D, et al. Temporal relationships between hormonal and hemodynamic changes in early human pregnancy. *Kidney international*. 1998;54(6):2056-63.
12. Mahendru AA, Everett TR, Wilkinson IB, Lees CC, McEniery CM. A longitudinal study of maternal cardiovascular function from preconception to the postpartum period. *Journal of hypertension*. 2014;32(4):849-56.
13. Visser W, Wallenburg HC. Central hemodynamic observations in untreated preeclamptic patients. *Hypertension*. 1991;17(6 Pt 2):1072-7.
14. Walters BN, Walters T. Hypertension in the puerperium. *Lancet*. 1987;2(8554):330.
15. Podymow T, August P. Postpartum course of gestational hypertension and preeclampsia. *Hypertension in pregnancy*. 2010;29(3):294-300.
16. Chames MC, Livingston JC, Ivester TS, Barton JR, Sibai BM. Late postpartum eclampsia: a preventable disease? *American journal of obstetrics and gynecology*. 2002;186(6):1174-7.
17. Martin JN, Jr., Thigpen BD, Moore RC, Rose CH, Cushman J, May W. Stroke and severe preeclampsia and eclampsia: a paradigm shift focusing on systolic blood pressure. *Obstetrics and gynecology*. 2005;105(2):246-54.
18. Moher D, Liberati A, Tetzlaff J, Altman DG, Group P. Preferred reporting items for systematic reviews and meta-analyses: the PRISMA statement. *PLoS medicine*. 2009;6(7):e1000097.
19. McManus RJ, Wilson S, Delaney BC, Fitzmaurice DA, Hyde CJ, Tobias RS, et al. Review of the usefulness of contacting other experts when conducting a literature search for systematic reviews. *Bmj*. 1998;317(7172):1562-3.

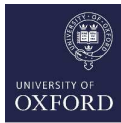

NUFFIELD DEPARTMENT OF  
**PRIMARY CARE**  
HEALTH SCIENCES

- 1  
2  
3  
4  
5  
6  
7  
8  
9  
10  
11  
12  
13  
14  
15  
16  
17  
18  
19  
20  
21  
22  
23  
24  
25  
26  
27  
28  
29  
30  
31  
32  
33  
34  
35  
36  
37  
38  
39  
40  
41  
42  
43  
44  
45  
46  
47  
48  
49  
50  
51  
52  
53  
54  
55  
56  
57  
58  
59  
60
20. Higgins JPT, Altman DG, Gøtzsche PC, Jüni P, Moher D, Oxman AD, et al. The Cochrane Collaboration's tool for assessing risk of bias in randomised trials. *BMJ* 2011;363:f759. doi:10.1136/bmj.f759.
21. Wells GA, Shea B, O'Connell D, J. P, V. W, M. L, et al. The Newcastle-Ottawa Scale (NOS) for assessing the quality of nonrandomised studies in meta-analyses. *BMJ* 2001;322:71-6.
22. Magee L, von Dadelszen P. Prevention and treatment of postpartum hypertension. *The Cochrane database of systematic reviews*. 2013;4:CD004351.

For peer review only

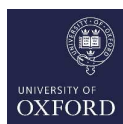

## Appendix 1

**Table 2:** Cochrane Collaboration's tool for assessing risk of bias (*adapted from Higgins and Altman*)(20)

| Bias domain      | Source of bias                          | Support for judgment                                                                                                                                                                                                                                                                                                                                                    | Review authors' judgment (assess as low, unclear or high risk of bias)                                             |
|------------------|-----------------------------------------|-------------------------------------------------------------------------------------------------------------------------------------------------------------------------------------------------------------------------------------------------------------------------------------------------------------------------------------------------------------------------|--------------------------------------------------------------------------------------------------------------------|
| Selection bias   | Random sequence generation              | Describe the method used to generate the allocation sequence in sufficient detail to allow an assessment of whether it should produce comparable groups                                                                                                                                                                                                                 | Selection bias (biased allocation to interventions) due to inadequate generation of a randomised sequence          |
|                  | Allocation concealment                  | Describe the method used to conceal the allocation sequence in sufficient detail to determine whether intervention allocations could have been foreseen before or during enrolment                                                                                                                                                                                      | Selection bias (biased allocation to interventions) due to inadequate concealment of allocations before assignment |
| Performance bias | Blinding of participants and personnel* | Describe all measures used, if any, to blind trial participants and researchers from knowledge of which intervention a participant received. Provide any information relating to whether the intended blinding was effective                                                                                                                                            | Performance bias due to knowledge of the allocated interventions by participants and personnel during the study    |
| Detection bias   | Blinding of outcome assessment*         | Describe all measures used, if any, to blind outcome assessment from knowledge of which intervention a participant received. Provide any information relating to whether the intended blinding was effective                                                                                                                                                            | Detection bias due to knowledge of the allocated interventions by outcome assessment                               |
| Attrition bias   | Incomplete outcome data*                | Describe the completeness of outcome data for each main outcome, including attrition and exclusions from the analysis. State whether attrition and exclusions were reported, the numbers in each intervention group (compared with total randomised participants), reasons for attrition or exclusions where reported, and any re-inclusions in analyses for the review | Attrition bias due to amount, nature, or handling of incomplete outcome data                                       |
| Reporting bias   | Selective reporting                     | State how selective outcome reporting was examined and what                                                                                                                                                                                                                                                                                                             | Reporting bias due to selective                                                                                    |



|                   |                        |                                                         |                                |
|-------------------|------------------------|---------------------------------------------------------|--------------------------------|
|                   |                        | was found                                               | outcome reporting              |
|                   | Anything else, ideally | State any important concerns                            | Bias due to                    |
| <b>Other bias</b> | Pre-specified          | about bias not covered in the other domains in the tool | problems not covered elsewhere |

\*Assessments should be made for each main outcome or class of outcomes.

**Table 3:** Approach to formulating summary assessments of risk of bias for each important outcome (across domains) within and across trials (*adapted from Higgins and Altman*)(20)

| Risk of bias                | Interpretation                                               | Within a trial                                  | Across trials                                                                                                        |
|-----------------------------|--------------------------------------------------------------|-------------------------------------------------|----------------------------------------------------------------------------------------------------------------------|
| <b>Low risk of bias</b>     | Bias, if present, is unlikely to alter the results seriously | Low risk of bias for all key domains            | Most information is from trials at low risk of bias                                                                  |
| <b>Unclear risk of bias</b> | A risk of bias that raises some doubt about the results      | Low or unclear risk of bias for all key domains | Most information is from trials at low or unclear risk of bias                                                       |
| <b>High risk of bias</b>    | Bias may alter the results seriously                         | High risk of bias for one or more key domains   | The proportion of information from trials at high risk of bias is sufficient to affect the interpretation of results |



## Appendix 2

**Table 4: Newcastle-Ottawa quality assessment scale case control studies(21)**

A study can be awarded a maximum of one star for each numbered item within the Selection and Exposure categories. A maximum of two stars can be given for Comparability.

|                      |                                                                            |                                                                                                                                                                                                                                      |
|----------------------|----------------------------------------------------------------------------|--------------------------------------------------------------------------------------------------------------------------------------------------------------------------------------------------------------------------------------|
| <b>Selection</b>     | Is the case definition adequate?                                           | a) Yes, with independent validation *<br>b) Yes, e.g. record linkage or based on self-reports<br>c) No description                                                                                                                   |
|                      | Representativeness of the cases                                            | a) Consecutive or obviously representative series of cases *<br>b) Potential for selection biases not stated                                                                                                                         |
|                      | Selection of controls                                                      | a) Community controls *<br>b) Hospital controls<br>c) No description                                                                                                                                                                 |
|                      | Definition of controls                                                     | a) No history of disease (endpoint) *<br>b) No description of source                                                                                                                                                                 |
| <b>Comparability</b> | Comparability of cases and controls on the basis of the design or analysis | a) Study controls for <<_>> (select the most important factor) *<br>b) Study controls for any additional factor *                                                                                                                    |
| <b>Exposure</b>      | Ascertainment of exposure                                                  | a) Secure records (e.g. surgical records) *<br>b) Structured interview where blind to case/control status *<br>c) Interview not blinded to case/control status<br>d) Written self-report or medical record only<br>e) No description |
|                      | Same method of ascertainment for cases and controls                        | a) Yes *<br>b) No                                                                                                                                                                                                                    |
|                      | Non-response rate                                                          | a) Same rate for both groups *<br>b) Non-respondents described<br>c) Rate different and no designation                                                                                                                               |

**Table 5: Newcastle-Ottawa quality assessment scale cohort studies(21)**

A study can be awarded a maximum of one star for each numbered item within the Selection and Outcome categories. A maximum of two stars can be given for Comparability.

|                  |                                          |                                                                                                                                                                                                                                                                        |
|------------------|------------------------------------------|------------------------------------------------------------------------------------------------------------------------------------------------------------------------------------------------------------------------------------------------------------------------|
| <b>Selection</b> | Representativeness of the exposed cohort | a) Truly representative of the average <<_>> (describe) in the community *<br>b) Somewhat representative of the average <<_>> (describe) in the community ☐<br>c) Selected group of users e.g. nurses, volunteers<br>d) No description of the derivation of the cohort |
|                  | Selection of the non-exposed cohort      | a) Drawn from the same community as the exposed cohort *<br>b) Drawn from a different source<br>c) No description of the derivation of the non-exposed cohort                                                                                                          |
|                  | Ascertainment of exposure                | a) Secure record (e.g. surgical records) *<br>b) Structured interview *<br>c) Written self-report<br>d) No description                                                                                                                                                 |



NUFFIELD DEPARTMENT OF  
**PRIMARY CARE**  
 HEALTH SCIENCES

|                      |                                                                              |                                                                                                                                                                                                                                                                                                              |
|----------------------|------------------------------------------------------------------------------|--------------------------------------------------------------------------------------------------------------------------------------------------------------------------------------------------------------------------------------------------------------------------------------------------------------|
|                      | Demonstration that the outcome of interest was not present at start of study | a) Yes *<br>b) No                                                                                                                                                                                                                                                                                            |
| <b>Comparability</b> | Comparability of cases and controls on the basis of the design or analysis   | a) Study controls for <<_>> (select the post important factor) *<br>b) Study controls for any additional factor *                                                                                                                                                                                            |
| <b>Outcome</b>       | Assessment of outcome                                                        | a) Independent blind assessment *<br>b) Record linkage *<br>c) Self-report<br>d) No description                                                                                                                                                                                                              |
|                      | Was follow-up long enough for outcomes to occur                              | a) Yes (select an adequate follow up period for outcome of interest) *<br>b) No                                                                                                                                                                                                                              |
|                      | Adequacy of follow-up of cohorts                                             | a) Complete follow-up – all subjects accounted for *<br>b) Subjects lost to follow-up unlikely to introduce bias: >_ % (select an adequate %) follow-up rate, or description provided of those lost) *<br>c) Follow-up rate < _ % (select an adequate %) and no description of those lost<br>d) No statement |





### Appendix 3: Medline search strategy

| # ▼ | Searches                                                                                                                                                                                                                                           | Results |
|-----|----------------------------------------------------------------------------------------------------------------------------------------------------------------------------------------------------------------------------------------------------|---------|
| 1   | Pregnancy/ and Hypertension/                                                                                                                                                                                                                       | 9226    |
| 2   | exp Hypertension, Pregnancy-Induced/                                                                                                                                                                                                               | 29022   |
| 3   | ((pregnan* or gestation* or maternal or prenatal or pre-natal or antenatal or antenatal or antepart* or ante-part* or obstetric*) and (hypertens* or blood pressure or bp or dbp or sbp or diastolic or systolic)).ti.                             | 6787    |
| 4   | ((pregnan* or gestation* or maternal or prenatal or pre-natal or antenatal or antenatal or antepart* or ante-part* or obstetric*) adj3 (hypertens* or blood pressure or bp or dbp or sbp or diastolic or systolic)).ti,ab.                         | 12434   |
| 5   | (eclamp* or preeclamp* or pre-eclamp* or hellp).ti,ab.                                                                                                                                                                                             | 25194   |
| 6   | 1 or 2 or 3 or 4 or 5                                                                                                                                                                                                                              | 46611   |
| 7   | Postnatal Care/                                                                                                                                                                                                                                    | 4044    |
| 8   | Aftercare/                                                                                                                                                                                                                                         | 6684    |
| 9   | Postpartum Period/ and Maternal Health Services/                                                                                                                                                                                                   | 126     |
| 10  | exp Puerperal Disorders/ and Maternal Health Services/                                                                                                                                                                                             | 196     |
| 11  | Postpartum period/ and (exp Antihypertensive agents/ or exp calcium channel blockers/ or exp Angiotensin-Converting Enzyme Inhibitors/ or exp Adrenergic beta-Antagonists/ or exp Diuretics/)                                                      | 187     |
| 12  | exp Puerperal disorders/ and (exp Antihypertensive agents/ or exp calcium channel blockers/ or exp Angiotensin-Converting Enzyme Inhibitors/ or exp Adrenergic beta-Antagonists/ or exp Diuretics/)                                                | 237     |
| 13  | Postpartum period/ and exp Curettage/                                                                                                                                                                                                              | 30      |
| 14  | exp Puerperal disorders/ and exp Curettage/                                                                                                                                                                                                        | 118     |
| 15  | Postpartum period/ and hypertension/dt, th                                                                                                                                                                                                         | 33      |
| 16  | exp Puerperal disorders/ and hypertension/dt, th                                                                                                                                                                                                   | 54      |
| 17  | exp Puerperal disorders/dt, th                                                                                                                                                                                                                     | 6408    |
| 18  | ((postnatal or post-natal or postpart* or post-part* or puerper*) adj5 (care or healthcare or service* or program* or scheme* or intervention*)).ti,ab.                                                                                            | 4407    |
| 19  | ((postnatal or post-natal or postpart* or post-part* or puerper*) adj5 (clinic? or unit? or visit* or referral? or appointment?)).ti,ab.                                                                                                           | 1491    |
| 20  | ((postnatal or post-natal or postpart* or post-part* or puerper*) adj5 (manage* or treat* or therap* or medication? or recovery)).ti,ab.                                                                                                           | 7287    |
| 21  | ((postnatal or post-natal or postpart* or post-part* or puerper*) adj5 (antihypertens* or anti-hypertens* or calcium channel block* or beta block* or b block* or ace inhibitor* or angiotensin converting enzyme inhibitor* or diuretic*)).ti,ab. | 41      |
| 22  | ((postnatal or post-natal or postpart* or post-part* or puerper*) adj5 (evaluat* or assess* or screen* or diagnos* or monitor* or follow up or supervis*)).ti,ab.                                                                                  | 7562    |
| 23  | ((postnatal or post-natal or postpart* or post-part* or puerper*) adj5 curet*).ti,ab.                                                                                                                                                              | 82      |
| 24  | (postnatal or post-natal or postpart* or post-part* or puerper*).ti.                                                                                                                                                                               | 41491   |
| 25  | 7 or 8 or 9 or 10 or 11 or 12 or 13 or 14 or 15 or 16 or 17 or 18 or 19 or 20 or 21 or 22 or 23 or 24                                                                                                                                              | 64775   |

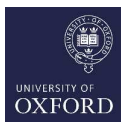

NUFFIELD DEPARTMENT OF  
**PRIMARY CARE**  
 HEALTH SCIENCES

|    |                                                                                                                                                                                                                                             |         |
|----|---------------------------------------------------------------------------------------------------------------------------------------------------------------------------------------------------------------------------------------------|---------|
| 26 | 6 and 25                                                                                                                                                                                                                                    | 1896    |
| 27 | ((postnatal or post-natal or postpart* or post-part* or puerper*) and (hypertens* or blood pressure)).ti.                                                                                                                                   | 270     |
| 28 | 26 or 27                                                                                                                                                                                                                                    | 1990    |
| 29 | exp animals/ not humans.sh.                                                                                                                                                                                                                 | 4079856 |
| 30 | (rat or rats or rodent? or mice or mouse or cow or cows or cattle or calf or calves or ewe? or sheep or goat or ruminant? or pig or pigs or minipig? or chicken? or horse or horses or murine or bovine or ovine or porcine or animal?).ti. | 1682619 |
| 31 | 29 or 30                                                                                                                                                                                                                                    | 4373527 |
| 32 | 28 not 31                                                                                                                                                                                                                                   | 1881    |

For peer review only

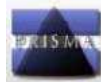

## Appendix S2: PRISMA 2009 Checklist

1  
2  
3  
4  
5  
6  
7  
8  
9  
10  
11  
12  
13  
14  
15  
16  
17  
18  
19  
20  
21  
22  
23  
24  
25  
26  
27  
28  
29  
30  
31  
32  
33  
34  
35  
36  
37  
38  
39  
40  
41  
42  
43  
44  
45  
46  
47  
48  
49

| Section/topic                      | #  | Checklist item                                                                                                                                                                                                                                                                                              | Reported on page # |
|------------------------------------|----|-------------------------------------------------------------------------------------------------------------------------------------------------------------------------------------------------------------------------------------------------------------------------------------------------------------|--------------------|
| <b>TITLE</b>                       |    |                                                                                                                                                                                                                                                                                                             |                    |
| Title                              | 1  | Identify the report as a systematic review, meta-analysis, or both.                                                                                                                                                                                                                                         | 1                  |
| <b>ABSTRACT</b>                    |    |                                                                                                                                                                                                                                                                                                             |                    |
| Structured summary                 | 2  | Provide a structured summary including, as applicable: background; objectives; data sources; study eligibility criteria, participants, and interventions; study appraisal and synthesis methods; results; limitations; conclusions and implications of key findings; systematic review registration number. | 2                  |
| <b>INTRODUCTION</b>                |    |                                                                                                                                                                                                                                                                                                             |                    |
| Rationale                          | 3  | Describe the rationale for the review in the context of what is already known.                                                                                                                                                                                                                              | 5                  |
| Objectives                         | 4  | Provide an explicit statement of questions being addressed with reference to participants, interventions, comparisons, outcomes, and study design (PICOS).                                                                                                                                                  | 5-6                |
| <b>METHODS</b>                     |    |                                                                                                                                                                                                                                                                                                             |                    |
| Protocol and registration          | 5  | Indicate if a review protocol exists, if and where it can be accessed (e.g., Web address), and, if available, provide registration information including registration number.                                                                                                                               | 6                  |
| Eligibility criteria               | 6  | Specify study characteristics (e.g., PICOS, length of follow-up) and report characteristics (e.g., years considered, language, publication status) used as criteria for eligibility, giving rationale.                                                                                                      | 6                  |
| Information sources                | 7  | Describe all information sources (e.g., databases with dates of coverage, contact with study authors to identify additional studies) in the search and date last searched.                                                                                                                                  | 6                  |
| Search                             | 8  | Present full electronic search strategy for at least one database, including any limits used, such that it could be repeated.                                                                                                                                                                               | Appendix S1        |
| Study selection                    | 9  | State the process for selecting studies (i.e., screening, eligibility, included in systematic review, and, if applicable, included in the meta-analysis).                                                                                                                                                   | 6                  |
| Data collection process            | 10 | Describe method of data extraction from reports (e.g., piloted forms, independently, in duplicate) and any processes for obtaining and confirming data from investigators.                                                                                                                                  | 6-7                |
| Data items                         | 11 | List and define all variables for which data were sought (e.g., PICOS, funding sources) and any assumptions and simplifications made.                                                                                                                                                                       | 6-7; Table 1       |
| Risk of bias in individual studies | 12 | Describe methods used for assessing risk of bias of individual studies (including specification of whether this was done at the study or outcome level), and how this information is to be used in any data synthesis.                                                                                      | 7                  |
| Summary measures                   | 13 | State the principal summary measures (e.g., risk ratio, difference in means).                                                                                                                                                                                                                               | 6-7 (narrative)    |
| Synthesis of results               | 14 | Describe the methods of handling data and combining results of studies, if done, including measures of consistency (e.g., $I^2$ ) for each meta-analysis.                                                                                                                                                   | N/A                |

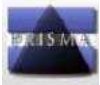

## Appendix S2: PRISMA 2009 Checklist

Page 1 of 2

| Section/topic                 | #  | Checklist item                                                                                                                                                                                           | Reported on page #             |
|-------------------------------|----|----------------------------------------------------------------------------------------------------------------------------------------------------------------------------------------------------------|--------------------------------|
| Risk of bias across studies   | 15 | Specify any assessment of risk of bias that may affect the cumulative evidence (e.g., publication bias, selective reporting within studies).                                                             | 7                              |
| Additional analyses           | 16 | Describe methods of additional analyses (e.g., sensitivity or subgroup analyses, meta-regression), if done, indicating which were pre-specified.                                                         | N/A                            |
| <b>RESULTS</b>                |    |                                                                                                                                                                                                          |                                |
| Study selection               | 17 | Give numbers of studies screened, assessed for eligibility, and included in the review, with reasons for exclusions at each stage, ideally with a flow diagram.                                          | 7; Figure 1                    |
| Study characteristics         | 18 | For each study, present characteristics for which data were extracted (e.g., study size, PICOS, follow-up period) and provide the citations.                                                             | 7; Appendix S4                 |
| Risk of bias within studies   | 19 | Present data on risk of bias of each study and, if available, any outcome level assessment (see item 12).                                                                                                | 7-8; Appendix S6               |
| Results of individual studies | 20 | For all outcomes considered (benefits or harms), present, for each study: (a) simple summary data for each intervention group (b) effect estimates and confidence intervals, ideally with a forest plot. | 8-13; Tables 2a+b; Appendix S5 |
| Synthesis of results          | 21 | Present results of each meta-analysis done, including confidence intervals and measures of consistency.                                                                                                  | N/A                            |
| Risk of bias across studies   | 22 | Present results of any assessment of risk of bias across studies (see Item 15).                                                                                                                          | 7-8; Appendix S6               |
| Additional analysis           | 23 | Give results of additional analyses, if done (e.g., sensitivity or subgroup analyses, meta-regression [see Item 16]).                                                                                    | N/A                            |
| <b>DISCUSSION</b>             |    |                                                                                                                                                                                                          |                                |
| Summary of evidence           | 24 | Summarize the main findings including the strength of evidence for each main outcome; consider their relevance to key groups (e.g., healthcare providers, users, and policy makers).                     | 13-16                          |
| Limitations                   | 25 | Discuss limitations at study and outcome level (e.g., risk of bias), and at review-level (e.g., incomplete retrieval of identified research, reporting bias).                                            | 14-15                          |
| Conclusions                   | 26 | Provide a general interpretation of the results in the context of other evidence, and implications for future research.                                                                                  | 15-16                          |
| <b>FUNDING</b>                |    |                                                                                                                                                                                                          |                                |
| Funding                       | 27 | Describe sources of funding for the systematic review and other support (e.g., supply of data); role of funders for the systematic review.                                                               | 17                             |

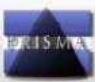

**Appendix S2: PRISMA 2009 Checklist**

1  
2  
3  
4  
5  
6  
7  
8  
9  
10  
11  
12  
13  
14  
15  
16  
17  
18  
19  
20  
21  
22  
23  
24  
25  
26  
27  
28  
29  
30  
31  
32  
33  
34  
35  
36  
37  
38  
39  
40  
41  
42  
43  
44  
45  
46  
47  
48  
49

*From:* Moher D, Liberati A, Tetzlaff J, Altman DG, The PRISMA Group (2009). Preferred Reporting Items for Systematic Reviews and Meta-Analyses: The PRISMA Statement. PLoS Med 6(7): e1000097. doi:10.1371/journal.pmed1000097

For more information, visit: [www.prisma-statement.org](http://www.prisma-statement.org).

Page 2 of 2

For peer review only

**Appendix S3: Primary reasons for article exclusion (n = 35)**

|                  | Population not postnatal                                | Intervention not targeted at management of BP                                                               | No control group                                                                                                                                                                                                                                                                                                                                                | Study design                                                     |
|------------------|---------------------------------------------------------|-------------------------------------------------------------------------------------------------------------|-----------------------------------------------------------------------------------------------------------------------------------------------------------------------------------------------------------------------------------------------------------------------------------------------------------------------------------------------------------------|------------------------------------------------------------------|
| <b>n</b>         | 4                                                       | 6                                                                                                           | 22                                                                                                                                                                                                                                                                                                                                                              | 3                                                                |
| <b>Study IDs</b> | Berks 2015<br>Gerard 1983<br>Scardo 1999<br>Wacker 2006 | Chandrasekaran 2015<br>Ehrenberg 2004<br>Ehrenberg 2006<br>Ossada 2016<br>Wasden 2012<br>Younger-Lewis 2016 | Al Waili 2004<br>Alicino 1962<br>Barton 1991<br>Belfort 1988<br>Belfort 1992<br>Bittle 2014<br>Bosio 2003<br>Correa 1982<br>Dulitzky 1987<br>Hirshberg 2016<br>Hirshberg 2017<br>Hunter 1961<br>Onishi 2015<br>Robinson 1964<br>Rodriguez 2012<br>Saghir<br>Smith 2005<br>Sukerman-Voldman 1985<br>Taslimi 1991<br>Tkacheva 2006<br>Wacker 1994<br>Walters 1984 | Editor, Emergency Medicine 1990<br>Cursino 2015<br>Gallegos 1961 |

## APPENDIX S4: Main characteristics of included studies (n=39)

| Study ID                                         | Methods                    |                                                         | Participants |                          |                            | Intervention        |                                                                                                                               | Outcomes                                                                                                                          |                                                                        |                                                                                                                                                                                                                                                                                                                                                                                      |
|--------------------------------------------------|----------------------------|---------------------------------------------------------|--------------|--------------------------|----------------------------|---------------------|-------------------------------------------------------------------------------------------------------------------------------|-----------------------------------------------------------------------------------------------------------------------------------|------------------------------------------------------------------------|--------------------------------------------------------------------------------------------------------------------------------------------------------------------------------------------------------------------------------------------------------------------------------------------------------------------------------------------------------------------------------------|
|                                                  | Study design               | Duration                                                | n*           | Age (yr) <sup>†</sup>    | Setting                    | Country             | Intervention                                                                                                                  | Control(s)                                                                                                                        | Primary                                                                | Secondary                                                                                                                                                                                                                                                                                                                                                                            |
| <b>ANTIHYPERTENSIVE MEDICATIONS (18 studies)</b> |                            |                                                         |              |                          |                            |                     |                                                                                                                               |                                                                                                                                   |                                                                        |                                                                                                                                                                                                                                                                                                                                                                                      |
| <b>Calcium channel blockers</b>                  |                            |                                                         |              |                          |                            |                     |                                                                                                                               |                                                                                                                                   |                                                                        |                                                                                                                                                                                                                                                                                                                                                                                      |
| Barton 1990 <sup>32</sup>                        | RCT                        | Enrolled immediately after birth<br>Follow-up (F/U) 48h | 31           | 24.0<br>26.3             | Tertiary referral hospital | USA                 | Nifedipine 10mg oral (PO) 4-hourly for 48 hours                                                                               | Placebo                                                                                                                           | Mean arterial pressure (MAP)                                           | Systolic blood pressure (SBP )<br>Diastolic blood pressure (DBP)<br>Maternal heart rate<br>Antihypertensive medication requirement<br>Urine output<br>Laboratory values (urine protein, creatinine clearance, haematocrit (HCT), platelets (plt), alanine aminotransferase (ALT), blood urea nitrogen (BUN), creatinine, serum electrolytes, uric acid (UA), urine specific gravity) |
| Vermillion 1999 <sup>21</sup>                    | RCT                        | Enrolled within 24h of birth<br>F/U 3 – 24h             | 21           | 27.2±7.3<br>27.0±6.4     | Tertiary referral hospital | USA                 | Nifedipine 10mg stat PO then 20mg every 20 minutes until BP <160/110 or max 5 doses + intravenous (IV) placebo                | Labetalol 20mg, then 40mg, then 80mg IV every 20 minutes until BP <160/110mmHg or max 5 doses (300mg) + oral placebo              | SBP + DBP                                                              | SBP (failure to achieve target <160mmHg)<br>DBP (failure to achieve target <110mmHg)<br>Maternal side effects<br>Antihypertensive medication requirement<br>Urine output                                                                                                                                                                                                             |
| Sayin 2005 <sup>34</sup>                         | RCT                        | Enrolled 24h after birth<br>F/U 72h after BP controlled | 83           | 17-41                    | Tertiary referral hospital | Turkey <sup>‡</sup> | Nifedipine 10mg PO QDS until BP <150/100mmHg for 48h                                                                          | Methyldopa 250mg PO TDS                                                                                                           | SBP + DBP                                                              | Maternal mortality<br>Antihypertensive medication requirement<br>Hypertensive retinopathy                                                                                                                                                                                                                                                                                            |
| <b>Vasodilators</b>                              |                            |                                                         |              |                          |                            |                     |                                                                                                                               |                                                                                                                                   |                                                                        |                                                                                                                                                                                                                                                                                                                                                                                      |
| Palot 1979 <sup>36</sup>                         | Retrospective cohort study | Not specified                                           | 54           | 24.5 (17-37)             | Not specified              | France <sup>†</sup> | Hydralazine 5mg IV stat then 1% IV infusion, furosemide 20mg IV stat and 30% hypertonic glucose                               | (1) Clonidine IV and furosemide 20mg IV stat<br>OR<br>(2) Non-systematic treatment                                                | Maternal morbidity (development of pre-eclampsia with severe features) | BP (time to resolution of hypertension)                                                                                                                                                                                                                                                                                                                                              |
| Griffis 1989 <sup>38</sup><br>39                 | RCT                        | F/U 24h                                                 | 26           | Not specified            | Tertiary referral hospital | USA                 | Hydralazine 20mg IM QDS for 24h                                                                                               | Methyldopa 250mg IV QDS x 24h                                                                                                     | MAP                                                                    | Maternal side effects<br>Antihypertensive medication requirement<br>Urine output (time to diuresis)                                                                                                                                                                                                                                                                                  |
| Walls Rodriguez 1991 <sup>40</sup>               | RCT                        | Not specified                                           | 38           | 16-40                    | Not specified              | Mexico <sup>†</sup> | Hydralazine 40mg PO QDS, duration not specified + if DBP > 110 PRN nifedipine 10mg SL every 30 minutes, to maximum of 3 doses | Nifedipine 10mg sub-lingual (SL) every 30 minutes if DBP ≥110mmHg                                                                 | SBP                                                                    | DBP<br>Antihypertensive medication requirement                                                                                                                                                                                                                                                                                                                                       |
| Begum 2002 <sup>17</sup>                         | Quasi-randomised trial     | Not specified                                           | 15           | 24.09±4.93<br>22.72±5.08 | Tertiary referral hospital | Bangladesh          | Hydralazine 5mg then 2mg IV bolus every 15 minutes until DBP 90-95mmHg                                                        | Hydralazine 20mg/200ml normal saline IV infusion; 10 drops per min, increased by 5 drops at 15 min intervals; until DBP 90-95mmHg | DBP                                                                    | Maternal side effects<br>Antihypertensive medication requirement<br>Maternal heart rate                                                                                                                                                                                                                                                                                              |
| Vigil-De Gracia 2007 <sup>35</sup>               | RCT                        | Enrolled day 2-3 after birth<br>F/U not specified       | 82           | 29.9±5.9<br>31.3±5.5     | Tertiary referral hospital | Panama              | Hydralazine 5mg IV every 20 minutes until BP <160/110 or max 5 doses                                                          | Labetalol 20mg, then 40mg, then 80mg IV every 20 minutes until BP <160/110mmHg or max 5 doses (300mg)                             | SBP + DBP                                                              | Maternal mortality<br>Maternal morbidity (development of pre-eclampsia with severe features)<br>Maternal side effects<br>Antihypertensive medication requirement<br>Maternal heart rate                                                                                                                                                                                              |
| Hennessy 2007 <sup>23</sup>                      | RCT                        | F/U 3h                                                  | 37           | 21-43 (mean 33)          | Tertiary referral hospital | Australia           | Diazoxide 15mg IV every 3 minutes, maximum dose 300mg                                                                         | Hydralazine 5mg IV every 20 minutes, maximum 15mg                                                                                 | SBP + DBP                                                              | SBP (10mmHg above target after 1 hour)<br>DBP (10mmHg above target after 1 hour)<br>Maternal side effects (including hypotension)<br>Time taken to administer drug                                                                                                                                                                                                                   |
| <b>Beta blockers</b>                             |                            |                                                         |              |                          |                            |                     |                                                                                                                               |                                                                                                                                   |                                                                        |                                                                                                                                                                                                                                                                                                                                                                                      |
| Fidler 1982 <sup>42</sup>                        | RCT                        | Enrolled 4 days after birth<br>F/U 9 days               | 80           | 29.7±1.0<br>27.8±0.9     | Tertiary referral hospital | UK                  | Timolol 5mg PO TDS for 9 days                                                                                                 | Methyldopa 250mg PO TDS for 9 days                                                                                                | DBP                                                                    | SBP<br>DBP (time to achieve control, proportion achieving control)<br>Maternal side effects                                                                                                                                                                                                                                                                                          |
| Garden 1982 <sup>24</sup>                        | RCT                        | Enrolled immediately after birth<br>F/U 45-64h          | 6            | 25-44<br>20-28           | Tertiary referral hospital | South Africa        | Labetalol 200mg/200ml 5% dextrose, 20mg/h IV infusion, doubled every 30 minutes until DBP <100mmHg or maximum dose 160mg/h    | Dihydralazine 100mg/200ml 5% dextrose, 10mg/h IV infusion, doubled every 30 minutes until DBP <100mmHg or maximum dose 80mg/h     | DBP                                                                    | Maternal side effects                                                                                                                                                                                                                                                                                                                                                                |
| Mabie 1987 <sup>22</sup>                         | RCT                        | Enrolled 1-96 hours after birth<br>F/U 3h               | 41           | 23.7±6.9<br>22.9±7.0     | Tertiary referral hospital | USA                 | Labetalol 20mg IV every 10 minutes then escalating until DBP <100mmHg or maximum cumulative dose reached (300mg)              | Hydralazine 5mg IV every 10 minutes until DBP <100mmHg                                                                            | MAP                                                                    | MAP (time to maximal decrease)<br>DBP (achieving target <100mmHg)<br>Maternal side effects<br>Antihypertensive medication requirement<br>Maternal heart rate                                                                                                                                                                                                                         |

\* n = postnatal population (antenatal excluded)

† If given separately, intervention group followed by control group

‡ Non-English language manuscript

| Study ID                               | Methods                    |                                                                            | Participants |                          |                            |                          | Intervention                                                                    |                                                                | Outcomes                            |                                                                                                                                                                                                                                                 |
|----------------------------------------|----------------------------|----------------------------------------------------------------------------|--------------|--------------------------|----------------------------|--------------------------|---------------------------------------------------------------------------------|----------------------------------------------------------------|-------------------------------------|-------------------------------------------------------------------------------------------------------------------------------------------------------------------------------------------------------------------------------------------------|
|                                        | Study design               | Duration                                                                   | n*           | Age (yr) <sup>†</sup>    | Setting                    | Country                  | Intervention                                                                    | Control(s)                                                     | Primary                             | Secondary                                                                                                                                                                                                                                       |
| Shumard 2016 <sup>41</sup>             | Retrospective cohort study | F/U not specified (but >24h)                                               | 128          | Not specified            | Not specified              | USA                      | Labetalol PO (variable dose and frequency)                                      | Nifedipine PO (variable dose and frequency)                    | Length of hospital stay after birth | SBP<br>DBP<br>Antihypertensive medication requirement                                                                                                                                                                                           |
| Sharma 2017 <sup>27, 28</sup>          | RCT                        | 4-6 weeks (BP outcomes)<br>6 months (duration antihypertensive medication) | 50           | 34.0±7.4<br>33.3±6.4     | Tertiary referral hospital | USA                      | Labetalol 200mg PO BD                                                           | Nifedipine XL 30mg PO OD                                       | SBP + DBP                           | Maternal side-effects<br>Length of hospital stay after birth<br>Antihypertensive medication requirement                                                                                                                                         |
| <b>Thiazides</b>                       |                            |                                                                            |              |                          |                            |                          |                                                                                 |                                                                |                                     |                                                                                                                                                                                                                                                 |
| Gaisin 2013 <sup>25</sup>              | RCT                        | 6 months                                                                   | 30           | 23-29                    | Not specified (hospital)   | Russia                   | Indapamide 1.5mg PO OD, duration unclear                                        | Adjusted dose methyldopa                                       | SBP + DBP                           | Safety data<br>Laboratory values (lipid and glucose metabolism)<br>Adherence to treatment<br>Weight reduction<br>Decrease in albuminuria<br>Decrease in LV mass index<br>Endothelial function<br>Milk production                                |
| Gaisin 2014 <sup>37</sup>              | RCT                        | 1 year                                                                     | 30           | 24-28                    | Not specified (hospital)   | Russia                   | Indapamide 1.5mg PO OD with ursodeoxycholic acid 250mg PO TDS, duration unclear | Adjusted dose methyldopa                                       | SBP + DBP                           | Maternal side effects<br>Laboratory values (atherogenic lipid profile, glucose metabolism, renal function)<br>Offspring adverse events<br>Weight reduction<br>Decrease in microalbuminuria<br>Decrease in LV mass index<br>Endothelial function |
| <b>Indole alkaloids</b>                |                            |                                                                            |              |                          |                            |                          |                                                                                 |                                                                |                                     |                                                                                                                                                                                                                                                 |
| Krebs A 1956 <sup>43, 44</sup>         | Retrospective cohort study | F/U not specified (but >24h)                                               | 140          | Not specified            | Not specified              | Switzerland <sup>†</sup> | Reserpine 0.25mg PO or IM TDS or QDS for 7 days                                 | Phenobarbital                                                  | SBP + DBP                           | SBP + DBP (non-responders)<br>Maternal side effects<br>Resolution of albuminuria<br>Resolution of oedema                                                                                                                                        |
| <b>Centrally-acting alpha-agonists</b> |                            |                                                                            |              |                          |                            |                          |                                                                                 |                                                                |                                     |                                                                                                                                                                                                                                                 |
| Noronha Neto 2016 <sup>29-31</sup>     | RCT                        | Enrolled immediately after birth<br>F/U 4 days                             | 90           | 28.9±6.7<br>28.8±6.7     | Tertiary referral hospital | Brazil                   | Clonidine 0.1mg PO repeated every 20 minutes to maximum 6 doses                 | Captopril 25mg PO repeated every 20 minutes to maximum 6 doses | SBP + DBP                           | SBP (% reduction)<br>SBP + DBP (daily mean)<br>Maternal side effects<br>Antihypertensive medication requirement                                                                                                                                 |
| <b>LOOP DIURETICS (4 studies)</b>      |                            |                                                                            |              |                          |                            |                          |                                                                                 |                                                                |                                     |                                                                                                                                                                                                                                                 |
| Matthews 1997 <sup>46</sup>            | RCT                        | Enrolled 12-24h after birth<br>F/U 6 weeks                                 | 19           | Not specified            | Tertiary referral hospital | UK                       | Furosemide 40mg PO OD for 7 days                                                | Placebo                                                        | MAP                                 | Length of hospital stay after birth<br>Antihypertensive medication requirement<br>Urine output<br>Laboratory values (hypokalemia)                                                                                                               |
| Ascarelli 2005 <sup>16</sup>           | RCT                        | Enrolled 2-24h after birth<br>F/U 6 weeks                                  | 264          | 22.8±6.1<br>22.9±6.0     | Tertiary referral hospital | USA                      | Furosemide 20mg PO OD + potassium 20mEq PO OD for 5 days                        | No intervention                                                | SBP                                 | Maternal morbidity (postnatal complication requiring intervention)<br>DBP<br>Length of hospital stay after birth<br>Antihypertensive medication requirement<br>Maternal weight<br>Maternal HR<br>Duration of magnesium sulphate                 |
| Amorim 2015 <sup>45</sup>              | RCT                        | Enrolled immediately after birth<br>F/U 5 days                             | 120          | Not specified            | Tertiary referral hospital | Brazil                   | Furosemide 40mg PO OD, duration not specified                                   | Placebo                                                        | SBP + DBP                           | MAP<br>SBP (daily episodes ≥180mmHg)<br>DBP (daily episodes ≥110mmHg)<br>Length of hospital stay after birth<br>Antihypertensive medication requirement<br>Urine output<br>Maternal heart rate                                                  |
| Veena 2017 <sup>19</sup>               | RCT                        | Enrolled <24h after birth<br>F/U until hospital discharge                  | 100          | 24.34±4.31<br>24.02±4.27 | Tertiary referral hospital | India                    | Furosemide 20mg PO OD + nifedipine 10mg PO TDS for 3 days                       | Nifedipine 10mg PO TDS for 3 days                              | SBP + DBP                           | MAP<br>Maternal morbidity (postnatal complication requiring intervention)<br>Length of hospital stay after birth<br>Antihypertensive medication requirement<br>Urine output                                                                     |
| <b>OTHER DRUGS (7 studies)</b>         |                            |                                                                            |              |                          |                            |                          |                                                                                 |                                                                |                                     |                                                                                                                                                                                                                                                 |
| <b>Selective 5-HT antagonists</b>      |                            |                                                                            |              |                          |                            |                          |                                                                                 |                                                                |                                     |                                                                                                                                                                                                                                                 |
| Weiner 1982 <sup>48</sup>              | RCT (crossover)            | F/U not specified                                                          | 5            | Not specified            | Tertiary referral          | USA                      | R41468 IV (dose not specified) bolus then infusion for 90 minutes               | Placebo                                                        | MAP                                 | MAP (rate at which hypertension returned post infusion)<br>Urine output (infusion related diuresis)                                                                                                                                             |



| Study ID                             | Methods                    |                                                                    | Participants |                                  |                            | Intervention         |                                                                                                                                                              | Outcomes                                  |                                               |                                                                                                                                                                                                                                                                                                                                                                                                                        |
|--------------------------------------|----------------------------|--------------------------------------------------------------------|--------------|----------------------------------|----------------------------|----------------------|--------------------------------------------------------------------------------------------------------------------------------------------------------------|-------------------------------------------|-----------------------------------------------|------------------------------------------------------------------------------------------------------------------------------------------------------------------------------------------------------------------------------------------------------------------------------------------------------------------------------------------------------------------------------------------------------------------------|
|                                      | Study design               | Duration                                                           | n*           | Age (yr) <sup>†</sup>            | Setting                    | Country              | Intervention                                                                                                                                                 | Control(s)                                | Primary                                       | Secondary                                                                                                                                                                                                                                                                                                                                                                                                              |
| Weiner 1984 <sup>49</sup>            | RCT (crossover)            | Enrolled immediately after birth<br>F/U 3.5h                       | 20           | 28±6.4                           | Tertiary referral          | USA                  | Ketanserin 10mg IV bolus then 4mg/hr IV infusion. Repeat bolus after 5 minutes if no response.                                                               | Placebo                                   | SBP + DBP                                     | Maternal side effects<br>DBP (achieving target <95mmHg)<br>MAP<br>Antihypertensive medication requirement<br>Response rate                                                                                                                                                                                                                                                                                             |
| Montenegro 1985 <sup>50</sup>        | RCT (crossover)            | Enrolled immediately after birth<br>F/U not specified              | 30           | 21.5 (13-31)                     | Tertiary referral hospital | USA                  | Ketanserin 10mg IV bolus, repeated if no response. If no response to second bolus IV infusion 4mg/hr (increments of 2mg/hr every 10 minutes to max 12mg/hr). | Placebo                                   | MAP                                           | Maternal side effects                                                                                                                                                                                                                                                                                                                                                                                                  |
| <b>Alternative therapies</b>         |                            |                                                                    |              |                                  |                            |                      |                                                                                                                                                              |                                           |                                               |                                                                                                                                                                                                                                                                                                                                                                                                                        |
| Hladunewich 2006 <sup>51</sup>       | RCT                        | Enrolled immediately after birth<br>F/U 10 days                    | 45           | 29±6<br>28±7                     | Tertiary referral hospital | USA                  | L-arginine 3.5g PO QDS or 10g IV TDS for 3-9 days                                                                                                            | Placebo                                   | MAP                                           | Maternal side effects<br>SBP<br>DBP<br>Antihypertensive medication requirement<br>Laboratory values (glomerular filtration rate (GFR) (inulin clearance), Albumin/creatinine (A/C) ratio, vasoactive hormones (NO and cGMP), liver function tests (LFTs), plt)<br>Renal plasma flow (para-amino hippurate clearance), renal blood flow = renal plasma flow / (1-HCT), renovascular resistance = MAP / renal blood flow |
| Liu 2009 <sup>52</sup>               | Quasi-randomised trial     | Enrolled day 2 after birth<br>F/U 3 weeks                          | 72           | 26.6±3.7<br>25.7±3.9             | District general hospital  | China <sup>†</sup>   | Shengkangbao 10g PO or IV BD for 3 weeks                                                                                                                     | No intervention                           | Percentage of cases with positive albuminuria | SBP<br>DBP<br>Laboratory values (24h urinary albumin, plasma total protein, plasma albumin, urinary albumin negative inversion rate, renal function)                                                                                                                                                                                                                                                                   |
| <b>Steroids</b>                      |                            |                                                                    |              |                                  |                            |                      |                                                                                                                                                              |                                           |                                               |                                                                                                                                                                                                                                                                                                                                                                                                                        |
| Barrilleaux 2005 <sup>53 54</sup>    | RCT                        | Enrolled immediately after birth<br>F/U 4.5 days                   | 157 (175)    | 24.5±6.8<br>23.9±6.4             | Tertiary referral hospital | USA                  | Dexamethasone 10mg x 2, then 5mg x 2 IV BD for 48 hours                                                                                                      | Placebo                                   | Antihypertensive medication requirement       | MAP<br>Critical care admission<br>Length of hospital stay after birth<br>Urine output<br>Laboratory values (plt, lactate dehydrogenase (LDH), aspartate aminotransferase (AST))<br>Stay in recovery >24h                                                                                                                                                                                                               |
| <b>Atrial natriuretic peptide</b>    |                            |                                                                    |              |                                  |                            |                      |                                                                                                                                                              |                                           |                                               |                                                                                                                                                                                                                                                                                                                                                                                                                        |
| Shigemitsu 2015 <sup>47</sup>        | Retrospective cohort study | F/U not specified                                                  | 16           | Not specified                    | Tertiary referral hospital | Japan                | Carperitide (no further details)                                                                                                                             | Standard care                             | MAP                                           | Maternal mortality<br>Maternal side effects<br>Need for dialysis<br>Time to diuresis                                                                                                                                                                                                                                                                                                                                   |
| <b>UTERINE CURETTAGE (8 studies)</b> |                            |                                                                    |              |                                  |                            |                      |                                                                                                                                                              |                                           |                                               |                                                                                                                                                                                                                                                                                                                                                                                                                        |
| Salvatore 1967 <sup>58</sup>         | Prospective cohort study   | Enrolled immediately after birth<br>F/U 10 days                    | 48           | 16-45                            | Tertiary referral hospital | Brazil <sup>††</sup> | Uterine curettage                                                                                                                                            | No intervention                           | SBP + DBP                                     | Maternal morbidity (development of pre-eclampsia with severe features – seizures)                                                                                                                                                                                                                                                                                                                                      |
| Magann 1993 <sup>59</sup>            | RCT                        | Enrolled immediately after birth<br>F/U 24h (telephone at 7 weeks) | 32           | 22.9±5.6<br>23.4±6.6             | Tertiary referral hospital | USA                  | Uterine curettage                                                                                                                                            | No intervention                           | MAP                                           | Maternal side effects<br>Length of hospital stay after birth<br>Antihypertensive medication requirement<br>Urine output<br>Laboratory values (HCT, plt, AST, LDH)                                                                                                                                                                                                                                                      |
| Magann 1994 <sup>60</sup>            | RCT                        | Enrolled immediately after birth<br>F/U 48h (telephone at 7 weeks) | 45           | 22.3±6.4<br>22.8±6.6<br>22.8±6.1 | Tertiary referral hospital | USA                  | Uterine curettage                                                                                                                                            | (1) Nifedipine PO<br>OR<br>(2) Usual care | MAP                                           | Maternal side effects<br>Urine output<br>Laboratory values (HCT, plt, AST, LDH)                                                                                                                                                                                                                                                                                                                                        |
| Gocmen 1996 <sup>57</sup>            | Prospective cohort study   | Enrolled immediately after birth<br>F/U 24h                        | 50           | Not specified                    | Tertiary referral hospital | Turkey <sup>†</sup>  | Uterine curettage                                                                                                                                            | No intervention                           | MAP                                           | Urine output<br>Laboratory values (plt)                                                                                                                                                                                                                                                                                                                                                                                |
| Gomez 2005 <sup>61</sup>             | RCT                        | Enrolled immediately after birth<br>F/U not specified              | 86           | Not specified                    | Tertiary referral hospital | Peru                 | Uterine curettage                                                                                                                                            | No intervention                           | MAP                                           | Maternal side effects<br>Length of hospital stay after birth<br>Antihypertensive medication requirement<br>Urine output                                                                                                                                                                                                                                                                                                |

| Study ID                                | Methods                    |                                                 | Participants    |                       |                            | Intervention |                                                                                                                                                                                      | Outcomes        |                                                           |                                                                                                                                                                                       |
|-----------------------------------------|----------------------------|-------------------------------------------------|-----------------|-----------------------|----------------------------|--------------|--------------------------------------------------------------------------------------------------------------------------------------------------------------------------------------|-----------------|-----------------------------------------------------------|---------------------------------------------------------------------------------------------------------------------------------------------------------------------------------------|
|                                         | Study design               | Duration                                        | n*              | Age (yr) <sup>†</sup> | Setting                    | Country      | Intervention                                                                                                                                                                         | Control(s)      | Primary                                                   | Secondary                                                                                                                                                                             |
| Alkan 2006 <sup>62</sup>                | RCT                        | Enrolled immediately after birth<br>F/U 24h     | 56              | 22.8±3.4<br>24.6±7.5  | Tertiary referral hospital | Turkey       | Uterine curettage                                                                                                                                                                    | No intervention | MAP                                                       | Maternal side effects<br>Urine output<br>Laboratory values (plt, LDH, AST, ALT)                                                                                                       |
| Ragab 2013 <sup>15</sup>                | RCT                        | Enrolled immediately after birth<br>F/U 96h     | 420             | Not specified         | Tertiary referral hospital | Egypt        | Uterine curettage                                                                                                                                                                    | No intervention | MAP                                                       | Maternal mortality<br>Maternal morbidity (development of pre-eclampsia with severe features)<br>MAP (time to MAP ≤105mmHg)<br>Urine output<br>Laboratory values (creatinine, plt, UA) |
| Mallapur 2015 <sup>18</sup>             | RCT                        | Enrolled immediately after birth<br>F/U 7 days  | 100             | Not specified         | Tertiary referral hospital | India        | Uterine curettage                                                                                                                                                                    | No intervention | MAP                                                       | Length of hospital stay after birth<br>Urine output<br>Laboratory values (plt, renal and liver function)                                                                              |
| <b>ORGANISATION OF CARE (2 studies)</b> |                            |                                                 |                 |                       |                            |              |                                                                                                                                                                                      |                 |                                                           |                                                                                                                                                                                       |
| York 1997 <sup>26</sup>                 | RCT                        | Enrolled immediately after birth<br>F/U 8 weeks | 96 <sup>§</sup> | 28±7<br>27±7          | Tertiary referral          | USA          | Contact with nurse specialist; early discharge if criteria met; 2 scheduled home visits and 10 telephone calls (twice weekly for 2 weeks, then weekly for 6 weeks) during 8-week F/U | Standard care   | Postnatal readmission to secondary care                   | Functional status<br>Patient satisfaction with care<br>Neonatal rehospitalisation / acute neonatal care<br>Cost                                                                       |
| Bibbo 2014 <sup>33</sup>                | Retrospective cohort study | F/U not specified (but >7 days)                 | 138             | Not specified         | Tertiary referral hospital | USA          | Specialised postpartum clinic                                                                                                                                                        | Usual care      | Postnatal readmission to secondary care and triage visits | Primary care provider F/U                                                                                                                                                             |

<sup>§</sup> Mixture of hypertension and diabetes – unable to separate

**APPENDIX S5: Summary of main results for included studies (n=39)****ANTIHYPERTENSIVE MEDICATIONS (18 studies)****Calcium channel blockers**Study ID: Barton 1990<sup>32</sup>**Population:** Postnatal women with severe pre-eclampsia**Setting:** Tertiary referral centres, USA**Intervention:** Nifedipine 10mg PO 4-hourly for 48 hours**Comparison:** Placebo

| Primary outcome               | Treatment effect                                                                           | Number of participants                                                        | Quality of the evidence                        | Comments |
|-------------------------------|--------------------------------------------------------------------------------------------|-------------------------------------------------------------------------------|------------------------------------------------|----------|
| MAP (18-24 hours after birth) | Intervention group 93.9±1.6mmHg, control group 100.2±2.6mmHg. Difference 6.3mmHg (p<0.05). | 31 (16 intervention, 15 control).<br>Follow-up complete for all participants. | Double-blind RCT.<br>Overall low risk of bias. |          |

Study ID: Vermillion 1999<sup>21</sup>**Population:** Antenatal and postnatal women with severe pre-eclampsia or super-imposed pre-eclampsia**Setting:** Tertiary referral centres (USA)**Intervention:** Nifedipine 10mg stat PO then 20mg every 20 minutes until BP <160/110mmHg or max 5 doses (90mg) + IV placebo**Comparison:** Labetalol 20mg, then 40mg, then 80mg IV every 20 minutes until BP <160/110mmHg or max 5 doses (300mg) + PO placebo

| Primary outcome                         | Treatment effect                                                                                          | Number of participants                                                                       | Quality of the evidence                                      | Comments                                                                                       |
|-----------------------------------------|-----------------------------------------------------------------------------------------------------------|----------------------------------------------------------------------------------------------|--------------------------------------------------------------|------------------------------------------------------------------------------------------------|
| SBP + DBP (time to target <160/100mmHg) | Intervention group 25.1±13.6 minutes, control group 43.6±25.4 minutes. Difference 18.5 minutes (p=0.002). | 50 (21 postnatal – 10 intervention, 11 control).<br>Follow-up complete for all participants. | Double-blind RCT.<br>Overall high risk of bias (other bias). | Small number of postnatal women (42%) (n<30).<br>Unable to obtain data for postnatal subgroup. |

Study ID: Sayin 2005<sup>34</sup>**Population:** Postnatal women with pre-eclampsia, severe pre-eclampsia, superimposed pre-eclampsia or eclampsia**Setting:** Tertiary referral centres (Turkey)**Intervention:** Nifedipine 10mg PO 6-hourly until BP <150/100mmHg for 48 hours**Comparison:** Methyldopa 250mg PO 8-hourly

| Primary outcome                         | Treatment effect                                                                       | Number of participants                                                        | Quality of the evidence                                          | Comments |
|-----------------------------------------|----------------------------------------------------------------------------------------|-------------------------------------------------------------------------------|------------------------------------------------------------------|----------|
| SBP + DBP (time to target <150/100mmHg) | Intervention group 6.7±2.5 days; control group 8.6±5.5 days. Difference 1.9 days (NS). | 83 (42 intervention, 41 control).<br>Follow-up complete for all participants. | Open-label RCT.<br>Overall high risk of bias (multiple domains). |          |

**Vasodilators**Study ID: Palot 1979<sup>36</sup>**Population:** Postnatal women with 'arterial hypertensions of labour and the postpartum period'**Setting:** Not specified (France)**Intervention:** Hydralazine 5mg IV stat then 1% IV infusion, furosemide 20mg IV stat and 30% hypertonic glucose**Comparison:** Clonidine IV and furosemide 20mg IV stat

| Primary outcome                                                        | Treatment effect                                                                                                       | Number of participants                                                                                     | Quality of the evidence                                                   | Comments                 |
|------------------------------------------------------------------------|------------------------------------------------------------------------------------------------------------------------|------------------------------------------------------------------------------------------------------------|---------------------------------------------------------------------------|--------------------------|
| Maternal morbidity (development of pre-eclampsia with severe features) | Intervention group: no women developed eclampsia. Control group: 2 women developed eclampsia. No statistical analysis. | 54 (11 intervention, 24 control, 19 non-systematic treatment).<br>Completeness of follow-up not specified. | Retrospective cohort study.<br>Overall high risk of bias (comparability). | No statistical analysis. |

Study ID: Griffis 1989<sup>38 39</sup>**Population:** Postnatal women with pre-eclampsia**Setting:** Tertiary referral centres (USA)**Intervention:** Hydralazine 20mg IM 6-hourly for 24h**Comparison:** Methyldopa 250mg IV 6-hourly for 24h

| Primary outcome              | Treatment effect                                                                                                                                                                    | Number of participants                                                        | Quality of the evidence                                          | Comments                  |
|------------------------------|-------------------------------------------------------------------------------------------------------------------------------------------------------------------------------------|-------------------------------------------------------------------------------|------------------------------------------------------------------|---------------------------|
| MAP (mean at 6 and 12 hours) | 6 hours: intervention group 104.5mmHg, control group 112mmHg. Difference 7.5mmHg (p=0.0057).<br>12 hours: intervention group 100mmHg, control group 108mmHg. Difference 8mmHg (NS). | 26 (12 intervention, 14 control).<br>Follow-up complete for all participants. | Open-label RCT.<br>Overall high risk of bias (multiple domains). | Small sample size (n<30). |

Study ID: Walss Rodriguez 1991<sup>40</sup>**Population:** Postnatal women with severe pre-eclampsia**Setting:** Not specified (Mexico)**Intervention:** Hydralazine 40mg PO 6-hourly, duration not specified + if DBP > 110mmHg PRN nifedipine 10mg sublingual every 30 minutes, to maximum of 3 doses (30mg)**Comparison:** Nifedipine 10mg sublingual every 30 minutes if DBP ≥ 110mmHg

| Primary outcome | Treatment effect                                                                | Number of participants                                                        | Quality of the evidence                                          | Comments |
|-----------------|---------------------------------------------------------------------------------|-------------------------------------------------------------------------------|------------------------------------------------------------------|----------|
| SBP (mean)      | Intervention group 143.6mmHg, control group 138.0mmHg. Difference 5.6mmHg (NS). | 38 (18 intervention, 20 control).<br>Completeness of follow-up not specified. | Open-label RCT.<br>Overall high risk of bias (multiple domains). |          |

Study ID: Begum 2002<sup>17</sup>**Population:** Antenatal and postnatal women with eclampsia**Setting:** Tertiary referral centres (Bangladesh)**Intervention:** Hydralazine 5mg then 2mg IV bolus every 15 minutes until DBP 90-95mmHg**Comparison:** Hydralazine 20mg /200ml normal saline IV infusion; 10 drops per min, increased by 5 drops at 15 min intervals; until DBP 90-95mmHg

| Primary outcome                                                                                                                                     | Treatment effect                                                                                                               | Number of participants                                                                           | Quality of the evidence                                                          | Comments                                                                                    |
|-----------------------------------------------------------------------------------------------------------------------------------------------------|--------------------------------------------------------------------------------------------------------------------------------|--------------------------------------------------------------------------------------------------|----------------------------------------------------------------------------------|---------------------------------------------------------------------------------------------|
| DBP (time to target 90-95mmHg)                                                                                                                      | Intervention group 65.23±23.38 minutes, control group 186.36±79.77 minutes. Difference 121.13 minutes (p<0.001).               | 77 (15 postnatal – 9 intervention, 6 control). Completeness of follow-up not specified.          | Open-label quasi-randomised trial. Overall high risk of bias (multiple domains). | Small number of postnatal women (19%) (n<30). Unable to obtain data for postnatal subgroup. |
| Study ID: Vigil de Gracia 2007 <sup>35</sup>                                                                                                        |                                                                                                                                |                                                                                                  |                                                                                  |                                                                                             |
| <b>Population:</b> Postnatal women with severe gestational hypertension, severe pre-eclampsia or super-imposed pre-eclampsia                        |                                                                                                                                |                                                                                                  |                                                                                  |                                                                                             |
| <b>Setting:</b> Tertiary referral centres (Panama)                                                                                                  |                                                                                                                                |                                                                                                  |                                                                                  |                                                                                             |
| <b>Intervention:</b> Hydralazine 5mg IV every 20 minutes until BP <160/110mmHg or maximum 5 doses                                                   |                                                                                                                                |                                                                                                  |                                                                                  |                                                                                             |
| <b>Comparison:</b> Labetalol 20mg, then 40mg, then 80mg IV every 20 minutes until BP <160/110mmHg or maximum 5 doses (300mg)                        |                                                                                                                                |                                                                                                  |                                                                                  |                                                                                             |
| Primary outcome                                                                                                                                     | Treatment effect                                                                                                               | Number of participants                                                                           | Quality of the evidence                                                          | Comments                                                                                    |
| SBP + DBP (persistent hypertension >=160/110mmHg after 5 doses of medication)                                                                       | Intervention group 0/42, control group 1/40 (NS).                                                                              | 82 (42 intervention, 40 control). Follow-up complete for all participants.                       | Open-label RCT. Overall high risk of bias (multiple domains).                    |                                                                                             |
| Study ID: Hennessy 2007 <sup>23</sup>                                                                                                               |                                                                                                                                |                                                                                                  |                                                                                  |                                                                                             |
| <b>Population:</b> Antenatal and postnatal women with pre-eclampsia, superimposed pre-eclampsia or essential hypertension                           |                                                                                                                                |                                                                                                  |                                                                                  |                                                                                             |
| <b>Setting:</b> Tertiary referral (Australia)                                                                                                       |                                                                                                                                |                                                                                                  |                                                                                  |                                                                                             |
| <b>Intervention:</b> Diazoxide 15mg IV every 3 minutes, until target BP (140/90mmHg) reached or maximum cumulative dose 300mg                       |                                                                                                                                |                                                                                                  |                                                                                  |                                                                                             |
| <b>Comparison:</b> Hydralazine 5mg IV every 20 minutes, until target BP (140/90mmHg) reached or maximum cumulative dose 15mg                        |                                                                                                                                |                                                                                                  |                                                                                  |                                                                                             |
| Primary outcome                                                                                                                                     | Treatment effect                                                                                                               | Number of participants                                                                           | Quality of the evidence                                                          | Comments                                                                                    |
| SBP + DBP (proportion achieving target BP <=140/90mmHg)                                                                                             | Intervention group 67%, control group 43% (p<0.01). RR 0.637 (95% CI 0.456-0.89) for not reaching target BP with intervention. | 124 total (37 postnatal – 11 intervention, 16 control). Follow-up complete for all participants. | Open-label RCT. Overall high risk of bias (multiple domains).                    | Small proportion of postnatal women (30%). Unable to obtain data for postnatal subgroup.    |
| <b>Beta-blockers</b>                                                                                                                                |                                                                                                                                |                                                                                                  |                                                                                  |                                                                                             |
| Study ID: Garden 1982 <sup>24</sup>                                                                                                                 |                                                                                                                                |                                                                                                  |                                                                                  |                                                                                             |
| <b>Population:</b> Antenatal and postnatal women with severe pre-eclampsia or eclampsia                                                             |                                                                                                                                |                                                                                                  |                                                                                  |                                                                                             |
| <b>Setting:</b> Tertiary referral (South Africa)                                                                                                    |                                                                                                                                |                                                                                                  |                                                                                  |                                                                                             |
| <b>Intervention:</b> Labetalol 200mg/200ml 5% dextrose, 20mg/h IV infusion, doubled every 30 minutes until DBP <100mmHg or maximum dose 160mg/hour  |                                                                                                                                |                                                                                                  |                                                                                  |                                                                                             |
| <b>Comparison:</b> Dihydralazine 100mg/200ml 5% dextrose, 10mg/h IV infusion, doubled every 30 minutes until DBP <100mmHg or maximum dose 80mg/hour |                                                                                                                                |                                                                                                  |                                                                                  |                                                                                             |
| Primary outcome                                                                                                                                     | Treatment effect                                                                                                               | Number of participants                                                                           | Quality of the evidence                                                          | Comments                                                                                    |
| DBP (proportion achieving target DBP 90-100mHg within 2 hours)                                                                                      | Intervention group 5/6, control group 2/6. No statistical analysis.                                                            | 12 total (6 postnatal – 3 intervention, 3 control). Follow-up complete for all participants.     | RCT (blinding not specified). Overall high risk of bias (other bias).            | Very small sample size (n<15). Unable to obtain data for postnatal subgroup.                |
| Study ID: Fidler 1982 <sup>42</sup>                                                                                                                 |                                                                                                                                |                                                                                                  |                                                                                  |                                                                                             |
| <b>Population:</b> Postnatal women with gestational hypertension                                                                                    |                                                                                                                                |                                                                                                  |                                                                                  |                                                                                             |
| <b>Setting:</b> Tertiary referral (UK)                                                                                                              |                                                                                                                                |                                                                                                  |                                                                                  |                                                                                             |
| <b>Intervention:</b> Timolol 5mg PO 8-hourly for 9 days                                                                                             |                                                                                                                                |                                                                                                  |                                                                                  |                                                                                             |
| <b>Comparison:</b> Methyldopa 250mg PO 8-hourly for 9 days                                                                                          |                                                                                                                                |                                                                                                  |                                                                                  |                                                                                             |
| Primary outcome                                                                                                                                     | Treatment effect                                                                                                               | Number of participants                                                                           | Quality of the evidence                                                          | Comments                                                                                    |
| DBP (day 1)                                                                                                                                         | Intervention group 88.7mmHg, control group 93.8mmHg. Difference 5.1mmHg (p<0.05).                                              | 80 (40 intervention, 40 control). Follow-up complete in 79/80                                    | RCT (blinding not specified). Overall high risk of bias (multiple domains).      |                                                                                             |
| Study ID: Mabie 1987 <sup>22</sup>                                                                                                                  |                                                                                                                                |                                                                                                  |                                                                                  |                                                                                             |
| <b>Population:</b> Antenatal and postnatal women with pre-eclampsia, superimposed pre-eclampsia, eclampsia or essential hypertension                |                                                                                                                                |                                                                                                  |                                                                                  |                                                                                             |
| <b>Setting:</b> Tertiary referral (USA)                                                                                                             |                                                                                                                                |                                                                                                  |                                                                                  |                                                                                             |
| <b>Intervention:</b> Labetalol 20mg IV every 10 minutes then escalating until DBP < 100mmHg or maximum cumulative dose reached (300mg)              |                                                                                                                                |                                                                                                  |                                                                                  |                                                                                             |
| <b>Comparison:</b> Hydralazine 5mg IV every 10 minutes until DBP < 100mmHg                                                                          |                                                                                                                                |                                                                                                  |                                                                                  |                                                                                             |
| Primary outcome                                                                                                                                     | Treatment effect                                                                                                               | Number of participants                                                                           | Quality of the evidence                                                          | Comments                                                                                    |
| MAP (mean maximal decrease)                                                                                                                         | Intervention group 25.5±11.2mmHg, 33.3±13.2mmHg control group. Difference 7.8mmHg (p=0.02).                                    | 60 (41 postnatal – 27 intervention, 14 control). Follow-up complete for all participants.        | Open-label RCT. Overall high risk of bias (multiple domains).                    |                                                                                             |
| Study ID: Shumard 2016 <sup>41</sup>                                                                                                                |                                                                                                                                |                                                                                                  |                                                                                  |                                                                                             |
| <b>Population:</b> Postnatal women with gestational hypertension or pre-eclampsia                                                                   |                                                                                                                                |                                                                                                  |                                                                                  |                                                                                             |
| <b>Setting:</b> Not specified (USA)                                                                                                                 |                                                                                                                                |                                                                                                  |                                                                                  |                                                                                             |
| <b>Intervention:</b> Labetalol PO (variable dose and frequency)                                                                                     |                                                                                                                                |                                                                                                  |                                                                                  |                                                                                             |
| <b>Comparison:</b> Nifedipine PO (variable dose and frequency)                                                                                      |                                                                                                                                |                                                                                                  |                                                                                  |                                                                                             |
| Primary outcome                                                                                                                                     | Treatment effect                                                                                                               | Number of participants                                                                           | Quality of the evidence                                                          | Comments                                                                                    |
| Length of hospital stay after delivery                                                                                                              | Intervention group 3.5 days, control group 3.6 days. Difference 0.1 days (NS).                                                 | 128 (42 intervention, 86 control). Follow-up complete for all participants.                      | Retrospective cohort study. Overall high risk of bias (comparability).           | Conference abstract only. Authors did not provide further data.                             |
| Study ID: Sharma 2017 <sup>27 28</sup>                                                                                                              |                                                                                                                                |                                                                                                  |                                                                                  |                                                                                             |
| <b>Population:</b> Postnatal women with gestational hypertension or pre-eclampsia                                                                   |                                                                                                                                |                                                                                                  |                                                                                  |                                                                                             |
| <b>Setting:</b> Tertiary referral (USA)                                                                                                             |                                                                                                                                |                                                                                                  |                                                                                  |                                                                                             |
| <b>Intervention:</b> Labetalol 200mg PO 12-hourly, increased to 800mg PO 12-hourly as needed                                                        |                                                                                                                                |                                                                                                  |                                                                                  |                                                                                             |
| <b>Comparison:</b> Nifedipine XL 30mg PO once daily, increased to 90mg PO once daily as needed                                                      |                                                                                                                                |                                                                                                  |                                                                                  |                                                                                             |
| Primary outcome                                                                                                                                     | Treatment effect                                                                                                               | Number of participants                                                                           | Quality of the evidence                                                          | Comments                                                                                    |

|    |                                                                                                                         |                                                                                                                                                                                                             |                                                                                  |                                                                                              |                                                                                                                  |
|----|-------------------------------------------------------------------------------------------------------------------------|-------------------------------------------------------------------------------------------------------------------------------------------------------------------------------------------------------------|----------------------------------------------------------------------------------|----------------------------------------------------------------------------------------------|------------------------------------------------------------------------------------------------------------------|
| 1  | SBP + DBP (time to sustained BP control: absence of severe hypertension for $\geq 12$ hours)                            | Intervention group 37.6 hours, control group 38.2 hours. Difference 0.6 hours (NS).                                                                                                                         | 50 (25 intervention, 25 control).<br>Follow-up complete for all participants.    | Open-label RCT.<br>Overall high risk of bias (multiple domains).                             |                                                                                                                  |
| 2  | <b>Thiazides</b>                                                                                                        |                                                                                                                                                                                                             |                                                                                  |                                                                                              |                                                                                                                  |
| 3  | Study ID: Gaisin 2013 <sup>25</sup>                                                                                     |                                                                                                                                                                                                             |                                                                                  |                                                                                              |                                                                                                                  |
| 4  | <b>Population:</b> Postnatal women with pre-eclampsia, super-imposed pre-eclampsia or essential hypertension            |                                                                                                                                                                                                             |                                                                                  |                                                                                              |                                                                                                                  |
| 5  | <b>Setting:</b> Not specified (Russia)                                                                                  |                                                                                                                                                                                                             |                                                                                  |                                                                                              |                                                                                                                  |
| 6  | <b>Intervention:</b> Indapamide 1.5mg PO OD, duration unclear                                                           |                                                                                                                                                                                                             |                                                                                  |                                                                                              |                                                                                                                  |
| 7  | <b>Comparison:</b> Adjusted dose methyldopa                                                                             |                                                                                                                                                                                                             |                                                                                  |                                                                                              |                                                                                                                  |
| 8  | <b>Primary outcome</b>                                                                                                  | <b>Treatment effect</b>                                                                                                                                                                                     | <b>Number of participants</b>                                                    | <b>Quality of the evidence</b>                                                               | <b>Comments</b>                                                                                                  |
| 9  | Systolic and diastolic BP                                                                                               | Intervention group 113 $\pm$ 6/74 $\pm$ 4mmHg, control group 116 $\pm$ 5/75 $\pm$ 4mmHg (NS).                                                                                                               | 30 (15 intervention, 15 control).<br>Completeness of follow-up not specified.    | Open-label RCT.<br>Overall high risk of bias (multiple domains).                             | Conference abstract only. Authors did not provide further data.                                                  |
| 10 | Study ID: Gaisin 2014 <sup>37</sup>                                                                                     |                                                                                                                                                                                                             |                                                                                  |                                                                                              |                                                                                                                  |
| 11 | <b>Population:</b> Postnatal women with pre-eclampsia                                                                   |                                                                                                                                                                                                             |                                                                                  |                                                                                              |                                                                                                                  |
| 12 | <b>Setting:</b> Not specified (Russia)                                                                                  |                                                                                                                                                                                                             |                                                                                  |                                                                                              |                                                                                                                  |
| 13 | <b>Intervention:</b> Indapamide 1.5mg PO once daily + ursodeoxycholic acid 250mg PO three times daily, duration unclear |                                                                                                                                                                                                             |                                                                                  |                                                                                              |                                                                                                                  |
| 14 | <b>Comparison:</b> Adjusted dose methyldopa                                                                             |                                                                                                                                                                                                             |                                                                                  |                                                                                              |                                                                                                                  |
| 15 | <b>Primary outcome</b>                                                                                                  | <b>Treatment effect</b>                                                                                                                                                                                     | <b>Number of participants</b>                                                    | <b>Quality of the evidence</b>                                                               | <b>Comments</b>                                                                                                  |
| 16 | SBP + DBP                                                                                                               | Intervention group 122 $\pm$ 6/75 $\pm$ 4 mmHg, control group 126 $\pm$ 6/78 $\pm$ 5mmHg (NS).                                                                                                              | 30 (allocation not described).<br>Completeness of follow-up not specified.       | Open-label RCT.<br>Overall high risk of bias (multiple domains).                             | Conference abstract only. Authors did not provide further data. Number of participants in each group not stated. |
| 17 | <b>Indole alkaloids</b>                                                                                                 |                                                                                                                                                                                                             |                                                                                  |                                                                                              |                                                                                                                  |
| 18 | Study ID: Krebs 1956 <sup>43 44</sup>                                                                                   |                                                                                                                                                                                                             |                                                                                  |                                                                                              |                                                                                                                  |
| 19 | <b>Population:</b> Postnatal women with gestational hypertension, pre-eclampsia, severe pre-eclampsia or eclampsia      |                                                                                                                                                                                                             |                                                                                  |                                                                                              |                                                                                                                  |
| 20 | <b>Setting:</b> Not specified (Germany)                                                                                 |                                                                                                                                                                                                             |                                                                                  |                                                                                              |                                                                                                                  |
| 21 | <b>Intervention:</b> Reserpine 0.25mg PO or intramuscular 6-8 hourly for 7 days                                         |                                                                                                                                                                                                             |                                                                                  |                                                                                              |                                                                                                                  |
| 22 | <b>Comparison:</b> Phenobarbital                                                                                        |                                                                                                                                                                                                             |                                                                                  |                                                                                              |                                                                                                                  |
| 23 | <b>Primary outcome</b>                                                                                                  | <b>Treatment effect</b>                                                                                                                                                                                     | <b>Number of participants</b>                                                    | <b>Quality of the evidence</b>                                                               | <b>Comments</b>                                                                                                  |
| 24 | SBP + DBP (maximal reduction)                                                                                           | Intervention halved time to maximal BP reduction (no further details reported).<br>No statistical analysis.                                                                                                 | 140 (70 intervention, 70 control).<br>Completeness of follow-up not specified.   | Retrospective cohort study.<br>Overall high risk of bias (selection and outcome assessment). | No statistical analysis.                                                                                         |
| 25 | <b>Centrally-acting alpha agonists</b>                                                                                  |                                                                                                                                                                                                             |                                                                                  |                                                                                              |                                                                                                                  |
| 26 | Study ID: Noronha Neto 2016 <sup>29-31</sup>                                                                            |                                                                                                                                                                                                             |                                                                                  |                                                                                              |                                                                                                                  |
| 27 | <b>Population:</b> Postnatal women with severe hypertensive disorders of pregnancy                                      |                                                                                                                                                                                                             |                                                                                  |                                                                                              |                                                                                                                  |
| 28 | <b>Setting:</b> Tertiary referral (Brazil)                                                                              |                                                                                                                                                                                                             |                                                                                  |                                                                                              |                                                                                                                  |
| 29 | <b>Intervention:</b> Clonidine 0.1mg PO repeated every 20 minutes to max 6 doses                                        |                                                                                                                                                                                                             |                                                                                  |                                                                                              |                                                                                                                  |
| 30 | <b>Comparison:</b> Captopril 25mg PO repeated every 20 minutes to max 6 doses                                           |                                                                                                                                                                                                             |                                                                                  |                                                                                              |                                                                                                                  |
| 31 | <b>Primary outcome</b>                                                                                                  | <b>Treatment effect</b>                                                                                                                                                                                     | <b>Number of participants</b>                                                    | <b>Quality of the evidence</b>                                                               | <b>Comments</b>                                                                                                  |
| 32 | SBP + DBP (episodes $\geq 180$ mmHg and/or DBP $\geq 110$ mmHg)                                                         | Intervention group 2.1 $\pm$ 2.1 episodes, control group 3.5 $\pm$ 4.7 episodes (NS).                                                                                                                       | 90 (45 intervention, 45 control).<br>Follow-up complete in 88/90.                | Double-blind RCT.<br>Overall low risk of bias.                                               |                                                                                                                  |
| 33 | <b>DIURETICS (4 studies)</b>                                                                                            |                                                                                                                                                                                                             |                                                                                  |                                                                                              |                                                                                                                  |
| 34 | Study ID: Matthews 1997 <sup>46</sup>                                                                                   |                                                                                                                                                                                                             |                                                                                  |                                                                                              |                                                                                                                  |
| 35 | <b>Population:</b> Postnatal women with severe pre-eclampsia or eclampsia                                               |                                                                                                                                                                                                             |                                                                                  |                                                                                              |                                                                                                                  |
| 36 | <b>Setting:</b> Tertiary referral centres (UK)                                                                          |                                                                                                                                                                                                             |                                                                                  |                                                                                              |                                                                                                                  |
| 37 | <b>Intervention:</b> Furosemide 40mg PO once daily for 7 days                                                           |                                                                                                                                                                                                             |                                                                                  |                                                                                              |                                                                                                                  |
| 38 | <b>Comparison:</b> Placebo                                                                                              |                                                                                                                                                                                                             |                                                                                  |                                                                                              |                                                                                                                  |
| 39 | <b>Primary outcome</b>                                                                                                  | <b>Treatment effect</b>                                                                                                                                                                                     | <b>Number of participants</b>                                                    | <b>Quality of the evidence</b>                                                               | <b>Comments</b>                                                                                                  |
| 40 | MAP (decrease)                                                                                                          | Intervention group -10.6mmHg, control group -9.75mmHg (NS).                                                                                                                                                 | 19 (10 intervention, 9 control).<br>Follow-up complete in 18/19.                 | Double-blind RCT.<br>Overall high risk of bias (other bias).                                 | Small sample size (n<30).                                                                                        |
| 41 | Study ID: Ascarelli 2005 <sup>16</sup>                                                                                  |                                                                                                                                                                                                             |                                                                                  |                                                                                              |                                                                                                                  |
| 42 | <b>Population:</b> Postnatal women with pre-eclampsia, severe pre-eclampsia or superimposed pre-eclampsia               |                                                                                                                                                                                                             |                                                                                  |                                                                                              |                                                                                                                  |
| 43 | <b>Setting:</b> Tertiary referral centres (USA)                                                                         |                                                                                                                                                                                                             |                                                                                  |                                                                                              |                                                                                                                  |
| 44 | <b>Intervention:</b> Furosemide 20mg PO once daily + potassium 20mEq PO once daily for 5 days                           |                                                                                                                                                                                                             |                                                                                  |                                                                                              |                                                                                                                  |
| 45 | <b>Comparison:</b> No intervention                                                                                      |                                                                                                                                                                                                             |                                                                                  |                                                                                              |                                                                                                                  |
| 46 | <b>Primary outcome</b>                                                                                                  | <b>Treatment effect</b>                                                                                                                                                                                     | <b>Number of participants</b>                                                    | <b>Quality of the evidence</b>                                                               | <b>Comments</b>                                                                                                  |
| 47 | SBP                                                                                                                     | No significant difference between groups (details not reported).<br>Severe pre-eclampsia (n=70) day 2 SBP intervention group 142 $\pm$ 13mmHg, control group 153 $\pm$ 19mmHg. Difference 11mmHg (p<0.004). | 264 (132 intervention, 132 control).<br>Completeness of follow-up not specified. | Open-label RCT.<br>Overall high risk of bias (multiple domains).                             |                                                                                                                  |
| 48 | Study ID: Amorim 2015 <sup>45</sup>                                                                                     |                                                                                                                                                                                                             |                                                                                  |                                                                                              |                                                                                                                  |

1 **Population:** Postnatal women with severe pre-eclampsia  
 2 **Setting:** Tertiary referral (Brazil)  
 3 **Intervention:** Furosemide 40mg PO once daily for maximum 5 days  
 4 **Comparison:** Placebo

| Primary outcome | Treatment effect                                                                                         | Number of participants                                            | Quality of the evidence                                          | Comments                                                                                                         |
|-----------------|----------------------------------------------------------------------------------------------------------|-------------------------------------------------------------------|------------------------------------------------------------------|------------------------------------------------------------------------------------------------------------------|
| SBP + DBP       | Intervention group had significantly improved SBP + DBP. Magnitude of difference not reported (p<0.001). | 120 (allocation not described).<br>Follow-up complete in 118/120. | Double-blind RCT.<br>Overall high risk of bias (reporting bias). | Conference abstract only. Authors did not provide further data. Number of participants in each group not stated. |

8 Study ID: Veena 2017<sup>19</sup>

10 **Population:** Postnatal women with severe pre-eclampsia  
 11 **Setting:** Tertiary referral centre (India)  
 12 **Intervention:** Furosemide 10mg PO once daily plus nifedipine 10mg PO three times daily for 3 days  
 13 **Comparison:** Nifedipine 10mg PO three times daily for 3 days

| Primary outcome | Treatment effect                                                                                                              | Number of participants                                                                            | Quality of the evidence                                          | Comments |
|-----------------|-------------------------------------------------------------------------------------------------------------------------------|---------------------------------------------------------------------------------------------------|------------------------------------------------------------------|----------|
| SBP + DBP       | No significant difference between groups (absolute values and differences not reported, p=0.457 for SBP and p=0.642 for DBP). | 100 (50 intervention, 50 control).<br>Follow-up complete in 98/100 (49 intervention, 49 control). | Open-label RCT.<br>Overall high risk of bias (multiple domains). |          |

#### 18 OTHER DRUGS (7 studies)

##### 19 Selective 5-HT antagonists

21 Study ID: Weiner 1982<sup>48</sup>

22 **Population:** Postnatal women with severe pre-eclampsia  
 23 **Setting:** Tertiary referral (USA)  
 24 **Intervention:** R41468 IV (dose not specified) bolus then infusion for 90 minutes  
 25 **Comparison:** Placebo

| Primary outcome            | Treatment effect                                                                   | Number of participants                                    | Quality of the evidence                                                  | Comments                                                                                       |
|----------------------------|------------------------------------------------------------------------------------|-----------------------------------------------------------|--------------------------------------------------------------------------|------------------------------------------------------------------------------------------------|
| MAP (mean maximal decline) | Intervention group 31.6mmHg, control group 6.0mmHg. Difference 25.6mmHg (p<0.001). | 5 (crossover).<br>Follow-up complete in all participants. | Double blind RCT (crossover).<br>Overall high risk of bias (other bias). | Conference abstract only. Authors did not provide further data. Very small sample size (n<15). |

29 Study ID: Weiner 1984<sup>49</sup>

31 **Population:** Postnatal women with pre-eclampsia and super-imposed pre-eclampsia  
 32 **Setting:** Tertiary referral (USA)  
 33 **Intervention:** Ketanserin 10mg IV bolus then 4mg/hr IV infusion. Repeat bolus after 5 minutes if no response.  
 34 **Comparison:** Placebo

| Primary outcome                  | Treatment effect                                                                     | Number of participants                                     | Quality of the evidence                                                  | Comments                  |
|----------------------------------|--------------------------------------------------------------------------------------|------------------------------------------------------------|--------------------------------------------------------------------------|---------------------------|
| SBP + DBP (mean maximal decline) | Intervention group 41/34mmHg, control group 7/7mmHg. Difference 34/27mmHg (p<0.001). | 20 (crossover).<br>Follow-up complete in all participants. | Double blind RCT (crossover).<br>Overall high risk of bias (other bias). | Small sample size (n<30). |

38 Study ID: Montenegro 1985<sup>50</sup>

39 **Population:** Postnatal women with pre-eclampsia  
 40 **Setting:** Tertiary referral (USA)  
 41 **Intervention:** Ketanserin 10mg IV bolus, repeated if no response. If no response to second bolus IV infusion 4mg/hr (increments of 2mg/hr every 10 minutes to max 12mg/hr).  
 42 **Comparison:** Placebo

| Primary outcome | Treatment effect                                                                                               | Number of participants                          | Quality of the evidence                                                        | Comments |
|-----------------|----------------------------------------------------------------------------------------------------------------|-------------------------------------------------|--------------------------------------------------------------------------------|----------|
| MAP             | Intervention group had significantly improved MAP, over 30 minutes after drug administered. F = 9.66 (p <0.01) | 30 (crossover).<br>Follow-up complete in 23/30. | Double blind RCT (crossover).<br>Overall high risk of bias (multiple domains). |          |

#### 46 Alternative therapies

48 Study ID: Hladunewich 2006<sup>51</sup>

49 **Population:** Postnatal women with pre-eclampsia  
 50 **Setting:** Tertiary referral (USA)  
 51 **Intervention:** L-arginine 3.5g PO four times daily OR L-arginine 10g IV three times daily (if unable to take PO) for 3-9 days postpartum  
 52 **Comparison:** Placebo

| Primary outcome | Treatment effect                                                                                                                                             | Number of participants                                            | Quality of the evidence                                            | Comments |
|-----------------|--------------------------------------------------------------------------------------------------------------------------------------------------------------|-------------------------------------------------------------------|--------------------------------------------------------------------|----------|
| MAP             | Intervention group day 3 102±12 mmHg and day 10 98±14 mmHg; control group day 3 103±12mmHg and day 10 96±11 mmHg. Difference day 3 1mmHg, day 10 2mmHg (NS). | 45 (22 intervention, 23 control).<br>Follow-up complete in 39/45. | Double blind RCT.<br>Overall high risk of bias (multiple domains). |          |

57 Study ID: Liu 2009<sup>52</sup>

58 **Population:** Postnatal women with severe pre-eclampsia  
 59 **Setting:** District general (China)  
 60 **Intervention:** Shengkangbao 10g PO or IV twice daily for 3 weeks  
 60 **Comparison:** No intervention

| Primary outcome | Treatment effect | Number of participants | Quality of the evidence | Comments |
|-----------------|------------------|------------------------|-------------------------|----------|
|-----------------|------------------|------------------------|-------------------------|----------|

|    |                                                                                                     |                                                                                                                                                               |                                                                                          |                                                                                                |                                                                                                                           |
|----|-----------------------------------------------------------------------------------------------------|---------------------------------------------------------------------------------------------------------------------------------------------------------------|------------------------------------------------------------------------------------------|------------------------------------------------------------------------------------------------|---------------------------------------------------------------------------------------------------------------------------|
| 1  | Percentage of cases with positive albuminuria                                                       | At 3 weeks intervention group 0.7+/-0.8% positive albuminuria, control group 1.5+/-0.9%. Difference 0.8% (p<0.01).                                            | 77 (allocation not described).<br>Follow-up complete in 72 (38 intervention, 32 control) | Open-label quasi-randomised study.<br>Overall high risk of bias (multiple domains).            | Clinical significance of primary outcome unclear.                                                                         |
| 2  | <b>Steroids</b>                                                                                     |                                                                                                                                                               |                                                                                          |                                                                                                |                                                                                                                           |
| 3  | Study ID: Barrilleaux 2005 <sup>53,54</sup>                                                         |                                                                                                                                                               |                                                                                          |                                                                                                |                                                                                                                           |
| 4  | <b>Population:</b> Postnatal women with severe pre-eclampsia and eclampsia                          |                                                                                                                                                               |                                                                                          |                                                                                                |                                                                                                                           |
| 5  | <b>Setting:</b> Tertiary referral (USA)                                                             |                                                                                                                                                               |                                                                                          |                                                                                                |                                                                                                                           |
| 6  | <b>Intervention:</b> Dexamethasone 10mg x2, then 5mg x 2 IV 12-hourly for 48 hours                  |                                                                                                                                                               |                                                                                          |                                                                                                |                                                                                                                           |
| 7  | <b>Comparison:</b> Placebo (IV saline)                                                              |                                                                                                                                                               |                                                                                          |                                                                                                |                                                                                                                           |
| 8  | <b>Primary outcome</b>                                                                              | <b>Treatment effect</b>                                                                                                                                       | <b>Number of participants</b>                                                            | <b>Quality of the evidence</b>                                                                 | <b>Comments</b>                                                                                                           |
| 9  | Anti-hypertensive medication requirement                                                            | Intervention group 38/77, control group 31/80 required antihypertensive treatment in the first 48h PN (NS).                                                   | 157 (77 intervention, 80 control).<br>Follow-up complete in 155/157.                     | Double blind RCT.<br>Overall high risk of bias (reporting bias).                               |                                                                                                                           |
| 10 | <b>Atrial natriuretic peptide</b>                                                                   |                                                                                                                                                               |                                                                                          |                                                                                                |                                                                                                                           |
| 11 | Study ID: Shigemitsu 2015 <sup>47</sup>                                                             |                                                                                                                                                               |                                                                                          |                                                                                                |                                                                                                                           |
| 12 | <b>Population:</b> Postnatal women with severe pre-eclampsia, HELLP syndrome or placental abruption |                                                                                                                                                               |                                                                                          |                                                                                                |                                                                                                                           |
| 13 | <b>Setting:</b> Tertiary referral (Japan)                                                           |                                                                                                                                                               |                                                                                          |                                                                                                |                                                                                                                           |
| 14 | <b>Intervention:</b> Carperitide (no further details supplied)                                      |                                                                                                                                                               |                                                                                          |                                                                                                |                                                                                                                           |
| 15 | <b>Comparison:</b> No intervention                                                                  |                                                                                                                                                               |                                                                                          |                                                                                                |                                                                                                                           |
| 16 | <b>Primary outcome</b>                                                                              | <b>Treatment effect</b>                                                                                                                                       | <b>Number of participants</b>                                                            | <b>Quality of the evidence</b>                                                                 | <b>Comments</b>                                                                                                           |
| 17 | MAP                                                                                                 | Intervention group had significantly improved MAP at 48 hours. Magnitude of difference not reported, no p value presented.                                    | 16 (6 intervention, 10 control)<br>Follow-up complete for all participants.              | Retrospective cohort study.<br>Overall high risk of bias (comparability).                      | Conference abstract only. Authors did not provide further data. Small sample size (n<30)                                  |
| 18 | <b>UTERINE CURETTAGE (8 studies)</b>                                                                |                                                                                                                                                               |                                                                                          |                                                                                                |                                                                                                                           |
| 19 | Study ID: Salvatore 1967 <sup>58</sup>                                                              |                                                                                                                                                               |                                                                                          |                                                                                                |                                                                                                                           |
| 20 | <b>Population:</b> Postnatal women with severe pre-eclampsia or eclampsia                           |                                                                                                                                                               |                                                                                          |                                                                                                |                                                                                                                           |
| 21 | <b>Setting:</b> Tertiary referral (Brazil)                                                          |                                                                                                                                                               |                                                                                          |                                                                                                |                                                                                                                           |
| 22 | <b>Intervention:</b> Uterine curettage                                                              |                                                                                                                                                               |                                                                                          |                                                                                                |                                                                                                                           |
| 23 | <b>Comparison:</b> No intervention                                                                  |                                                                                                                                                               |                                                                                          |                                                                                                |                                                                                                                           |
| 24 | <b>Primary outcome</b>                                                                              | <b>Treatment effect</b>                                                                                                                                       | <b>Number of participants</b>                                                            | <b>Quality of the evidence</b>                                                                 | <b>Comments</b>                                                                                                           |
| 25 | SBP + DBP (proportion achieving target <140/90mmHg)                                                 | 24 hours: intervention group 45%, control group 11%. No statistical analysis.<br>48 hour: intervention group 70%, control group 29%. No statistical analysis. | 48 (20 intervention, 28 control)<br>Follow-up complete for all participants.             | Prospective cohort study.<br>Overall high risk of bias (comparability).                        | Significant differences in study group populations (9/20 intervention group eclamptic at enrolment, 28/28 control group). |
| 26 | Study ID: Magann 1993 <sup>59</sup>                                                                 |                                                                                                                                                               |                                                                                          |                                                                                                |                                                                                                                           |
| 27 | <b>Population:</b> Postnatal women with severe pre-eclampsia                                        |                                                                                                                                                               |                                                                                          |                                                                                                |                                                                                                                           |
| 28 | <b>Setting:</b> Tertiary referral (USA)                                                             |                                                                                                                                                               |                                                                                          |                                                                                                |                                                                                                                           |
| 29 | <b>Intervention:</b> Uterine curettage                                                              |                                                                                                                                                               |                                                                                          |                                                                                                |                                                                                                                           |
| 30 | <b>Comparison:</b> No intervention                                                                  |                                                                                                                                                               |                                                                                          |                                                                                                |                                                                                                                           |
| 31 | <b>Primary outcome</b>                                                                              | <b>Treatment effect</b>                                                                                                                                       | <b>Number of participants</b>                                                            | <b>Quality of the evidence</b>                                                                 | <b>Comments</b>                                                                                                           |
| 32 | MAP                                                                                                 | Intervention group had significantly improved MAP to 24 hours after birth. Difference 6-10mmHg (most significant at 16 hours p<0.0002).                       | 32 (16 intervention, 16 control).<br>Completeness of follow-up not specified.            | Open-label RCT.<br>Overall high risk of bias (multiple domains).                               |                                                                                                                           |
| 33 | Study ID: Magann 1994 <sup>60</sup>                                                                 |                                                                                                                                                               |                                                                                          |                                                                                                |                                                                                                                           |
| 34 | <b>Population:</b> Postnatal women with severe pre-eclampsia                                        |                                                                                                                                                               |                                                                                          |                                                                                                |                                                                                                                           |
| 35 | <b>Setting:</b> Tertiary referral (USA)                                                             |                                                                                                                                                               |                                                                                          |                                                                                                |                                                                                                                           |
| 36 | <b>Intervention:</b> Uterine curettage                                                              |                                                                                                                                                               |                                                                                          |                                                                                                |                                                                                                                           |
| 37 | <b>Comparison:</b> Oral nifedipine OR no intervention                                               |                                                                                                                                                               |                                                                                          |                                                                                                |                                                                                                                           |
| 38 | <b>Primary outcome</b>                                                                              | <b>Treatment effect</b>                                                                                                                                       | <b>Number of participants</b>                                                            | <b>Quality of the evidence</b>                                                                 | <b>Comments</b>                                                                                                           |
| 39 | MAP                                                                                                 | Intervention group had significantly improved MAP 8-48 hours after birth. Difference 9-13mmHg (p=0.0017). No difference between curettage and nifedipine.     | 45 (15 intervention, 15 each control group)<br>Completeness of follow-up not specified.  | Open-label RCT.<br>Overall high risk of bias (multiple domains).                               |                                                                                                                           |
| 40 | Study ID: Goemen 1996 <sup>57</sup>                                                                 |                                                                                                                                                               |                                                                                          |                                                                                                |                                                                                                                           |
| 41 | <b>Population:</b> Postnatal women with pre-eclampsia                                               |                                                                                                                                                               |                                                                                          |                                                                                                |                                                                                                                           |
| 42 | <b>Setting:</b> Tertiary referral (Turkey)                                                          |                                                                                                                                                               |                                                                                          |                                                                                                |                                                                                                                           |
| 43 | <b>Intervention:</b> Uterine curettage                                                              |                                                                                                                                                               |                                                                                          |                                                                                                |                                                                                                                           |
| 44 | <b>Comparison:</b> No intervention                                                                  |                                                                                                                                                               |                                                                                          |                                                                                                |                                                                                                                           |
| 45 | <b>Primary outcome</b>                                                                              | <b>Treatment effect</b>                                                                                                                                       | <b>Number of participants</b>                                                            | <b>Quality of the evidence</b>                                                                 | <b>Comments</b>                                                                                                           |
| 46 | MAP                                                                                                 | Intervention group had significantly improved MAP to 24 hours after birth. Magnitude of difference not reported (p=0.01).                                     | 50 (30 intervention, 20 control)<br>Completeness of follow-up not specified.             | Prospective cohort study.<br>Overall high risk of bias (comparability and outcome assessment). | Conference abstract only. Authors did not provide further data.                                                           |
| 47 | Study ID: Gomez 2005 <sup>61</sup>                                                                  |                                                                                                                                                               |                                                                                          |                                                                                                |                                                                                                                           |

1 **Population:** Postnatal women with severe pre-eclampsia

2 **Setting:** Tertiary referral (Peru)

3 **Intervention:** Uterine curettage

4 **Comparison:** No intervention

| Primary outcome | Treatment effect                                                                                                                | Number of participants                                                       | Quality of the evidence                                          | Comments                                                        |
|-----------------|---------------------------------------------------------------------------------------------------------------------------------|------------------------------------------------------------------------------|------------------------------------------------------------------|-----------------------------------------------------------------|
| MAP             | Intervention group had significantly improved MAP. Time point not specified.<br>Magnitude of difference not reported (p<0.001). | 86 (27 intervention, 59 control)<br>Completeness of follow-up not specified. | Open-label RCT.<br>Overall high risk of bias (multiple domains). | Conference abstract only. Authors did not provide further data. |

8 Study ID: Alkan 2006<sup>62</sup>

9 **Population:** Postnatal women with severe pre-eclampsia

10 **Setting:** Tertiary referral (Turkey)

11 **Intervention:** Uterine curettage

12 **Comparison:** No intervention

| Primary outcome | Treatment effect                                                                                      | Number of participants                                                       | Quality of the evidence                                          | Comments |
|-----------------|-------------------------------------------------------------------------------------------------------|------------------------------------------------------------------------------|------------------------------------------------------------------|----------|
| MAP             | 24 hours: Intervention group 103.4±7.8 mmHg, control group 110.2±4.8.<br>Difference 6.8mmHg (p<0.05). | 56 (31 intervention, 25 control)<br>Follow-up complete for all participants. | Open-label RCT.<br>Overall high risk of bias (multiple domains). |          |

16 Study ID: Ragab 2013<sup>15</sup>

17 **Population:** Postnatal women with severe pre-eclampsia or eclampsia

18 **Setting:** Tertiary referral (Egypt)

19 **Intervention:** Uterine curettage

20 **Comparison:** No intervention

| Primary outcome | Treatment effect                                                                                                                                                                                                      | Number of participants                                                          | Quality of the evidence                                          | Comments |
|-----------------|-----------------------------------------------------------------------------------------------------------------------------------------------------------------------------------------------------------------------|---------------------------------------------------------------------------------|------------------------------------------------------------------|----------|
| MAP             | 6 hours: Intervention group 140.1±6.12 mmHg, control group 152.4±3.7 mmHg. Difference 12.3mmHg (p=0.02).<br>24 hours: Intervention group 101.4±7.14 mmHg, control group 110.6±2.22 mmHg. Difference 9.2mmHg (p=0.01). | 420 (220 intervention, 200 control)<br>Follow-up complete for all participants. | Open-label RCT.<br>Overall high risk of bias (multiple domains). |          |

26 Study ID: Mallapur 2015<sup>18</sup>

28 **Population:** Postnatal women with severe pre-eclampsia or eclampsia

29 **Setting:** Tertiary referral (India)

30 **Intervention:** Uterine curettage

31 **Comparison:** No intervention

| Primary outcome | Treatment effect                                                                                                       | Number of participants                                                        | Quality of the evidence                                          | Comments                                                        |
|-----------------|------------------------------------------------------------------------------------------------------------------------|-------------------------------------------------------------------------------|------------------------------------------------------------------|-----------------------------------------------------------------|
| MAP             | From 4 hours after birth: Intervention group 116±4.4 mmHg, control group 123.6±6.1 mmHg. Difference 7.6mmHg (p<0.001). | 100 (50 intervention, 50 control)<br>Completeness of follow-up not specified. | Open-label RCT.<br>Overall high risk of bias (multiple domains). | Conference abstract only. Authors did not provide further data. |

### 35 ORGANISATION OF CARE (2 studies)

36 Study ID: York 1997<sup>26</sup>

38 **Population:** Postnatal women with pre-eclampsia or essential hypertension, or diabetes

39 **Setting:** Tertiary referral (USA)

40 **Intervention:** Nurse specialist follow-up

41 **Comparison:** No intervention

| Primary outcome                         | Treatment effect                          | Number of participants                                                       | Quality of the evidence                                          | Comments                                                            |
|-----------------------------------------|-------------------------------------------|------------------------------------------------------------------------------|------------------------------------------------------------------|---------------------------------------------------------------------|
| Postnatal readmission to secondary care | No significant difference between groups. | 96 (44 intervention, 52 control)<br>Completeness of follow-up not specified. | Open-label RCT.<br>Overall high risk of bias (multiple domains). | Population mixed diabetes and/or hypertension – unable to separate. |

45 Study ID: Bibbo 2014<sup>33</sup>

46 **Population:** Postnatal women with pre-eclampsia

47 **Setting:** Tertiary referral (USA)

48 **Intervention:** Specialised postpartum clinic

49 **Comparison:** No intervention

| Primary outcome                                           | Treatment effect                                       | Number of participants                                                        | Quality of the evidence                                                   | Comments                                                        |
|-----------------------------------------------------------|--------------------------------------------------------|-------------------------------------------------------------------------------|---------------------------------------------------------------------------|-----------------------------------------------------------------|
| Postnatal readmission to secondary care and triage visits | Intervention group 21.7%; control group 8.7% (p<0.039) | 138 (69 intervention, 69 control)<br>Completeness of follow-up not specified. | Retrospective cohort study.<br>Overall high risk of bias (comparability). | Conference abstract only. Authors did not provide further data. |



**Appendix S6: Risk of bias in included studies (n=38)****Appendix S6a: Risk of bias in included RCTs and quasi-randomised studies (n=31)**

| Study ID                            | Random sequence generation | Allocation concealment | Blinding of participants and personnel | Blinding of outcome assessment | Incomplete outcome data | Selective reporting | Other bias |
|-------------------------------------|----------------------------|------------------------|----------------------------------------|--------------------------------|-------------------------|---------------------|------------|
| <b>ANTIHYPERTENSIVE MEDICATIONS</b> |                            |                        |                                        |                                |                         |                     |            |
| Fidler 1982 <sup>42</sup>           | Unclear                    | Unclear                | Unclear                                | Unclear                        | High                    | High                | Low        |
| Garden 1982 <sup>24</sup>           | Unclear                    | Unclear                | Unclear                                | Unclear                        | Low                     | Unclear             | High       |
| Mabie 1987 <sup>22</sup>            | Unclear                    | Unclear                | High                                   | High                           | Low                     | Low                 | High       |
| Griffis 1989 <sup>38 39</sup>       | Unclear                    | Low                    | High                                   | High                           | High                    | High                | High       |
| Barton 1990 <sup>32</sup>           | Low                        | Low                    | Low                                    | Low                            | Low                     | Low                 | Low        |
| Walss Rodriguez 1991 <sup>40</sup>  | Low                        | Low                    | High                                   | High                           | Unclear                 | Unclear             | Low        |
| Vermillion 1999 <sup>21</sup>       | Low                        | Low                    | Low                                    | Low                            | Low                     | Low                 | High       |
| Begum 2002 <sup>17</sup>            | High                       | High                   | High                                   | High                           | Unclear                 | Unclear             | High       |
| Sayin 2005 <sup>34</sup>            | Unclear                    | Unclear                | High                                   | High                           | Low                     | Unclear             | High       |
| Hennessy 2007 <sup>23</sup>         | Unclear                    | Low                    | High                                   | High                           | Low                     | Low                 | High       |
| Vigil-de-Gracia 2007 <sup>35</sup>  | Low                        | Low                    | High                                   | High                           | Low                     | Low                 | Low        |
| Gaisin 2013 <sup>25</sup>           | Unclear                    | Unclear                | High                                   | High                           | Unclear                 | High                | High       |
| Gaisin 2014 <sup>37</sup>           | Unclear                    | Unclear                | High                                   | High                           | Unclear                 | Unclear             | High       |
| Noronha Neto 2016 <sup>29-31</sup>  | Low                        | Low                    | Low                                    | Unclear                        | Low                     | Low                 | Low        |
| Sharma 2017 <sup>27 28</sup>        | Low                        | Low                    | High                                   | High                           | Unclear                 | Low                 | Low        |
| <b>DIURETICS</b>                    |                            |                        |                                        |                                |                         |                     |            |
| Matthews 1997 <sup>46</sup>         | Unclear                    | Low                    | Low                                    | Low                            | Low                     | Unclear             | High       |
| Ascarelli 2005 <sup>16</sup>        | Unclear                    | Low                    | High                                   | High                           | Unclear                 | High                | Low        |
| Amorim 2015 <sup>45</sup>           | Low                        | Low                    | Low                                    | Low                            | Low                     | High                | Low        |
| Veena 2017 <sup>19</sup>            | Low                        | Low                    | High                                   | High                           | Unclear                 | Unclear             | Unclear    |
| <b>OTHER DRUGS</b>                  |                            |                        |                                        |                                |                         |                     |            |
| Weiner 1982 <sup>48</sup>           | Unclear                    | Unclear                | Low                                    | Low                            | Unclear                 | Unclear             | High       |
| Weiner 1984 <sup>49</sup>           | Low                        | Unclear                | Low                                    | Low                            | Low                     | Unclear             | High       |
| Montenegro 1985 <sup>50</sup>       | Unclear                    | Unclear                | Low                                    | Low                            | High                    | High                | High       |
| Barrilleaux 2005 <sup>53 54</sup>   | Low                        | Low                    | Low                                    | Low                            | Low                     | High                | High       |
| Hladunewich 2006 <sup>51</sup>      | Low                        | Low                    | Low                                    | Low                            | High                    | High                | High       |
| Liu 2009 <sup>52</sup>              | High                       | High                   | High                                   | High                           | High                    | Unclear             | High       |
| <b>UTERINE CURETTAGE</b>            |                            |                        |                                        |                                |                         |                     |            |
| Magann 1993 <sup>59</sup>           | Low                        | Low                    | High                                   | High                           | Unclear                 | Unclear             | Low        |
| Magann 1994 <sup>60</sup>           | Low                        | Unclear                | High                                   | High                           | Unclear                 | Unclear             | Low        |
| Gomez 2005 <sup>61</sup>            | Unclear                    | Unclear                | High                                   | High                           | Unclear                 | High                | Low        |
| Alkan 2006 <sup>62</sup>            | Unclear                    | Unclear                | High                                   | High                           | Low                     | High                | High       |
| Ragab 2013 <sup>15</sup>            | Low                        | Low                    | High                                   | High                           | Low                     | Low                 | Low        |
| Mallapur 2015 <sup>18</sup>         | Low                        | Unclear                | High                                   | High                           | Unclear                 | Unclear             | High       |
| <b>ORGANISATION OF CARE</b>         |                            |                        |                                        |                                |                         |                     |            |
| York 1997 <sup>26</sup>             | Unclear                    | Low                    | High                                   | High                           | Unclear                 | Unclear             | High       |

## Appendix S6b: Risk of bias in included cohort studies (n=7)

| Study ID                            | Selection                        |                                       |                                        |                                          | Comparability <sup>1</sup> | Outcome                 |                 |                              |
|-------------------------------------|----------------------------------|---------------------------------------|----------------------------------------|------------------------------------------|----------------------------|-------------------------|-----------------|------------------------------|
|                                     | Representative-ness <sup>2</sup> | Selection of non-exposed <sup>3</sup> | Ascertainment of exposure <sup>4</sup> | Outcome of interest not present at start |                            | Assessment <sup>5</sup> | F/U long enough | Adequacy of F/U <sup>6</sup> |
| <b>ANTIHYPERTENSIVE MEDICATIONS</b> |                                  |                                       |                                        |                                          |                            |                         |                 |                              |
| Krebs 1956 <sup>43 44</sup>         | Low (a)                          | Low (a)                               | Unclear (d)                            | Low (Yes)                                | Low (a)                    | High (b)                | Low (Yes)       | Unclear (d)                  |
| Palot 1979 <sup>36</sup>            | Unclear (d)                      | Low (a)                               | Unclear (d)                            | Low (Yes)                                | High (Neither)             | Unclear (d)             | Low (Yes)       | Unclear (d)                  |
| Shumard 2016 <sup>41</sup>          | Low (a)                          | Low (a)                               | Low (a)                                | Low (Yes)                                | High (Neither)             | Low (a)                 | Low (Yes)       | Low (a)                      |
| <b>OTHER DRUGS</b>                  |                                  |                                       |                                        |                                          |                            |                         |                 |                              |
| Shigemitsu 2015 <sup>47</sup>       | Unclear (d)                      | Unclear (c)                           | Low (a)                                | Low (Yes)                                | High (Neither)             | Low (a)                 | Low (Yes)       | Unclear (d)                  |
| <b>UTERINE CURETTAGE</b>            |                                  |                                       |                                        |                                          |                            |                         |                 |                              |
| Salvatore 1967 <sup>58</sup>        | High (b)                         | High (b)                              | Low (a)                                | Low (Yes)                                | High (Neither)             | Low (a)                 | Low (Yes)       | Low (a)                      |
| Gocmen 1996 <sup>57</sup>           | Unclear (d)                      | Unclear (c)                           | Unclear (d)                            | Low (Yes)                                | High (Neither)             | Unclear (d)             | High (No)       | Unclear (d)                  |
| <b>ORGANISATION OF CARE</b>         |                                  |                                       |                                        |                                          |                            |                         |                 |                              |
| Bibbo 2014 <sup>33</sup>            | Unclear (d)                      | Unclear (c)                           | Unclear (d)                            | Low (Yes)                                | High (Neither)             | Unclear (d)             | Low (Yes)       | Unclear (d)                  |

<sup>1</sup> (a) study controls for most important factor; (b) study controls for any additional factor

<sup>2</sup> (a) truly representative of the average in the community; (b) somewhat representative of the average in the community; (c) selected group of users e.g. nurses, volunteers; (d) no description of the derivation of the cohort

<sup>3</sup> (a) drawn from the same community as the exposed cohort; (b) drawn from a different source; (c) no description of the derivation of the non-exposed cohort

<sup>4</sup> (a) secure record (e.g. surgical record); (b) structured interview; (c) written self-report; (d) no description

<sup>5</sup> (a) independent blind assessment; (b) record linkage; (c) self-report; (d) no description

<sup>6</sup> (a) complete follow-up; (b) subjects lost to follow-up unlikely to introduce bias (>90% follow-up rate); (c) follow up rate <90% and no description of those lost; (d) no statement

# BMJ Open

## Postpartum management of hypertensive disorders of pregnancy: a systematic review

|                                 |                                                                                                                                                                                                                                                                                                                                                                                                                                                                                                                                                                                                                                                                                                                                                                                                      |
|---------------------------------|------------------------------------------------------------------------------------------------------------------------------------------------------------------------------------------------------------------------------------------------------------------------------------------------------------------------------------------------------------------------------------------------------------------------------------------------------------------------------------------------------------------------------------------------------------------------------------------------------------------------------------------------------------------------------------------------------------------------------------------------------------------------------------------------------|
| Journal:                        | <i>BMJ Open</i>                                                                                                                                                                                                                                                                                                                                                                                                                                                                                                                                                                                                                                                                                                                                                                                      |
| Manuscript ID                   | bmjopen-2017-018696.R1                                                                                                                                                                                                                                                                                                                                                                                                                                                                                                                                                                                                                                                                                                                                                                               |
| Article Type:                   | Research                                                                                                                                                                                                                                                                                                                                                                                                                                                                                                                                                                                                                                                                                                                                                                                             |
| Date Submitted by the Author:   | 02-Oct-2017                                                                                                                                                                                                                                                                                                                                                                                                                                                                                                                                                                                                                                                                                                                                                                                          |
| Complete List of Authors:       | Cairns, Alexandra; University of Oxford Medical Sciences Division, Nuffield Department of Primary Care Health Sciences<br>Pealing, Louise; University of Oxford Medical Sciences Division, Nuffield Department of Primary Care Health Sciences<br>Duffy, James; University of Oxford Medical Sciences Division, Nuffield Department of Primary Care Health Sciences<br>Roberts, Nia; University of Oxford, UK, Bodleian Health Care Libraries,<br>Tucker, Katherine; University of Oxford, Nuffield Department of Primary Care<br>Leeson, Paul; University of Oxford, Division of Cardiovascular Medicine<br>MacKillop, Lucy; Oxford University Hospitals NHS Trust, Nuffield Department of Obstetrics & Gynaecology<br>McManus, Richard; University of Oxford, Dept of Primary Care Health Sciences |
| <b>Primary Subject Heading</b>: | Obstetrics and gynaecology                                                                                                                                                                                                                                                                                                                                                                                                                                                                                                                                                                                                                                                                                                                                                                           |
| Secondary Subject Heading:      | Evidence based practice                                                                                                                                                                                                                                                                                                                                                                                                                                                                                                                                                                                                                                                                                                                                                                              |
| Keywords:                       | Preeclampsia, Gestational hypertension, Postpartum, Hypertensive disorders of pregnancy, Antihypertensive medication, Systematic review                                                                                                                                                                                                                                                                                                                                                                                                                                                                                                                                                                                                                                                              |
|                                 |                                                                                                                                                                                                                                                                                                                                                                                                                                                                                                                                                                                                                                                                                                                                                                                                      |

SCHOLARONE™  
Manuscripts

# 1 Postpartum management of hypertensive disorders of 2 pregnancy: a systematic review

3 Dr Alexandra E. Cairns MA Hons (Oxon) BMBCh MRCOG<sup>1</sup>, Dr Louise Pealing MA Hons (Cantab)  
4 MSc MBBS MRCP MRCGP<sup>1</sup>, Dr James M.N. Duffy MBChB MRes BSc (Hons) PG HCL<sup>1</sup>, Nia Roberts  
5 MSc Econ<sup>2</sup>, Dr Katherine L. Tucker PhD<sup>1</sup>, Professor Paul Leeson PhD MBBChir BSc (Hons) FRCP<sup>3</sup>,  
6 Dr Lucy H. Mackillop MA (Oxon) BMBCh FRCP<sup>4</sup>, Professor Richard J. McManus PhD MA MBBS  
7 FRCGP FRCP<sup>1</sup>

8 <sup>1</sup> Nuffield Department of Primary Care Health Sciences, University of Oxford, Oxford, United  
9 Kingdom.

10 <sup>2</sup> Knowledge Centre, Bodleian Libraries, University of Oxford, Oxford, United Kingdom.

11 <sup>3</sup> Cardiovascular Clinical Research Facility, Division of Cardiovascular Medicine, Radcliffe  
12 Department of Medicine, University of Oxford, Oxford, United Kingdom.

13 <sup>4</sup> Nuffield Department of Obstetrics and Gynaecology, University of Oxford, Oxford, United  
14 Kingdom.

15 **Corresponding author:** Dr Alexandra E. Cairns BMBCh MA Hons (Oxon) MRCOG

16 alexandra.cairns@phc.ox.ac.uk

17 +44 (0) 1865 617960

18 Nuffield Department of Primary Care Health Sciences, University of  
19 Oxford, Radcliffe Primary Care, Radcliffe Observatory Quarter,  
20 Woodstock Road, Oxford, OX2 6GG, United Kingdom.

21 **Short title:** Postnatal Hypertension Management

22 **Competing interests statement:** None of the authors has any conflicts of interest to declare.

## 23 **Abstract**

### 24 **Objectives**

25 Hypertensive disorders of pregnancy (HDP) affect one in ten pregnancies and often persist  
26 postpartum when complications can occur. We aimed to determine the effectiveness and  
27 safety of pharmacologic interventions, other interventions, and different care models for  
28 postpartum hypertension management.

### 29 **Design**

30 A systematic review was undertaken. Nine electronic databases, including Medline, were  
31 searched from inception to 16/03/2017. After duplicate removal, 4,561 records were  
32 screened. Two authors independently selected studies, extracted study characteristics and  
33 data, and assessed methodological quality.

### 34 **Setting**

35 Randomised controlled trials, case-control studies, and cohort studies from any country and  
36 healthcare setting.

### 37 **Participants**

38 Postnatal women with HDP.

### 39 **Interventions**

40 Therapeutic intervention for management of hypertension, compared with another  
41 intervention, placebo, or no intervention.

### 42 **Primary and secondary outcome measures**

43 Outcome data were collected for maternal mortality and severe morbidity; systolic, diastolic  
44 and mean arterial blood pressure (BP) control; and safety data. Secondary outcome data  
45 collected included the length of postnatal hospital stay and laboratory values.

### 46 **Results**

47 39 studies were included (n=2,901). Results were heterogeneous in terms of intervention,  
48 comparison and outcome requiring a narrative approach. There were insufficient data to  
49 recommend any single pharmacologic intervention. 18 studies reported calcium-channel  
50 blockers, vasodilators and beta-blockers lowered BP postpartum. 12 of these reported safety  
51 data. Limited data existed regarding management in the weeks following hospital discharge.  
52 Neither loop diuretics (three studies) nor corticosteroids (one study) produced clinical benefit.

1  
2  
3 53 Uterine curettage significantly reduced BP over the first 48 hours postpartum (range 6-  
4 54 13mmHg) compared to standard care (eight studies), with safety data only reported by 4/8  
5 55 studies.  
6  
7

## 8 9 56 **Conclusion**

10 57 There was insufficient evidence to recommend a particular BP threshold, agent, or model of  
11 58 care but three classes of antihypertensive appeared variably effective. Further comparative  
12 59 research, including robust safety data, is required. Curettage reduced BP, but without  
13 60 adequate reporting of harms, so cannot currently be recommended.  
14  
15  
16  
17

## 18 19 61 **Strengths and limitations of this study**

- 20 62 • All types of intervention for the management of postpartum hypertension – medical,  
21 63 surgical and organisation of care – were eligible for inclusion in this review.  
22  
23  
24 64 • Randomised controlled studies plus other experimental study designs (cohort studies,  
25 65 case-control studies and quasi-randomised studies) were included and no limitations  
26 66 were imposed in terms of language or publication date, resulting in a comprehensive  
27 67 review.  
28  
29  
30 68 • This review highlights significant evidence gaps, demonstrating that further  
31 69 comparative research is required, particularly to clarify postpartum antihypertensive  
32 70 selection.  
33  
34 71 • Although 39 studies were included, the majority had a high risk of bias such that the  
35 72 evidence provided by this review is of low quality.  
36  
37  
38 73 • The 39 studies reported a broad range of heterogeneous outcomes, limiting  
39 74 meaningful comparison.  
40  
41  
42  
43  
44  
45  
46

## 47 75 **Keywords**

48 76 Preeclampsia, gestational hypertension, postpartum, hypertensive disorders of pregnancy,  
49 77 antihypertensive medication, systematic review  
50  
51  
52

## 53 54 78 **Abbreviations**

55 79 BP Blood pressure  
56  
57  
58  
59  
60

- 1  
2  
3 80 HDP Hypertensive disorders of pregnancy  
4  
5 81 MAP Mean arterial pressure  
6  
7  
8 82 NICE National Institute of Health and Care Excellence  
9  
10 83 RCT Randomised controlled trial  
11  
12 84 SSRI Selective serotonin reuptake inhibitor  
13  
14  
15 85  
16  
17  
18  
19  
20  
21  
22  
23  
24  
25  
26  
27  
28  
29  
30  
31  
32  
33  
34  
35  
36  
37  
38  
39  
40  
41  
42  
43  
44  
45  
46  
47  
48  
49  
50  
51  
52  
53  
54  
55  
56  
57  
58  
59  
60

## 86 **Introduction**

87 Hypertensive disorders of pregnancy (HDP) often persist following delivery,<sup>1</sup> and  
88 occasionally arise de novo postpartum.<sup>2</sup> In both scenarios adverse events can occur during  
89 this period. Approximately one-third of eclampsia occurs postpartum, nearly half beyond 48  
90 hours after childbirth.<sup>3-5</sup> Half of the women who sustain an intracerebral haemorrhage in  
91 association with preeclampsia do so following birth.<sup>6</sup> Women may enter the postnatal period  
92 requiring large doses of antihypertensive medication, but the majority will be treatment-free  
93 by three to six months.<sup>1 7</sup> This rapidly changing blood pressure (BP) poses a challenge in  
94 terms of appropriate antihypertensive selection and dose adjustment.

95 The National Institute for Health and Care Excellence (NICE) recommends frequent  
96 postnatal BP monitoring for women with both preeclampsia (every one to two days for two  
97 weeks) and gestational hypertension (at least once between day three and five).<sup>8</sup> The  
98 guideline stipulates thresholds for the increase or commencement ( $\geq 150/100$ mmHg) and the  
99 reduction or cessation (consider  $< 140/90$ mmHg and reduce  $< 130/80$ mmHg) of  
100 antihypertensive medication after birth. However, little detail is provided about frequency or  
101 proportion of dose reduction or how to manage multiple medications.<sup>8</sup> The American College  
102 of Obstetricians and Gynecologists recommend that BP be monitored in hospital (or with an  
103 equivalent level of outpatient surveillance) for 72 hours after birth, and checked again seven  
104 to ten days postpartum (sooner if a woman is symptomatic).<sup>9</sup> In line with NICE, they propose  
105 treating BP when  $\geq 150/100$ mmHg, but add this should be on two measures, four to six hours  
106 apart. They make no suggestion regarding BP thresholds for medication reduction, implying  
107 uncertainty about when to decrease or stop treatment.

108 A Cochrane review (search date January 2013) evaluated medical interventions for  
109 prevention and treatment of postnatal hypertension. This was limited to randomised  
110 controlled trials (RCTs) and included only nine studies.<sup>10</sup> Given the paucity of evidence  
111 available, due to Cochrane's restriction to randomised trials alone, we have undertaken an  
112 updated systematic review of the postpartum management of hypertension in women with  
113 HDP with a broader scope: including the full range of interventions studied, and  
114 incorporating cohort and case-control studies, alongside RCTs. Our specific questions were:  
115 [1] How should BP be monitored in women with HDP postpartum? [2] What BP thresholds  
116 should be used for antihypertensive treatment initiation, adjustment and cessation  
117 postpartum? [3] Which antihypertensive medication(s) should be used in postpartum in



1  
2  
3 118 women with HDP? [4] What are the benefits and harms of other therapeutic interventions for  
4  
5 119 women with HDP postpartum?  
6  
7

## 8 **Material and methods**

9  
10 121 A protocol, with explicitly defined objectives, study selection criteria, and approaches to  
11  
12 122 assessing study quality, outcomes and statistical methods, was developed (Appendix S1).  
13  
14 123 This was registered with PROSPERO: International Prospective Register of Systematic  
15  
16 124 Reviews (CRD42015015527) and is available online  
17  
18 125 ([http://www.crd.york.ac.uk/PROSPERO/display\\_record.asp?ID=CRD42015015527](http://www.crd.york.ac.uk/PROSPERO/display_record.asp?ID=CRD42015015527)). We  
19  
20 126 followed the guidelines for meta-analyses and systematic reviews outlined by the Preferred  
21  
22 127 Reporting Items for Systematic Reviews and Meta-Analyses (PRISMA) statement (Appendix  
23  
24 128 S2).<sup>11</sup>

25  
26 129 A systematic literature review was undertaken to capture evidence from human studies  
27  
28 130 regarding postpartum hypertension management in women with HDP, without restriction by  
29  
30 131 language or publication date (Appendix S1). We searched the following databases, from  
31  
32 132 inception to 16/03/2017: Cochrane Database of Systematic Reviews (CDSR), Database of  
33  
34 133 Abstracts of Reviews of Effects (DARE) and Cochrane Central Register of Controlled Trials  
35  
36 134 (CENTRAL), Cumulative Index to Nursing and Allied Health Literature (CINAHL),  
37  
38 135 Embase, Medline, PsycINFO, Science Citation Index, Science (Web of Science Core  
39  
40 136 Collection), Social Science Citation Index & Conference Proceedings Citation Index. We  
41  
42 137 hand-searched reference lists and contacted relevant experts for potentially relevant studies,  
43  
44 138 which might have been missed by electronic searches.<sup>12</sup>

45  
46 139 We included RCTs, quasi-randomised studies, case-control studies, prospective and  
47  
48 140 retrospective cohort studies, assessing interventions for hypertension management  
49  
50 141 postpartum in women with HDP (gestational hypertension, pre-eclampsia, chronic  
51  
52 142 hypertension and super-imposed pre-eclampsia) arising both during pregnancy and de novo  
53  
54 143 in the postnatal period. Consistent with guidance from Cochrane, conference abstracts were  
55  
56 144 included.<sup>5</sup>

57  
58 145 Two reviewers (AC/LP) independently screened the titles and abstracts, and then critically  
59  
60 146 reviewed the full text of selected studies to assess eligibility. Discrepancies were resolved by  
147  
148 147 discussion before independent extraction of relevant data by the two reviewers. For trials with  
multiple intervention arms, we extracted data from eligible comparison arms. Data were

1  
2  
3 149 extracted for the primary and secondary outcomes outlined in Table 1. Due to the  
4 150 heterogeneous nature of these studies, a narrative synthesis was undertaken.

5  
6  
7 151 Two reviewers (AC/LP) independently assessed each trial's methodological quality using the  
8 152 Cochrane Collaboration's tool for assessing the risk of bias in RCTs,<sup>13</sup> and the Newcastle-  
9 153 Ottawa scale for case-control and cohort studies.<sup>14</sup> A global assessment of bias across trials  
10 154 was made.

## 15 155 **Results**

16  
17 156 Our searches yielded 7,105 records and after excluding duplicates, 4,561 titles and abstracts  
18 157 were screened (Figure 1). 80 full-text articles were assessed: 35 articles were excluded  
19 158 (Appendix S3). 45 articles, representing 39 studies (32 randomised trials, two prospective  
20 159 cohort studies, and five retrospective cohort studies) reporting data from 2,901 postnatal  
21 160 participants met our inclusion criteria (Appendix S4). 9/39 (23%) were published only as  
22 161 conference abstracts. No further details were made available following author contact.

23  
24  
25  
26  
27  
28 162 A range of interventions was assessed including antihypertensive medications (18 studies,  
29 163 n=982), loop diuretics (four studies, n=503), parenteral steroids (one study, n=157), other  
30 164 medications (six studies, n=188), uterine curettage (eight studies, n=837) and novel models of  
31 165 care (two studies, n=234). 9/39 (23%) included  $\geq 100$  participants, and only two studies  
32 166 included  $\geq 200$  participants.<sup>15 16</sup> Four were from lower-middle-income settings<sup>15 17-19</sup>  
33 167 (classified according to the United Nations<sup>20</sup>), and 13/39 (33%) studies had follow-up periods  
34 168 longer than seven days (Appendix S4). Only 5/39 (13%) and 7/39 (18%) studies,  
35 169 respectively, reported maternal mortality or major maternal morbidity, and whilst the  
36 170 majority of studies did report some measure of BP control, three did not (Tables 2a&b).  
37 171 19/39 (49%) studies reported safety data (Tables 2a&b).

38  
39  
40  
41  
42  
43  
44  
45 172 5/39 (13%) studies (all evaluating antihypertensive medications) involved mixed antenatal  
46 173 and postnatal populations<sup>17 21-24</sup>. Authors were contacted to request their dataset for the  
47 174 postnatal participants, but no data were made available. 6/39 (15%) studies included  
48 175 participants with chronic hypertension alongside women with de novo HDP (gestational  
49 176 hypertension or pre-eclampsia).<sup>22 23 25-31</sup> 12/39 (31%) studies included women with eclampsia  
50 177 – in one all participants were eclamptic (Appendix S5).<sup>17</sup>

51  
52  
53  
54  
55  
56 178 30/32 (94%) included RCTs were judged to be at high overall risk of bias, by both reviewers,  
57 179 according to the Cochrane tool, 23/32 (72%) for multiple domains. Only 2/32 (6%) were

1  
2  
3 180 thought to be clearly at low risk of bias.<sup>29-32</sup> All included cohort studies were deemed to have  
4 181 a high risk of bias in at least one domain of the Newcastle-Ottawa scale (Appendix S6).

7 182 **How should blood pressure be monitored postpartum in women with hypertensive**  
8 183 **disorders of pregnancy?**

10 184 No studies specifically addressed the frequency or method of postnatal BP monitoring. Two  
11 185 evaluated the impact of postpartum care organisation (n=234), using the postnatal  
12 186 readmission rate as their primary outcome (Appendix S4). Neither reported maternal  
13 187 mortality or morbidity, safety data nor any measure of BP control (Table 2b).<sup>26 33</sup>

17 188 One assessed introduction of a specialised postpartum clinic (no further details were given)  
18 189 and demonstrated an increased postnatal readmission and triage visit rate (22% intervention  
19 190 group, 9% control group: difference 13%,  $p<0.04$ ) although 86% occurred before a  
20 191 participant was seen in the clinic.<sup>33</sup> The second study evaluated specialist nurse follow-up,  
21 192 including home visits and telephone contact, and reported no significant difference in the  
22 193 postnatal readmission rate compared to standard care.<sup>26</sup>

28 194 **What blood pressure thresholds should be used for antihypertensive treatment**  
29 195 **initiation, adjustment and cessation postpartum?**

30 196 No relevant studies identified.

34 197 **Which antihypertensive medication(s) should be used postpartum in women with**  
35 198 **hypertensive disorders of pregnancy?**

36 199 14 randomised trials (n=645), one quasi-randomised trial (n=15), and three retrospective  
37 200 cohort studies (n=322) evaluated antihypertensive medications (Appendix S4). Only three  
38 201 studies reported maternal mortality,<sup>29-31 34 35</sup> and three reported maternal morbidity: no  
39 202 differences between groups were reported (Table 2a).<sup>29-31 35 36</sup> 12 studies reported safety data,  
40 203 in comparisons between multiple classes of antihypertensive agents (Table 2a): no clear  
41 204 differences were established, although one study found a greater number of minor side effects  
42 205 reported with oral nifedipine than with oral labetalol.<sup>27 28</sup>

49 206 The vast majority of included studies evaluated either acute control of severe hypertension  
50 207 (7/18, 39%), or BP control in the few days after delivery, whilst women remained hospital  
51 208 inpatients (8/18, 44%). Only three studies, two published only as conference abstracts,  
52 209 evaluated BP control in the weeks and months following hospital discharge.<sup>25 27 28 37</sup>

### 210 **Calcium-channel blockers**

211 Three small studies examined oral nifedipine (n=135): nifedipine resulted in a greater  
212 decrease in MAP 18-24 hours after childbirth than placebo (intervention group  
213 93.9±1.6mmHg, control group 100.2±2.6mmHg, difference 6.3mmHg,  $p<0.05$ ), but not at  
214 other time points to 48 hours (one RCT, n=31).<sup>32</sup> Nifedipine controlled severe hypertension  
215 to <160/100mmHg more quickly than labetalol (intervention group 25.1±13.6 minutes,  
216 control group 43.6±25.4 minutes: difference 18.5 minutes,  $p=0.002$ ; one RCT, n=21).<sup>21</sup> A  
217 single RCT (n=83), reported no significant difference in time taken to control BP to  
218 <150/100mmHg when comparing nifedipine with methyldopa.<sup>34</sup>

### 219 **Vasodilators**

220 Six studies looked at the use of vasodilators (n=252). All utilised hydralazine via a range of  
221 administration routes. Bolus intravenous hydralazine controlled severe hypertension more  
222 quickly than continuous infusion (intervention group 65.23±23.38 minutes, control group  
223 186.36±79.77 minutes: difference -121.13 minutes,  $p<0.001$ ); one quasi-randomised study,  
224 n=15 (postnatal)).<sup>17</sup> Intramuscular hydralazine produced a more significant improvement in  
225 MAP at six hours than intravenous methyldopa (intervention group 104.5mmHg, control  
226 group 112mmHg: difference -7.5mmHg  $p=0.0057$ ) but not at other time points to 24 hours  
227 (one RCT, n=26).<sup>38 39</sup> There was no difference in BP control when comparing oral  
228 hydralazine with oral nifedipine (one RCT, n=38), or intravenous labetalol (one RCT,  
229 n=82).<sup>35 40</sup>

230 Bolus diazoxide was significantly more effective in achieving a target BP of  $\leq 140/90$ mmHg  
231 than intravenous hydralazine (intervention group 67%, control group 43%: RR 0.64, 95% CI  
232 0.46-0.89; one RCT, n=37 (postnatal)).<sup>23</sup> One retrospective cohort study did not present any  
233 statistical analysis.<sup>36</sup>

### 234 **Beta-blockers**

235 Five studies assessed the efficacy of beta-blockers (four RCTs and one retrospective cohort  
236 study, n=305). Two RCTs compared intravenous labetalol with intravenous  
237 hydralazine/dihydralazine: one involved only six postnatal women and presented no  
238 statistical analysis of the data.<sup>24</sup> The other found a significantly greater mean maximal  
239 decrease in MAP with intravenous labetalol (intervention group 25.5±11.2mmHg, control  
240 group 33.3±13.2mmHg: difference -7.8mmHg,  $p=0.02$ ; one RCT, n=32 (postnatal)).<sup>22</sup>  
241 Results conflicted regarding whether oral labetalol was more or less effective than oral

1  
2  
3 242 nifedipine: a cohort study reported that labetalol controlled BP less rapidly than nifedipine  
4 243 (intervention group 2.7 days, control group 1.7 days: difference 1.0 days,  $p=0.0031$ ; one  
5 244 retrospective cohort study,  $n=128$ ).<sup>41</sup> However, this result was not replicated by an RCT,  
6 245 where the time to BP control was similar in the two groups ( $n=50$ ).<sup>27 28</sup> Neither study  
7 246 demonstrated a difference in the postnatal length of stay ( $n=178$ ). Timolol was effective in  
8 247 decreasing diastolic BP on day one postnatal when compared with methyldopa (intervention  
9 248 group 88.7mmHg, control group 93.8mmHg: difference -5.1mmHg;  $p<0.05$ ; one RCT,  
10 249  $n=80$ ).<sup>42</sup>

### 17 250 *Other antihypertensive medications*

18 251 No statistically significant difference was found between oral clonidine and oral captopril in  
19 252 the incidence of episodes of severe hypertension postpartum (one RCT,  $n=90$ ).<sup>29-31</sup> Two  
20 253 RCTs evaluating indapamide versus methyldopa found no difference in BP control over 6-12  
21 254 months postpartum ( $n=60$ ).<sup>25 37</sup> One retrospective cohort study ( $n=140$ ) compared reserpine  
22 255 with phenobarbital: the results suggested that reserpine might achieve faster and greater BP  
23 256 reduction (data extracted from graphs; no statistical analysis). No adverse events were  
24 257 reported in the intervention group.<sup>43 44</sup>

### 31 258 **What are the benefits and harms of other therapeutic interventions for women with** 32 259 **hypertensive disorders of pregnancy postpartum?**

#### 35 260 *Loop Diuretics*

36 261 Four RCTs ( $n=503$ ) examined loop diuretics versus placebo or usual care in postpartum  
37 262 hypertension management in women with HDP. None reported maternal mortality or safety  
38 263 data. Only two reported major maternal morbidity, neither demonstrating a difference  
39 264 between groups (Table 2b).<sup>16 19</sup>

40 265 One RCT ( $n=120$ ) reported significant improvement in the primary outcome of mean systolic  
41 266 and diastolic BP with oral furosemide versus placebo (magnitude of difference or time points  
42 267 of measurements not stated,  $p<0.001$ ).<sup>45</sup> This was not the case in the other placebo-controlled  
43 268 RCT, which found no significant difference ( $n=19$ ).<sup>46</sup> Two further RCTs ( $n=364$ ) found no  
44 269 significant difference in BP control with oral furosemide versus usual care.<sup>16 19</sup> In one of  
45 270 these, subgroup analysis of women with severe preeclampsia ( $n=70$ ) found women who  
46 271 received oral furosemide had a significantly lower systolic BP day 2 postpartum (intervention  
47 272 group  $142\pm 13$ mmHg, control group  $153\pm 19$ mmHg: difference -11mmHg,  $p<0.004$ ), but not  
48 273 at other time points.<sup>16</sup> In the other trial ( $n=100$ ), furosemide reduced the need for additional

1  
2  
3 274 antihypertensive treatment during the three days of therapy (intervention group 8.0%, control  
4 275 group 26.0% difference 18%,  $p=0.017$ ), but this difference did not persist to hospital  
5 276 discharge.<sup>19</sup>  
6  
7

8  
9 277 **Other drugs**

10 278 Five RCTs, one quasi-randomised study and one retrospective cohort study investigated the  
11 279 utility of different drug classes in HDP postpartum (Appendix S5). Three studies reported  
12 280 safety data, but only one reported maternal mortality, demonstrating no difference between  
13 281 groups,<sup>47</sup> and none reported major maternal morbidity (Table 2b).  
14  
15  
16

17 282 Three small, crossover RCTs examined the use of selective serotonin receptor inhibitors  
18 283 (SSRIs) compared with placebo (n=55). All studies showed a significant reduction in BP with  
19 284 SSRIs compared to placebo (range 25.6 – 34mmHg).<sup>48-50</sup> These data suggest efficacy for this  
20 285 drug class in hypertension management but do not provide any information regarding relative  
21 286 effectiveness compared to standard antihypertensive drugs. Only one study reported safety  
22 287 data: although no statistical analysis was performed, there were a number of side effects  
23 288 reported in the intervention group.<sup>49</sup>  
24  
25  
26  
27  
28  
29

30 289 Two studies evaluated alternative therapies (n=117): there was no difference in BP control  
31 290 with L-arginine supplementation compared with placebo (one RCT, n=45).<sup>51</sup> One reported  
32 291 accelerated recovery of albuminuria with the administration of shengkangbao (Chinese herbal  
33 292 medicine) versus placebo (one quasi-randomised study, n=72). However, the clinical  
34 293 relevance of this outcome is uncertain, there was no difference between groups in the  
35 294 secondary outcomes of systolic BP, diastolic BP or serum creatinine and no safety data were  
36 295 reported.<sup>52</sup>  
37  
38  
39  
40  
41  
42

43 296 A single RCT assessed corticosteroids in the management of severe preeclampsia postpartum  
44 297 (n=157).<sup>53 54</sup> No difference was demonstrated between groups in the primary outcome of  
45 298 antihypertensive medication requirement, or in the secondary outcomes of mean arterial  
46 299 pressure (MAP) or need for critical care admission, and no safety data were reported. There  
47 300 were small, statistically significant differences found in some laboratory values (platelet  
48 301 count, lactate dehydrogenase and aspartate transaminase). However, the authors  
49 302 acknowledged that the absolute differences were too small to be clinically relevant.<sup>53</sup>  
50  
51  
52  
53  
54

55 303 A very small retrospective cohort study suggested an improvement in MAP with the addition  
56 304 of carperitide (atrial natriuretic peptide) to standard therapy (n=16), and no adverse effects  
57  
58  
59  
60

1  
2  
3 305 related to the intervention were reported.<sup>47</sup> However, the magnitude of the difference was not  
4  
5 306 published, and the study was too small to draw any firm conclusions.

### 7 307 *Uterine curettage*

8  
9 308 Six RCTs and two prospective cohort studies (n=837) have explored the role of uterine  
10  
11 309 curettage in postpartum hypertension management. Uterine curettage is a similar process to  
12  
13 310 that used in the surgical management of miscarriage: the lining of the uterus is scraped after  
14  
15 311 completion of the third stage of labour in order to maximise placental tissue removal. This  
16  
17 312 may be under direct vision following caesarean section, or via the transcervical route  
18  
19 313 following vaginal birth. The latter approach may be ultrasound-guided and necessitates some  
20  
21 314 form of anaesthesia. The theory underlying this intervention is that gestational hypertension  
22  
23 315 and preeclampsia are placenta-mediated, and therefore ensuring complete evacuation of the  
24  
25 316 uterus following childbirth may accelerate recovery.<sup>55 56</sup>

26  
27 317 Seven studies explicitly stated they included both participants who delivered vaginally and  
28  
29 318 those delivered by caesarean: four reported numbers undergoing vaginal delivery (n=248)  
30  
31 319 and caesarean (n=321). One made no comment about the mode of birth.<sup>57</sup> Only one study  
32  
33 320 reported maternal mortality: no difference between groups.<sup>15</sup> Two reported major maternal  
34  
35 321 morbidity, but neither performed any statistical analysis (Table 2b). However, both studies  
36  
37 322 did suggest a reduction in the absolute number of eclamptic seizures in the curettage group  
38  
39 323 compared to no intervention.<sup>15 58</sup> In one, however, there was a relevant difference between the  
40  
41 324 study groups: 28/28 (100%) in the control group were eclamptic at enrolment, compared to  
42  
43 325 9/20 (45%) in the intervention group.<sup>58</sup> Four studies reported safety data, with none reporting  
44  
45 326 any complications related to the intervention (Table 2b).<sup>59-62</sup>

46  
47 327 All eight studies compared curettage with standard care (i.e. no additional intervention), and  
48  
49 328 all suggested that uterine curettage resulted in a significantly lower BP.<sup>15 18 57-62</sup> One of these  
50  
51 329 had two control groups: standard care, and oral nifedipine; when compared to oral nifedipine,  
52  
53 330 no difference was noted with curettage.<sup>60</sup>

54  
55 331 Five studies reported the magnitude of the difference in MAP between curettage and standard  
56  
57 332 care: range 6-13mmHg.<sup>15 18 59 60 62</sup> Only two of these reported BP data beyond 24 hours  
58  
59 333 postpartum: one RCT reported a significantly lower MAP at 48 hours with curettage  
60  
334 (intervention group 104mmHg, control group 113mmHg, difference 9mmHg,  $p=0.0017$ ;  
335  $n=45$ ),<sup>60</sup> but the other RCT demonstrated no significant difference in MAP at 48 hours  
336 (n=420).<sup>15</sup>

1  
2  
3 337 One study demonstrated that a greater proportion of the intervention group attained the target  
4 338 BP of <140/90mmHg at 24 (intervention group 9/20 (45%), control group 3/28 (11%):  
5 339 difference 34%, no *p*-value quoted) and 48 hours postpartum (intervention group 14/20  
6 340 (70%), control group 8/28 (29%): difference 41%, no *p*-value quoted).<sup>58</sup> Two studies did not  
7  
8 341 present the size of the difference between groups.<sup>57 61</sup>

## 12 13 342 **Discussion**

14 343 This review found evidence demonstrating that calcium-channel blockers, vasodilators and  
15 344 beta-blockers lower BP postpartum, but no clear answer to which was most effective and  
16 345 should, therefore, be preferentially prescribed. All but two studies examined the acute control  
17 346 of severe hypertension or short term BP control whilst women remained in hospital  
18 347 postpartum,<sup>25 37</sup> and so provide little guidance about prescription in the weeks after discharge.  
19 348 Moreover these both examined thiazide diuretics, not recommended in the UK for use whilst  
20 349 breastfeeding.<sup>8</sup> Complete safety data were limited across trials, as were data regarding  
21 350 objective clinical outcomes and two further studies examined antihypertensive agents not  
22 351 recommended for use postpartum in the UK (methyldopa and reserpine).<sup>63 64</sup> One trial  
23 352 evaluated captopril at a much higher daily dose than the UK recommended daily starting  
24 353 dose.<sup>64</sup>

25  
26  
27  
28  
29  
30  
31  
32  
33  
34 354 Uterine curettage is not currently recommended, due to safety concerns regarding additional  
35 355 anaesthetic and operative risks, and the availability of alternative treatments to lower BP,  
36 356 particularly in the context of vaginal birth.<sup>65</sup> However, the included studies consistently  
37 357 demonstrated that uterine curettage improved BP control versus standard care,<sup>15 18 57-62</sup> with  
38 358 one reporting an equivalent effect to oral nifedipine.<sup>60</sup> Amongst the limited safety data none  
39 359 reported an excess complication rate (infection or uterine damage) with curettage, but given  
40 360 the low incidence of operative complications, the total population (n=837) was likely  
41 361 insufficient to adequately address potential competing risks. Furthermore, these studies did  
42 362 not demonstrate any impact from curettage on maternal mortality or severe morbidity and  
43 363 concerns exist about some studies' methodology. The evidence reviewed is insufficient to  
44 364 recommend incorporation of this intervention into routine clinical practice.

45  
46  
47  
48  
49  
50  
51  
52  
53 365 Four trials evaluating loop diuretics failed to provide conclusive evidence of benefit. Three  
54 366 produced non-significant results in their main analysis,<sup>16 19 46</sup> and the single conference  
55 367 abstract which did suggest better BP control with oral furosemide, did not publish the  
56 368 magnitude of the difference, rendering it difficult to assess the clinical relevance.<sup>45</sup> In contrast



1  
2  
3 369 to the Cochrane review, we conclude that, at present, there is no evidence to support the  
4 370 routine use of diuretics postpartum.<sup>10</sup>  
5  
6

7 371 We found no adequate evidence to support alternative medications or a particular care model  
8 372 in the management of HDP postpartum. SSRIs substantially reduced BP versus placebo,<sup>48-50</sup>  
9 373 but no published data was identified comparing their efficacy with standard antihypertensive  
10 374 treatment, making it difficult to draw meaningful conclusions about their clinical application.  
11  
12 375 Neither study evaluating postpartum care organisation reported maternal mortality or  
13 376 morbidity, or any measure of BP control, with both selecting postnatal readmissions as their  
14 377 primary outcome. An increased postnatal readmission rate, however, may not necessarily  
15 378 reflect harm: it might instead suggest that a particular model of care can better detect  
16 379 problems in the community and admit appropriately, ultimately resulting in a lower risk to  
17 380 patients.  
18  
19  
20  
21  
22  
23

24 381 In light of the heterogeneous nature of research in this field, when designing this review, we  
25 382 included all interventions targeting hypertension management, but not end-organ  
26 383 complications, including eclampsia. Therefore, trials evaluating magnesium sulphate were  
27 384 outside the scope of this review. We acknowledge the relevance of this therapy in women  
28 385 with severe pre-eclampsia, especially in the immediate postnatal period, and a Cochrane  
29 386 review suggests there is no uncertainty regarding the effectiveness of this therapy.<sup>66</sup>  
30  
31  
32  
33  
34

35 387 A strength of this review is that cohort studies, case-control studies and quasi-randomised  
36 388 studies were eligible in addition to RCTs, and no language or date restrictions were imposed,  
37 389 resulting in a comprehensive review that provides evidence suggesting significant research  
38 390 gaps, consistent with the findings from the Cochrane review (2013).<sup>10</sup> The applicability of the  
39 391 findings and recommendations from this review are restricted by the low quality of included  
40 392 studies: both reviewers judged the vast majority to be at high overall risk of bias. Nearly one-  
41 393 quarter of the included studies were published only as conference abstracts, and therefore not  
42 394 subjected to peer review. Data extraction was restricted to the information provided in the  
43 395 abstracts (no authors provided additional data upon request). These were limiting factors in  
44 396 our analysis, but we nonetheless felt it was important to include these studies for  
45 397 completeness, especially given the paucity of evidence that exists in this field. A further  
46 398 justification for their inclusion is that half of the trials reported in conference abstracts never  
47 399 reach full publication, and positive trials are more likely to be published than negative ones,<sup>67</sup>  
48 400 which has the potential to skew the results of a review if they are omitted.  
49  
50  
51  
52  
53  
54  
55  
56  
57  
58  
59  
60

1  
2  
3 401 A further limitation of this review is that the majority of identified studies did not report  
4 402 substantive clinical outcomes such as maternal mortality, morbidity or harms. Without these,  
5 403 it is difficult to define properly the potential role of proposed interventions in clinical  
6 404 practice. The incidence of adverse maternal and neonatal outcomes, particularly in high  
7 405 resource settings, is low meaning adequately powering studies for real outcomes of interest is  
8 406 financially demanding. Therefore researchers often employ surrogate outcomes. Additionally,  
9 407 the range of outcomes reported in included studies was broad and inconsistent, with BP  
10 408 changes in particular being measured in a variety of different ways, further limiting the  
11 409 comparability of trials. Increasingly, core-outcome sets are being produced, with a view to  
12 410 trials reporting as standard, a minimum set of outcomes that are clinically meaningful and  
13 411 important to patients.<sup>68</sup> We hope in future this would enhance our ability to synthesise results  
14 412 from different studies to produce high-quality evidence. There is consensus about trying to  
15 413 move away from surrogate outcomes, for example time to BP control, as they cannot  
16 414 effectively substitute for clinically important outcomes. An important and clinically  
17 415 meaningful end point should measure how a patient feels, functions, or survives.

18  
19  
20  
21  
22  
23  
24  
25  
26  
27  
28  
29 416 The Cochrane review included only nine randomised trials (author names in bold in  
30 417 Appendix S4). We believe our review adds to this, as an additional 30 studies are included  
31 418 (19 pre-dating the Cochrane search, and 11 subsequent to it), providing a current and  
32 419 complete summary of all available research in the field. The contrast between the scales of  
33 420 the two reviews highlights a lack of high quality evidence, despite a reasonably high number  
34 421 of research studies being conducted to answer the question about how hypertension should be  
35 422 managed postpartum in women with HDP. In future, studies need to be more robust and  
36 423 better designed to address the research questions adequately. Furthermore, in spite of these  
37 424 extensions, the body of evidence identified was substantially smaller than that underpinning  
38 425 antenatal hypertension management: eighteen studies (n=982), not restricted to RCTs,  
39 426 evaluated antihypertensive medications postpartum. Furthermore, the size of all but a few  
40 427 individual studies was small. In comparison, a Cochrane review (2014) evaluating  
41 428 antihypertensive medication for mild to moderate hypertension in pregnancy included 49  
42 429 RCTs (n=4,723).<sup>69</sup> Moreover, the quantity and quality of evidence supporting the  
43 430 management of HDP is vastly less than that available for essential hypertension outside  
44 431 pregnancy, where individual RCTs commonly involve several thousand participants.<sup>70</sup>

45  
46  
47  
48  
49  
50  
51  
52  
53  
54  
55  
56 432 This review demonstrates a lack of good quality evidence for postpartum hypertension  
57 433 management, emphasising the need for further RCTs directly comparing different

1  
2  
3 434 antihypertensive agents, BP thresholds for medication adjustment and different models of  
4 435 care, with outcome measures other than postnatal readmissions. We believe the studies  
5 436 examining uterine curettage justify further research to evaluate clinically meaningful  
6 437 outcomes and procedural risks. It might be pragmatic to confine this to curettage at caesarean  
7 438 section, given concerns regarding surgical intervention after vaginal birth: an additional  
8 439 anaesthetic is not required; infection risk is lowered within a sterile surgical field compared to  
9 440 the transcervical route, and curettage under direct vision limits perforation risk. This might be  
10 441 beneficial in women with severe preeclampsia where BP control during pregnancy has been  
11 442 challenging despite multiple medications.<sup>55</sup>  
12  
13  
14  
15  
16  
17  
18  
19  
20  
21  
22  
23  
24  
25  
26  
27  
28  
29  
30  
31  
32  
33  
34  
35  
36  
37  
38  
39  
40  
41  
42  
43  
44  
45  
46  
47  
48  
49  
50  
51  
52  
53  
54  
55  
56  
57  
58  
59  
60

## **Acknowledgements**

Thanks to Dr Ly-Mee Yu, Dr Helen Cotton and Dr Victoria E Cairns for their assistance with translation.

## **Funding**

The research was funded by the National Institute for Health Research (NIHR) Collaboration for Leadership in Applied Health Research and Care Oxford at Oxford Health NHS Foundation Trust and via a Research Professorship awarded to RMcM (NIHR-RP-02-12-015). The views expressed are those of the author(s) and not necessarily those of the NHS, the NIHR or the Department of Health.

## **Details of ethical approval**

No ethical approval was required for this project.

## **Contribution to authorship**

AC drafted the protocol with JD and drafted and piloted the data extraction sheet. These were reviewed by RMcM, LP, KT, LM and PL. NR and AC wrote the search strategy, and the online searches were conducted by NR. AC and LP reviewed the search results independently and carried out the data extraction. This manuscript was drafted by AC and reviewed by RMcM, JD, LP, NR, KT, LM and PL. AC will be the guarantor.

## **Data sharing statement**

The data utilised in this systematic review originate from the research articles cited in this manuscript. These were collected from the published manuscripts. No additional unpublished data are available.

## References

1. Podymow T, August P. Postpartum course of gestational hypertension and preeclampsia. *Hypertens Pregnancy* 2010;29(3):294-300. doi: 10.3109/10641950902777747
2. Goel A, Maski MR, Bajracharya S, et al. Epidemiology and Mechanisms of De Novo and Persistent Hypertension in the Postpartum Period. *Circulation* 2015;132(18):1726-33. doi: 10.1161/CIRCULATIONAHA.115.015721.
3. Chames MC, Livingston JC, Ivester TS, et al. Late postpartum eclampsia: a preventable disease? *Am J Obstet Gynecol* 2002;186(6):1174-7. doi: 10.1067/mob.2002.123824
4. Kayem G, Kurinczuk JJ, Spark P, et al. Maternal and obstetric factors associated with delayed postpartum eclampsia: a national study population. *Acta Obstet Gyn Scand* 2011;90(9):1017-23. doi: 10.1111/j.1600-0412.2011.01218.x
5. Watson DL, Sibai BM, Shaver DC, et al. Late postpartum eclampsia: an update. *South Med J* 1983;76(12):1487-9.
6. Martin JN, Jr., Thigpen BD, Moore RC, et al. Stroke and severe preeclampsia and eclampsia: a paradigm shift focusing on systolic blood pressure. *Obstet Gynecol* 2005;105(2):246-54. doi: 10.1097/01.AOG.0000151116.84113.56
7. Berks D, Steegers EA, Molas M, et al. Resolution of hypertension and proteinuria after preeclampsia. *Obstet Gynecol* 2009;114(6):1307-14. doi: 10.1097/AOG.0b013e3181c14e3e
8. National Institute for Health and Care Excellence. NICE Clinical Guideline 107: Hypertension in pregnancy: the management of hypertensive disorders during pregnancy, 2011.
9. ACOG Task Force on Hypertension in Pregnancy. Hypertension in Pregnancy: American College of Obstetricians and Gynecologists, 2013.
10. Magee L, von Dadelszen P. Prevention and treatment of postpartum hypertension. *Cochrane Database Syst Rev* 2013(4) doi: 10.1002/14651858.CD004351.pub3
11. Moher D, Shamseer L, Clarke M, et al. Preferred reporting items for systematic review and meta-analysis protocols (PRISMA-P) 2015 statement. *Syst Rev* 2015;4(1) doi: 10.1186/2046-4053-4-1

- 1  
2  
3 12. McManus RJ, Wilson S, Delaney BC, et al. Review of the usefulness of contacting other experts  
4 when conducting a literature search for systematic reviews. *BMJ* 1998;317:1562-3.  
5  
6  
7 13. Higgins JPT, Altman DG, Gøtzsche PC, et al. The Cochrane Collaboration's tool for assessing  
8 risk of bias in randomised trials. *BMJ* 2011;343:d5928. doi: 10.1136/bmj.d5928  
9  
10  
11 14. Wells GA, Shea B, O'Connell D, et al. The Newcastle-Ottawa Scale (NOS) for assessing the  
12 quality of nonrandomised studies in meta-analyses [Available from:  
13 [http://www.ohri.ca/programs/clinical\\_epidemiology/oxford.htm](http://www.ohri.ca/programs/clinical_epidemiology/oxford.htm) accessed 14/07/2017 2017.  
14  
15  
16  
17 15. Ragab A, Goda H, Raghieb M, et al. Does immediate postpartum curettage of the endometrium  
18 accelerate recovery from preeclampsia-eclampsia? A randomized controlled trial. *Arch Gynecol*  
19 *Obstet* 2013;288(5):1035-8. doi: 10.1007/s00404-013-2866-0  
20  
21  
22  
23 16. Ascarelli MH, Johnson V, McCreary H, et al. Postpartum preeclampsia management with  
24 furosemide: a randomized clinical trial. *Obstet Gynecol* 2005;105(1):29-33.  
25  
26  
27 17. Begum MR, Quadir E, Begum A, et al. Management of hypertensive emergencies of pregnancy  
28 by hydralazine bolus injection vs continuous drip-a comparative study. *MedGenMed* 2002;4(4)  
29  
30  
31 18. Mallapur A, Renuka B, Katageri G, et al. Role of postpartum curettage in recovery of severe  
32 preeclampsia and eclampsia patients-a randomised controlled trial. *Int J Gynaecol Obstet*  
33 2015;131(Suppl 5):E191.  
34  
35  
36  
37 19. Veena P, Perivela L, Raghavan SS. Furosemide in postpartum management of severe  
38 preeclampsia: A randomized controlled trial. *Hypertens Pregnancy* 2017;36(1):84-9. doi:  
39 10.1080/10641955.2016.1239735  
40  
41  
42  
43 20. United Nations Department of Economic and Social Affairs. World economic situation and  
44 prospects 2016. New York, United States of America: United Nations, 2016.  
45  
46  
47 21. Vermillion ST, Scardo JA, Newman RB, et al. A randomized, double-blind trial of oral nifedipine  
48 and intravenous labetalol in hypertensive emergencies of pregnancy. *Am J Obstet Gynecol*  
49 1999;181(4):858-61.  
50  
51  
52  
53 22. Mabie WC, Gonzalez AR, Sibai BM, et al. A comparative trial of labetalol and hydralazine in the  
54 acute management of severe hypertension complicating pregnancy. *Obstet Gynecol* 1987;70(3, Part  
55 1):328-33.  
56  
57  
58  
59  
60

- 1  
2  
3 23. Hennessy A, Thornton CE, Makris A, et al. A randomised comparison of hydralazine and mini-  
4 bolus diazoxide for hypertensive emergencies in pregnancy: the PIVOT trial. *Aust N Z J Obstet*  
5 *Gynaecol* 2007;47(4):279-85. doi: 10.1111/j.1479-828X.2007.00738.x  
6  
7  
8  
9 24. Garden A, Davey DA, Dommissie J. Intravenous labetalol and intravenous dihydralazine in severe  
10 hypertension in pregnancy. *Clin Exp Hypertens B* 1982;1(2-3):371-83.  
11  
12 25. Gaisin IR, Iskchakova AS, Shilina LV. Indapamide in the management of post-partum  
13 hypertension: A randomized, case-control study. *Eur Heart J* 2013;34(Suppl 1):271.  
14  
15 26. York R, Brown LP, Samuels P, et al. A randomized trial of early discharge and nurse specialist  
16 transitional follow-up care of high-risk childbearing women. *Nurs Res* 1997;46(5):254-61.  
17  
18 27. Sharma KJ, Greene N, Kilpatrick SJ. Oral labetalol compared to oral extended release nifedipine  
19 for persistent postpartum hypertension: A randomized controlled trial. *Am J Obstet Gynecol*  
20 2016;214(Suppl 1):S27-8.  
21  
22 28. Sharma KJ, Greene N, Kilpatrick SJ. Oral labetalol compared to oral nifedipine for postpartum  
23 hypertension: A randomized controlled trial. *Hypertens Pregnancy* 2017;36(1):44-7. doi:  
24 10.1080/10641955.2016.1231317  
25  
26 29. Noronha Neto C, Maia SSB, Katz L, et al. Clonidine versus Captopril for Severe Postpartum  
27 Hypertension: A Randomized Controlled Trial. *PLoS One* 2017;12(1) doi:  
28 10.1371/journal.pone.0168124  
29  
30 30. Amorim MMR, Noronha Neto C, Maia SB, et al. Clonidine compared with captopril for severe  
31 postpartum hypertension. *Obstet Gynecol* 2015;125(5 Suppl 1):42S.  
32  
33 31. Katz L, Noronha Neto C, Maia S, et al. Clonidine versus captopril for severe postpartum  
34 hypertension: A randomized controlled trial. *Pregnancy Hypertens* 2015;5(Suppl 1):29-30. doi:  
35 10.1016/j.preghy.2014.10.061  
36  
37 32. Barton JR, Hiatt AK, Conover WB. The use of nifedipine during the postpartum period in patients  
38 with severe preeclampsia. *Am J Obstet Gynecol* 1990;162(3):788-92.  
39  
40 33. Bibbo C, Celi A, Thomas AM, et al. Does the addition of a specialized postpartum clinic improve  
41 the care of women with preeclampsia? *Obstet Gynecol* 2014;123(5 Suppl 1):39S.  
42  
43  
44  
45  
46  
47  
48  
49  
50  
51  
52  
53  
54  
55  
56  
57  
58  
59  
60

- 1  
2  
3 34. Sayin NC, Altundag G, Varol FG. Efficacy of alpha-methyldopa and nifedipine in the treatment of  
4 postpartum hypertension. [Turkish] Postpartum hipertansiyon tedavisinde alfametildopa ve  
5 nifedipinin etkinligi. *J Turk Ger Gynecol Assoc* 2005;6(2):118-22.  
6  
7  
8  
9 35. Vigil-De Gracia P, Ruiz E, Lopez JC, et al. Management of severe hypertension in the postpartum  
10 period with intravenous hydralazine or labetalol: a randomized clinical trial. *Hypertens Pregnancy*  
11 2007;26(2):163-71. doi: 10.1080/10641950701204430  
12  
13  
14 36. Palot M, Jakob L, Decaux J. Arterial hypertensions of labor and the post-partum period. [French]  
15 Les Hypertensions Arteriellles Du Travail Et Du Post-Partum. *Rev Fr Gynecol Obstet* 1979;74(3):173-  
16 6.  
17  
18  
19  
20  
21 37. Ilshat Gaisin IR, Iskchakova AS, Shilina LV. Control of cardiovascular risk factors with  
22 ursodeoxycholic acid and indapamide in postpreeclamptic nursing mothers: Results from a  
23 randomized, case-control 1-year study. *Eur J Prev Cardiol* 2014;21(Suppl 1):S120. doi:  
24 10.1177/2047487314534585  
25  
26  
27  
28  
29 38. Griffis KR, Jr., Martin JN, Jr., Palmer SM, et al. Utilization of hydralazine or alpha-methyldopa  
30 for the management of early puerperal hypertension. *Am J Perinatol* 1989;6(4):437-41.  
31  
32  
33 39. Martin JN, Griffis KR, Martin RW, et al. Early puerperal hypertension management: hydralazine  
34 vs methyldopa. *Clin Exp Hypertens B* 1988;8(2):431.  
35  
36  
37 40. Walss Rodriguez RJ, Villarreal Ordaz F. Management of severe pre-eclampsia in the puerperium.  
38 Comparative study of sublingual nifedipine and hydralazine. *Ginecol Obstet Mex* 1991;59:207-10.  
39  
40  
41 41. Shumard K, Yoon J, Huang C, et al. Peripartum anti-hypertensive choice affects time to blood  
42 pressure control in treating hypertensive disorders of pregnancy. *Am J Obstet Gynecol* 2016;214(1  
43 Suppl):S378.  
44  
45  
46  
47 42. Fidler J, Smith V, De Swiet M. A randomized study comparing timolol and methyldopa in  
48 hospital treatment of puerperal hypertension. *Br J Obstet Gynaecol* 1982;89(12):1031-4.  
49  
50  
51 43. Krebs A. Experience with serpasil and luminal in the management of pregnancy-and puerperal  
52 toxemias. *Gynaecologia* 1956;141(4):255-60.  
53  
54  
55 44. Krebs A. Tests of reserpine and phenobarbital in therapy of toxicosis of pregnancy and  
56 puerperium. *Geburtshilfe Frauenheilkd* 1956;16(5):410-22.  
57  
58  
59  
60



- 1  
2  
3 45. Amorim M, Katz L, Cursino T, et al. Postpartum furosemide for accelerating recovery in women  
4 with severe preeclampsia: A randomized clinical trial. *Int J Gynaecol Obstet* 2015;131(Suppl  
5 5):E195.  
6  
7  
8  
9 46. Matthews G, Gornall R, Saunders NJ. A randomised placebo controlled trial of loop diuretics in  
10 moderate/severe pre-eclampsia, following delivery. *J Obstet Gynaecol* 1997;17(1):30-2. doi:  
11 10.1080/01443619750114040  
12  
13 47. Shigemitsu A, Akasaka J, Shigetomi H, et al. Use of carperitide for postpartum diuresis of severe  
14 preeclampsia. *Pregnancy Hypertens* 2015;5(1):145. doi: 10.1016/j.preghy.2014.10.297  
15  
16 48. Weiner CP, Socol ML. Serotonin (5HT) receptor blockade in puerperal pre-eclampsia. *Clin Exp*  
17 *Hypertens B* 1982;1(2-3):195.  
18  
19 49. Weiner CP, Socol ML, Vaisrub N. Control of preeclamptic hypertension by ketanserin, a new  
20 serotonin receptor antagonist. *Am J Obstet Gynecol* 1984;149(5):496-500.  
21  
22 50. Montenegro R, Knuppel RA, Shah D, et al. The effect of serotonergic blockade in postpartum  
23 preeclamptic patients. *Am J Obstet Gynecol* 1985;153(2):130-4.  
24  
25 51. Hladunewich MA, Derby GC, Lafayette RA, et al. Effect of L-arginine therapy on the glomerular  
26 injury of preeclampsia: a randomized controlled trial. *Obstet Gynecol* 2006;107(4):886-95. doi:  
27 10.1097/01.AOG.0000207637.01824.fe  
28  
29 52. Liu Z, Wang X, Yan N. Treatment of albuminuria in gestational hypertension puerpera in the  
30 severe preeclampsia stage by TCM therapy for stasis-removing and diuresis. *Zhongguo Zhong Xi Yi*  
31 *Jie He Za Zhi* 2009;29(3):222-4.  
32  
33 53. Barrilleaux PS, Martin JN, Jr., Klauser CK, et al. Postpartum intravenous dexamethasone for  
34 severely preeclamptic patients without hemolysis, elevated liver enzymes, low platelets (HELLP)  
35 syndrome: a randomized trial. *Obstet Gynecol* 2005;105(4):843-8.  
36  
37 54. Barrilleaux PS, Martin Jr J, Klauser C, et al. Adjunctive intravenous dexamethasone in patients  
38 with severe preeclampsia not complicated by HELLP syndrome. *Am J Obstet Gynecol* 2003;189(6  
39 Suppl):S94.  
40  
41  
42  
43  
44  
45  
46  
47  
48  
49  
50  
51  
52  
53  
54  
55  
56  
57  
58  
59  
60

- 1  
2  
3 55. Caughey AB. Editorial Comment: Does Immediate Postpartum Curettage of the Endometrium  
4 Accelerate Recovery From Preeclampsia–Eclampsia? A Randomized Controlled Trial. *Obstet*  
5 *Gynecol Surv* 2014;69(3):121-2. doi: 10.1097/ogx.0000000000000040  
6  
7  
8  
9 56. Hunter CA, Jr., Howard WF, McCormick CO, Jr. Amelioration of the hypertension of toxemia by  
10 postpartum curettage. *Am J Obstet Gynecol* 1961;81(5):884-9.  
11  
12 57. Gocmen A, Yayla M, Ceylan Erden A, et al. The effect of postpartum curettage in severe  
13 preeclampsia and eclampsia in recovery (Ağır preeklampsı ve eklampsi in iyileşmesinde postpartum  
14 kuretajın etkisi). *Perinatoloji Dergisi* 1996;4(1):24.  
15  
16 58. Salvatore CA, Carduz E, Ciccivizzo E, et al. Postpartum curettage in severe toxemia with and  
17 without premature loosening of the placenta. *Matern Infanc (Sao Paulo)* 1967;26(3):275-86.  
18  
19 59. Magann EF, Martin JN, Jr., Isaacs JD, et al. Immediate postpartum curettage: accelerated recovery  
20 from severe preeclampsia. *Obstet Gynecol* 1993;81(4):502-6.  
21  
22 60. Magann EF, Bass JD, Chauhan SP, et al. Accelerated recovery from severe preeclampsia: uterine  
23 curettage versus nifedipine. *J Soc Gynecol Investig* 1994;1(3):210-4.  
24  
25 61. Gomez LM, De la Vega GA, Ludmir J, et al. Immediate postpartum curettage accelerates clinical  
26 recovery in severe preeclampsia. *Obstet Gynecol* 2005;105(4 Suppl 4):111S.  
27  
28 62. Alkan A, Tugrul S, Oral O, et al. Effects of postpartum uterine curettage on maternal well-being  
29 in severe preeclamptic patients. *Clin Obstet Gynecol* 2006;33(1):55-8.  
30  
31 63. Webster J, Koch HF. Aspects of tolerability of centrally acting antihypertensive drugs. *J*  
32 *Cardiovasc Pharmacol* 1996;27(Suppl 3):S49-54.  
33  
34 64. Joint Formulary Committee. British National Formulary (BNF). 71 ed: BMJ Publishing Group Ltd  
35 and Royal Pharmaceutical Society 2016.  
36  
37 65. Tan LK, de Swiet M. The management of postpartum hypertension. *Br J Obstet Gynaecol*  
38 2002;109(7):733-6.  
39  
40 66. Duley L, Gulmezoglu AM, Henderson-Smart DJ, et al. Magnesium sulphate and other  
41 anticonvulsants for women with pre-eclampsia. *Cochrane Database Syst Rev* 2010(11) doi:  
42 10.1002/14651858.CD000025.pub2  
43  
44  
45  
46  
47  
48  
49  
50  
51  
52  
53  
54  
55  
56  
57  
58  
59  
60

- 1  
2  
3 67. Scherer RW, Langenberg P, von Elm E. Full publication of results initially presented in abstracts.  
4  
5 *Cochrane Database Syst Rev* 2007(2) doi: 10.1002/14651858.MR000005.pub3  
6  
7 68. Khan K. The CROWN Initiative: journal editors invite researchers to develop core outcomes in  
8  
9 women's health. *Br J Obstet Gynaecol* 2014;121(10):1181-2. doi: 10.1111/1471-0528.12929  
10  
11 69. Abalos E, Duley L, Steyn DW. Antihypertensive drug therapy for mild to moderate hypertension  
12  
13 during pregnancy. *Cochrane Database Syst Rev* 2014(2) doi: 10.1002/14651858.CD002252.pub3  
14  
15 70. National Institute for Health and Care Excellence. NICE Clinical Guideline 127: Hypertension in  
16  
17 adults: diagnosis and management, 2011.  
18  
19  
20  
21  
22  
23  
24  
25  
26  
27  
28  
29  
30  
31  
32  
33  
34  
35  
36  
37  
38  
39  
40  
41  
42  
43  
44  
45  
46  
47  
48  
49  
50  
51  
52  
53  
54  
55  
56  
57  
58  
59  
60

1  
2  
3  
4  
5  
6  
7  
8  
9  
10  
11  
12  
13  
14  
15  
16  
17  
18  
19  
20  
21  
22  
23  
24  
25  
26  
27  
28  
29  
30  
31  
32  
33  
34  
35  
36  
37  
38  
39  
40  
41  
42  
43  
44  
45  
46  
47  
48  
49  
50  
51  
52  
53  
54  
55  
56  
57  
58  
59  
60

**Tables and figures**

**Figure 1: PRISMA Flowchart**

See separate document.

For peer review only

**Table 1: Outcome measures**

|                             | <b>Outcome measures</b>                                                                                                                                                             | <b>Timing</b>                                                                                 |
|-----------------------------|-------------------------------------------------------------------------------------------------------------------------------------------------------------------------------------|-----------------------------------------------------------------------------------------------|
| <b>Primary outcome(s)</b>   | Maternal mortality                                                                                                                                                                  | Direct maternal deaths up to day 42 postpartum; later maternal deaths up to 1 year postpartum |
|                             | Maternal morbidity (ischaemic stroke, intracranial haemorrhage, eclamptic seizure; development of preeclampsia with severe features; postnatal complication requiring intervention) |                                                                                               |
|                             | Systolic blood pressure control                                                                                                                                                     |                                                                                               |
|                             | Diastolic blood pressure control                                                                                                                                                    |                                                                                               |
|                             | Mean arterial pressure control                                                                                                                                                      |                                                                                               |
|                             | Safety data (adverse events or maternal side effects)                                                                                                                               |                                                                                               |
| <b>Secondary outcome(s)</b> | Critical care admission                                                                                                                                                             |                                                                                               |
|                             | Length of hospital stay following delivery                                                                                                                                          |                                                                                               |
|                             | Postnatal readmission to secondary care                                                                                                                                             |                                                                                               |
|                             | Antihypertensive medication requirement                                                                                                                                             |                                                                                               |
|                             | Urine output                                                                                                                                                                        |                                                                                               |
|                             | Laboratory values<br>Other as defined by study                                                                                                                                      |                                                                                               |

Table 2a: Primary outcome and safety data reporting in included studies (Antihypertensive medications, 18 studies)

| Study ID                                    | Intervention                                           | Control                                   | Primary outcome assessment |                    |             | Safety data reporting | Results (for reported outcomes) |                                                                                                                                                                                                                                                                                                |
|---------------------------------------------|--------------------------------------------------------|-------------------------------------------|----------------------------|--------------------|-------------|-----------------------|---------------------------------|------------------------------------------------------------------------------------------------------------------------------------------------------------------------------------------------------------------------------------------------------------------------------------------------|
|                                             |                                                        |                                           | Maternal mortality         | Maternal morbidity | SBP control |                       |                                 | DBP control                                                                                                                                                                                                                                                                                    |
| <b>CALCIUM CHANNEL BLOCKERS (3 studies)</b> |                                                        |                                           |                            |                    |             |                       |                                 |                                                                                                                                                                                                                                                                                                |
| Barton 1990 <sup>32</sup>                   | Nifedipine (oral)                                      | Placebo                                   |                            |                    | ●           | ●                     | ●                               | SBP control: no significant difference.<br>DBP control: no significant difference.<br>MAP control: improved in intervention group (difference 6.3mmHg, p<0.05).                                                                                                                                |
| Vermillion 1999 <sup>21</sup>               | Nifedipine (oral)                                      | Labetalol (IV bolus)                      |                            |                    | ●           | ●                     | ●                               | SBP control: improved in intervention group (difference in time to target BP 18.5 minutes, p=0.002).<br>DBP control: improved in intervention group (difference in time to target BP 18.5 minutes, p=0.002).<br>Safety: no significant difference. 1/25 intervention group became hypotensive. |
| Sayin 2005 <sup>34</sup>                    | Nifedipine (oral)                                      | Methyldopa (oral)                         | ●                          |                    | ●           | ●                     |                                 | Maternal mortality: no significant difference.<br>SBP control: no significant difference.<br>DBP control: no significant difference.                                                                                                                                                           |
| <b>VASODILATORS (6 studies)</b>             |                                                        |                                           |                            |                    |             |                       |                                 |                                                                                                                                                                                                                                                                                                |
| Palot 1979 <sup>36</sup>                    | Hydralazine (IV infusion) plus furosemide (IV bolus)   | Clonidine (IV) plus furosemide (IV bolus) |                            | ●                  |             |                       |                                 | Maternal morbidity: no statistical analysis.                                                                                                                                                                                                                                                   |
| Griffis 1989 <sup>38, 39</sup>              | Hydralazine (IM)                                       | Methyldopa (IV bolus)                     |                            |                    |             | ●                     | ●                               | MAP control: no significant difference.<br>Safety: no significant difference. No side effects reported in either group.                                                                                                                                                                        |
| Walss Rodriguez 1991 <sup>40</sup>          | Hydralazine (oral) plus nifedipine (oral, as required) | Nifedipine (oral, as required)            |                            |                    | ●           | ●                     |                                 | SBP control: no significant difference.<br>DBP control: no significant difference.                                                                                                                                                                                                             |
| Begum 2002 <sup>17</sup>                    | Hydralazine (IV bolus)                                 | Hydralazine (IV infusion)                 |                            |                    |             | ●                     | ●                               | DBP control: improved in intervention group (difference in time to target DBP 121.1 minutes, p<0.001).<br>Safety: no significant difference. No side effects reported in either group.                                                                                                         |
| Vigil de Gracia 2007 <sup>35</sup>          | Hydralazine (IV bolus)                                 | Labetalol (IV bolus)                      | ●                          | ●                  | ●           | ●                     | ●                               | Maternal mortality: no significant difference.<br>Maternal morbidity: no significant difference.<br>SBP control: no significant difference.<br>DBP control: no significant difference.<br>Safety: no significant difference. Small numbers of side effects reported in both groups.            |
| Hennessy 2007 <sup>23</sup>                 | Diazoxide (IV bolus)                                   | Hydralazine (IV bolus)                    |                            |                    | ●           | ●                     |                                 | SBP control: improved in intervention group (difference in percentage achieving target BP 23%, p<0.01).<br>DBP control: improved in intervention group (difference in percentage achieving target BP 23%, p<0.01).                                                                             |
| <b>BETA BLOCKERS (5 studies)</b>            |                                                        |                                           |                            |                    |             |                       |                                 |                                                                                                                                                                                                                                                                                                |
| Garden 1982 <sup>24</sup>                   | Labetalol (IV infusion)                                | Dihydralazine (IV infusion)               |                            |                    |             | ●                     | ●                               | DBP control: no statistical analysis.<br>Safety: no statistical analysis. 1/6 intervention group developed bronchospasm. 4/6 control group developed tachycardia and 1/6 developed oliguria. 4/6 control group – drug stopped due to a precipitous fall of DBP to 40-50mmHg.                   |

| Study ID                                         | Intervention                                       | Control                | Primary outcome assessment |                    |             |             |             | Safety data reporting                                                                                                                                                                                                                                                                                                                                                                                             | Results (for reported outcomes) |
|--------------------------------------------------|----------------------------------------------------|------------------------|----------------------------|--------------------|-------------|-------------|-------------|-------------------------------------------------------------------------------------------------------------------------------------------------------------------------------------------------------------------------------------------------------------------------------------------------------------------------------------------------------------------------------------------------------------------|---------------------------------|
|                                                  |                                                    |                        | Maternal mortality         | Maternal morbidity | SBP control | DBP control | MAP control |                                                                                                                                                                                                                                                                                                                                                                                                                   |                                 |
| Fidler 1982 <sup>42</sup>                        | Timolol (oral)                                     | Methyldopa (oral)      |                            |                    | ●           | ●           | ●           | SBP control: improved in intervention group (difference 5.1mmHg, p<0.05).<br>DBP control: no significant difference.<br>Safety: no statistical analysis. 1/40 intervention group became disorientated. 1/40 control group became hypotensive and 1/40 became drowsy.                                                                                                                                              |                                 |
| Mabie 1987 <sup>22</sup>                         | Labetalol (IV bolus)                               | Hydralazine (IV bolus) |                            |                    |             |             | ●           | MAP control: improved in control group (difference 7.8mmHg (p 0.02)).<br>Safety: no statistical analysis. 1/40 intervention group developed scalp tingling. 2/20 control group developed headaches.                                                                                                                                                                                                               |                                 |
| Shumard 2016 <sup>41</sup>                       | Labetalol (oral)                                   | Nifedipine (oral)      |                            |                    | ●           | ●           |             | SBP control: improved in control group (difference in time to achieve target BP 1 day, p=0.0031).<br>DBP control: improved in control group (difference in time to achieve target BP 1 day, p=0.0031).                                                                                                                                                                                                            |                                 |
| Sharma 2017 <sup>27 28</sup>                     | Labetalol (oral)                                   | Nifedipine (oral)      |                            |                    | ●           | ●           | ●           | SBP: no significant difference.<br>DBP: no significant difference.<br>Safety: No major side effects reported in either group. Minor side effects more commonly reported in control group (20% intervention, 48% control, p=0.04).                                                                                                                                                                                 |                                 |
| <b>THIAZIDES (2 studies)</b>                     |                                                    |                        |                            |                    |             |             |             |                                                                                                                                                                                                                                                                                                                                                                                                                   |                                 |
| Gaisin 2013 <sup>25</sup>                        | Indapamide (oral)                                  | Methyldopa (oral)      |                            |                    | ●           | ●           | ●           | SBP control: no significant difference.<br>DBP control: no significant difference.<br>Safety: no statistical analysis, no details reported.                                                                                                                                                                                                                                                                       |                                 |
| Gaisin 2014 <sup>37</sup>                        | Indapamide (oral) plus ursodeoxycholic acid (oral) | Methyldopa (oral)      |                            |                    | ●           | ●           | ●           | SBP control: no significant difference.<br>DBP control: no significant difference.<br>Safety: no significant difference. No adverse events reported in either group.                                                                                                                                                                                                                                              |                                 |
| <b>INDOLE ALKALOIDS (1 study)</b>                |                                                    |                        |                            |                    |             |             |             |                                                                                                                                                                                                                                                                                                                                                                                                                   |                                 |
| Krebs 1956 <sup>43 44</sup>                      | Reserpine (oral or IM)                             | Phenobarbital          |                            |                    | ●           | ●           | ●           | SBP control: no statistical analysis.<br>DBP control: no statistical analysis.<br>Safety: no statistical analysis. No adverse events reported in intervention group, no comment on control.                                                                                                                                                                                                                       |                                 |
| <b>CENTRALLY-ACTING ALPHA-AGONISTS (1 study)</b> |                                                    |                        |                            |                    |             |             |             |                                                                                                                                                                                                                                                                                                                                                                                                                   |                                 |
| Noronha Neto 2016 <sup>29-31</sup>               | Clonidine (oral)                                   | Captopril (oral)       | ●                          | ●                  | ●           | ●           | ●           | Maternal mortality: no significant difference.<br>Maternal morbidity: no significant difference.<br>SBP control: improved in intervention group (difference in number of episodes of high BP (1.4, p<0.08)).<br>DBP: improved in intervention group (difference in number of episodes of high BP (1.4, p<0.08)).<br>Safety: no significant difference. Adverse reactions 18.6% intervention, 28.8% control, p=NS. |                                 |

**Table 2b: Primary outcome and safety data reporting in included studies (Loop diuretics, other drugs, uterine curettage and organisation of care, 21 studies)**

| Study ID                          | Intervention                          | Control           | Primary outcome assessment |                    |             |             |             | Safety data reporting                                                                                                                                                                                                                                                        | Results (for reported outcomes) |
|-----------------------------------|---------------------------------------|-------------------|----------------------------|--------------------|-------------|-------------|-------------|------------------------------------------------------------------------------------------------------------------------------------------------------------------------------------------------------------------------------------------------------------------------------|---------------------------------|
|                                   |                                       |                   | Maternal mortality         | Maternal morbidity | SBP control | DBP control | MAP control |                                                                                                                                                                                                                                                                              |                                 |
| <b>LOOP DIURETICS (4 studies)</b> |                                       |                   |                            |                    |             |             |             |                                                                                                                                                                                                                                                                              |                                 |
| Matthews 1997 <sup>46</sup>       | Furosemide (oral)                     | Placebo           |                            |                    |             |             | ●           | MAP control: no significant difference.                                                                                                                                                                                                                                      |                                 |
| Ascarelli 2005 <sup>16</sup>      | Furosemide (oral)                     | No intervention   |                            | ●                  | ●           | ●           |             | Maternal morbidity: no significant difference.<br>SBP control: no significant difference.<br>DBP control: no significant difference.                                                                                                                                         |                                 |
| Amorim 2015 <sup>45</sup>         | Furosemide (oral)                     | Placebo           |                            |                    | ●           | ●           | ●           | SBP control: improved in intervention group (difference not stated, p<0.001).<br>DBP control: improved in intervention group (difference not stated, p<0.001).<br>MAP control: improved in intervention group (difference not stated, p<0.001).                              |                                 |
| Veena 2017 <sup>19</sup>          | Furosemide (oral) + nifedipine (oral) | Nifedipine (oral) |                            | ●                  | ●           | ●           | ●           | Maternal morbidity: no significant difference.<br>SBP control: no significant difference.<br>DBP control: no significant difference.<br>MAP control: no significant difference.                                                                                              |                                 |
| <b>OTHER DRUGS (7 studies)</b>    |                                       |                   |                            |                    |             |             |             |                                                                                                                                                                                                                                                                              |                                 |
| <b>Selective 5-HT antagonists</b> |                                       |                   |                            |                    |             |             |             |                                                                                                                                                                                                                                                                              |                                 |
| Weiner 1982 <sup>48</sup>         | R41468 (intravenous infusion)         | Placebo           |                            |                    |             |             | ●           | MAP control: improved in intervention group (difference 25.6mmHg, p<0.001).<br>SBP control: improved in intervention group (difference in SBP decline 34mmHg, p<0.001).<br>DBP control: improved in intervention group (difference in DBP decline 27mmHg, p<0.001).          |                                 |
| Weiner 1984 <sup>49</sup>         | Ketanserin (IV infusion)              | Placebo           |                            | ●                  | ●           | ●           | ●           | MAP control: improved in intervention group (difference not stated, p<0.001)<br>Safety: No statistical analysis. 3/20 intervention group experienced blurred vision: 1 of these was hypotensive (responded to hydration). 1/20 intervention group experienced mild euphoria. |                                 |
| Montenegro 1985 <sup>50</sup>     | Ketanserin (IV bolus +/- infusion)    | Placebo           |                            | ●                  | ●           | ●           | ●           | SBP control: improved in intervention group (absolute difference not stated, p<0.001).<br>DBP control: improved in intervention group (absolute difference not stated, p<0.001).<br>MAP control: improved in intervention group (absolute difference not stated, p<0.001).   |                                 |
| <b>Alternative therapies</b>      |                                       |                   |                            |                    |             |             |             |                                                                                                                                                                                                                                                                              |                                 |
| Hladunewich 2006 <sup>51</sup>    | L-arginine (oral or IV bolus)         | Placebo           |                            |                    | ●           | ●           | ●           | SBP control: no significant difference.<br>DBP control: no significant difference.<br>MAP control: no significant difference.<br>Safety: no significant difference. No adverse events reported in either group.                                                              |                                 |
| Liu 2009 <sup>52</sup>            | Shengkangbao (oral or IV bolus)       | No intervention   |                            |                    | ●           | ●           |             | SBP control: no significant difference.<br>DBP control: no significant difference.                                                                                                                                                                                           |                                 |



| Study ID                                | Intervention                      | Control                              | Primary outcome assessment |                    |             |             |             | Safety data reporting                                                                                                                                                                                                                                                                                                               | Results (for reported outcomes) |
|-----------------------------------------|-----------------------------------|--------------------------------------|----------------------------|--------------------|-------------|-------------|-------------|-------------------------------------------------------------------------------------------------------------------------------------------------------------------------------------------------------------------------------------------------------------------------------------------------------------------------------------|---------------------------------|
|                                         |                                   |                                      | Maternal mortality         | Maternal morbidity | SBP control | DBP control | MAP control |                                                                                                                                                                                                                                                                                                                                     |                                 |
| <b>Steroids</b>                         |                                   |                                      |                            |                    |             |             |             |                                                                                                                                                                                                                                                                                                                                     |                                 |
| Barrilleaux 2005 <sup>53 54</sup>       | Dexamethasone (IV bolus)          | Placebo                              |                            |                    |             |             | ●           | MAP control: no significant difference.                                                                                                                                                                                                                                                                                             |                                 |
| <b>Atrial natriuretic peptide</b>       |                                   |                                      |                            |                    |             |             |             |                                                                                                                                                                                                                                                                                                                                     |                                 |
| Shigemitsu 2015 <sup>47</sup>           | Carperitide (route not specified) | No intervention                      | ●                          |                    |             |             | ●           | Maternal mortality: no significant difference.<br>MAP control: no significant difference.<br>Safety: no significant difference. No adverse events reported in either group.                                                                                                                                                         |                                 |
| <b>UTERINE CURETTAGE (8 studies)</b>    |                                   |                                      |                            |                    |             |             |             |                                                                                                                                                                                                                                                                                                                                     |                                 |
| Salvatore 1967 <sup>58</sup>            | Uterine curettage                 | No intervention                      |                            | ●                  | ●           | ●           |             | Maternal morbidity: no statistical analysis.<br>SBP control: no statistical analysis.<br>DBP control: no statistical analysis.                                                                                                                                                                                                      |                                 |
| Magann 1993 <sup>59</sup>               | Uterine curettage                 | No intervention                      |                            |                    |             |             | ●           | MAP control: improved in intervention group (difference at different time points to 24h postpartum 6-10mmHg, p<0.05).<br>Safety: no significant difference. No complications reported from intervention (follow-up to 7 weeks postpartum).                                                                                          |                                 |
| Magann 1994 <sup>60</sup>               | Uterine curettage                 | Nifedipine (oral) or no intervention |                            |                    |             |             | ●           | MAP control: no significant difference between intervention and oral nifedipine; improved in intervention group compared to no intervention (difference at 8-48h postpartum 9-13mmHg, p=0.0017).<br>Safety: no significant difference. No complications/side effects reported from interventions (follow-up to 7 weeks postpartum). |                                 |
| Gocmen 1996 <sup>57</sup>               | Uterine curettage                 | No intervention                      |                            |                    |             |             | ●           | MAP control: improved in intervention group (difference not stated, p=0.01).                                                                                                                                                                                                                                                        |                                 |
| Gomez 2005 <sup>61</sup>                | Uterine curettage                 | No intervention                      |                            |                    |             |             | ●           | MAP control: improved in intervention group (difference not stated, p<0.001).<br>Safety: no significant difference. No complications reported from intervention.                                                                                                                                                                    |                                 |
| Alkan 2006 <sup>62</sup>                | Uterine curettage                 | No intervention                      |                            |                    |             |             | ●           | MAP control: improved in intervention group (difference 6.8mmHg, p<0.05).<br>Safety: No significant difference. No complications reported from intervention.                                                                                                                                                                        |                                 |
| Ragab 2013 <sup>15</sup>                | Uterine curettage                 | No intervention                      | ●                          | ●                  |             |             | ●           | Maternal mortality: no significant difference.<br>Maternal morbidity: no statistical analysis.<br>MAP control: improved in intervention group (difference at 6h postpartum 12.3mmHg, P=0.02, difference at 24h postpartum 9.2mmHg, p=0.01)                                                                                          |                                 |
| Mallapur 2015 <sup>18</sup>             | Uterine curettage                 | No intervention                      |                            |                    |             |             | ●           | MAP control: improved in intervention group (difference at 4h postpartum 7.6mmHg, p<0.001).                                                                                                                                                                                                                                         |                                 |
| <b>ORGANISATION OF CARE (2 studies)</b> |                                   |                                      |                            |                    |             |             |             |                                                                                                                                                                                                                                                                                                                                     |                                 |
| York 1997 <sup>26</sup>                 | Nurse specialist follow-up        | No intervention                      |                            |                    |             |             |             | N/A                                                                                                                                                                                                                                                                                                                                 |                                 |
| Bibbo 2014 <sup>33</sup>                | Specialist postpartum clinic      | No intervention                      |                            |                    |             |             |             | N/A                                                                                                                                                                                                                                                                                                                                 |                                 |

1  
2  
3  
4  
5  
6  
7  
8  
9  
10  
11  
12  
13  
14  
15  
16  
17  
18  
19  
20  
21  
22  
23  
24  
25  
26  
27  
28  
29  
30  
31  
32  
33  
34  
35  
36  
37  
38  
39  
40  
41  
42  
43  
44  
45  
46  
47  
48  
49

**Legend for Tables 2a&b**

● = improved in intervention group; ● = no significant difference; ● = improved in control group; ● = unclear

For primary outcome assessment where there was a significant difference between groups, the magnitude of the difference is reported; where any adverse events or side effects were reported this is presented

For peer review only

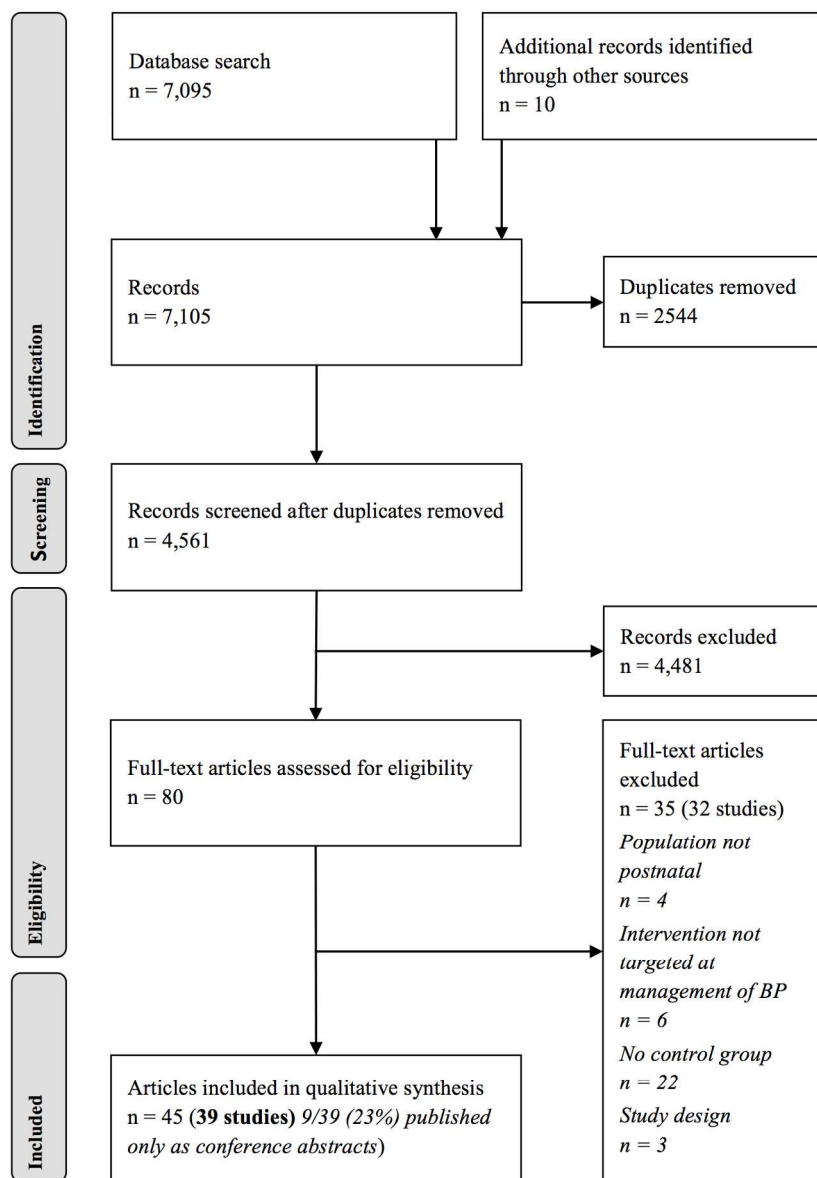

Figure 1: PRISMA Flowchart

137x193mm (300 x 300 DPI)

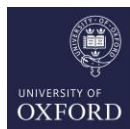

NUFFIELD DEPARTMENT OF  
**PRIMARY CARE**  
HEALTH SCIENCES

1  
2  
3  
4  
5  
6  
7  
8  
9  
10  
11  
12  
13  
14  
15  
16  
17  
18  
19  
20  
21  
22  
23  
24  
25  
26  
27  
28  
29  
30  
31  
32  
33  
34  
35  
36  
37  
38  
39  
40  
41  
42  
43  
44  
45  
46  
47  
48  
49  
50  
51  
52  
53  
54  
55  
56  
57  
58  
59  
60

**Appendix S1: Management of hypertensive disorders of pregnancy in the postpartum period: A systematic review protocol**

**Registration:** PROSPERO CRD42015015527

[http://www.crd.york.ac.uk/PROSPERO/display\\_record.asp?ID=CRD42015015527#.VL4ZI9KsWCK](http://www.crd.york.ac.uk/PROSPERO/display_record.asp?ID=CRD42015015527#.VL4ZI9KsWCK)

**Authors:** Alexandra E Cairns, Louise Pealing, Nia Roberts, Richard J McManus

**Corresponding author:** Alexandra E Cairns, Nuffield Department of Primary Care Health Sciences, University of Oxford, New Radcliffe House, Radcliffe Observatory Quarter, Woodstock Road, Oxford, OX2 6GG

[alexandra.cairns@phc.ox.ac.uk](mailto:alexandra.cairns@phc.ox.ac.uk)

**Amendments:** Protocol first published 22/12/2014 (version 1.0). Protocol amended (version 2.0 25/03/2015) to include all reporting items from the PRISMA-P 2015 checklist, and PROSPERO registration number.

**Review funder:** NIHR Collaborations for Leadership in Applied Health Research and Care (funding A Cairns' fellowship)

**Review sponsor:** University of Oxford

**Abstract**

**Rationale:** Hypertensive disorders of pregnancy (gestational hypertension and pre-eclampsia) are a leading cause of direct maternal death in the UK, and affect approximately 5-10% of pregnancies. Hypertensive disorders of pregnancy persist during the postpartum period, and complications can occur during this time.

**Research question:** How should hypertensive disorders of pregnancy be managed in the postnatal period to minimise harm to patients and optimise quality of life?

**Objectives:**

1. Organisation of care: how should blood pressure be monitored in women with hypertensive disorders of pregnancy in the postnatal period?
2. What blood pressure thresholds should be used for anti-hypertensive treatment initiation, adjustment and cessation in the postnatal period?
3. Which anti-hypertensive medication(s) should be used in the postnatal period?
4. What are the benefits and harms of other therapeutic interventions for women with hypertensive disorders of pregnancy in the postnatal period?

**Search strategy:** Medline and nine other electronic databases will be searched for articles published from inception until October 2014 using a search strategy designed to capture all the relevant literature concerning the management of hypertensive disorders of pregnancy in the postnatal period.

**Study eligibility criteria:**

*Population:* postnatal women with gestational hypertension or pre-eclampsia as defined by study

*Intervention:* therapeutic intervention for hypertensive disorders of pregnancy

*Comparisons:* another intervention, placebo or no intervention

*Study design:* RCT, prospective or retrospective cohort study or case-control study

*Publication date:* no restrictions

*Language:* no restrictions

**Data management and extraction:** Two reviewers will first review the titles of articles yielded by the search, and then the abstracts of articles of potential relevance. The full papers of potentially eligible papers will be assessed, and data extracted independently by the two reviewers using a data extraction sheet. Differences in study selection and data extraction will be resolved by discussion.

**Assessment of methodological quality:** This will be done using the Cochrane Collaboration's tool for assessing risk of bias in randomised trials, and for the assessment of bias in cohort and case-control studies we will use the Newcastle-Ottawa quality assessment scales.

**Systematic review registration:** This systematic review is registered with PROSPERO (International prospective register of systematic reviews).

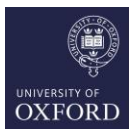

## Rationale

### *Definitions*

The National Institute for Health and Clinical Excellence (NICE) defines gestational hypertension as new-onset raised blood pressure ( $\geq 140/90$ mmHg) beyond 20 weeks gestation. NICE defines pre-eclampsia as new-onset raised blood pressure ( $\geq 140/90$ mmHg) together with new-onset significant proteinuria ( $\geq 300$ mg/24hr), beyond 20 weeks gestation (1).

The International Society for the Study of Hypertension in Pregnancy (ISSHP) defines pre-eclampsia as new-onset raised blood pressure (as defined by NICE) in association with one of new-onset significant proteinuria (as defined by NICE), maternal organ dysfunction or uteroplacental insufficiency (2).

### *Epidemiology*

Hypertensive disorders of pregnancy remain the second commonest direct cause of maternal death in the USA (3). Until recently this has also been the case in the UK (CMACE 2006-8)(4), but the most recent Confidential Enquiry into maternal deaths showed that for the triennium 2009-11, pre-eclampsia and eclampsia was the fourth commonest cause of direct death (behind thrombosis, genital tract sepsis and haemorrhage), with a rate of 0.42 deaths per 100,000 maternities (5).

A recent population-based retrospective study in the United States found the rate of pre-eclampsia to be 3.4%. This study showed a slight, but significant increase, in the rates of both mild, and to a greater extent, severe pre-eclampsia over the period studied (1980-2010) (6).

Reviews of the literature, and national guidelines, quote rates of gestational hypertension between 6% (7) and 15% (8). A retrospective study using data from the National Hospital Discharge Survey in the United States (1987-2004) demonstrated an incidence of 30.6 cases of gestational hypertension per 1000 deliveries in 2003-2004 (3.1%) (9). In a well-designed large randomised controlled trial assessing preventative strategies for hypertensive disorders of pregnancy in low risk, nulliparous women the incidence of gestational hypertension across both groups was 6% (10).

### *Physiology of blood pressure in pregnancy and postpartum*

As a result of a significant decrease in systemic vascular resistance (as early as 5 weeks gestation) (11) there is a decrease in arterial pressures from early in the first trimester. Arterial pressures reach a nadir in the second trimester, and then begin to rise in the third trimester, before reaching near-preconception levels in the postnatal period (12).

**Figure 1: Serial blood pressures before, during and after pregnancy (reproduced from the data of Mahendru et al. 2014) (12)**

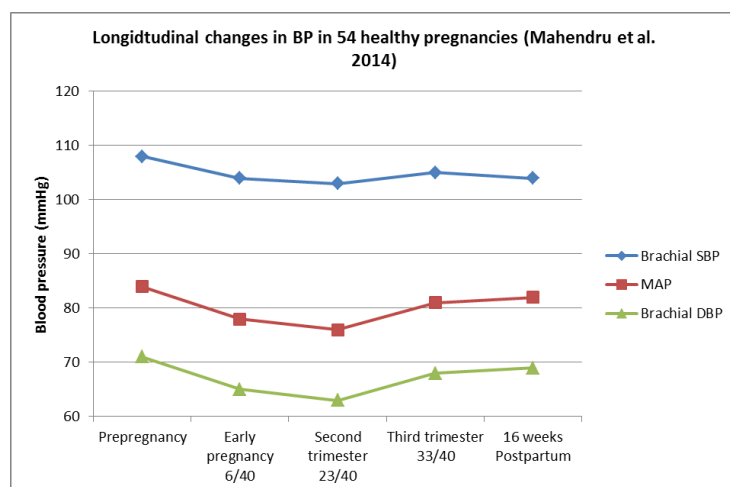

In gestational hypertension and pre-eclampsia the normal pregnancy-induced vasodilatation is reversed. In untreated women with pre-eclampsia significant increases in systemic vascular resistance are seen and result in elevation of blood pressure (13).

### ***Hypertensive disorders of pregnancy in the postpartum period***

There has been considerable focus on blood pressure control during pregnancy, especially with respect to pregnancy outcome. However, it is recognised that hypertensive disorders of pregnancy do persist during the postpartum period, and that complications can occur during this time. A small retrospective observational study published in 1987 looked at 67 women with moderate-severe pre-eclampsia: there was often an initial decrease in blood pressure after delivery, but this was followed by a rise to hypertensive levels in many women. In 50% of cases the blood pressure was 150/100mmHg or higher on day 5 after birth. The authors recommended continuing blood pressure monitoring and treatment in the postpartum period for women with a diagnosis of pre-eclampsia (14).

Most women with hypertensive disorders of pregnancy will be treatment-free by 3 months postpartum. In women whose blood pressure normalised after delivery the mean time to normalisation in a retrospective cohort study of 62 women was 5.4 weeks (15). This rapidly changing blood pressure, with shifting medication requirement, poses an additional challenge in terms of how best to manage this down-titration.

Approximately one third of eclamptic seizures occur postpartum, and studies suggest that over half of these seizures occur more than 48 hours after birth. Chames et al. (2002) highlight the importance of education of women and clinicians regarding prodromal symptoms of eclampsia in the postnatal



1  
2  
3  
4  
5  
6  
7  
8  
9  
10  
11  
12  
13  
14  
15  
16  
17  
18  
19  
20  
21  
22  
23  
24  
25  
26  
27  
28  
29  
30  
31  
32  
33  
34  
35  
36  
37  
38  
39  
40  
41  
42  
43  
44  
45  
46  
47  
48  
49  
50  
51  
52  
53  
54  
55  
56  
57  
58  
59  
60

period (16). A case series published in 2005 of patients who sustained a stroke in association with severe pre-eclampsia or eclampsia, showed that more than half (57%) of these strokes occurred in the postpartum period (17).

### **Current guidelines**

NICE guidelines highlight that very few clinical studies have addressed the management of blood pressure postpartum, and in practice clinical care is typically to continue antepartum antihypertensive medication and monitor blood pressure in the community with a focus on prevention of over-treatment.

NICE recommend frequency of monitoring in the postnatal period for both pre-eclampsia and gestational hypertension. The guidelines also stipulate thresholds for considering increasing or starting anti-hypertensive medication during this period (150/100 mmHg), and for reduction or stopping anti-hypertensive medication (consider at < 140/90 mmHg, and reduce at < 130/80 mmHg) (1).

### **Research question**

How should hypertensive disorders of pregnancy be managed in the postnatal period to minimise harm to patients and optimise quality of life?

### **Objectives**

The aim is to establish what evidence exists to guide the optimal approach to management of gestational hypertension and pre-eclampsia in the postnatal period. We want to address the specific sub-questions:

1. Organisation of care: how should blood pressure be monitored in women with hypertensive disorders of pregnancy in the postnatal period?
2. What blood pressure thresholds should be used for anti-hypertensive treatment initiation, adjustment and cessation in the postnatal period?
3. Which anti-hypertensive medication(s) should be used in the postnatal period?
4. What are the benefits and harms of other therapeutic interventions for women with hypertensive disorders of pregnancy in the postnatal period?

### **Information sources and search strategy**

The systematic review of 'management of hypertensive disorders of pregnancy in the postpartum period' will be conducted in line with the PRISMA statement (18). Completion of a systematic review



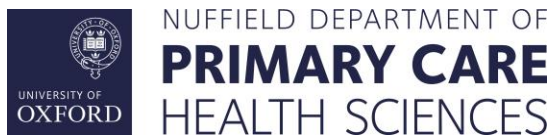

is an iterative process, and it may be that modifications to the original review protocol are required during its conduct.

A search strategy designed to capture all the relevant literature concerning the management of hypertensive disorders of pregnancy in the postnatal period will be developed by an experienced trial search co-ordinator. Potentially relevant studies will be identified following screening of title and abstract of studies captured by the search and full text assessed for suitability.

Resources to be searched from inception to October 2014:

- Medline (Appendix 3) and 9 other electronic databases
- Trial registers (ClinicalTrials.gov; Current Controlled Trials; WHO; PROSPERO)
- Meta Search Engines
- Hand searches of reference lists
- Citation searching on Scopus and Web of Science
- Related articles search on PubMed
- Contact with authors and professional bodies / organisations: Experts in this field will be contacted for their recommendations of potentially relevant citations (19)

## Study eligibility criteria

### **INCLUSION CRITERIA**

**Population:** postnatal women with hypertensive disorders of pregnancy (gestational hypertension or pre-eclampsia).

**Intervention:** therapeutic intervention for management of hypertensive disorders of pregnancy

**Comparisons:** other intervention, placebo or no intervention

**Study design:** randomised controlled trial, cohort study (prospective and retrospective) or case-control study; human studies only

**Publication Date:** no restrictions

**Language:** no restrictions

### **EXCLUSION CRITERIA**

Exclude report / study if **any** exclusion criteria fulfilled:

**Population:** antenatal or intrapartum women with hypertensive disorders of pregnancy; end-organ complications of pre-eclampsia (eclampsia, renal failure, HELLP syndrome)

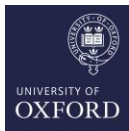

NUFFIELD DEPARTMENT OF  
**PRIMARY CARE**  
HEALTH SCIENCES

**Intervention:** treatment of HELLP syndrome (haemolysis, elevated liver enzymes and low platelets); prevention or management of eclampsia; prevention of postpartum hypertension; choice of anaesthetic or sedative in pre-eclampsia; observational studies

**Comparisons:** no control group

**Study design:** guidelines, reviews, expert opinions, letters, commentaries, audits, case series and case reports excluded; animal studies

### Data extraction

Two reviewers (AC and LP) will screen the titles and abstracts of articles yielded by the search against the eligibility criteria. Discrepancies will be resolved by consensus before determining the list of full papers for review. The reports will be screened independently by the two reviewers, and discrepancies will be resolved by discussion before deciding which papers to include in the review.

Data from included studies will be extracted independently by the two reviewers using a piloted and standardised data extraction sheet. Differences in data extraction will be resolved by discussion.

In the event that there is more than one report published about a single study: the reports will be reviewed separately but the data from that study grouped in our analysis, and the primary reference will be used.

In the event that data is missing from a report (for example the sole publication is a conference abstract) we will contact the authors directly to request further detail.

The study characteristics (study size, population, setting, study design, methodology, intervention, controls if applicable, outcome measures, and follow up period) will be recorded and reported.

### Data synthesis

The data extracted will be aggregate.

Due to the heterogeneous nature of the outcomes reported in these studies a narrative synthesis is planned.

For trials where the population study is peripartum (i.e. a mixture of antepartum, intrapartum and postpartum) we will extract the data for the postpartum women and analyse this. If this is not feasible from the reported data then we will contact the study authors to request the data for this subgroup.

### Outcomes

The results of all clinically relevant outcomes in hypertensive disorders of pregnancy that would be important to clinicians and patients will be extracted and reported.

The main outcomes we are interested in are listed in table 1 below:

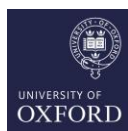

Table 1

|                             | Outcome measures                                                                                                                                                                                                                                                                                                                                 | Timing                                                                                      |
|-----------------------------|--------------------------------------------------------------------------------------------------------------------------------------------------------------------------------------------------------------------------------------------------------------------------------------------------------------------------------------------------|---------------------------------------------------------------------------------------------|
| <b>Primary outcome(s)</b>   | Maternal mortality<br>Major maternal morbidity (ischaemic stroke, intracranial haemorrhage, eclamptic seizure)<br>Systolic blood pressure control<br>Diastolic blood pressure control<br>Mean arterial pressure control                                                                                                                          | Direct maternal deaths upto day 42 postpartum; later maternal deaths upto 1 year postpartum |
| <b>Secondary outcome(s)</b> | Critical care admission<br>Postnatal readmission to secondary care<br>Length of hospital stay following delivery<br>Anti-hypertensive medication requirement<br>Maternal side effects of intervention<br>Development of pre-eclampsia with severe features<br>Postnatal complication requiring intervention<br>Urine output<br>Laboratory values |                                                                                             |

### Assessment of methodological quality

We will assess the risk of bias in each study. For randomised trials this will be done using the Cochrane Collaboration's tool for assessing risk of bias in randomised trials (Appendix 1, Table 2) (20). For each study the key domains will be identified, and then an overall assessment of bias within each trial made, according to the guidance published by the Cochrane Collaboration (Appendix 1, Table 2).

For the assessment of bias in cohort and case-control studies we will use the Newcastle-Ottawa quality assessment scales (Appendix 2, Tables 4 and 5) (21).

We will make a global assessment of bias across trials, based on the guidance from the Cochrane Collaboration (Appendix 1, Table 3):

- EITHER Most information is from trials at low risk of bias;
- OR most information is from trials at low or unclear risk of bias;
- OR the proportion of information from trials at high risk of bias is sufficient to affect the interpretation of results

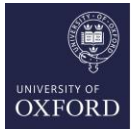**Discussion**

A Cochrane Review (2013) addresses the question of 'prevention and treatment of postpartum hypertension'. This only includes randomised controlled trials (9 in total), and does not address the issue of monitoring blood pressure during this period (22). Given the paucity of evidence cited in this area we believe there is a place for a review looking at all available evidence for the optimal approach to management of hypertensive disorders of pregnancy in the postpartum period.

**Conflicts of interest**

Neither AC nor LP have any conflicts of interest.

For peer review only

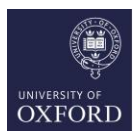

## References

1. National Institute for Health and Care Excellence. NICE Clinical Guideline 107: Hypertension in pregnancy: the management of hypertensive disorders during pregnancy. 2011.
2. Tranquilli AL, Dekker G, Magee L, Roberts J, Sibai BM, Steyn W, et al. The classification, diagnosis and management of the hypertensive disorders of pregnancy: A revised statement from the ISSHP. *Pregnancy Hypertension: An International Journal of Women's Cardiovascular Health*. 2014;4(2):97-104.
3. American College of Obstetricians and Gynecologists. Diagnosis and management of preeclampsia and eclampsia. *ACOG Practice Bulletin*. ACOG Practice Bulletin No. 33: 2002.
4. Cantwell R, Clutton-Brock T, Cooper G, Dawson A, Drife J, Garrod D, et al. Saving Mothers' Lives: Reviewing maternal deaths to make motherhood safer: 2006-2008. The Eighth Report of the Confidential Enquiries into Maternal Deaths in the United Kingdom. *BJOG : an international journal of obstetrics and gynaecology*. 2011;118 Suppl 1:1-203.
5. Knight M, Kenyon S, Brocklehurst P, Neilson J, Shakespeare J, Kurinczuk J. Saving Lives, Improving Mothers' Care (MBRRACE-UK). 2014.
6. Ananth CV, Keyes KM, Wapner RJ. Pre-eclampsia rates in the United States, 1980-2010: age-period-cohort analysis. *Bmj*. 2013;347:f6564.
7. Yoder SR, Thornburg LL, Bisognano JD. Hypertension in pregnancy and women of childbearing age. *The American journal of medicine*. 2009;122(10):890-5.
8. National Institute for Health and Care Excellence. NICE Clinical Guideline 107: Hypertension in pregnancy: Costing report. Implementing NICE guidance. 2010.
9. Wallis AB, Saftlas AF, Hsia J, Atrash HK. Secular trends in the rates of preeclampsia, eclampsia, and gestational hypertension, United States, 1987-2004. *American journal of hypertension*. 2008;21(5):521-6.
10. Sibai BM, Caritis SN, Thom E, Klebanoff M, McNellis D, Rocco L, et al. Prevention of preeclampsia with low-dose aspirin in healthy, nulliparous pregnant women. The National Institute of Child Health and Human Development Network of Maternal-Fetal Medicine Units. *The New England journal of medicine*. 1993;329(17):1213-8.
11. Chapman AB, Abraham WT, Zamudio S, Coffin C, Merouani A, Young D, et al. Temporal relationships between hormonal and hemodynamic changes in early human pregnancy. *Kidney international*. 1998;54(6):2056-63.
12. Mahendru AA, Everett TR, Wilkinson IB, Lees CC, McEniery CM. A longitudinal study of maternal cardiovascular function from preconception to the postpartum period. *Journal of hypertension*. 2014;32(4):849-56.
13. Visser W, Wallenburg HC. Central hemodynamic observations in untreated preeclamptic patients. *Hypertension*. 1991;17(6 Pt 2):1072-7.
14. Walters BN, Walters T. Hypertension in the puerperium. *Lancet*. 1987;2(8554):330.
15. Podymow T, August P. Postpartum course of gestational hypertension and preeclampsia. *Hypertension in pregnancy*. 2010;29(3):294-300.
16. Chames MC, Livingston JC, Ivester TS, Barton JR, Sibai BM. Late postpartum eclampsia: a preventable disease? *American journal of obstetrics and gynecology*. 2002;186(6):1174-7.
17. Martin JN, Jr., Thigpen BD, Moore RC, Rose CH, Cushman J, May W. Stroke and severe preeclampsia and eclampsia: a paradigm shift focusing on systolic blood pressure. *Obstetrics and gynecology*. 2005;105(2):246-54.
18. Moher D, Liberati A, Tetzlaff J, Altman DG, Group P. Preferred reporting items for systematic reviews and meta-analyses: the PRISMA statement. *PLoS medicine*. 2009;6(7):e1000097.
19. McManus RJ, Wilson S, Delaney BC, Fitzmaurice DA, Hyde CJ, Tobias RS, et al. Review of the usefulness of contacting other experts when conducting a literature search for systematic reviews. *Bmj*. 1998;317(7172):1562-3.

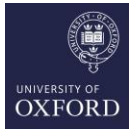

NUFFIELD DEPARTMENT OF  
**PRIMARY CARE**  
HEALTH SCIENCES

- 1
  - 2
  - 3
  - 4
  - 5
  - 6
  - 7
  - 8
  - 9
  - 10
  - 11
  - 12
  - 13
  - 14
  - 15
  - 16
  - 17
  - 18
  - 19
  - 20
  - 21
  - 22
  - 23
  - 24
  - 25
  - 26
  - 27
  - 28
  - 29
  - 30
  - 31
  - 32
  - 33
  - 34
  - 35
  - 36
  - 37
  - 38
  - 39
  - 40
  - 41
  - 42
  - 43
  - 44
  - 45
  - 46
  - 47
  - 48
  - 49
  - 50
  - 51
  - 52
  - 53
  - 54
  - 55
  - 56
  - 57
  - 58
  - 59
  - 60
20. Higgins JPT, Altman DG, Gøtzsche PC, Jüni P, Moher D, Oxman AD, et al. The Cochrane Collaboration's tool for assessing risk of bias in randomised trials. *BMJ* 2011;363:f2537. doi:10.1136/bmj.f2537.
21. Wells GA, Shea B, O'Connell D, J. P, V. W, M. L, et al. The Newcastle-Ottawa Scale (NOS) for assessing the quality of nonrandomised studies in meta-analyses. *BMJ* 2001;322:71-6.
22. Magee L, von Dadelszen P. Prevention and treatment of postpartum hypertension. *Cochrane database of systematic reviews*. 2013;4:CD004351.

For peer review only



## Appendix 1

**Table 2:** Cochrane Collaboration's tool for assessing risk of bias (*adapted from Higgins and Altman*)(20)

| Bias domain             | Source of bias                          | Support for judgment                                                                                                                                                                                                                                                                                                                                                    | Review authors' judgment (assess as low, unclear or high risk of bias)                                             |
|-------------------------|-----------------------------------------|-------------------------------------------------------------------------------------------------------------------------------------------------------------------------------------------------------------------------------------------------------------------------------------------------------------------------------------------------------------------------|--------------------------------------------------------------------------------------------------------------------|
| <b>Selection bias</b>   | Random sequence generation              | Describe the method used to generate the allocation sequence in sufficient detail to allow an assessment of whether it should produce comparable groups                                                                                                                                                                                                                 | Selection bias (biased allocation to interventions) due to inadequate generation of a randomised sequence          |
|                         | Allocation concealment                  | Describe the method used to conceal the allocation sequence in sufficient detail to determine whether intervention allocations could have been foreseen before or during enrolment                                                                                                                                                                                      | Selection bias (biased allocation to interventions) due to inadequate concealment of allocations before assignment |
| <b>Performance bias</b> | Blinding of participants and personnel* | Describe all measures used, if any, to blind trial participants and researchers from knowledge of which intervention a participant received. Provide any information relating to whether the intended blinding was effective                                                                                                                                            | Performance bias due to knowledge of the allocated interventions by participants and personnel during the study    |
| <b>Detection bias</b>   | Blinding of outcome assessment*         | Describe all measures used, if any, to blind outcome assessment from knowledge of which intervention a participant received. Provide any information relating to whether the intended blinding was effective                                                                                                                                                            | Detection bias due to knowledge of the allocated interventions by outcome assessment                               |
| <b>Attrition bias</b>   | Incomplete outcome data*                | Describe the completeness of outcome data for each main outcome, including attrition and exclusions from the analysis. State whether attrition and exclusions were reported, the numbers in each intervention group (compared with total randomised participants), reasons for attrition or exclusions where reported, and any re-inclusions in analyses for the review | Attrition bias due to amount, nature, or handling of incomplete outcome data                                       |
| <b>Reporting bias</b>   | Selective reporting                     | State how selective outcome reporting was examined and what                                                                                                                                                                                                                                                                                                             | Reporting bias due to selective                                                                                    |



|                   |                                         |                                                                                            |                                                     |
|-------------------|-----------------------------------------|--------------------------------------------------------------------------------------------|-----------------------------------------------------|
|                   |                                         | was found                                                                                  | outcome reporting                                   |
| <b>Other bias</b> | Anything else, ideally<br>Pre-specified | State any important concerns<br>about bias not covered in the other<br>domains in the tool | Bias due to<br>problems not<br>covered<br>elsewhere |

\*Assessments should be made for each main outcome or class of outcomes.

**Table 3:** Approach to formulating summary assessments of risk of bias for each important outcome (across domains) within and across trials (*adapted from Higgins and Altman*)(20)

| Risk of bias                | Interpretation                                               | Within a trial                                  | Across trials                                                                                                        |
|-----------------------------|--------------------------------------------------------------|-------------------------------------------------|----------------------------------------------------------------------------------------------------------------------|
| <b>Low risk of bias</b>     | Bias, if present, is unlikely to alter the results seriously | Low risk of bias for all key domains            | Most information is from trials at low risk of bias                                                                  |
| <b>Unclear risk of bias</b> | A risk of bias that raises some doubt about the results      | Low or unclear risk of bias for all key domains | Most information is from trials at low or unclear risk of bias                                                       |
| <b>High risk of bias</b>    | Bias may alter the results seriously                         | High risk of bias for one or more key domains   | The proportion of information from trials at high risk of bias is sufficient to affect the interpretation of results |



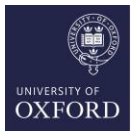

## Appendix 2

**Table 4: Newcastle-Ottawa quality assessment scale case control studies(21)**

A study can be awarded a maximum of one star for each numbered item within the Selection and Exposure categories. A maximum of two stars can be given for Comparability.

|                      |                                                                            |                                                                                                                                                                                                                                      |
|----------------------|----------------------------------------------------------------------------|--------------------------------------------------------------------------------------------------------------------------------------------------------------------------------------------------------------------------------------|
| <b>Selection</b>     | Is the case definition adequate?                                           | a) Yes, with independent validation ✱<br>b) Yes, e.g. record linkage or based on self-reports<br>c) No description                                                                                                                   |
|                      | Representativeness of the cases                                            | a) Consecutive or obviously representative series of cases ✱<br>b) Potential for selection biases not stated                                                                                                                         |
|                      | Selection of controls                                                      | a) Community controls ✱<br>b) Hospital controls<br>c) No description                                                                                                                                                                 |
|                      | Definition of controls                                                     | a) No history of disease (endpoint) ✱<br>b) No description of source                                                                                                                                                                 |
| <b>Comparability</b> | Comparability of cases and controls on the basis of the design or analysis | a) Study controls for <<_>> (select the post important factor) ✱<br>b) Study controls for any additional factor ✱                                                                                                                    |
| <b>Exposure</b>      | Ascertainment of exposure                                                  | a) Secure records (e.g. surgical records) ✱<br>b) Structured interview where blind to case/control status ✱<br>c) Interview not blinded to case/control status<br>d) Written self-report or medical record only<br>e) No description |
|                      | Same method of ascertainment for cases and controls                        | a) Yes ✱<br>b) No                                                                                                                                                                                                                    |
|                      | Non-response rate                                                          | a) Same rate for both groups ✱<br>b) Non-respondents described<br>c) Rate different and no designation                                                                                                                               |

**Table 5: Newcastle-Ottawa quality assessment scale cohort studies(21)**

A study can be awarded a maximum of one star for each numbered item within the Selection and Outcome categories. A maximum of two stars can be given for Comparability.

|                  |                                          |                                                                                                                                                                                                                                                                        |
|------------------|------------------------------------------|------------------------------------------------------------------------------------------------------------------------------------------------------------------------------------------------------------------------------------------------------------------------|
| <b>Selection</b> | Representativeness of the exposed cohort | a) Truly representative of the average <<_>> (describe) in the community ✱<br>b) Somewhat representative of the average <<_>> (describe) in the community ☐<br>c) Selected group of users e.g. nurses, volunteers<br>d) No description of the derivation of the cohort |
|                  | Selection of the non-exposed cohort      | a) Drawn from the same community as the exposed cohort ✱<br>b) Drawn from a different source<br>c) No description of the derivation of the non-exposed cohort                                                                                                          |
|                  | Ascertainment of exposure                | a) Secure record (e.g. surgical records) ✱<br>b) Structured interview ✱<br>c) Written self-report<br>d) No description                                                                                                                                                 |

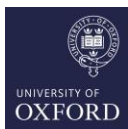

|                      |                                                                              |                                                                                                                                                                                                                                                                                                                  |
|----------------------|------------------------------------------------------------------------------|------------------------------------------------------------------------------------------------------------------------------------------------------------------------------------------------------------------------------------------------------------------------------------------------------------------|
|                      | Demonstration that the outcome of interest was not present at start of study | a) Yes *<br>b) No                                                                                                                                                                                                                                                                                                |
| <b>Comparability</b> | Comparability of cases and controls on the basis of the design or analysis   | a) Study controls for <<_>> (select the post important factor) *<br>b) Study controls for any additional factor *                                                                                                                                                                                                |
| <b>Outcome</b>       | Assessment of outcome                                                        | a) Independent blind assessment *<br>b) Record linkage *<br>c) Self-report<br>d) No description                                                                                                                                                                                                                  |
|                      | Was follow-up long enough for outcomes to occur                              | a) Yes (select an adequate follow up period for outcome of interest) *<br>b) No                                                                                                                                                                                                                                  |
|                      | Adequacy of follow-up of cohorts                                             | a) Complete follow-up – all subjects accounted for *<br>b) Subjects lost to follow-up unlikely to introduce bias: >_ _ % (select an adequate %) follow-up rate, or description provided of those lost) *<br>c) Follow-up rate < _ _ % (select an adequate %) and no description of those lost<br>d) No statement |



### Appendix 3: Medline search strategy

| # ▼ | Searches                                                                                                                                                                                                                                           | Results |
|-----|----------------------------------------------------------------------------------------------------------------------------------------------------------------------------------------------------------------------------------------------------|---------|
| 1   | Pregnancy/ and Hypertension/                                                                                                                                                                                                                       | 9226    |
| 2   | exp Hypertension, Pregnancy-Induced/                                                                                                                                                                                                               | 29022   |
| 3   | ((pregnan* or gestation* or maternal or prenatal or pre-natal or antenatal or ante-natal or antepart* or ante-part* or obstetric*) and (hypertens* or blood pressure or bp or dbp or sbp or diastolic or systolic)).ti.                            | 6787    |
| 4   | ((pregnan* or gestation* or maternal or prenatal or pre-natal or antenatal or ante-natal or antepart* or ante-part* or obstetric*) adj3 (hypertens* or blood pressure or bp or dbp or sbp or diastolic or systolic)).ti,ab.                        | 12434   |
| 5   | (eclamp* or preeclamp* or pre-eclamp* or hellp).ti,ab.                                                                                                                                                                                             | 25194   |
| 6   | 1 or 2 or 3 or 4 or 5                                                                                                                                                                                                                              | 46611   |
| 7   | Postnatal Care/                                                                                                                                                                                                                                    | 4044    |
| 8   | Aftercare/                                                                                                                                                                                                                                         | 6684    |
| 9   | Postpartum Period/ and Maternal Health Services/                                                                                                                                                                                                   | 126     |
| 10  | exp Puerperal Disorders/ and Maternal Health Services/                                                                                                                                                                                             | 196     |
| 11  | Postpartum period/ and (exp Antihypertensive agents/ or exp calcium channel blockers/ or exp Angiotensin-Converting Enzyme Inhibitors/ or exp Adrenergic beta-Antagonists/ or exp Diuretics/)                                                      | 187     |
| 12  | exp Puerperal disorders/ and (exp Antihypertensive agents/ or exp calcium channel blockers/ or exp Angiotensin-Converting Enzyme Inhibitors/ or exp Adrenergic beta-Antagonists/ or exp Diuretics/)                                                | 237     |
| 13  | Postpartum period/ and exp Curettage/                                                                                                                                                                                                              | 30      |
| 14  | exp Puerperal disorders/ and exp Curettage/                                                                                                                                                                                                        | 118     |
| 15  | Postpartum period/ and hypertension/dt, th                                                                                                                                                                                                         | 33      |
| 16  | exp Puerperal disorders/ and hypertension/dt, th                                                                                                                                                                                                   | 54      |
| 17  | exp Puerperal disorders/dt, th                                                                                                                                                                                                                     | 6408    |
| 18  | ((postnatal or post-natal or postpart* or post-part* or puerper*) adj5 (care or healthcare or service* or program* or scheme* or intervention*)).ti,ab.                                                                                            | 4407    |
| 19  | ((postnatal or post-natal or postpart* or post-part* or puerper*) adj5 (clinic? or unit? or visit* or referral? or appointment?)).ti,ab.                                                                                                           | 1491    |
| 20  | ((postnatal or post-natal or postpart* or post-part* or puerper*) adj5 (manage* or treat* or therap* or medication? or recovery)).ti,ab.                                                                                                           | 7287    |
| 21  | ((postnatal or post-natal or postpart* or post-part* or puerper*) adj5 (antihypertens* or anti-hypertens* or calcium channel block* or beta block* or b block* or ace inhibitor* or angiotensin converting enzyme inhibitor* or diuretic*)).ti,ab. | 41      |
| 22  | ((postnatal or post-natal or postpart* or post-part* or puerper*) adj5 (evaluat* or assess* or screen* or diagnos* or monitor* or follow up or supervis*)).ti,ab.                                                                                  | 7562    |
| 23  | ((postnatal or post-natal or postpart* or post-part* or puerper*) adj5 curet*).ti,ab.                                                                                                                                                              | 82      |
| 24  | (postnatal or post-natal or postpart* or post-part* or puerper*).ti.                                                                                                                                                                               | 41491   |
| 25  | 7 or 8 or 9 or 10 or 11 or 12 or 13 or 14 or 15 or 16 or 17 or 18 or 19 or 20 or 21 or 22 or 23 or 24                                                                                                                                              | 64775   |



NUFFIELD DEPARTMENT OF  
**PRIMARY CARE**  
 HEALTH SCIENCES

|    |    |                                                                                                                                                                                                                                             |         |
|----|----|---------------------------------------------------------------------------------------------------------------------------------------------------------------------------------------------------------------------------------------------|---------|
| 1  |    |                                                                                                                                                                                                                                             |         |
| 2  |    |                                                                                                                                                                                                                                             |         |
| 3  |    |                                                                                                                                                                                                                                             |         |
| 4  |    |                                                                                                                                                                                                                                             |         |
| 5  | 26 | 6 and 25                                                                                                                                                                                                                                    | 1896    |
| 6  | 27 | ((postnatal or post-natal or postpart* or post-part* or puerper*) and (hypertens* or blood pressure)).ti.                                                                                                                                   | 270     |
| 7  |    |                                                                                                                                                                                                                                             |         |
| 8  |    |                                                                                                                                                                                                                                             |         |
| 9  | 28 | 26 or 27                                                                                                                                                                                                                                    | 1990    |
| 10 | 29 | exp animals/ not humans.sh.                                                                                                                                                                                                                 | 4079856 |
| 11 | 30 | (rat or rats or rodent? or mice or mouse or cow or cows or cattle or calf or calves or ewe? or sheep or goat or ruminant? or pig or pigs or minipig? or chicken? or horse or horses or murine or bovine or ovine or porcine or animal?).ti. | 1682619 |
| 12 |    |                                                                                                                                                                                                                                             |         |
| 13 |    |                                                                                                                                                                                                                                             |         |
| 14 |    |                                                                                                                                                                                                                                             |         |
| 15 |    |                                                                                                                                                                                                                                             |         |
| 16 | 31 | 29 or 30                                                                                                                                                                                                                                    | 4373527 |
| 17 | 32 | 28 not 31                                                                                                                                                                                                                                   | 1881    |
| 18 |    |                                                                                                                                                                                                                                             |         |
| 19 |    |                                                                                                                                                                                                                                             |         |
| 20 |    |                                                                                                                                                                                                                                             |         |
| 21 |    |                                                                                                                                                                                                                                             |         |
| 22 |    |                                                                                                                                                                                                                                             |         |
| 23 |    |                                                                                                                                                                                                                                             |         |
| 24 |    |                                                                                                                                                                                                                                             |         |
| 25 |    |                                                                                                                                                                                                                                             |         |
| 26 |    |                                                                                                                                                                                                                                             |         |
| 27 |    |                                                                                                                                                                                                                                             |         |
| 28 |    |                                                                                                                                                                                                                                             |         |
| 29 |    |                                                                                                                                                                                                                                             |         |
| 30 |    |                                                                                                                                                                                                                                             |         |
| 31 |    |                                                                                                                                                                                                                                             |         |
| 32 |    |                                                                                                                                                                                                                                             |         |
| 33 |    |                                                                                                                                                                                                                                             |         |
| 34 |    |                                                                                                                                                                                                                                             |         |
| 35 |    |                                                                                                                                                                                                                                             |         |
| 36 |    |                                                                                                                                                                                                                                             |         |
| 37 |    |                                                                                                                                                                                                                                             |         |
| 38 |    |                                                                                                                                                                                                                                             |         |
| 39 |    |                                                                                                                                                                                                                                             |         |
| 40 |    |                                                                                                                                                                                                                                             |         |
| 41 |    |                                                                                                                                                                                                                                             |         |
| 42 |    |                                                                                                                                                                                                                                             |         |
| 43 |    |                                                                                                                                                                                                                                             |         |
| 44 |    |                                                                                                                                                                                                                                             |         |
| 45 |    |                                                                                                                                                                                                                                             |         |
| 46 |    |                                                                                                                                                                                                                                             |         |
| 47 |    |                                                                                                                                                                                                                                             |         |
| 48 |    |                                                                                                                                                                                                                                             |         |
| 49 |    |                                                                                                                                                                                                                                             |         |
| 50 |    |                                                                                                                                                                                                                                             |         |
| 51 |    |                                                                                                                                                                                                                                             |         |
| 52 |    |                                                                                                                                                                                                                                             |         |
| 53 |    |                                                                                                                                                                                                                                             |         |
| 54 |    |                                                                                                                                                                                                                                             |         |
| 55 |    |                                                                                                                                                                                                                                             |         |
| 56 |    |                                                                                                                                                                                                                                             |         |
| 57 |    |                                                                                                                                                                                                                                             |         |
| 58 |    |                                                                                                                                                                                                                                             |         |
| 59 |    |                                                                                                                                                                                                                                             |         |
| 60 |    |                                                                                                                                                                                                                                             |         |

For peer review only

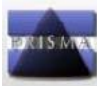**Appendix S2: PRISMA 2009 Checklist**1  
2  
3  
4  
5  
6  
7  
8  
9  
10  
11  
12  
13  
14  
15  
16  
17  
18  
19  
20  
21  
22  
23  
24  
25  
26  
27  
28  
29  
30  
31  
32  
33  
34  
35  
36  
37  
38  
39  
40  
41  
42  
43  
44  
45  
46  
47  
48  
49

| Section/topic                      | #  | Checklist item                                                                                                                                                                                                                                                                                              | Reported on page # |
|------------------------------------|----|-------------------------------------------------------------------------------------------------------------------------------------------------------------------------------------------------------------------------------------------------------------------------------------------------------------|--------------------|
| <b>TITLE</b>                       |    |                                                                                                                                                                                                                                                                                                             |                    |
| Title                              | 1  | Identify the report as a systematic review, meta-analysis, or both.                                                                                                                                                                                                                                         | 1                  |
| <b>ABSTRACT</b>                    |    |                                                                                                                                                                                                                                                                                                             |                    |
| Structured summary                 | 2  | Provide a structured summary including, as applicable: background; objectives; data sources; study eligibility criteria, participants, and interventions; study appraisal and synthesis methods; results; limitations; conclusions and implications of key findings; systematic review registration number. | 2                  |
| <b>INTRODUCTION</b>                |    |                                                                                                                                                                                                                                                                                                             |                    |
| Rationale                          | 3  | Describe the rationale for the review in the context of what is already known.                                                                                                                                                                                                                              | 5                  |
| Objectives                         | 4  | Provide an explicit statement of questions being addressed with reference to participants, interventions, comparisons, outcomes, and study design (PICOS).                                                                                                                                                  | 5-6                |
| <b>METHODS</b>                     |    |                                                                                                                                                                                                                                                                                                             |                    |
| Protocol and registration          | 5  | Indicate if a review protocol exists, if and where it can be accessed (e.g., Web address), and, if available, provide registration information including registration number.                                                                                                                               | 6                  |
| Eligibility criteria               | 6  | Specify study characteristics (e.g., PICOS, length of follow-up) and report characteristics (e.g., years considered, language, publication status) used as criteria for eligibility, giving rationale.                                                                                                      | 6                  |
| Information sources                | 7  | Describe all information sources (e.g., databases with dates of coverage, contact with study authors to identify additional studies) in the search and date last searched.                                                                                                                                  | 6                  |
| Search                             | 8  | Present full electronic search strategy for at least one database, including any limits used, such that it could be repeated.                                                                                                                                                                               | Appendix S1        |
| Study selection                    | 9  | State the process for selecting studies (i.e., screening, eligibility, included in systematic review, and, if applicable, included in the meta-analysis).                                                                                                                                                   | 6                  |
| Data collection process            | 10 | Describe method of data extraction from reports (e.g., piloted forms, independently, in duplicate) and any processes for obtaining and confirming data from investigators.                                                                                                                                  | 6-7                |
| Data items                         | 11 | List and define all variables for which data were sought (e.g., PICOS, funding sources) and any assumptions and simplifications made.                                                                                                                                                                       | 6-7; Table 1       |
| Risk of bias in individual studies | 12 | Describe methods used for assessing risk of bias of individual studies (including specification of whether this was done at the study or outcome level), and how this information is to be used in any data synthesis.                                                                                      | 7                  |
| Summary measures                   | 13 | State the principal summary measures (e.g., risk ratio, difference in means).                                                                                                                                                                                                                               | 6-7 (narrative)    |
| Synthesis of results               | 14 | Describe the methods of handling data and combining results of studies, if done, including measures of consistency (e.g., $I^2$ ) for each meta-analysis.                                                                                                                                                   | N/A                |

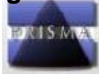

## Appendix S2: PRISMA 2009 Checklist

1  
2  
3  
4  
5  
6  
7  
8  
9  
10  
11  
12  
13  
14  
15  
16  
17  
18  
19  
20  
21  
22  
23  
24  
25  
26  
27  
28  
29  
30  
31  
32  
33  
34  
35  
36  
37  
38  
39  
40  
41  
42  
43  
44  
45  
46  
47  
48  
49

| Section/topic                 | #  | Checklist item                                                                                                                                                                                           | Reported on page #             |
|-------------------------------|----|----------------------------------------------------------------------------------------------------------------------------------------------------------------------------------------------------------|--------------------------------|
| Risk of bias across studies   | 15 | Specify any assessment of risk of bias that may affect the cumulative evidence (e.g., publication bias, selective reporting within studies).                                                             | 7                              |
| Additional analyses           | 16 | Describe methods of additional analyses (e.g., sensitivity or subgroup analyses, meta-regression), if done, indicating which were pre-specified.                                                         | N/A                            |
| <b>RESULTS</b>                |    |                                                                                                                                                                                                          |                                |
| Study selection               | 17 | Give numbers of studies screened, assessed for eligibility, and included in the review, with reasons for exclusions at each stage, ideally with a flow diagram.                                          | 7; Figure 1                    |
| Study characteristics         | 18 | For each study, present characteristics for which data were extracted (e.g., study size, PICOS, follow-up period) and provide the citations.                                                             | 7; Appendix S4                 |
| Risk of bias within studies   | 19 | Present data on risk of bias of each study and, if available, any outcome level assessment (see item 12).                                                                                                | 7-8; Appendix S6               |
| Results of individual studies | 20 | For all outcomes considered (benefits or harms), present, for each study: (a) simple summary data for each intervention group (b) effect estimates and confidence intervals, ideally with a forest plot. | 8-13; Tables 2a+b; Appendix S5 |
| Synthesis of results          | 21 | Present results of each meta-analysis done, including confidence intervals and measures of consistency.                                                                                                  | N/A                            |
| Risk of bias across studies   | 22 | Present results of any assessment of risk of bias across studies (see Item 15).                                                                                                                          | 7-8; Appendix S6               |
| Additional analysis           | 23 | Give results of additional analyses, if done (e.g., sensitivity or subgroup analyses, meta-regression [see Item 16]).                                                                                    | N/A                            |
| <b>DISCUSSION</b>             |    |                                                                                                                                                                                                          |                                |
| Summary of evidence           | 24 | Summarize the main findings including the strength of evidence for each main outcome; consider their relevance to key groups (e.g., healthcare providers, users, and policy makers).                     | 13-16                          |
| Limitations                   | 25 | Discuss limitations at study and outcome level (e.g., risk of bias), and at review-level (e.g., incomplete retrieval of identified research, reporting bias).                                            | 14-15                          |
| Conclusions                   | 26 | Provide a general interpretation of the results in the context of other evidence, and implications for future research.                                                                                  | 15-16                          |
| <b>FUNDING</b>                |    |                                                                                                                                                                                                          |                                |
| Funding                       | 27 | Describe sources of funding for the systematic review and other support (e.g., supply of data); role of funders for the systematic review.                                                               | 17                             |

**Appendix S3: Primary reasons for article exclusion (n = 35)**

|                  | Population not postnatal                                | Intervention not targeted at management of BP                                                               | No control group                                                                                                                                                                                                                                                                                                                                                | Study design                                                     |
|------------------|---------------------------------------------------------|-------------------------------------------------------------------------------------------------------------|-----------------------------------------------------------------------------------------------------------------------------------------------------------------------------------------------------------------------------------------------------------------------------------------------------------------------------------------------------------------|------------------------------------------------------------------|
| <b>n</b>         | 4                                                       | 6                                                                                                           | 22                                                                                                                                                                                                                                                                                                                                                              | 3                                                                |
| <b>Study IDs</b> | Berks 2015<br>Gerard 1983<br>Scardo 1999<br>Wacker 2006 | Chandrasekaran 2015<br>Ehrenberg 2004<br>Ehrenberg 2006<br>Ossada 2016<br>Wasden 2012<br>Younger-Lewis 2016 | Al Waili 2004<br>Alicino 1962<br>Barton 1991<br>Belfort 1988<br>Belfort 1992<br>Bittle 2014<br>Bosio 2003<br>Correa 1982<br>Dulitzky 1987<br>Hirshberg 2016<br>Hirshberg 2017<br>Hunter 1961<br>Onishi 2015<br>Robinson 1964<br>Rodriguez 2012<br>Saghir<br>Smith 2005<br>Sukerman-Voldman 1985<br>Taslimi 1991<br>Tkacheva 2006<br>Wacker 1994<br>Walters 1984 | Editor, Emergency Medicine 1990<br>Cursino 2015<br>Gallegos 1961 |

## APPENDIX S4: Main characteristics of included studies (n=39)

| Author and year                                  | Methods                    |                                                      | Participants |                      |                            |         | Intervention                                                                                    |                                                                                                               |                                                                        | Outcomes                                                                                                                                                                                                      |  |
|--------------------------------------------------|----------------------------|------------------------------------------------------|--------------|----------------------|----------------------------|---------|-------------------------------------------------------------------------------------------------|---------------------------------------------------------------------------------------------------------------|------------------------------------------------------------------------|---------------------------------------------------------------------------------------------------------------------------------------------------------------------------------------------------------------|--|
|                                                  | Study design               | Duration                                             | n*           | Age /y†              | Setting                    | Country | Intervention                                                                                    | Control(s)                                                                                                    | Primary                                                                | Secondary                                                                                                                                                                                                     |  |
| <b>ANTIHYPERTENSIVE MEDICATIONS (18 studies)</b> |                            |                                                      |              |                      |                            |         |                                                                                                 |                                                                                                               |                                                                        |                                                                                                                                                                                                               |  |
| <b>Calcium channel blockers</b>                  |                            |                                                      |              |                      |                            |         |                                                                                                 |                                                                                                               |                                                                        |                                                                                                                                                                                                               |  |
| Barton 1990 <sup>32</sup>                        | RCT                        | Enrolled immediately after birth F/U 48h             | 31           | 24.0<br>26.3         | Tertiary referral hospital | USA     | Nifedipine 10mg PO 4-hourly for 48 hours                                                        | Placebo                                                                                                       | MAP                                                                    | SBP, DBP<br>Maternal heart rate<br>AHT requirement<br>Urine output<br>Laboratory values (urine protein, creatinine clearance, HCT, plt, ALT, BUN, creatinine, serum electrolytes, UA, urine specific gravity) |  |
| Vermillion 1999 <sup>21</sup>                    | RCT                        | Enrolled within 24h of birth F/U 3 – 24h             | 21           | 27.2±7.3<br>27.0±6.4 | Tertiary referral hospital | USA     | Nifedipine 10mg stat PO then 20mg every 20min until BP <160/110mmHg or max 5 doses + IV placebo | Labetalol 20mg, then 40mg, then 80mg IV every 20min until BP <160/110mmHg or max 5 doses (300mg) + PO placebo | SBP + DBP                                                              | SBP (failure to achieve target <160mmHg)<br>DBP (failure to achieve target <110mmHg)<br>Maternal side effects<br>AHT requirement<br>Urine output                                                              |  |
| Sayin 2005 <sup>34</sup>                         | RCT                        | Enrolled 24h after birth F/U 72h after BP controlled | 83           | 17-41                | Tertiary referral hospital | Turkey‡ | Nifedipine 10mg PO QDS until BP <150/100mmHg for 48h                                            | Methyldopa 250mg PO TDS                                                                                       | SBP + DBP                                                              | Maternal mortality<br>AHT requirement<br>Hypertensive retinopathy                                                                                                                                             |  |
| <b>Vasodilators</b>                              |                            |                                                      |              |                      |                            |         |                                                                                                 |                                                                                                               |                                                                        |                                                                                                                                                                                                               |  |
| Palot 1979 <sup>36</sup>                         | Retrospective cohort study | Not specified                                        | 54           | 24.5 (17-37)         | Not specified              | France‡ | Hydralazine 5mg IV stat then 1% IV infusion, furosemide 20mg IV stat and 30% hypertonic glucose | (1) Clonidine IV and furosemide 20mg IV stat<br>Or (2) Non-systematic treatment                               | Maternal morbidity (development of pre-eclampsia with severe features) | BP (time to resolution of hypertension)                                                                                                                                                                       |  |

**Abbreviations:** AHT = antihypertensive; ALT = alanine aminotransferase; BD = twice daily; BP = blood pressure; BUN = blood urea nitrogen; DBP = diastolic blood pressure; F/U = follow-up; IM = intramuscular; IV = intravenous; MAP = mean arterial pressure; plt = platelets; PN = postnatal; OD = once daily; PO = oral; QDS = four times daily; RCT = randomised controlled trial; SBP = systolic blood pressure; S/L = sublingual; TDS = three times daily; UA = uric acid

\* n = postnatal population (antenatal excluded)

† Where separate data available for study groups, intervention group listed first

‡ Non-English language manuscript



| Author and year                    | Methods                |                                                   | Participants |                          |                            |              | Intervention                                                                                                          |                                                                                                                                  |           | Outcomes                                                                                                                                                           |  |
|------------------------------------|------------------------|---------------------------------------------------|--------------|--------------------------|----------------------------|--------------|-----------------------------------------------------------------------------------------------------------------------|----------------------------------------------------------------------------------------------------------------------------------|-----------|--------------------------------------------------------------------------------------------------------------------------------------------------------------------|--|
|                                    | Study design           | Duration                                          | n*           | Age /y†                  | Setting                    | Country      | Intervention                                                                                                          | Control(s)                                                                                                                       | Primary   | Secondary                                                                                                                                                          |  |
| Griffis 1989 <sup>38</sup><br>39   | RCT                    | F/U 24h                                           | 26           | Not specified            | Tertiary referral hospital | USA          | Hydralazine 20mg IM QDS for 24h                                                                                       | Methyldopa 250mg IV QDS x 24h                                                                                                    | MAP       | Maternal side effects<br>AHT requirement<br>Urine output (time to diuresis)                                                                                        |  |
| Walss Rodriguez 1991 <sup>40</sup> | RCT                    | Not specified                                     | 38           | 16-40                    | Not specified              | Mexico†      | Hydralazine 40mg PO QDS, duration not specified; if DBP >110mmHg PRN nifedipine 10mg SL every 30min, to max 3 doses   | Nifedipine 10mg SL every 30min if DBP ≥110mmHg                                                                                   | SBP       | DBP<br>AHT requirement                                                                                                                                             |  |
| Begum 2002 <sup>17</sup>           | Quasi-randomised trial | Not specified                                     | 15           | 24.09±4.93<br>22.72±5.08 | Tertiary referral hospital | Bangladesh   | Hydralazine 5mg then 2mg IV bolus every 15min until DBP 90-95mmHg                                                     | Hydralazine 20mg/200ml normal saline IV infusion; 10 drops per min, increased by 5 drops at 15min intervals; until DBP 90-95mmHg | DBP       | Maternal side effects<br>AHT requirement<br>Maternal heart rate                                                                                                    |  |
| Vigil-De Gracia 2007 <sup>35</sup> | RCT                    | Enrolled day 2-3 after birth<br>F/U not specified | 82           | 29.9±5.9<br>31.3±5.5     | Tertiary referral hospital | Panama       | Hydralazine 5mg IV every 20min until BP <160/110mmHg or max 5 doses                                                   | Labetalol 20mg, then 40mg, then 80mg IV every 20min until BP <160/110mmHg or max 5 doses (300mg)                                 | SBP + DBP | Maternal mortality<br>Maternal morbidity (development of pre-eclampsia with severe features)<br>Maternal side effects<br>AHT requirement<br>Maternal heart rate    |  |
| Hennessy 2007 <sup>23</sup>        | RCT                    | F/U 3h                                            | 37           | 21-43 (mean 33)          | Tertiary referral hospital | Australia    | Diazoxide 15mg IV every min, maximum dose 300mg                                                                       | Hydralazine 5mg IV every 2min, maximum 15mg                                                                                      | SBP + DBP | SBP (10mmHg above target after 1 hour)<br>DBP (10mmHg above target after 1 hour)<br>Maternal side effects (including hypotension)<br>Time taken to administer drug |  |
| <b>Beta blockers</b>               |                        |                                                   |              |                          |                            |              |                                                                                                                       |                                                                                                                                  |           |                                                                                                                                                                    |  |
| Garden 1982 <sup>24</sup>          | RCT                    | Enrolled immediately after birth<br>F/U 45-64h    | 6            | 25-44<br>20-28           | Tertiary referral hospital | South Africa | Labetalol 200mg/200ml 5% dextrose, 20mg/h IV infusion, doubled every 30min until DBP <100mmHg or maximum dose 160mg/h | Dihydralazine 100mg/200ml 5% dextrose, 10mg/h IV infusion, doubled every 30min until DBP <100mmHg or maximum dose 80mg/h         | DBP       | Maternal side effects                                                                                                                                              |  |
| Fidler 1982 <sup>42</sup>          | RCT                    | Enrolled 4 days after birth<br>F/U 9 days         | 80           | 29.7±1.0<br>27.8±0.9     | Tertiary referral hospital | UK           | Timolol 5mg PO TDS for 9 days                                                                                         | Methyldopa 250mg PO TDS for 9 days                                                                                               | DBP       | SBP<br>DBP (time to achieve control, proportion achieving control)<br>Maternal side effects                                                                        |  |

| Author and year                   | Methods                    |                                            | Participants |                      |                            |              | Intervention                                                                                                |                                                           | Outcomes                            |                                                                                                                                                                                                                                                 |
|-----------------------------------|----------------------------|--------------------------------------------|--------------|----------------------|----------------------------|--------------|-------------------------------------------------------------------------------------------------------------|-----------------------------------------------------------|-------------------------------------|-------------------------------------------------------------------------------------------------------------------------------------------------------------------------------------------------------------------------------------------------|
|                                   | Study design               | Duration                                   | n*           | Age /y†              | Setting                    | Country      | Intervention                                                                                                | Control(s)                                                | Primary                             | Secondary                                                                                                                                                                                                                                       |
| Mabie 1987 <sup>22</sup>          | RCT                        | Enrolled 1-96 hours after birth<br>F/U 3h  | 41           | 23.7±6.9<br>22.9±7.0 | Tertiary referral hospital | USA          | Labetalol 20mg IV every 10min then escalating until DBP <100mmHg or maximum cumulative dose reached (300mg) | Hydralazine 5mg IV every 10min until DBP <100mmHg         | MAP                                 | MAP (time to maximal decrease)<br>DBP (achieving target <100mmHg)<br>Maternal side effects<br>AHT requirement<br>Maternal heart rate                                                                                                            |
| Shumard 2016 <sup>41</sup>        | Retrospective cohort study | F/U not specified (but >24h)               | 128          | Not specified        | Not specified              | USA          | Labetalol PO (variable dose and frequency)                                                                  | Nifedipine PO (variable dose and frequency)               | Length of hospital stay after birth | SBP, DBP<br>AHT requirement                                                                                                                                                                                                                     |
| Sharma 2017 <sup>27, 28</sup>     | RCT                        | F/U not specified (but >24h)               | 50           | Not specified        | Tertiary referral hospital | USA          | Labetalol 200mg PO BD                                                                                       | Nifedipine XL 30mg PO OD                                  | SBP + DBP                           | Maternal side-effects<br>Length of PN hospital stay<br>AHT requirement                                                                                                                                                                          |
| <b>Other</b>                      |                            |                                            |              |                      |                            |              |                                                                                                             |                                                           |                                     |                                                                                                                                                                                                                                                 |
| Gaisin 2013 <sup>25</sup>         | RCT                        | 6 months                                   | 30           | 23-29                | Not specified (hospital)   | Russia       | Indapamide 1.5mg PO OD, duration unclear                                                                    | Adjusted dose methyldopa                                  | SBP + DBP                           | Safety data<br>Laboratory values (lipid and glucose metabolism)<br>Adherence to treatment<br>Weight reduction<br>Decrease in albuminuria<br>Decrease in LV mass index<br>Endothelial function<br>Milk production                                |
| Gaisin 2014 <sup>37</sup>         | RCT                        | 1 year                                     | 30           | 24-28                | Not specified (hospital)   | Russia       | Indapamide 1.5mg PO OD with ursodeoxycholic acid 250mg PO TDS, duration unclear                             | Adjusted dose methyldopa                                  | SBP + DBP                           | Maternal side effects<br>Laboratory values (atherogenic lipid profile, glucose metabolism, renal function)<br>Offspring adverse events<br>Weight reduction<br>Decrease in microalbuminuria<br>Decrease in LV mass index<br>Endothelial function |
| Krebs 1956 <sup>43,44</sup>       | Retrospective cohort study | F/U not specified (but >24h)               | 140          | Not specified        | Not specified              | Switzerland† | Reserpine 0.25mg PO or IM TDS or QDS for 7 days                                                             | Phenobarbital                                             | SBP + DBP                           | SBP + DBP (non-responders)<br>Maternal side effects<br>Resolution of albuminuria<br>Resolution of oedema                                                                                                                                        |
| Katz 2015 <sup>29,31</sup>        | RCT                        | F/U not specified                          | 90           | Not specified        | Tertiary referral hospital | Brazil       | Clonidine 0.1mg PO repeated every 20min to maximum 6 doses                                                  | Captopril 25mg PO repeated every 20min to maximum 6 doses | SBP + DBP                           | SBP (% reduction)<br>SBP + DBP (daily mean)<br>Maternal side effects<br>AHT requirement                                                                                                                                                         |
| <b>LOOP DIURETICS (3 studies)</b> |                            |                                            |              |                      |                            |              |                                                                                                             |                                                           |                                     |                                                                                                                                                                                                                                                 |
| Matthews 1997 <sup>46</sup>       | RCT                        | Enrolled 12-24h after birth<br>F/U 6 weeks | 19           | Not specified        | Tertiary referral hospital | UK           | Furosemide 40mg PO OD for 7 days                                                                            | Placebo                                                   | MAP                                 | Length of PN hospital stay<br>AHT requirement<br>Urine output<br>Laboratory values (hypokalemia)                                                                                                                                                |

| Author and year                   | Methods         |                                                       | Participants |                          |                            |         | Intervention                                                                                                                                            |                                   |           | Outcomes                                                                                                                                                                                       |  |
|-----------------------------------|-----------------|-------------------------------------------------------|--------------|--------------------------|----------------------------|---------|---------------------------------------------------------------------------------------------------------------------------------------------------------|-----------------------------------|-----------|------------------------------------------------------------------------------------------------------------------------------------------------------------------------------------------------|--|
|                                   | Study design    | Duration                                              | n*           | Age /y†                  | Setting                    | Country | Intervention                                                                                                                                            | Control(s)                        | Primary   | Secondary                                                                                                                                                                                      |  |
| Ascarelli 2005 <sup>16</sup>      | RCT             | Enrolled 2-24h after birth<br>F/U 6 weeks             | 264          | 22.8±6.1<br>22.9±6.0     | Tertiary referral hospital | USA     | Furosemide 20mg PO OD +<br>potassium 20mEq PO OD for 5 days                                                                                             | No intervention                   | SBP       | Maternal morbidity (postnatal complication requiring intervention)<br>DBP<br>Length of PN hospital stay<br>AHT requirement<br>Maternal weight<br>Maternal HR<br>Duration of magnesium sulphate |  |
| Amorim 2015 <sup>45</sup>         | RCT             | Enrolled immediately after birth<br>F/U 5 days        | 120          | Not specified            | Tertiary referral hospital | Brazil  | Furosemide 40mg PO OD,<br>duration not specified                                                                                                        | Placebo                           | SBP + DBP | MAP<br>SBP (daily episodes ≥180mmHg)<br>DBP (daily episodes ≥110mmHg)<br>Length of PN hospital stay<br>AHT requirement<br>Urine output<br>Maternal heart rate                                  |  |
| Veena 2017 <sup>19</sup>          | RCT             | Enrolled <24h after birth                             | 100          | 24.34±4.31<br>24.02±4.27 | Tertiary referral hospital | India   | Furosemide 20mg PO OD +<br>nifedipine 10mg PO TDS for 3 days                                                                                            | Nifedipine 10mg PO TDS for 3 days | SBP + DBP | MAP<br>Maternal morbidity (postnatal complication requiring intervention)<br>Length of hospital stay after birth<br>Antihypertensive medication requirement<br>Urine output                    |  |
| <b>OTHER DRUGS (7 studies)</b>    |                 |                                                       |              |                          |                            |         |                                                                                                                                                         |                                   |           |                                                                                                                                                                                                |  |
| <b>Selective 5-HT antagonists</b> |                 |                                                       |              |                          |                            |         |                                                                                                                                                         |                                   |           |                                                                                                                                                                                                |  |
| Weiner 1982 <sup>48</sup>         | RCT (crossover) | F/U not specified                                     | 5            | Not specified            | Tertiary referral          | USA     | R41468 IV (dose not specified) bolus then infusion for 90min                                                                                            | Placebo                           | MAP       | MAP (rate at which hypertension returned post-infusion)<br>Urine output (infusion related diuresis)                                                                                            |  |
| Weiner 1984 <sup>49</sup>         | RCT (crossover) | Enrolled immediately after birth<br>F/U 3.5h          | 20           | 28±6.4                   | Tertiary referral          | USA     | Ketanserin 10mg IV bolus then 4mg/hr IV infusion. Repeat bolus after 5min if no response.                                                               | Placebo                           | SBP + DBP | Maternal side effects<br>DBP (target <95mmHg)<br>MAP<br>AHT requirement<br>Response rate                                                                                                       |  |
| Montenegro 1985 <sup>50</sup>     | RCT (crossover) | Enrolled immediately after birth<br>F/U not specified | 30           | 21.5 (13-31)             | Tertiary referral hospital | USA     | Ketanserin 10mg IV bolus, repeated if no response. If no response to second bolus IV infusion 4mg/hr (increments of 2mg/hr every 10min to max 12mg/hr). | Placebo                           | MAP       | Maternal side effects                                                                                                                                                                          |  |

| Author and year                      | Methods                    |                                                                 | Participants |                                  |                            |          | Intervention                                            |                                           |                                               | Outcomes                                                                                                                                                                                                                                                                                                                                                              |  |
|--------------------------------------|----------------------------|-----------------------------------------------------------------|--------------|----------------------------------|----------------------------|----------|---------------------------------------------------------|-------------------------------------------|-----------------------------------------------|-----------------------------------------------------------------------------------------------------------------------------------------------------------------------------------------------------------------------------------------------------------------------------------------------------------------------------------------------------------------------|--|
|                                      | Study design               | Duration                                                        | n*           | Age /y†                          | Setting                    | Country  | Intervention                                            | Control(s)                                | Primary                                       | Secondary                                                                                                                                                                                                                                                                                                                                                             |  |
| <b>Alternative therapies</b>         |                            |                                                                 |              |                                  |                            |          |                                                         |                                           |                                               |                                                                                                                                                                                                                                                                                                                                                                       |  |
| Hladunewich 2006 <sup>51</sup>       | RCT                        | Enrolled immediately after birth F/U 10 days                    | 45           | 29±6<br>28±7                     | Tertiary referral hospital | USA      | L-arginine 3.5g PO QDS or 10g IV TDS for 3-9 days       | Placebo                                   | MAP                                           | Maternal side effects<br>SBP, DBP<br>AHT requirement<br>Laboratory values (glomerular filtration rate (GFR) (inulin clearance), Albumin/creatinine (A/C) ratio, vasoactive hormones (NO and cGMP), liver function tests (LFTs), plt)<br>Renal plasma flow (para-amino hippurate clearance), renal blood flow = renal plasma flow / (1 - HCT), renovascular resistance |  |
| Liu 2009 <sup>52</sup>               | Quasi-randomised trial     | Enrolled day 2 after birth F/U 3 weeks                          | 72           | 26.6±3.7<br>25.7±3.9             | District general hospital  | China†   | Shengkangbao 10g PO or IV BD for 3 weeks                | No intervention                           | Percentage of cases with positive albuminuria | SBP, DBP<br>Laboratory values (24h urinary albumin, plasma total protein, plasma albumin, urinary albumin negative inversion rate, renal function)                                                                                                                                                                                                                    |  |
| <b>Steroids</b>                      |                            |                                                                 |              |                                  |                            |          |                                                         |                                           |                                               |                                                                                                                                                                                                                                                                                                                                                                       |  |
| Barrilleaux 2005 <sup>53,54</sup>    | RCT                        | Enrolled immediately after birth F/U 4.5 days                   | 157 (175)    | 24.5±6.8<br>23.9±6.4             | Tertiary referral hospital | USA      | Dexamethasone 10mg x 2, then 5mg x 2 IV BD for 48 hours | Placebo                                   | Antihypertensive medication requirement       | MAP<br>Critical care admission<br>Length of PN hospital stay<br>Urine output<br>Laboratory values (plt, lactate dehydrogenase (LDH), aspartate aminotransferase (AST))<br>Stay in recovery >24h                                                                                                                                                                       |  |
| <b>Atrial natriuretic peptide</b>    |                            |                                                                 |              |                                  |                            |          |                                                         |                                           |                                               |                                                                                                                                                                                                                                                                                                                                                                       |  |
| Shigemitsu 2015 <sup>47</sup>        | Retrospective cohort study | F/U not specified                                               | 16           | Not specified                    | Tertiary referral hospital | Japan    | Carperitide (no further details)                        | Standard care                             | MAP                                           | Maternal mortality<br>Maternal side effects<br>Need for dialysis<br>Time to diuresis                                                                                                                                                                                                                                                                                  |  |
| <b>UTERINE CURETTAGE (8 studies)</b> |                            |                                                                 |              |                                  |                            |          |                                                         |                                           |                                               |                                                                                                                                                                                                                                                                                                                                                                       |  |
| Salvatore 1967 <sup>58</sup>         | Prospective cohort study   | Enrolled immediately after birth F/U 10 days                    | 48           | 16-45                            | Tertiary referral hospital | Brazil†† | Uterine curettage                                       | No intervention                           | SBP + DBP                                     | Maternal morbidity (development of pre-eclampsia with severe features – seizures)                                                                                                                                                                                                                                                                                     |  |
| Magann 1993 <sup>59</sup>            | RCT                        | Enrolled immediately after birth F/U 24h (telephone at 7 weeks) | 32           | 22.9±5.6<br>23.4±6.6             | Tertiary referral hospital | USA      | Uterine curettage                                       | No intervention                           | MAP                                           | Maternal side effects<br>Length of PN hospital stay<br>AHT requirement<br>Urine output<br>Laboratory values (HCT, plt, AST, LDH)                                                                                                                                                                                                                                      |  |
| Magann 1994 <sup>60</sup>            | RCT                        | Enrolled immediately after birth F/U 48h (telephone at 7 weeks) | 45           | 22.3±6.4<br>22.8±6.6<br>22.8±6.1 | Tertiary referral hospital | USA      | Uterine curettage                                       | (1) Nifedipine PO<br>OR<br>(2) Usual care | MAP                                           | Maternal side effects<br>Urine output<br>Laboratory values (HCT, plt, AST, LDH)                                                                                                                                                                                                                                                                                       |  |

| Author and year                         | Methods                    |                                                    | Participants    |                      |                            |         | Intervention                                                                                                                                                                  |                 |                                                           | Outcomes                                                                                                                                                                              |  |
|-----------------------------------------|----------------------------|----------------------------------------------------|-----------------|----------------------|----------------------------|---------|-------------------------------------------------------------------------------------------------------------------------------------------------------------------------------|-----------------|-----------------------------------------------------------|---------------------------------------------------------------------------------------------------------------------------------------------------------------------------------------|--|
|                                         | Study design               | Duration                                           | n*              | Age /y†              | Setting                    | Country | Intervention                                                                                                                                                                  | Control(s)      | Primary                                                   | Secondary                                                                                                                                                                             |  |
| Gocmen 1996 <sup>57</sup>               | Prospective cohort study   | Enrolled immediately after birth F/U 24h           | 50              | Not specified        | Tertiary referral hospital | Turkey† | Uterine curettage                                                                                                                                                             | No intervention | MAP                                                       | Urine output<br>Laboratory values (plt)                                                                                                                                               |  |
| Gomez 2005 <sup>61</sup>                | RCT                        | Enrolled immediately after birth F/U not specified | 86              | Not specified        | Tertiary referral hospital | Peru    | Uterine curettage                                                                                                                                                             | No intervention | MAP                                                       | Maternal side effects<br>Length of PN hospital stay<br>AHT requirement<br>Urine output                                                                                                |  |
| Alkan 2006 <sup>62</sup>                | RCT                        | Enrolled immediately after birth F/U 24h           | 56              | 22.8±3.4<br>24.6±7.5 | Tertiary referral hospital | Turkey  | Uterine curettage                                                                                                                                                             | No intervention | MAP                                                       | Maternal side effects<br>Urine output<br>Laboratory values (plt, LDH, AST, ALT)                                                                                                       |  |
| Ragab 2013 <sup>15</sup>                | RCT                        | Enrolled immediately after birth F/U 96h           | 420             | Not specified        | Tertiary referral hospital | Egypt   | Uterine curettage                                                                                                                                                             | No intervention | MAP                                                       | Maternal mortality<br>Maternal morbidity (development of pre-eclampsia with severe features)<br>MAP (time to MAP ≤105mmHg)<br>Urine output<br>Laboratory values (creatinine, plt, UA) |  |
| Mallapur 2015 <sup>18</sup>             | RCT                        | Enrolled immediately after birth F/U 7 days        | 100             | Not specified        | Tertiary referral hospital | India   | Uterine curettage                                                                                                                                                             | No intervention | MAP                                                       | Length of PN hospital stay<br>Urine output<br>Laboratory values (plt, renal and liver function)                                                                                       |  |
| <b>ORGANISATION OF CARE (2 studies)</b> |                            |                                                    |                 |                      |                            |         |                                                                                                                                                                               |                 |                                                           |                                                                                                                                                                                       |  |
| York 1997 <sup>26</sup>                 | RCT                        | Enrolled immediately after birth F/U 8 weeks       | 96 <sup>§</sup> | 28±7<br>27±7         | Tertiary referral          | USA     | Contact with nurse specialist; early discharge if criteria met; 2 scheduled home visits and 10 telephone calls (twice weekly for 2 weeks, then weekly for 6 weeks) during F/U | Standard care   | Postnatal readmission to secondary care                   | Functional status<br>Patient satisfaction<br>Neonatal rehospitalisation / acute neonatal care<br>Cost                                                                                 |  |
| Bibbo 2014 <sup>33</sup>                | Retrospective cohort study | F/U not specified (but >7 days)                    | 138             | Not specified        | Tertiary referral hospital | USA     | Specialised postpartum clinic                                                                                                                                                 | Usual care      | Postnatal readmission to secondary care and triage visits | Primary care provider F/U                                                                                                                                                             |  |

§ Mixture of hypertension and diabetes – unable to separate

**APPENDIX S5: Summary of main results for included studies (n=39)****ANTIHYPERTENSIVE MEDICATIONS (18 studies)****Calcium channel blockers****BARTON 1990<sup>32</sup>****Population:** Postnatal women with severe pre-eclampsia**Setting:** Tertiary referral centres, USA**Intervention:** Nifedipine 10mg PO 4-hourly for 48 hours**Comparison:** Placebo

| Primary outcome               | Treatment effect                                                                              | Number of participants                                                    | Quality of the evidence                    |
|-------------------------------|-----------------------------------------------------------------------------------------------|---------------------------------------------------------------------------|--------------------------------------------|
| MAP (18-24 hours after birth) | Nifedipine group 93.9±1.6mmHg, placebo group 100.2±2.6mmHg. Difference -6.3mmHg ( $p<0.05$ ). | 31 (16 intervention, 15 control); follow-up complete for all participants | Double-blind RCT; overall low risk of bias |

**VERMILLION 1999<sup>21</sup>****Population:** Antenatal and postnatal women with severe pre-eclampsia or super-imposed pre-eclampsia**Setting:** Tertiary referral centres (USA)**Intervention:** Nifedipine 10mg stat PO then 20mg every 20 minutes until BP <160/110mmHg or max 5 doses (90mg) + IV placebo**Comparison:** Labetalol 20mg, then 40mg, then 80mg IV every 20 minutes until BP <160/110mmHg or max 5 doses (300mg) + PO placebo

| Primary outcome                         | Treatment effect                                                                                               | Number of participants                                                                  | Quality of the evidence                                                                                                                              |
|-----------------------------------------|----------------------------------------------------------------------------------------------------------------|-----------------------------------------------------------------------------------------|------------------------------------------------------------------------------------------------------------------------------------------------------|
| SBP + DBP (time to target <160/100mmHg) | Nifedipine group 25.1±13.6 minutes, labetalol group 43.6±25.4 minutes. Difference -18.5 minutes ( $p=0.002$ ). | 50 (21 postnatal: 10 intervention, 11 control); follow-up complete for all participants | Double-blind RCT; overall high risk of bias (other bias); small number of postnatal women (42%) (n<30); unable to obtain data for postnatal subgroup |

**SAYIN 2005<sup>34</sup>****Population:** Postnatal women with pre-eclampsia, severe pre-eclampsia, superimposed pre-eclampsia or eclampsia**Setting:** Tertiary referral centres (Turkey)**Intervention:** Nifedipine 10mg PO 6-hourly until BP <150/100mmHg for 48 hours**Comparison:** Methyldopa 250mg PO 8-hourly

| Primary outcome                         | Treatment effect                                                                         | Number of participants                                                    | Quality of the evidence                                      |
|-----------------------------------------|------------------------------------------------------------------------------------------|---------------------------------------------------------------------------|--------------------------------------------------------------|
| SBP + DBP (time to target <150/100mmHg) | Nifedipine group 6.7±2.5 days; methyldopa group 8.6±5.5 days. Difference -1.9 days (NS). | 83 (42 intervention, 41 control); follow-up complete for all participants | Open-label RCT; overall high risk of bias (multiple domains) |

**Vasodilators****PALOT 1979<sup>36</sup>****Population:** Postnatal women with 'arterial hypertensions of labour and the postpartum period'**Setting:** Not specified (France)**Intervention:** Hydralazine 5mg IV stat then 1% IV infusion, furosemide 20mg IV stat and 30% hypertonic glucose**Comparison:** Clonidine IV and furosemide 20mg IV stat

| Primary outcome                                                        | Treatment effect                                                                                                        | Number of participants                                                                                 | Quality of the evidence                                                                        |
|------------------------------------------------------------------------|-------------------------------------------------------------------------------------------------------------------------|--------------------------------------------------------------------------------------------------------|------------------------------------------------------------------------------------------------|
| Maternal morbidity (development of pre-eclampsia with severe features) | Hydralazine group: no women developed eclampsia, clonidine group: 2 women developed eclampsia. No statistical analysis. | 54 (11 intervention, 24 control, 19 non-systematic treatment); completeness of follow-up not specified | Retrospective cohort study; overall high risk of bias (comparability); no statistical analysis |

**GRIFFIS 1989<sup>38, 39</sup>****Population:** Postnatal women with pre-eclampsia**Setting:** Tertiary referral centres (USA)**Intervention:** Hydralazine 20mg IM 6-hourly for 24h**Comparison:** Methyldopa 250mg IV 6-hourly for 24h

| Primary outcome              | Treatment effect                                                                                                                                                                           | Number of participants                                                    | Quality of the evidence                                                               |
|------------------------------|--------------------------------------------------------------------------------------------------------------------------------------------------------------------------------------------|---------------------------------------------------------------------------|---------------------------------------------------------------------------------------|
| MAP (mean at 6 and 12 hours) | 6 hours: hydralazine group 104.5mmHg, methyldopa group 112mmHg. Difference -7.5mmHg ( $p=0.0057$ ). 12 hours: hydralazine group 100mmHg, methyldopa group 108mmHg. Difference -8mmHg (NS). | 26 (12 intervention, 14 control); follow-up complete for all participants | Open-label RC; overall high risk of bias (multiple domains); small sample size (n<30) |

**WALSS RODRIGUEZ 1991<sup>40</sup>****Population:** Postnatal women with severe pre-eclampsia**Setting:** Not specified (Mexico)**Intervention:** Hydralazine 40mg PO 6-hourly, duration not specified + if DBP >110mmHg PRN nifedipine 10mg sublingual every 30 minutes, to maximum of 3 doses (30mg)**Comparison:** Nifedipine 10mg sublingual every 30 minutes if DBP ≥110mmHg

| Primary outcome                                                                                                                                                                                                                                                                                                                                                                                                                                                                                              | Treatment effect                                                                                                                                                                                                                                                                                                                                                                                                                                                                                                                                                                                 | Number of participants                                                                                                                  | Quality of the evidence                                                                                                                                                                               |
|--------------------------------------------------------------------------------------------------------------------------------------------------------------------------------------------------------------------------------------------------------------------------------------------------------------------------------------------------------------------------------------------------------------------------------------------------------------------------------------------------------------|--------------------------------------------------------------------------------------------------------------------------------------------------------------------------------------------------------------------------------------------------------------------------------------------------------------------------------------------------------------------------------------------------------------------------------------------------------------------------------------------------------------------------------------------------------------------------------------------------|-----------------------------------------------------------------------------------------------------------------------------------------|-------------------------------------------------------------------------------------------------------------------------------------------------------------------------------------------------------|
| 1<br>2<br>3<br>4<br>5<br>6<br>7<br>8<br>9<br>10<br>11<br>12<br>13<br>14<br>15<br>16<br>17<br>18<br>19<br>20<br>21<br>22<br>23<br>24<br>25<br>26<br>27<br>28<br>29<br>30<br>31<br>32<br>33<br>34<br>35<br>36<br>37<br>38<br>39<br>40<br>41<br>42<br>43<br>44<br>45<br>46<br>47                                                                                                                                                                                                                                | <p><b>Primary outcome</b><br/>SBP (mean)</p> <p><b>Treatment effect</b><br/>Hydralazine group 143.6mmHg, nifedipine group 138.0mmHg. Difference 5.6mmHg (NS).</p> <p><b>BEGUM 2002<sup>17</sup></b><br/><b>Population:</b> Antenatal and postnatal women with eclampsia<br/><b>Setting:</b> Tertiary referral centres (Bangladesh)<br/><b>Intervention:</b> Hydralazine 5mg then 2mg IV bolus every 15 minutes until DBP 90-95mmHg<br/><b>Comparison:</b> Hydralazine 20mg /200ml normal saline IV infusion; 10 drops per min, increased by 5 drops at 15 min intervals; until DBP 90-95mmHg</p> | <p><b>Number of participants</b><br/>38 (18 intervention, 20 control); completeness of follow-up not specified</p>                      | <p><b>Quality of the evidence</b><br/>Open-label RCT; overall high risk of bias (multiple domains)</p>                                                                                                |
| <p><b>Primary outcome</b><br/>DBP (time to target 90-95mmHg)</p>                                                                                                                                                                                                                                                                                                                                                                                                                                             | <p><b>Treatment effect</b><br/>Bolus hydralazine group 65.23±23.38 minutes, hydralazine infusion group 186.36±79.77 minutes. Difference -121.13 minutes (<math>p&lt;0.001</math>).</p>                                                                                                                                                                                                                                                                                                                                                                                                           | <p><b>Number of participants</b><br/>77 (15 postnatal: 9 intervention, 6 control); completeness of follow-up not specified</p>          | <p><b>Quality of the evidence</b><br/>Open-label RCT; overall high risk of bias (multiple domains); small number of postnatal women (19%) (n&lt;30): unable to obtain data for postnatal subgroup</p> |
| <p><b>VIGIL DE GRACIA 2007<sup>35</sup></b><br/><b>Population:</b> Postnatal women with severe gestational hypertension, severe pre-eclampsia or super-imposed pre-eclampsia<br/><b>Setting:</b> Tertiary referral centres (Panama)<br/><b>Intervention:</b> Hydralazine 5mg IV every 20 minutes until BP &lt;160/110mmHg or maximum 5 doses<br/><b>Comparison:</b> Labetalol 20mg, then 40mg, then 80mg IV every 20 minutes until BP &lt;160/110mmHg or maximum 5 doses (300mg)</p>                         | <p><b>Treatment effect</b><br/>Hydralazine group 0/42, labetalol group 1/40 (NS).</p>                                                                                                                                                                                                                                                                                                                                                                                                                                                                                                            | <p><b>Number of participants</b><br/>82 (42 intervention, 40 control); follow-up complete for all participants</p>                      | <p><b>Quality of the evidence</b><br/>Open-label RCT; overall high risk of bias (multiple domains)</p>                                                                                                |
| <p><b>HENNESSY 2007<sup>23</sup></b><br/><b>Population:</b> Antenatal and postnatal women with pre-eclampsia, superimposed pre-eclampsia or essential hypertension<br/><b>Setting:</b> Tertiary referral (Australia)<br/><b>Intervention:</b> Diazoxide 15mg IV every 3 minutes, until target BP (140/90mmHg) reached or maximum cumulative dose 300mg<br/><b>Comparison:</b> Hydralazine 5mg IV every 20 minutes, until target BP (140/90mmHg) reached or maximum cumulative dose 15mg</p>                  | <p><b>Treatment effect</b><br/>Diazoxide group 67%, hydralazine group 43% (<math>p&lt;0.01</math>).<br/>RR 0.637 (95% CI 0.46 to 0.89) for not reaching target BP with intervention.</p>                                                                                                                                                                                                                                                                                                                                                                                                         | <p><b>Number of participants</b><br/>124 total (37 postnatal: 11 intervention, 16 control); follow-up complete for all participants</p> | <p><b>Quality of the evidence</b><br/>Open-label RCT; overall high risk of bias (multiple domains); small proportion of postnatal women (30%): unable to obtain data for postnatal subgroup</p>       |
| <b>Beta-blockers</b>                                                                                                                                                                                                                                                                                                                                                                                                                                                                                         |                                                                                                                                                                                                                                                                                                                                                                                                                                                                                                                                                                                                  |                                                                                                                                         |                                                                                                                                                                                                       |
| <p><b>GARDEN 1982<sup>24</sup></b><br/><b>Population:</b> Antenatal and postnatal women with severe pre-eclampsia or eclampsia<br/><b>Setting:</b> Tertiary referral (South Africa)<br/><b>Intervention:</b> Labetalol 200mg/200ml 5% dextrose, 20mg/h IV infusion, doubled every 30 minutes until DBP &lt;100mmHg or maximum dose 160mg/hour<br/><b>Comparison:</b> Dihydralazine 100mg/200ml 5% dextrose, 10mg/h IV infusion, doubled every 30 minutes until DBP &lt;100mmHg or maximum dose 80mg/hour</p> | <p><b>Treatment effect</b><br/>Labetalol group 5/6, dihydralazine group 2/6. No statistical analysis.</p>                                                                                                                                                                                                                                                                                                                                                                                                                                                                                        | <p><b>Number of participants</b><br/>12 total (6 postnatal: 3 intervention, 3 control); follow-up complete for all participants</p>     | <p><b>Quality of the evidence</b><br/>RCT (blinding not specified); overall high risk of bias (other bias); very small sample size (n&lt;15): unable to obtain data for postnatal subgroup</p>        |
| <p><b>FIDLER 1982<sup>42</sup></b><br/><b>Population:</b> Postnatal women with gestational hypertension<br/><b>Setting:</b> Tertiary referral (UK)<br/><b>Intervention:</b> Timolol 5mg PO 8-hourly for 9 days<br/><b>Comparison:</b> Methyldopa 250mg PO 8-hourly for 9 days</p>                                                                                                                                                                                                                            | <p><b>Treatment effect</b><br/>Timolol group 88.7mmHg, methyldopa group 93.8mmHg. Difference -5.1mmHg (<math>p&lt;0.05</math>).</p>                                                                                                                                                                                                                                                                                                                                                                                                                                                              | <p><b>Number of participants</b><br/>80 (40 intervention, 40 control); follow-up complete in 79/80 (99%)</p>                            | <p><b>Quality of the evidence</b><br/>RCT (blinding not specified); overall high risk of bias (multiple domains)</p>                                                                                  |
| <p><b>MABIE 1987<sup>22</sup></b><br/><b>Population:</b> Antenatal and postnatal women with pre-eclampsia, superimposed pre-eclampsia, eclampsia or essential hypertension<br/><b>Setting:</b> Tertiary referral (USA)<br/><b>Intervention:</b> Labetalol 20mg IV every 10 minutes then escalating until DBP &lt;100mmHg or maximum cumulative dose reached (300mg)<br/><b>Comparison:</b> Hydralazine 5mg IV every 10 minutes until DBP &lt;100mmHg</p>                                                     |                                                                                                                                                                                                                                                                                                                                                                                                                                                                                                                                                                                                  |                                                                                                                                         |                                                                                                                                                                                                       |

|    |                                                                                                                         |                                                                                                                                  |                                                                                                                          |                                                                                                                                                                                                                 |
|----|-------------------------------------------------------------------------------------------------------------------------|----------------------------------------------------------------------------------------------------------------------------------|--------------------------------------------------------------------------------------------------------------------------|-----------------------------------------------------------------------------------------------------------------------------------------------------------------------------------------------------------------|
| 1  | <b>Primary outcome</b><br>MAP (mean maximal decrease)                                                                   | <b>Treatment effect</b><br>Labetalol group 25.5±11.2mmHg, hydralazine group 33.3±13.2mmHg. Difference -7.8mmHg ( $p=0.02$ ).     | <b>Number of participants</b><br>60 (41 postnatal: 27 intervention, 14 control); follow-up complete for all participants | <b>Quality of the evidence</b><br>Open-label RCT; overall high risk of bias (multiple domains)                                                                                                                  |
| 2  |                                                                                                                         |                                                                                                                                  |                                                                                                                          |                                                                                                                                                                                                                 |
| 3  | <b>SHUMARD 2016<sup>41</sup></b>                                                                                        |                                                                                                                                  |                                                                                                                          |                                                                                                                                                                                                                 |
| 4  | <b>Population:</b> Postnatal women with gestational hypertension or pre-eclampsia                                       |                                                                                                                                  |                                                                                                                          |                                                                                                                                                                                                                 |
| 5  | <b>Setting:</b> Not specified (USA)                                                                                     |                                                                                                                                  |                                                                                                                          |                                                                                                                                                                                                                 |
| 6  | <b>Intervention:</b> Labetalol PO (variable dose and frequency)                                                         |                                                                                                                                  |                                                                                                                          |                                                                                                                                                                                                                 |
| 7  | <b>Comparison:</b> Nifedipine PO (variable dose and frequency)                                                          |                                                                                                                                  |                                                                                                                          |                                                                                                                                                                                                                 |
| 8  | <b>Primary outcome</b><br>Length of hospital stay after delivery                                                        | <b>Treatment effect</b><br>Labetalol group 3.5 days, nifedipine group 3.6 days. Difference -0.1 days (NS).                       | <b>Number of participants</b><br>128 (42 intervention, 86 control); follow-up complete for all participants              | <b>Quality of the evidence</b><br>Retrospective cohort study; overall high risk of bias (comparability); conference abstract only, authors did not provide further data                                         |
| 9  |                                                                                                                         |                                                                                                                                  |                                                                                                                          |                                                                                                                                                                                                                 |
| 10 | <b>SHARMA 2017<sup>27 28</sup></b>                                                                                      |                                                                                                                                  |                                                                                                                          |                                                                                                                                                                                                                 |
| 11 | <b>Population:</b> Postnatal women with gestational hypertension or pre-eclampsia                                       |                                                                                                                                  |                                                                                                                          |                                                                                                                                                                                                                 |
| 12 | <b>Setting:</b> Tertiary referral (USA)                                                                                 |                                                                                                                                  |                                                                                                                          |                                                                                                                                                                                                                 |
| 13 | <b>Intervention:</b> Labetalol 200mg PO 12-hourly                                                                       |                                                                                                                                  |                                                                                                                          |                                                                                                                                                                                                                 |
| 14 | <b>Comparison:</b> Nifedipine XL 30mg PO once daily                                                                     |                                                                                                                                  |                                                                                                                          |                                                                                                                                                                                                                 |
| 15 | <b>Primary outcome</b><br>SBP + DBP (time to sustained BP control: absence of severe hypertension for $\geq 12$ hours)  | <b>Treatment effect</b><br>Labetalol group 37.6 hours, nifedipine group 38.2 hours. Difference -0.6 hours (NS).                  | <b>Number of participants</b><br>50 (25 intervention, 25 control); follow-up complete for all participants               | <b>Quality of the evidence</b><br>Open-label RCT; overall high risk of bias (multiple domains)                                                                                                                  |
| 16 |                                                                                                                         |                                                                                                                                  |                                                                                                                          |                                                                                                                                                                                                                 |
| 17 | <b>Other antihypertensive medications</b>                                                                               |                                                                                                                                  |                                                                                                                          |                                                                                                                                                                                                                 |
| 18 | <b>GAISIN 2013<sup>25</sup></b>                                                                                         |                                                                                                                                  |                                                                                                                          |                                                                                                                                                                                                                 |
| 19 | <b>Population:</b> Postnatal women with pre-eclampsia, super-imposed pre-eclampsia or essential hypertension            |                                                                                                                                  |                                                                                                                          |                                                                                                                                                                                                                 |
| 20 | <b>Setting:</b> Not specified (Russia)                                                                                  |                                                                                                                                  |                                                                                                                          |                                                                                                                                                                                                                 |
| 21 | <b>Intervention:</b> Indapamide 1.5mg PO OD, duration unclear                                                           |                                                                                                                                  |                                                                                                                          |                                                                                                                                                                                                                 |
| 22 | <b>Comparison:</b> Adjusted dose methyldopa                                                                             |                                                                                                                                  |                                                                                                                          |                                                                                                                                                                                                                 |
| 23 | <b>Primary outcome</b><br>SBP + DBP                                                                                     | <b>Treatment effect</b><br>Indapamide group 113±6/74±4mmHg, methyldopa group 116±5/75±4mmHg. Difference -3/+1mmHg (NS).          | <b>Number of participants</b><br>30 (15 intervention, 15 control); completeness of follow-up not specified               | <b>Quality of the evidence</b><br>Open-label RCT; overall high risk of bias (multiple domains); conference abstract only, authors did not provide further data                                                  |
| 24 |                                                                                                                         |                                                                                                                                  |                                                                                                                          |                                                                                                                                                                                                                 |
| 25 | <b>GAISIN 2014<sup>37</sup></b>                                                                                         |                                                                                                                                  |                                                                                                                          |                                                                                                                                                                                                                 |
| 26 | <b>Population:</b> Postnatal women with pre-eclampsia                                                                   |                                                                                                                                  |                                                                                                                          |                                                                                                                                                                                                                 |
| 27 | <b>Setting:</b> Not specified (Russia)                                                                                  |                                                                                                                                  |                                                                                                                          |                                                                                                                                                                                                                 |
| 28 | <b>Intervention:</b> Indapamide 1.5mg PO once daily + ursodeoxycholic acid 250mg PO three times daily, duration unclear |                                                                                                                                  |                                                                                                                          |                                                                                                                                                                                                                 |
| 29 | <b>Comparison:</b> Adjusted dose methyldopa                                                                             |                                                                                                                                  |                                                                                                                          |                                                                                                                                                                                                                 |
| 30 | <b>Primary outcome</b><br>SBP + DBP                                                                                     | <b>Treatment effect</b><br>Indapamide group 122±6/75±4 mmHg, methyldopa group 126±6/78±5mmHg. Difference -4/-3mmHg (NS).         | <b>Number of participants</b><br>30 (allocation not described); completeness of follow-up not specified                  | <b>Quality of the evidence</b><br>Open-label RCT; overall high risk of bias (multiple domains); conference abstract only, authors did not provide further data; number of participants in each group not stated |
| 31 |                                                                                                                         |                                                                                                                                  |                                                                                                                          |                                                                                                                                                                                                                 |
| 32 | <b>KREBS 1956<sup>43 44</sup></b>                                                                                       |                                                                                                                                  |                                                                                                                          |                                                                                                                                                                                                                 |
| 33 | <b>Population:</b> Postnatal women with gestational hypertension, pre-eclampsia, severe pre-eclampsia or eclampsia      |                                                                                                                                  |                                                                                                                          |                                                                                                                                                                                                                 |
| 34 | <b>Setting:</b> Not specified (Germany)                                                                                 |                                                                                                                                  |                                                                                                                          |                                                                                                                                                                                                                 |
| 35 | <b>Intervention:</b> Reserpine 0.25mg PO or intramuscular 6-8 hourly for 7 days                                         |                                                                                                                                  |                                                                                                                          |                                                                                                                                                                                                                 |
| 36 | <b>Comparison:</b> Phenobarbital                                                                                        |                                                                                                                                  |                                                                                                                          |                                                                                                                                                                                                                 |
| 37 | <b>Primary outcome</b><br>SBP + DBP (maximal reduction)                                                                 | <b>Treatment effect</b><br>Reserpine halved time to maximal BP reduction (no further details reported). No statistical analysis. | <b>Number of participants</b><br>140 (70 intervention, 70 control); completeness of follow-up not specified              | <b>Quality of the evidence</b><br>Retrospective cohort study; overall high risk of bias (selection and outcome assessment); no statistical analysis                                                             |
| 38 |                                                                                                                         |                                                                                                                                  |                                                                                                                          |                                                                                                                                                                                                                 |
| 39 | <b>NORONHA NETO 2016<sup>29-31</sup></b>                                                                                |                                                                                                                                  |                                                                                                                          |                                                                                                                                                                                                                 |
| 40 | <b>Population:</b> Postnatal women with severe HDP                                                                      |                                                                                                                                  |                                                                                                                          |                                                                                                                                                                                                                 |
| 41 | <b>Setting:</b> Tertiary referral (Brazil)                                                                              |                                                                                                                                  |                                                                                                                          |                                                                                                                                                                                                                 |
| 42 | <b>Intervention:</b> Clonidine 0.1mg PO repeated every 20 minutes to max 6 doses                                        |                                                                                                                                  |                                                                                                                          |                                                                                                                                                                                                                 |
| 43 | <b>Comparison:</b> Captopril 25mg PO repeated every 20 minutes to max 6 doses                                           |                                                                                                                                  |                                                                                                                          |                                                                                                                                                                                                                 |
| 44 |                                                                                                                         |                                                                                                                                  |                                                                                                                          |                                                                                                                                                                                                                 |



| Primary outcome                                                                                           | Treatment effect                                                                                                                                                                                               | Number of participants                                                        | Quality of the evidence                                                                                                                                                       |
|-----------------------------------------------------------------------------------------------------------|----------------------------------------------------------------------------------------------------------------------------------------------------------------------------------------------------------------|-------------------------------------------------------------------------------|-------------------------------------------------------------------------------------------------------------------------------------------------------------------------------|
| SBP + DBP (episodes SBP $\geq$ 180mmHg and/or DBP $\geq$ 110mmHg)                                         | Clonidine group 2.1 $\pm$ 2.1 episodes, captopril group 3.5 $\pm$ 4.7 episodes. Difference -1.4 episodes (NS).                                                                                                 | 90 (45 intervention, 45 control); completeness of follow-up not specified     | Double-blind RCT; overall low risk of bias                                                                                                                                    |
| <b>DIURETICS (4 studies)</b>                                                                              |                                                                                                                                                                                                                |                                                                               |                                                                                                                                                                               |
| <b>MATTHEWS 1997<sup>46</sup></b>                                                                         |                                                                                                                                                                                                                |                                                                               |                                                                                                                                                                               |
| <b>Population:</b> Postnatal women with severe pre-eclampsia or eclampsia                                 |                                                                                                                                                                                                                |                                                                               |                                                                                                                                                                               |
| <b>Setting:</b> Tertiary referral centres (UK)                                                            |                                                                                                                                                                                                                |                                                                               |                                                                                                                                                                               |
| <b>Intervention:</b> Furosemide 40mg PO once daily for 7 days                                             |                                                                                                                                                                                                                |                                                                               |                                                                                                                                                                               |
| <b>Comparison:</b> Placebo                                                                                |                                                                                                                                                                                                                |                                                                               |                                                                                                                                                                               |
| Primary outcome                                                                                           | Treatment effect                                                                                                                                                                                               | Number of participants                                                        | Quality of the evidence                                                                                                                                                       |
| MAP (decrease)                                                                                            | Intervention group -10.6mmHg, control group -9.75mmHg. Difference -0.85mmHg (NS).                                                                                                                              | 19 (10 intervention, 9 control); follow-up complete in 18/19 (95%)            | Double-blind RCT; overall high risk of bias (other bias); small sample size (n<30)                                                                                            |
| <b>ASCARELLI 2005<sup>16</sup></b>                                                                        |                                                                                                                                                                                                                |                                                                               |                                                                                                                                                                               |
| <b>Population:</b> Postnatal women with pre-eclampsia, severe pre-eclampsia or superimposed pre-eclampsia |                                                                                                                                                                                                                |                                                                               |                                                                                                                                                                               |
| <b>Setting:</b> Tertiary referral centres (USA)                                                           |                                                                                                                                                                                                                |                                                                               |                                                                                                                                                                               |
| <b>Intervention:</b> Furosemide 20mg PO once daily + potassium 20mEq PO once daily for 5 days             |                                                                                                                                                                                                                |                                                                               |                                                                                                                                                                               |
| <b>Comparison:</b> No intervention                                                                        |                                                                                                                                                                                                                |                                                                               |                                                                                                                                                                               |
| Primary outcome                                                                                           | Treatment effect                                                                                                                                                                                               | Number of participants                                                        | Quality of the evidence                                                                                                                                                       |
| SBP                                                                                                       | No significant difference between groups (details not reported). Severe pre-eclampsia (n=70) day 2 SBP furosemide group 142 $\pm$ 13mmHg, usual care group 153 $\pm$ 19mmHg. Difference -11mmHg ( $p$ <0.004). | 264 (132 intervention, 132 control); completeness of follow-up not specified. | Open-label RCT; overall high risk of bias (multiple domains)                                                                                                                  |
| <b>AMORIM 2015<sup>45</sup></b>                                                                           |                                                                                                                                                                                                                |                                                                               |                                                                                                                                                                               |
| <b>Population:</b> Postnatal women with severe pre-eclampsia                                              |                                                                                                                                                                                                                |                                                                               |                                                                                                                                                                               |
| <b>Setting:</b> Tertiary referral (Brazil)                                                                |                                                                                                                                                                                                                |                                                                               |                                                                                                                                                                               |
| <b>Intervention:</b> Furosemide 40mg PO once daily for maximum 5 days                                     |                                                                                                                                                                                                                |                                                                               |                                                                                                                                                                               |
| <b>Comparison:</b> Placebo                                                                                |                                                                                                                                                                                                                |                                                                               |                                                                                                                                                                               |
| Primary outcome                                                                                           | Treatment effect                                                                                                                                                                                               | Number of participants                                                        | Quality of the evidence                                                                                                                                                       |
| SBP + DBP                                                                                                 | Furosemide group had significantly improved SBP + DBP. Magnitude of difference not reported ( $p$ <0.001).                                                                                                     | 120 (allocation not described); follow-up complete in 118/120 (98%).          | Double-blind RCT; overall high risk of bias (reporting bias); conference abstract only, authors did not provide further data; number of participants in each group not stated |
| <b>VEENA 2017<sup>19</sup></b>                                                                            |                                                                                                                                                                                                                |                                                                               |                                                                                                                                                                               |
| <b>Population:</b> Postnatal women with severe pre-eclampsia                                              |                                                                                                                                                                                                                |                                                                               |                                                                                                                                                                               |
| <b>Setting:</b> Tertiary referral centre (India)                                                          |                                                                                                                                                                                                                |                                                                               |                                                                                                                                                                               |
| <b>Intervention:</b> Furosemide 10mg PO once daily plus nifedipine 10mg PO three times daily for 3 days   |                                                                                                                                                                                                                |                                                                               |                                                                                                                                                                               |
| <b>Comparison:</b> Nifedipine 10mg PO three times daily for 3 days                                        |                                                                                                                                                                                                                |                                                                               |                                                                                                                                                                               |
| Primary outcome                                                                                           | Treatment effect                                                                                                                                                                                               | Number of participants                                                        | Quality of the evidence                                                                                                                                                       |
| SBP + DBP                                                                                                 | No significant difference between groups (absolute values and differences not reported, $p$ =0.457 for SBP and $p$ =0.642 for DBP).                                                                            | 100 (50 intervention, 50 control); follow-up complete in 98/100 (98%)         | Open-label RCT; overall high risk of bias (multiple domains)                                                                                                                  |
| <b>OTHER DRUGS (7 studies)</b>                                                                            |                                                                                                                                                                                                                |                                                                               |                                                                                                                                                                               |
| <b>Selective 5-HT antagonists</b>                                                                         |                                                                                                                                                                                                                |                                                                               |                                                                                                                                                                               |
| <b>WEINER 1982<sup>48</sup></b>                                                                           |                                                                                                                                                                                                                |                                                                               |                                                                                                                                                                               |
| <b>Population:</b> Postnatal women with severe pre-eclampsia                                              |                                                                                                                                                                                                                |                                                                               |                                                                                                                                                                               |
| <b>Setting:</b> Tertiary referral (USA)                                                                   |                                                                                                                                                                                                                |                                                                               |                                                                                                                                                                               |
| <b>Intervention:</b> R41468 IV (dose not specified) bolus then infusion for 90 minutes                    |                                                                                                                                                                                                                |                                                                               |                                                                                                                                                                               |
| <b>Comparison:</b> Placebo                                                                                |                                                                                                                                                                                                                |                                                                               |                                                                                                                                                                               |
| Primary outcome                                                                                           | Treatment effect                                                                                                                                                                                               | Number of participants                                                        | Quality of the evidence                                                                                                                                                       |
| MAP (mean maximal decline)                                                                                | SSRI group -31.6mmHg, placebo group -6.0mmHg. Difference -25.6mmHg ( $p$ <0.001).                                                                                                                              | 5 (crossover); follow-up complete in all participants                         | Double blind RCT (crossover); overall high risk of bias (other bias); conference abstract only, authors did not provide further data; very small sample size (n<15)           |

|                                                                                                                                                                                   |                                                                                                                                                                                                  |                                                                          |                                                                                                                                                                     |
|-----------------------------------------------------------------------------------------------------------------------------------------------------------------------------------|--------------------------------------------------------------------------------------------------------------------------------------------------------------------------------------------------|--------------------------------------------------------------------------|---------------------------------------------------------------------------------------------------------------------------------------------------------------------|
| <b>WEINER 1984<sup>49</sup></b>                                                                                                                                                   |                                                                                                                                                                                                  |                                                                          |                                                                                                                                                                     |
| <b>Population:</b> Postnatal women with pre-eclampsia and super-imposed pre-eclampsia                                                                                             |                                                                                                                                                                                                  |                                                                          |                                                                                                                                                                     |
| <b>Setting:</b> Tertiary referral (USA)                                                                                                                                           |                                                                                                                                                                                                  |                                                                          |                                                                                                                                                                     |
| <b>Intervention:</b> Ketanserin 10mg IV bolus then 4mg/hr IV infusion. Repeat bolus after 5 minutes if no response.                                                               |                                                                                                                                                                                                  |                                                                          |                                                                                                                                                                     |
| <b>Comparison:</b> Placebo                                                                                                                                                        |                                                                                                                                                                                                  |                                                                          |                                                                                                                                                                     |
| <b>Primary outcome</b>                                                                                                                                                            | <b>Treatment effect</b>                                                                                                                                                                          | <b>Number of participants</b>                                            | <b>Quality of the evidence</b>                                                                                                                                      |
| SBP + DBP (mean maximal decline)                                                                                                                                                  | SSRI group -41/-34mmHg, placebo group -7/-7mmHg. Difference -34/-27mmHg ( $p<0.001$ ).                                                                                                           | 20 (crossover); follow-up complete in all participants                   | Double blind RCT (crossover); overall high risk of bias (other bias); small sample size ( $n<30$ )                                                                  |
| <b>MONTENEGRO 1985<sup>50</sup></b>                                                                                                                                               |                                                                                                                                                                                                  |                                                                          |                                                                                                                                                                     |
| <b>Population:</b> Postnatal women with pre-eclampsia                                                                                                                             |                                                                                                                                                                                                  |                                                                          |                                                                                                                                                                     |
| <b>Setting:</b> Tertiary referral (USA)                                                                                                                                           |                                                                                                                                                                                                  |                                                                          |                                                                                                                                                                     |
| <b>Intervention:</b> Ketanserin 10mg IV bolus, repeated if no response. If no response to second bolus IV infusion 4mg/hr (increments of 2mg/hr every 10 minutes to max 12mg/hr). |                                                                                                                                                                                                  |                                                                          |                                                                                                                                                                     |
| <b>Comparison:</b> Placebo                                                                                                                                                        |                                                                                                                                                                                                  |                                                                          |                                                                                                                                                                     |
| <b>Primary outcome</b>                                                                                                                                                            | <b>Treatment effect</b>                                                                                                                                                                          | <b>Number of participants</b>                                            | <b>Quality of the evidence</b>                                                                                                                                      |
| MAP                                                                                                                                                                               | SSRI group had significantly improved MAP, over 30 minutes after drug administered. $F = 9.66$ ( $p<0.01$ )                                                                                      | 30 (crossover); follow-up complete in 23/30 (77%)                        | Double blind RCT (crossover); overall high risk of bias (multiple domains)                                                                                          |
| <b>Alternative therapies</b>                                                                                                                                                      |                                                                                                                                                                                                  |                                                                          |                                                                                                                                                                     |
| <b>HLADUNEWICH 2006<sup>51</sup></b>                                                                                                                                              |                                                                                                                                                                                                  |                                                                          |                                                                                                                                                                     |
| <b>Population:</b> Postnatal women with pre-eclampsia                                                                                                                             |                                                                                                                                                                                                  |                                                                          |                                                                                                                                                                     |
| <b>Setting:</b> Tertiary referral (USA)                                                                                                                                           |                                                                                                                                                                                                  |                                                                          |                                                                                                                                                                     |
| <b>Intervention:</b> L-arginine 3.5g PO four times daily OR L-arginine 10g IV three times daily (if unable to take PO) for 3-9 days postpartum                                    |                                                                                                                                                                                                  |                                                                          |                                                                                                                                                                     |
| <b>Comparison:</b> Placebo                                                                                                                                                        |                                                                                                                                                                                                  |                                                                          |                                                                                                                                                                     |
| <b>Primary outcome</b>                                                                                                                                                            | <b>Treatment effect</b>                                                                                                                                                                          | <b>Number of participants</b>                                            | <b>Quality of the evidence</b>                                                                                                                                      |
| MAP                                                                                                                                                                               | Day 3: L-arginine group $102\pm 12$ mmHg, placebo group $103\pm 12$ mmHg. Difference -1mmHg (NS). Day 10: L-arginine group $98\pm 14$ mmHg, placebo group $96\pm 1$ mmHg. Difference 2mmHg (NS). | 45 (22 intervention, 23 control); follow-up complete in 39/45 (87%)      | Double blind RCT; overall high risk of bias (multiple domains)                                                                                                      |
| <b>LIU 2009<sup>52</sup></b>                                                                                                                                                      |                                                                                                                                                                                                  |                                                                          |                                                                                                                                                                     |
| <b>Population:</b> Postnatal women with severe pre-eclampsia                                                                                                                      |                                                                                                                                                                                                  |                                                                          |                                                                                                                                                                     |
| <b>Setting:</b> District general (China)                                                                                                                                          |                                                                                                                                                                                                  |                                                                          |                                                                                                                                                                     |
| <b>Intervention:</b> Shengkangbao 10g PO or IV twice daily for 3 weeks                                                                                                            |                                                                                                                                                                                                  |                                                                          |                                                                                                                                                                     |
| <b>Comparison:</b> No intervention                                                                                                                                                |                                                                                                                                                                                                  |                                                                          |                                                                                                                                                                     |
| <b>Primary outcome</b>                                                                                                                                                            | <b>Treatment effect</b>                                                                                                                                                                          | <b>Number of participants</b>                                            | <b>Quality of the evidence</b>                                                                                                                                      |
| Percentage of cases with positive albuminuria                                                                                                                                     | 3 weeks: shengkangbao group $0.7\pm 0.8\%$ positive albuminuria, usual care group $1.5\pm 0.9\%$ . Difference $-0.8\%$ ( $p<0.01$ ).                                                             | 77 (allocation not described); follow-up complete in 72/77 (94%)         | Open-label quasi-randomised study; overall high risk of bias (multiple domains)                                                                                     |
| <b>Steroids</b>                                                                                                                                                                   |                                                                                                                                                                                                  |                                                                          |                                                                                                                                                                     |
| <b>BARRILLEAUX 2005<sup>53,54</sup></b>                                                                                                                                           |                                                                                                                                                                                                  |                                                                          |                                                                                                                                                                     |
| <b>Population:</b> Postnatal women with severe pre-eclampsia and eclampsia                                                                                                        |                                                                                                                                                                                                  |                                                                          |                                                                                                                                                                     |
| <b>Setting:</b> Tertiary referral (USA)                                                                                                                                           |                                                                                                                                                                                                  |                                                                          |                                                                                                                                                                     |
| <b>Intervention:</b> Dexamethasone 10mg x2, then 5mg x 2 IV 12-hourly for 48 hours                                                                                                |                                                                                                                                                                                                  |                                                                          |                                                                                                                                                                     |
| <b>Comparison:</b> Placebo (IV saline)                                                                                                                                            |                                                                                                                                                                                                  |                                                                          |                                                                                                                                                                     |
| <b>Primary outcome</b>                                                                                                                                                            | <b>Treatment effect</b>                                                                                                                                                                          | <b>Number of participants</b>                                            | <b>Quality of the evidence</b>                                                                                                                                      |
| Antihypertensive medication requirement                                                                                                                                           | Dexamethasone group 38/77 (49%), placebo group 31/80 (39%) required antihypertensive treatment in the first 48h PN. Difference 10% (NS).                                                         | 157 (77 intervention, 80 control); follow-up complete in 155/157 (99%)   | Double blind RCT; overall high risk of bias (reporting bias)                                                                                                        |
| <b>Atrial natriuretic peptide</b>                                                                                                                                                 |                                                                                                                                                                                                  |                                                                          |                                                                                                                                                                     |
| <b>SHIGEMITSU 2015<sup>47</sup></b>                                                                                                                                               |                                                                                                                                                                                                  |                                                                          |                                                                                                                                                                     |
| <b>Population:</b> Postnatal women with severe pre-eclampsia, HELLP syndrome or placental abruption                                                                               |                                                                                                                                                                                                  |                                                                          |                                                                                                                                                                     |
| <b>Setting:</b> Tertiary referral (Japan)                                                                                                                                         |                                                                                                                                                                                                  |                                                                          |                                                                                                                                                                     |
| <b>Intervention:</b> Carperitide (no further details supplied)                                                                                                                    |                                                                                                                                                                                                  |                                                                          |                                                                                                                                                                     |
| <b>Comparison:</b> No intervention                                                                                                                                                |                                                                                                                                                                                                  |                                                                          |                                                                                                                                                                     |
| <b>Primary outcome</b>                                                                                                                                                            | <b>Treatment effect</b>                                                                                                                                                                          | <b>Number of participants</b>                                            | <b>Quality of the evidence</b>                                                                                                                                      |
| MAP                                                                                                                                                                               | Carperitide group had significantly improved MAP at 48 hours. Magnitude of difference not reported, no $p$ value presented.                                                                      | 16 (6 intervention, 10 control); follow-up complete for all participants | Retrospective cohort study; overall high risk of bias (comparability); conference abstract only, authors did not provide further data; small sample size ( $n<30$ ) |

**UTERINE CURETTAGE (8 studies)****SALVATORE 1967<sup>58</sup>****Population:** Postnatal women with severe pre-eclampsia or eclampsia**Setting:** Tertiary referral (Brazil)**Intervention:** Uterine curettage**Comparison:** No intervention

| Primary outcome                                     | Treatment effect                                                                                                                                            | Number of participants                                                    | Quality of the evidence                                                                                                                                                            |
|-----------------------------------------------------|-------------------------------------------------------------------------------------------------------------------------------------------------------------|---------------------------------------------------------------------------|------------------------------------------------------------------------------------------------------------------------------------------------------------------------------------|
| SBP + DBP (proportion achieving target <140/90mmHg) | 24 hours: curettage group 45%, usual care group 11%. No statistical analysis. 48 hours: curettage group 70%, usual care group 29%. No statistical analysis. | 48 (20 intervention, 28 control); follow-up complete for all participants | Prospective cohort study; overall high risk of bias (comparability); significant differences in study groups (9/20 intervention group eclamptic at enrolment, 28/28 control group) |

**MAGANN 1993<sup>59</sup>****Population:** Postnatal women with severe pre-eclampsia**Setting:** Tertiary referral (USA)**Intervention:** Uterine curettage**Comparison:** No intervention

| Primary outcome | Treatment effect                                                                                                         | Number of participants                                                    | Quality of the evidence                                      |
|-----------------|--------------------------------------------------------------------------------------------------------------------------|---------------------------------------------------------------------------|--------------------------------------------------------------|
| MAP             | Curettage group had significantly improved MAP to 24 hours after birth. Difference -6 to -10mmHg (16 hours $p<0.0002$ ). | 32 (16 intervention, 16 control); completeness of follow-up not specified | Open-label RCT; overall high risk of bias (multiple domains) |

**MAGANN 1994<sup>60</sup>****Population:** Postnatal women with severe pre-eclampsia**Setting:** Tertiary referral (USA)**Intervention:** Uterine curettage**Comparison:** Oral nifedipine OR no intervention

| Primary outcome | Treatment effect                                                                                                                                                | Number of participants                                                               | Quality of the evidence                                      |
|-----------------|-----------------------------------------------------------------------------------------------------------------------------------------------------------------|--------------------------------------------------------------------------------------|--------------------------------------------------------------|
| MAP             | Curettage group had significantly improved MAP 8-48 hours after birth. Difference -9 to -13mmHg ( $p=0.0017$ ). No difference between curettage and nifedipine. | 45 (15 intervention, 15 each control group); completeness of follow-up not specified | Open-label RCT; overall high risk of bias (multiple domains) |

**GOCMEN 1996<sup>57</sup>****Population:** Postnatal women with pre-eclampsia**Setting:** Tertiary referral (Turkey)**Intervention:** Uterine curettage**Comparison:** No intervention

| Primary outcome | Treatment effect                                                                                                           | Number of participants                                                    | Quality of the evidence                                                                                                                                    |
|-----------------|----------------------------------------------------------------------------------------------------------------------------|---------------------------------------------------------------------------|------------------------------------------------------------------------------------------------------------------------------------------------------------|
| MAP             | Curettage group had significantly improved MAP to 24 hours after birth. Magnitude of difference not reported ( $p=0.01$ ). | 50 (30 intervention, 20 control); completeness of follow-up not specified | Prospective cohort study; overall high risk of bias (comparability and outcome assessment); conference abstract only, authors did not provide further data |

**GOMEZ 2005<sup>61</sup>****Population:** Postnatal women with severe pre-eclampsia**Setting:** Tertiary referral (Peru)**Intervention:** Uterine curettage**Comparison:** No intervention

| Primary outcome | Treatment effect                                                                                                                 | Number of participants                                                    | Quality of the evidence                                                                                                      |
|-----------------|----------------------------------------------------------------------------------------------------------------------------------|---------------------------------------------------------------------------|------------------------------------------------------------------------------------------------------------------------------|
| MAP             | Intervention group had significantly improved MAP. Time point not specified. Magnitude of difference not reported ( $p<0.001$ ). | 86 (27 intervention, 59 control); completeness of follow-up not specified | Open-label RCT; overall high risk of bias (multiple domains); conference abstract only, authors did not provide further data |

**ALKAN 2006<sup>62</sup>****Population:** Postnatal women with severe pre-eclampsia**Setting:** Tertiary referral (Turkey)**Intervention:** Uterine curettage**Comparison:** No intervention

| Primary outcome | Treatment effect                                                                                       | Number of participants                                                   | Quality of the evidence                                      |
|-----------------|--------------------------------------------------------------------------------------------------------|--------------------------------------------------------------------------|--------------------------------------------------------------|
| MAP             | 24 hours: curettage group 103.4±7.8mmHg, usual care group 110.2±4.8. Difference -6.8mmHg ( $p<0.05$ ). | 56 (31 intervention, 25 control); follow-up complete for all participant | Open-label RCT; overall high risk of bias (multiple domains) |

|                                                                                              |                                                                                                                                                                                                                          |                                                                              |                                                                                                                                       |
|----------------------------------------------------------------------------------------------|--------------------------------------------------------------------------------------------------------------------------------------------------------------------------------------------------------------------------|------------------------------------------------------------------------------|---------------------------------------------------------------------------------------------------------------------------------------|
| <b>RAGAB 2013<sup>15</sup></b>                                                               |                                                                                                                                                                                                                          |                                                                              |                                                                                                                                       |
| <b>Population:</b> Postnatal women with severe pre-eclampsia or eclampsia                    |                                                                                                                                                                                                                          |                                                                              |                                                                                                                                       |
| <b>Setting:</b> Tertiary referral (Egypt)                                                    |                                                                                                                                                                                                                          |                                                                              |                                                                                                                                       |
| <b>Intervention:</b> Uterine curettage                                                       |                                                                                                                                                                                                                          |                                                                              |                                                                                                                                       |
| <b>Comparison:</b> No intervention                                                           |                                                                                                                                                                                                                          |                                                                              |                                                                                                                                       |
| <b>Primary outcome</b>                                                                       | <b>Treatment effect</b>                                                                                                                                                                                                  | <b>Number of participants</b>                                                | <b>Quality of the evidence</b>                                                                                                        |
| MAP                                                                                          | 6 hours: curettage group 140.1±6.12mmHg, usual care group 152.4±3.7mmHg. Difference -12.3mmHg ( $p=0.02$ ). 24 hours: curettage group 101.4±7.14mmHg, usual care group 110.6±2.22mmHg. Difference -9.2mmHg ( $p=0.01$ ). | 420 (220 intervention, 200 control); follow-up complete for all participants | Open-label RCT; overall high risk of bias (multiple domains)                                                                          |
| <b>MALLAPUR 2015<sup>18</sup></b>                                                            |                                                                                                                                                                                                                          |                                                                              |                                                                                                                                       |
| <b>Population:</b> Postnatal women with severe pre-eclampsia or eclampsia                    |                                                                                                                                                                                                                          |                                                                              |                                                                                                                                       |
| <b>Setting:</b> Tertiary referral (India)                                                    |                                                                                                                                                                                                                          |                                                                              |                                                                                                                                       |
| <b>Intervention:</b> Uterine curettage                                                       |                                                                                                                                                                                                                          |                                                                              |                                                                                                                                       |
| <b>Comparison:</b> No intervention                                                           |                                                                                                                                                                                                                          |                                                                              |                                                                                                                                       |
| <b>Primary outcome</b>                                                                       | <b>Treatment effect</b>                                                                                                                                                                                                  | <b>Number of participants</b>                                                | <b>Quality of the evidence</b>                                                                                                        |
| MAP                                                                                          | From 4 hours after birth: curettage group 116±4.4mmHg, usual care group 123.6±6.1mmHg. Difference -7.6mmHg ( $p<0.001$ ).                                                                                                | 100 (50 intervention, 50 control); completeness of follow-up not specified   | Open-label RCT; overall high risk of bias (multiple domains); conference abstract only, authors did not provide further data          |
| <b>ORGANISATION OF CARE (2 studies)</b>                                                      |                                                                                                                                                                                                                          |                                                                              |                                                                                                                                       |
| <b>YORK 1997<sup>26</sup></b>                                                                |                                                                                                                                                                                                                          |                                                                              |                                                                                                                                       |
| <b>Population:</b> Postnatal women with pre-eclampsia or essential hypertension, or diabetes |                                                                                                                                                                                                                          |                                                                              |                                                                                                                                       |
| <b>Setting:</b> Tertiary referral (USA)                                                      |                                                                                                                                                                                                                          |                                                                              |                                                                                                                                       |
| <b>Intervention:</b> Nurse specialist follow-up                                              |                                                                                                                                                                                                                          |                                                                              |                                                                                                                                       |
| <b>Comparison:</b> No intervention                                                           |                                                                                                                                                                                                                          |                                                                              |                                                                                                                                       |
| <b>Primary outcome</b>                                                                       | <b>Treatment effect</b>                                                                                                                                                                                                  | <b>Number of participants</b>                                                | <b>Quality of the evidence</b>                                                                                                        |
| Postnatal readmission to secondary care                                                      | No significant difference between groups.                                                                                                                                                                                | 96 (44 intervention, 52 control); completeness of follow-up not specified    | Open-label RCT; overall high risk of bias (multiple domains); population mixed diabetes and/or hypertension – unable to separate      |
| <b>BIBBO 2014<sup>33</sup></b>                                                               |                                                                                                                                                                                                                          |                                                                              |                                                                                                                                       |
| <b>Population:</b> Postnatal women with pre-eclampsia                                        |                                                                                                                                                                                                                          |                                                                              |                                                                                                                                       |
| <b>Setting:</b> Tertiary referral (USA)                                                      |                                                                                                                                                                                                                          |                                                                              |                                                                                                                                       |
| <b>Intervention:</b> Specialised postpartum clinic                                           |                                                                                                                                                                                                                          |                                                                              |                                                                                                                                       |
| <b>Comparison:</b> No intervention                                                           |                                                                                                                                                                                                                          |                                                                              |                                                                                                                                       |
| <b>Primary outcome</b>                                                                       | <b>Treatment effect</b>                                                                                                                                                                                                  | <b>Number of participants</b>                                                | <b>Quality of the evidence</b>                                                                                                        |
| Postnatal readmission to secondary care and triage visits                                    | Clinic group 21.7%, usual care group 8.7%. Difference 13% ( $p<0.039$ ).                                                                                                                                                 | 138 (69 intervention, 69 control); completeness of follow-up not specified.  | Retrospective cohort study; overall high risk of bias (comparability); conference abstract only, authors did not provide further data |

**Appendix S6: Risk of bias in included studies (n=38)****Appendix S6a: Risk of bias in included RCTs and quasi-randomised studies (n=31)**

| Study ID                            | Random sequence generation | Allocation concealment | Blinding of participants and personnel | Blinding of outcome assessment | Incomplete outcome data | Selective reporting | Other bias |
|-------------------------------------|----------------------------|------------------------|----------------------------------------|--------------------------------|-------------------------|---------------------|------------|
| <b>ANTIHYPERTENSIVE MEDICATIONS</b> |                            |                        |                                        |                                |                         |                     |            |
| Fidler 1982 <sup>42</sup>           | Unclear                    | Unclear                | Unclear                                | Unclear                        | High                    | High                | Low        |
| Garden 1982 <sup>24</sup>           | Unclear                    | Unclear                | Unclear                                | Unclear                        | Low                     | Unclear             | High       |
| Mabie 1987 <sup>22</sup>            | Unclear                    | Unclear                | High                                   | High                           | Low                     | Low                 | High       |
| Griffis 1989 <sup>38,39</sup>       | Unclear                    | Low                    | High                                   | High                           | High                    | High                | High       |
| Barton 1990 <sup>32</sup>           | Low                        | Low                    | Low                                    | Low                            | Low                     | Low                 | Low        |
| Walss Rodriguez 1991 <sup>40</sup>  | Low                        | Low                    | High                                   | High                           | Unclear                 | Unclear             | Low        |
| Vermillion 1999 <sup>21</sup>       | Low                        | Low                    | Low                                    | Low                            | Low                     | Low                 | High       |
| Begum 2002 <sup>17</sup>            | High                       | High                   | High                                   | High                           | Unclear                 | Unclear             | High       |
| Sayin 2005 <sup>34</sup>            | Unclear                    | Unclear                | High                                   | High                           | Low                     | Unclear             | High       |
| Hennessy 2007 <sup>23</sup>         | Unclear                    | Low                    | High                                   | High                           | Low                     | Low                 | High       |
| Vigil-de-Gracia 2007 <sup>35</sup>  | Low                        | Low                    | High                                   | High                           | Low                     | Low                 | Low        |
| Gaisin 2013 <sup>25</sup>           | Unclear                    | Unclear                | High                                   | High                           | Unclear                 | High                | High       |
| Gaisin 2014 <sup>37</sup>           | Unclear                    | Unclear                | High                                   | High                           | Unclear                 | Unclear             | High       |
| Noronha Neto 2016 <sup>29-31</sup>  | Low                        | Low                    | Low                                    | Unclear                        | Low                     | Low                 | Low        |
| Sharma 2017 <sup>27,28</sup>        | Low                        | Low                    | High                                   | High                           | Unclear                 | Low                 | Low        |
| <b>DIURETICS</b>                    |                            |                        |                                        |                                |                         |                     |            |
| Matthews 1997 <sup>46</sup>         | Unclear                    | Low                    | Low                                    | Low                            | Low                     | Unclear             | High       |
| Ascarelli 2005 <sup>16</sup>        | Unclear                    | Low                    | High                                   | High                           | Unclear                 | High                | Low        |
| Amorim 2015 <sup>45</sup>           | Low                        | Low                    | Low                                    | Low                            | Low                     | High                | Low        |
| Veena 2017 <sup>19</sup>            | Low                        | Low                    | High                                   | High                           | Unclear                 | Unclear             | Unclear    |
| <b>OTHER DRUGS</b>                  |                            |                        |                                        |                                |                         |                     |            |
| Weiner 1982 <sup>48</sup>           | Unclear                    | Unclear                | Low                                    | Low                            | Unclear                 | Unclear             | High       |
| Weiner 1984 <sup>49</sup>           | Low                        | Unclear                | Low                                    | Low                            | Low                     | Unclear             | High       |
| Montenegro 1985 <sup>50</sup>       | Unclear                    | Unclear                | Low                                    | Low                            | High                    | High                | High       |
| Barrilleaux 2005 <sup>53,54</sup>   | Low                        | Low                    | Low                                    | Low                            | Low                     | High                | High       |
| Hladunewich 2006 <sup>51</sup>      | Low                        | Low                    | Low                                    | Low                            | High                    | High                | High       |
| Liu 2009 <sup>52</sup>              | High                       | High                   | High                                   | High                           | High                    | Unclear             | High       |
| <b>UTERINE CURETTAGE</b>            |                            |                        |                                        |                                |                         |                     |            |
| Magann 1993 <sup>59</sup>           | Low                        | Low                    | High                                   | High                           | Unclear                 | Unclear             | Low        |
| Magann 1994 <sup>60</sup>           | Low                        | Unclear                | High                                   | High                           | Unclear                 | Unclear             | Low        |
| Gomez 2005 <sup>61</sup>            | Unclear                    | Unclear                | High                                   | High                           | Unclear                 | High                | Low        |
| Alkan 2006 <sup>62</sup>            | Unclear                    | Unclear                | High                                   | High                           | Low                     | High                | High       |
| Ragab 2013 <sup>15</sup>            | Low                        | Low                    | High                                   | High                           | Low                     | Low                 | Low        |
| Mallapur 2015 <sup>18</sup>         | Low                        | Unclear                | High                                   | High                           | Unclear                 | Unclear             | High       |
| <b>ORGANISATION OF CARE</b>         |                            |                        |                                        |                                |                         |                     |            |
| York 1997 <sup>26</sup>             | Unclear                    | Low                    | High                                   | High                           | Unclear                 | Unclear             | High       |

## Appendix S6b: Risk of bias in included cohort studies (n=7)

| Study ID                            | Selection                        |                                       |                                        |                                          | Comparability <sup>1</sup> | Outcome                 |                 |                              |
|-------------------------------------|----------------------------------|---------------------------------------|----------------------------------------|------------------------------------------|----------------------------|-------------------------|-----------------|------------------------------|
|                                     | Representative-ness <sup>2</sup> | Selection of non-exposed <sup>3</sup> | Ascertainment of exposure <sup>4</sup> | Outcome of interest not present at start |                            | Assessment <sup>5</sup> | F/U long enough | Adequacy of F/U <sup>6</sup> |
| <b>ANTIHYPERTENSIVE MEDICATIONS</b> |                                  |                                       |                                        |                                          |                            |                         |                 |                              |
| Krebs 1956 <sup>43 44</sup>         | Low (a)                          | Low (a)                               | Unclear (d)                            | Low (Yes)                                | Low (a)                    | High (b)                | Low (Yes)       | Unclear (d)                  |
| Palot 1979 <sup>36</sup>            | Unclear (d)                      | Low (a)                               | Unclear (d)                            | Low (Yes)                                | High (Neither)             | Unclear (d)             | Low (Yes)       | Unclear (d)                  |
| Shumard 2016 <sup>41</sup>          | Low (a)                          | Low (a)                               | Low (a)                                | Low (Yes)                                | High (Neither)             | Low (a)                 | Low (Yes)       | Low (a)                      |
| <b>OTHER DRUGS</b>                  |                                  |                                       |                                        |                                          |                            |                         |                 |                              |
| Shigemitsu 2015 <sup>47</sup>       | Unclear (d)                      | Unclear (c)                           | Low (a)                                | Low (Yes)                                | High (Neither)             | Low (a)                 | Low (Yes)       | Unclear (d)                  |
| <b>UTERINE CURETTAGE</b>            |                                  |                                       |                                        |                                          |                            |                         |                 |                              |
| Salvatore 1967 <sup>58</sup>        | High (b)                         | High (b)                              | Low (a)                                | Low (Yes)                                | High (Neither)             | Low (a)                 | Low (Yes)       | Low (a)                      |
| Gocmen 1996 <sup>57</sup>           | Unclear (d)                      | Unclear (c)                           | Unclear (d)                            | Low (Yes)                                | High (Neither)             | Unclear (d)             | High (No)       | Unclear (d)                  |
| <b>ORGANISATION OF CARE</b>         |                                  |                                       |                                        |                                          |                            |                         |                 |                              |
| Bibbo 2014 <sup>33</sup>            | Unclear (d)                      | Unclear (c)                           | Unclear (d)                            | Low (Yes)                                | High (Neither)             | Unclear (d)             | Low (Yes)       | Unclear (d)                  |

<sup>1</sup> (a) study controls for most important factor; (b) study controls for any additional factor

<sup>2</sup> (a) truly representative of the average in the community; (b) somewhat representative of the average in the community; (c) selected group of users e.g. nurses, volunteers; (d) no description of the derivation of the cohort

<sup>3</sup> (a) drawn from the same community as the exposed cohort; (b) drawn from a different source; (c) no description of the derivation of the non-exposed cohort

<sup>4</sup> (a) secure record (e.g. surgical record); (b) structured interview; (c) written self-report; (d) no description

<sup>5</sup> (a) independent blind assessment; (b) record linkage; (c) self-report; (d) no description

<sup>6</sup> (a) complete follow-up; (b) subjects lost to follow-up unlikely to introduce bias (>90% follow-up rate); (c) follow up rate <90% and no description of those lost; (d) no statement
