# Supplementary material for: Postpartum management of hypertensive disorders of pregnancy: a systematic review
Source: PubMed Central journal article supplement (PMC5719299; doi:10.1136/bmjopen-2017-018696), 2017-11-28
Supplement: bmjopen-2017-018696supp005.pdf [file bmjopen-2017-018696supp005.pdf]

## APPENDIX S5: Summary of main results for included studies (n=39)

| ANTIHYPERTENSIVE MEDICATIONS (18 studies)                                                                                                                                 |                                                                                                                                                                                                                       |                                                                                                                                         |                                                                                                                                                                                        |
|---------------------------------------------------------------------------------------------------------------------------------------------------------------------------|-----------------------------------------------------------------------------------------------------------------------------------------------------------------------------------------------------------------------|-----------------------------------------------------------------------------------------------------------------------------------------|----------------------------------------------------------------------------------------------------------------------------------------------------------------------------------------|
| <b>Calcium channel blockers</b>                                                                                                                                           |                                                                                                                                                                                                                       |                                                                                                                                         |                                                                                                                                                                                        |
| <b>BARTON 1990<sup>32</sup></b>                                                                                                                                           |                                                                                                                                                                                                                       |                                                                                                                                         |                                                                                                                                                                                        |
| <b>Population:</b> Postnatal women with severe pre-eclampsia                                                                                                              |                                                                                                                                                                                                                       |                                                                                                                                         |                                                                                                                                                                                        |
| <b>Setting:</b> Tertiary referral centres, USA                                                                                                                            |                                                                                                                                                                                                                       |                                                                                                                                         |                                                                                                                                                                                        |
| <b>Intervention:</b> Nifedipine 10mg PO 4-hourly for 48 hours                                                                                                             |                                                                                                                                                                                                                       |                                                                                                                                         |                                                                                                                                                                                        |
| <b>Comparison:</b> Placebo                                                                                                                                                |                                                                                                                                                                                                                       |                                                                                                                                         |                                                                                                                                                                                        |
| <b>Primary outcome</b><br>MAP (18-24 hours after birth)                                                                                                                   | <b>Treatment effect</b><br>Nifedipine group 93.9±1.6mmHg, placebo group 100.2±2.6mmHg. Difference -6.3mmHg ( $p<0.05$ ).                                                                                              | <b>Number of participants</b><br>31 (16 intervention, 15 control); follow-up complete for all participants                              | <b>Quality of the evidence</b><br>Double-blind RCT; overall low risk of bias                                                                                                           |
| <b>VERMILLION 1999<sup>21</sup></b>                                                                                                                                       |                                                                                                                                                                                                                       |                                                                                                                                         |                                                                                                                                                                                        |
| <b>Population:</b> Antenatal and postnatal women with severe pre-eclampsia or super-imposed pre-eclampsia                                                                 |                                                                                                                                                                                                                       |                                                                                                                                         |                                                                                                                                                                                        |
| <b>Setting:</b> Tertiary referral centres (USA)                                                                                                                           |                                                                                                                                                                                                                       |                                                                                                                                         |                                                                                                                                                                                        |
| <b>Intervention:</b> Nifedipine 10mg stat PO then 20mg every 20 minutes until BP <160/110mmHg or max 5 doses (90mg) + IV placebo                                          |                                                                                                                                                                                                                       |                                                                                                                                         |                                                                                                                                                                                        |
| <b>Comparison:</b> Labetalol 20mg, then 40mg, then 80mg IV every 20 minutes until BP <160/110mmHg or max 5 doses (300mg) + PO placebo                                     |                                                                                                                                                                                                                       |                                                                                                                                         |                                                                                                                                                                                        |
| <b>Primary outcome</b><br>SBP + DBP (time to target <160/100mmHg)                                                                                                         | <b>Treatment effect</b><br>Nifedipine group 25.1±13.6 minutes, labetalol group 43.6±25.4 minutes. Difference -18.5 minutes ( $p=0.002$ ).                                                                             | <b>Number of participants</b><br>50 (21 postnatal: 10 intervention, 11 control); follow-up complete for all participants                | <b>Quality of the evidence</b><br>Double-blind RCT; overall high risk of bias (other bias); small number of postnatal women (42%) (n<30); unable to obtain data for postnatal subgroup |
| <b>SAYIN 2005<sup>34</sup></b>                                                                                                                                            |                                                                                                                                                                                                                       |                                                                                                                                         |                                                                                                                                                                                        |
| <b>Population:</b> Postnatal women with pre-eclampsia, severe pre-eclampsia, superimposed pre-eclampsia or eclampsia                                                      |                                                                                                                                                                                                                       |                                                                                                                                         |                                                                                                                                                                                        |
| <b>Setting:</b> Tertiary referral centres (Turkey)                                                                                                                        |                                                                                                                                                                                                                       |                                                                                                                                         |                                                                                                                                                                                        |
| <b>Intervention:</b> Nifedipine 10mg PO 6-hourly until BP <150/100mmHg for 48 hours                                                                                       |                                                                                                                                                                                                                       |                                                                                                                                         |                                                                                                                                                                                        |
| <b>Comparison:</b> Methyldopa 250mg PO 8-hourly                                                                                                                           |                                                                                                                                                                                                                       |                                                                                                                                         |                                                                                                                                                                                        |
| <b>Primary outcome</b><br>SBP + DBP (time to target <150/100mmHg)                                                                                                         | <b>Treatment effect</b><br>Nifedipine group 6.7±2.5 days; methyldopa group 8.6±5.5 days. Difference -1.9 days (NS).                                                                                                   | <b>Number of participants</b><br>83 (42 intervention, 41 control); follow-up complete for all participants                              | <b>Quality of the evidence</b><br>Open-label RCT; overall high risk of bias (multiple domains)                                                                                         |
| <b>Vasodilators</b>                                                                                                                                                       |                                                                                                                                                                                                                       |                                                                                                                                         |                                                                                                                                                                                        |
| <b>PALOT 1979<sup>36</sup></b>                                                                                                                                            |                                                                                                                                                                                                                       |                                                                                                                                         |                                                                                                                                                                                        |
| <b>Population:</b> Postnatal women with 'arterial hypertensions of labour and the postpartum period'                                                                      |                                                                                                                                                                                                                       |                                                                                                                                         |                                                                                                                                                                                        |
| <b>Setting:</b> Not specified (France)                                                                                                                                    |                                                                                                                                                                                                                       |                                                                                                                                         |                                                                                                                                                                                        |
| <b>Intervention:</b> Hydralazine 5mg IV stat then 1% IV infusion, furosemide 20mg IV stat and 30% hypertonic glucose                                                      |                                                                                                                                                                                                                       |                                                                                                                                         |                                                                                                                                                                                        |
| <b>Comparison:</b> Clonidine IV and furosemide 20mg IV stat                                                                                                               |                                                                                                                                                                                                                       |                                                                                                                                         |                                                                                                                                                                                        |
| <b>Primary outcome</b><br>Maternal morbidity (development of pre-eclampsia with severe features)                                                                          | <b>Treatment effect</b><br>Hydralazine group: no women developed eclampsia, clonidine group: 2 women developed eclampsia. No statistical analysis.                                                                    | <b>Number of participants</b><br>54 (11 intervention, 24 control, 19 non-systematic treatment); completeness of follow-up not specified | <b>Quality of the evidence</b><br>Retrospective cohort study; overall high risk of bias (comparability); no statistical analysis                                                       |
| <b>GRIFFIS 1989<sup>38, 39</sup></b>                                                                                                                                      |                                                                                                                                                                                                                       |                                                                                                                                         |                                                                                                                                                                                        |
| <b>Population:</b> Postnatal women with pre-eclampsia                                                                                                                     |                                                                                                                                                                                                                       |                                                                                                                                         |                                                                                                                                                                                        |
| <b>Setting:</b> Tertiary referral centres (USA)                                                                                                                           |                                                                                                                                                                                                                       |                                                                                                                                         |                                                                                                                                                                                        |
| <b>Intervention:</b> Hydralazine 20mg IM 6-hourly for 24h                                                                                                                 |                                                                                                                                                                                                                       |                                                                                                                                         |                                                                                                                                                                                        |
| <b>Comparison:</b> Methyldopa 250mg IV 6-hourly for 24h                                                                                                                   |                                                                                                                                                                                                                       |                                                                                                                                         |                                                                                                                                                                                        |
| <b>Primary outcome</b><br>MAP (mean at 6 and 12 hours)                                                                                                                    | <b>Treatment effect</b><br>6 hours: hydralazine group 104.5mmHg, methyldopa group 112mmHg. Difference -7.5mmHg ( $p=0.0057$ ). 12 hours: hydralazine group 100mmHg, methyldopa group 108mmHg. Difference -8mmHg (NS). | <b>Number of participants</b><br>26 (12 intervention, 14 control); follow-up complete for all participants                              | <b>Quality of the evidence</b><br>Open-label RC; overall high risk of bias (multiple domains); small sample size (n<30)                                                                |
| <b>WALSS RODRIGUEZ 1991<sup>40</sup></b>                                                                                                                                  |                                                                                                                                                                                                                       |                                                                                                                                         |                                                                                                                                                                                        |
| <b>Population:</b> Postnatal women with severe pre-eclampsia                                                                                                              |                                                                                                                                                                                                                       |                                                                                                                                         |                                                                                                                                                                                        |
| <b>Setting:</b> Not specified (Mexico)                                                                                                                                    |                                                                                                                                                                                                                       |                                                                                                                                         |                                                                                                                                                                                        |
| <b>Intervention:</b> Hydralazine 40mg PO 6-hourly, duration not specified + if DBP >110mmHg PRN nifedipine 10mg sublingual every 30 minutes, to maximum of 3 doses (30mg) |                                                                                                                                                                                                                       |                                                                                                                                         |                                                                                                                                                                                        |
| <b>Comparison:</b> Nifedipine 10mg sublingual every 30 minutes if DBP ≥110mmHg                                                                                            |                                                                                                                                                                                                                       |                                                                                                                                         |                                                                                                                                                                                        |

|                                                                                                                                                       |                                                                                                                                                                         |                                                                                                                                 |                                                                                                                                                                                            |
|-------------------------------------------------------------------------------------------------------------------------------------------------------|-------------------------------------------------------------------------------------------------------------------------------------------------------------------------|---------------------------------------------------------------------------------------------------------------------------------|--------------------------------------------------------------------------------------------------------------------------------------------------------------------------------------------|
| <b>Primary outcome</b><br>SBP (mean)                                                                                                                  | <b>Treatment effect</b><br>Hydralazine group 143.6mmHg, nifedipine group 138.0mmHg. Difference 5.6mmHg (NS).                                                            | <b>Number of participants</b><br>38 (18 intervention, 20 control); completeness of follow-up not specified                      | <b>Quality of the evidence</b><br>Open-label RCT; overall high risk of bias (multiple domains)                                                                                             |
| <b>BEGUM 2002<sup>17</sup></b>                                                                                                                        |                                                                                                                                                                         |                                                                                                                                 |                                                                                                                                                                                            |
| <b>Population:</b> Antenatal and postnatal women with eclampsia                                                                                       |                                                                                                                                                                         |                                                                                                                                 |                                                                                                                                                                                            |
| <b>Setting:</b> Tertiary referral centres (Bangladesh)                                                                                                |                                                                                                                                                                         |                                                                                                                                 |                                                                                                                                                                                            |
| <b>Intervention:</b> Hydralazine 5mg then 2mg IV bolus every 15 minutes until DBP 90-95mmHg                                                           |                                                                                                                                                                         |                                                                                                                                 |                                                                                                                                                                                            |
| <b>Comparison:</b> Hydralazine 20mg /200ml normal saline IV infusion; 10 drops per min, increased by 5 drops at 15 min intervals; until DBP 90-95mmHg |                                                                                                                                                                         |                                                                                                                                 |                                                                                                                                                                                            |
| <b>Primary outcome</b><br>DBP (time to target 90-95mmHg)                                                                                              | <b>Treatment effect</b><br>Bolus hydralazine group 65.23±23.38 minutes, hydralazine infusion group 186.36±79.77 minutes. Difference -121.13 minutes ( <i>p</i> <0.001). | <b>Number of participants</b><br>77 (15 postnatal: 9 intervention, 6 control); completeness of follow-up not specified          | <b>Quality of the evidence</b><br>Open-label RCT; overall high risk of bias (multiple domains); small number of postnatal women (19%) (n<30): unable to obtain data for postnatal subgroup |
| <b>VIGIL DE GRACIA 2007<sup>35</sup></b>                                                                                                              |                                                                                                                                                                         |                                                                                                                                 |                                                                                                                                                                                            |
| <b>Population:</b> Postnatal women with severe gestational hypertension, severe pre-eclampsia or super-imposed pre-eclampsia                          |                                                                                                                                                                         |                                                                                                                                 |                                                                                                                                                                                            |
| <b>Setting:</b> Tertiary referral centres (Panama)                                                                                                    |                                                                                                                                                                         |                                                                                                                                 |                                                                                                                                                                                            |
| <b>Intervention:</b> Hydralazine 5mg IV every 20 minutes until BP <160/110mmHg or maximum 5 doses                                                     |                                                                                                                                                                         |                                                                                                                                 |                                                                                                                                                                                            |
| <b>Comparison:</b> Labetalol 20mg, then 40mg, then 80mg IV every 20 minutes until BP <160/110mmHg or maximum 5 doses (300mg)                          |                                                                                                                                                                         |                                                                                                                                 |                                                                                                                                                                                            |
| <b>Primary outcome</b><br>SBP + DBP (persistent hypertension >=160/110mmHg after 5 doses of medication)                                               | <b>Treatment effect</b><br>Hydralazine group 0/42, labetalol group 1/40 (NS).                                                                                           | <b>Number of participants</b><br>82 (42 intervention, 40 control); follow-up complete for all participants                      | <b>Quality of the evidence</b><br>Open-label RCT; overall high risk of bias (multiple domains)                                                                                             |
| <b>HENNESSY 2007<sup>23</sup></b>                                                                                                                     |                                                                                                                                                                         |                                                                                                                                 |                                                                                                                                                                                            |
| <b>Population:</b> Antenatal and postnatal women with pre-eclampsia, superimposed pre-eclampsia or essential hypertension                             |                                                                                                                                                                         |                                                                                                                                 |                                                                                                                                                                                            |
| <b>Setting:</b> Tertiary referral (Australia)                                                                                                         |                                                                                                                                                                         |                                                                                                                                 |                                                                                                                                                                                            |
| <b>Intervention:</b> Diazoxide 15mg IV every 3 minutes, until target BP (140/90mmHg) reached or maximum cumulative dose 300mg                         |                                                                                                                                                                         |                                                                                                                                 |                                                                                                                                                                                            |
| <b>Comparison:</b> Hydralazine 5mg IV every 20 minutes, until target BP (140/90mmHg) reached or maximum cumulative dose 15mg                          |                                                                                                                                                                         |                                                                                                                                 |                                                                                                                                                                                            |
| <b>Primary outcome</b><br>SBP + DBP (proportion achieving target BP <=140/90mmHg)                                                                     | <b>Treatment effect</b><br>Diazoxide group 67%, hydralazine group 43% ( <i>p</i> <0.01). RR 0.637 (95% CI 0.46 to 0.89) for not reaching target BP with intervention.   | <b>Number of participants</b><br>124 total (37 postnatal: 11 intervention, 16 control); follow-up complete for all participants | <b>Quality of the evidence</b><br>Open-label RCT; overall high risk of bias (multiple domains); small proportion of postnatal women (30%): unable to obtain data for postnatal subgroup    |
| <b>Beta-blockers</b>                                                                                                                                  |                                                                                                                                                                         |                                                                                                                                 |                                                                                                                                                                                            |
| <b>GARDEN 1982<sup>24</sup></b>                                                                                                                       |                                                                                                                                                                         |                                                                                                                                 |                                                                                                                                                                                            |
| <b>Population:</b> Antenatal and postnatal women with severe pre-eclampsia or eclampsia                                                               |                                                                                                                                                                         |                                                                                                                                 |                                                                                                                                                                                            |
| <b>Setting:</b> Tertiary referral (South Africa)                                                                                                      |                                                                                                                                                                         |                                                                                                                                 |                                                                                                                                                                                            |
| <b>Intervention:</b> Labetalol 200mg/200ml 5% dextrose, 20mg/h IV infusion, doubled every 30 minutes until DBP <100mmHg or maximum dose 160mg/hour    |                                                                                                                                                                         |                                                                                                                                 |                                                                                                                                                                                            |
| <b>Comparison:</b> Dihydralazine 100mg/200ml 5% dextrose, 10mg/h IV infusion, doubled every 30 minutes until DBP <100mmHg or maximum dose 80mg/hour   |                                                                                                                                                                         |                                                                                                                                 |                                                                                                                                                                                            |
| <b>Primary outcome</b><br>DBP (proportion achieving target DBP 90-100mHg within 2 hours)                                                              | <b>Treatment effect</b><br>Labetalol group 5/6, dihydralazine group 2/6. No statistical analysis.                                                                       | <b>Number of participants</b><br>12 total (6 postnatal: 3 intervention, 3 control); follow-up complete for all participants     | <b>Quality of the evidence</b><br>RCT (blinding not specified); overall high risk of bias (other bias); very small sample size (n<15): unable to obtain data for postnatal subgroup        |
| <b>FIDLER 1982<sup>42</sup></b>                                                                                                                       |                                                                                                                                                                         |                                                                                                                                 |                                                                                                                                                                                            |
| <b>Population:</b> Postnatal women with gestational hypertension                                                                                      |                                                                                                                                                                         |                                                                                                                                 |                                                                                                                                                                                            |
| <b>Setting:</b> Tertiary referral (UK)                                                                                                                |                                                                                                                                                                         |                                                                                                                                 |                                                                                                                                                                                            |
| <b>Intervention:</b> Timolol 5mg PO 8-hourly for 9 days                                                                                               |                                                                                                                                                                         |                                                                                                                                 |                                                                                                                                                                                            |
| <b>Comparison:</b> Methyldopa 250mg PO 8-hourly for 9 days                                                                                            |                                                                                                                                                                         |                                                                                                                                 |                                                                                                                                                                                            |
| <b>Primary outcome</b><br>DBP (day 1)                                                                                                                 | <b>Treatment effect</b><br>Timolol group 88.7mmHg, methyldopa group 93.8mmHg. Difference -5.1mmHg ( <i>p</i> <0.05).                                                    | <b>Number of participants</b><br>80 (40 intervention, 40 control); follow-up complete in 79/80 (99%)                            | <b>Quality of the evidence</b><br>RCT (blinding not specified); overall high risk of bias (multiple domains)                                                                               |
| <b>MABIE 1987<sup>22</sup></b>                                                                                                                        |                                                                                                                                                                         |                                                                                                                                 |                                                                                                                                                                                            |
| <b>Population:</b> Antenatal and postnatal women with pre-eclampsia, superimposed pre-eclampsia, eclampsia or essential hypertension                  |                                                                                                                                                                         |                                                                                                                                 |                                                                                                                                                                                            |
| <b>Setting:</b> Tertiary referral (USA)                                                                                                               |                                                                                                                                                                         |                                                                                                                                 |                                                                                                                                                                                            |
| <b>Intervention:</b> Labetalol 20mg IV every 10 minutes then escalating until DBP <100mmHg or maximum cumulative dose reached (300mg)                 |                                                                                                                                                                         |                                                                                                                                 |                                                                                                                                                                                            |
| <b>Comparison:</b> Hydralazine 5mg IV every 10 minutes until DBP <100mmHg                                                                             |                                                                                                                                                                         |                                                                                                                                 |                                                                                                                                                                                            |

|                                                                                                                         |                                                                                                                                  |                                                                                                                          |                                                                                                                                                                                                                 |
|-------------------------------------------------------------------------------------------------------------------------|----------------------------------------------------------------------------------------------------------------------------------|--------------------------------------------------------------------------------------------------------------------------|-----------------------------------------------------------------------------------------------------------------------------------------------------------------------------------------------------------------|
| <b>Primary outcome</b><br>MAP (mean maximal decrease)                                                                   | <b>Treatment effect</b><br>Labetalol group 25.5±11.2mmHg, hydralazine group 33.3±13.2mmHg. Difference -7.8mmHg ( $p=0.02$ ).     | <b>Number of participants</b><br>60 (41 postnatal: 27 intervention, 14 control); follow-up complete for all participants | <b>Quality of the evidence</b><br>Open-label RCT; overall high risk of bias (multiple domains)                                                                                                                  |
| <b>SHUMARD 2016</b> <sup>41</sup>                                                                                       |                                                                                                                                  |                                                                                                                          |                                                                                                                                                                                                                 |
| <b>Population:</b> Postnatal women with gestational hypertension or pre-eclampsia                                       |                                                                                                                                  |                                                                                                                          |                                                                                                                                                                                                                 |
| <b>Setting:</b> Not specified (USA)                                                                                     |                                                                                                                                  |                                                                                                                          |                                                                                                                                                                                                                 |
| <b>Intervention:</b> Labetalol PO (variable dose and frequency)                                                         |                                                                                                                                  |                                                                                                                          |                                                                                                                                                                                                                 |
| <b>Comparison:</b> Nifedipine PO (variable dose and frequency)                                                          |                                                                                                                                  |                                                                                                                          |                                                                                                                                                                                                                 |
| <b>Primary outcome</b><br>Length of hospital stay after delivery                                                        | <b>Treatment effect</b><br>Labetalol group 3.5 days, nifedipine group 3.6 days. Difference -0.1 days (NS).                       | <b>Number of participants</b><br>128 (42 intervention, 86 control); follow-up complete for all participants              | <b>Quality of the evidence</b><br>Retrospective cohort study; overall high risk of bias (comparability); conference abstract only, authors did not provide further data                                         |
| <b>SHARMA 2017</b> <sup>27 28</sup>                                                                                     |                                                                                                                                  |                                                                                                                          |                                                                                                                                                                                                                 |
| <b>Population:</b> Postnatal women with gestational hypertension or pre-eclampsia                                       |                                                                                                                                  |                                                                                                                          |                                                                                                                                                                                                                 |
| <b>Setting:</b> Tertiary referral (USA)                                                                                 |                                                                                                                                  |                                                                                                                          |                                                                                                                                                                                                                 |
| <b>Intervention:</b> Labetalol 200mg PO 12-hourly                                                                       |                                                                                                                                  |                                                                                                                          |                                                                                                                                                                                                                 |
| <b>Comparison:</b> Nifedipine XL 30mg PO once daily                                                                     |                                                                                                                                  |                                                                                                                          |                                                                                                                                                                                                                 |
| <b>Primary outcome</b><br>SBP + DBP (time to sustained BP control: absence of severe hypertension for $\geq 12$ hours)  | <b>Treatment effect</b><br>Labetalol group 37.6 hours, nifedipine group 38.2 hours. Difference -0.6 hours (NS).                  | <b>Number of participants</b><br>50 (25 intervention, 25 control); follow-up complete for all participants               | <b>Quality of the evidence</b><br>Open-label RCT; overall high risk of bias (multiple domains)                                                                                                                  |
| <b>Other antihypertensive medications</b>                                                                               |                                                                                                                                  |                                                                                                                          |                                                                                                                                                                                                                 |
| <b>GAISIN 2013</b> <sup>25</sup>                                                                                        |                                                                                                                                  |                                                                                                                          |                                                                                                                                                                                                                 |
| <b>Population:</b> Postnatal women with pre-eclampsia, super-imposed pre-eclampsia or essential hypertension            |                                                                                                                                  |                                                                                                                          |                                                                                                                                                                                                                 |
| <b>Setting:</b> Not specified (Russia)                                                                                  |                                                                                                                                  |                                                                                                                          |                                                                                                                                                                                                                 |
| <b>Intervention:</b> Indapamide 1.5mg PO OD, duration unclear                                                           |                                                                                                                                  |                                                                                                                          |                                                                                                                                                                                                                 |
| <b>Comparison:</b> Adjusted dose methyldopa                                                                             |                                                                                                                                  |                                                                                                                          |                                                                                                                                                                                                                 |
| <b>Primary outcome</b><br>SBP + DBP                                                                                     | <b>Treatment effect</b><br>Indapamide group 113±6/74±4mmHg, methyldopa group 116±5/75±4mmHg. Difference -3/+1mmHg (NS).          | <b>Number of participants</b><br>30 (15 intervention, 15 control); completeness of follow-up not specified               | <b>Quality of the evidence</b><br>Open-label RCT; overall high risk of bias (multiple domains); conference abstract only, authors did not provide further data                                                  |
| <b>GAISIN 2014</b> <sup>37</sup>                                                                                        |                                                                                                                                  |                                                                                                                          |                                                                                                                                                                                                                 |
| <b>Population:</b> Postnatal women with pre-eclampsia                                                                   |                                                                                                                                  |                                                                                                                          |                                                                                                                                                                                                                 |
| <b>Setting:</b> Not specified (Russia)                                                                                  |                                                                                                                                  |                                                                                                                          |                                                                                                                                                                                                                 |
| <b>Intervention:</b> Indapamide 1.5mg PO once daily + ursodeoxycholic acid 250mg PO three times daily, duration unclear |                                                                                                                                  |                                                                                                                          |                                                                                                                                                                                                                 |
| <b>Comparison:</b> Adjusted dose methyldopa                                                                             |                                                                                                                                  |                                                                                                                          |                                                                                                                                                                                                                 |
| <b>Primary outcome</b><br>SBP + DBP                                                                                     | <b>Treatment effect</b><br>Indapamide group 122±6/75±4 mmHg, methyldopa group 126±6/78±5mmHg. Difference -4/-3mmHg (NS).         | <b>Number of participants</b><br>30 (allocation not described); completeness of follow-up not specified                  | <b>Quality of the evidence</b><br>Open-label RCT; overall high risk of bias (multiple domains); conference abstract only, authors did not provide further data; number of participants in each group not stated |
| <b>KREBS 1956</b> <sup>43 44</sup>                                                                                      |                                                                                                                                  |                                                                                                                          |                                                                                                                                                                                                                 |
| <b>Population:</b> Postnatal women with gestational hypertension, pre-eclampsia, severe pre-eclampsia or eclampsia      |                                                                                                                                  |                                                                                                                          |                                                                                                                                                                                                                 |
| <b>Setting:</b> Not specified (Germany)                                                                                 |                                                                                                                                  |                                                                                                                          |                                                                                                                                                                                                                 |
| <b>Intervention:</b> Reserpine 0.25mg PO or intramuscular 6-8 hourly for 7 days                                         |                                                                                                                                  |                                                                                                                          |                                                                                                                                                                                                                 |
| <b>Comparison:</b> Phenobarbital                                                                                        |                                                                                                                                  |                                                                                                                          |                                                                                                                                                                                                                 |
| <b>Primary outcome</b><br>SBP + DBP (maximal reduction)                                                                 | <b>Treatment effect</b><br>Reserpine halved time to maximal BP reduction (no further details reported). No statistical analysis. | <b>Number of participants</b><br>140 (70 intervention, 70 control); completeness of follow-up not specified              | <b>Quality of the evidence</b><br>Retrospective cohort study; overall high risk of bias (selection and outcome assessment); no statistical analysis                                                             |
| <b>NORONHA NETO 2016</b> <sup>29-31</sup>                                                                               |                                                                                                                                  |                                                                                                                          |                                                                                                                                                                                                                 |
| <b>Population:</b> Postnatal women with severe HDP                                                                      |                                                                                                                                  |                                                                                                                          |                                                                                                                                                                                                                 |
| <b>Setting:</b> Tertiary referral (Brazil)                                                                              |                                                                                                                                  |                                                                                                                          |                                                                                                                                                                                                                 |
| <b>Intervention:</b> Clonidine 0.1mg PO repeated every 20 minutes to max 6 doses                                        |                                                                                                                                  |                                                                                                                          |                                                                                                                                                                                                                 |
| <b>Comparison:</b> Captopril 25mg PO repeated every 20 minutes to max 6 doses                                           |                                                                                                                                  |                                                                                                                          |                                                                                                                                                                                                                 |

|                                                                                                           |                                                                                                                                                                                                                                           |                                                                                                                |                                                                                                                                                                                                                 |
|-----------------------------------------------------------------------------------------------------------|-------------------------------------------------------------------------------------------------------------------------------------------------------------------------------------------------------------------------------------------|----------------------------------------------------------------------------------------------------------------|-----------------------------------------------------------------------------------------------------------------------------------------------------------------------------------------------------------------|
| <b>Primary outcome</b><br>SBP + DBP (episodes SBP $\geq$ 180mmHg and/or DBP $\geq$ 110mmHg)               | <b>Treatment effect</b><br>Clonidine group 2.1 $\pm$ 2.1 episodes, captopril group 3.5 $\pm$ 4.7 episodes. Difference -1.4 episodes (NS).                                                                                                 | <b>Number of participants</b><br>90 (45 intervention, 45 control); completeness of follow-up not specified     | <b>Quality of the evidence</b><br>Double-blind RCT; overall low risk of bias                                                                                                                                    |
| <b>DIURETICS (4 studies)</b>                                                                              |                                                                                                                                                                                                                                           |                                                                                                                |                                                                                                                                                                                                                 |
| <b>MATTHEWS 1997</b> <sup>46</sup>                                                                        |                                                                                                                                                                                                                                           |                                                                                                                |                                                                                                                                                                                                                 |
| <b>Population:</b> Postnatal women with severe pre-eclampsia or eclampsia                                 |                                                                                                                                                                                                                                           |                                                                                                                |                                                                                                                                                                                                                 |
| <b>Setting:</b> Tertiary referral centres (UK)                                                            |                                                                                                                                                                                                                                           |                                                                                                                |                                                                                                                                                                                                                 |
| <b>Intervention:</b> Furosemide 40mg PO once daily for 7 days                                             |                                                                                                                                                                                                                                           |                                                                                                                |                                                                                                                                                                                                                 |
| <b>Comparison:</b> Placebo                                                                                |                                                                                                                                                                                                                                           |                                                                                                                |                                                                                                                                                                                                                 |
| <b>Primary outcome</b><br>MAP (decrease)                                                                  | <b>Treatment effect</b><br>Intervention group -10.6mmHg, control group -9.75mmHg. Difference -0.85mmHg (NS).                                                                                                                              | <b>Number of participants</b><br>19 (10 intervention, 9 control); follow-up complete in 18/19 (95%)            | <b>Quality of the evidence</b><br>Double-blind RCT; overall high risk of bias (other bias); small sample size (n<30)                                                                                            |
| <b>ASCARELLI 2005</b> <sup>16</sup>                                                                       |                                                                                                                                                                                                                                           |                                                                                                                |                                                                                                                                                                                                                 |
| <b>Population:</b> Postnatal women with pre-eclampsia, severe pre-eclampsia or superimposed pre-eclampsia |                                                                                                                                                                                                                                           |                                                                                                                |                                                                                                                                                                                                                 |
| <b>Setting:</b> Tertiary referral centres (USA)                                                           |                                                                                                                                                                                                                                           |                                                                                                                |                                                                                                                                                                                                                 |
| <b>Intervention:</b> Furosemide 20mg PO once daily + potassium 20mEq PO once daily for 5 days             |                                                                                                                                                                                                                                           |                                                                                                                |                                                                                                                                                                                                                 |
| <b>Comparison:</b> No intervention                                                                        |                                                                                                                                                                                                                                           |                                                                                                                |                                                                                                                                                                                                                 |
| <b>Primary outcome</b><br>SBP                                                                             | <b>Treatment effect</b><br>No significant difference between groups (details not reported). Severe pre-eclampsia (n=70) day 2 SBP furosemide group 142 $\pm$ 13mmHg, usual care group 153 $\pm$ 19mmHg. Difference -11mmHg ( $p$ <0.004). | <b>Number of participants</b><br>264 (132 intervention, 132 control); completeness of follow-up not specified. | <b>Quality of the evidence</b><br>Open-label RCT; overall high risk of bias (multiple domains)                                                                                                                  |
| <b>AMORIM 2015</b> <sup>45</sup>                                                                          |                                                                                                                                                                                                                                           |                                                                                                                |                                                                                                                                                                                                                 |
| <b>Population:</b> Postnatal women with severe pre-eclampsia                                              |                                                                                                                                                                                                                                           |                                                                                                                |                                                                                                                                                                                                                 |
| <b>Setting:</b> Tertiary referral (Brazil)                                                                |                                                                                                                                                                                                                                           |                                                                                                                |                                                                                                                                                                                                                 |
| <b>Intervention:</b> Furosemide 40mg PO once daily for maximum 5 days                                     |                                                                                                                                                                                                                                           |                                                                                                                |                                                                                                                                                                                                                 |
| <b>Comparison:</b> Placebo                                                                                |                                                                                                                                                                                                                                           |                                                                                                                |                                                                                                                                                                                                                 |
| <b>Primary outcome</b><br>SBP + DBP                                                                       | <b>Treatment effect</b><br>Furosemide group had significantly improved SBP + DBP. Magnitude of difference not reported ( $p$ <0.001).                                                                                                     | <b>Number of participants</b><br>120 (allocation not described); follow-up complete in 118/120 (98%).          | <b>Quality of the evidence</b><br>Double-blind RCT; overall high risk of bias (reporting bias); conference abstract only, authors did not provide further data; number of participants in each group not stated |
| <b>VEENA 2017</b> <sup>19</sup>                                                                           |                                                                                                                                                                                                                                           |                                                                                                                |                                                                                                                                                                                                                 |
| <b>Population:</b> Postnatal women with severe pre-eclampsia                                              |                                                                                                                                                                                                                                           |                                                                                                                |                                                                                                                                                                                                                 |
| <b>Setting:</b> Tertiary referral centre (India)                                                          |                                                                                                                                                                                                                                           |                                                                                                                |                                                                                                                                                                                                                 |
| <b>Intervention:</b> Furosemide 10mg PO once daily plus nifedipine 10mg PO three times daily for 3 days   |                                                                                                                                                                                                                                           |                                                                                                                |                                                                                                                                                                                                                 |
| <b>Comparison:</b> Nifedipine 10mg PO three times daily for 3 days                                        |                                                                                                                                                                                                                                           |                                                                                                                |                                                                                                                                                                                                                 |
| <b>Primary outcome</b><br>SBP + DBP                                                                       | <b>Treatment effect</b><br>No significant difference between groups (absolute values and differences not reported, $p$ =0.457 for SBP and $p$ =0.642 for DBP).                                                                            | <b>Number of participants</b><br>100 (50 intervention, 50 control); follow-up complete in 98/100 (98%)         | <b>Quality of the evidence</b><br>Open-label RCT; overall high risk of bias (multiple domains)                                                                                                                  |
| <b>OTHER DRUGS (7 studies)</b>                                                                            |                                                                                                                                                                                                                                           |                                                                                                                |                                                                                                                                                                                                                 |
| <b>Selective 5-HT antagonists</b>                                                                         |                                                                                                                                                                                                                                           |                                                                                                                |                                                                                                                                                                                                                 |
| <b>WEINER 1982</b> <sup>48</sup>                                                                          |                                                                                                                                                                                                                                           |                                                                                                                |                                                                                                                                                                                                                 |
| <b>Population:</b> Postnatal women with severe pre-eclampsia                                              |                                                                                                                                                                                                                                           |                                                                                                                |                                                                                                                                                                                                                 |
| <b>Setting:</b> Tertiary referral (USA)                                                                   |                                                                                                                                                                                                                                           |                                                                                                                |                                                                                                                                                                                                                 |
| <b>Intervention:</b> R41468 IV (dose not specified) bolus then infusion for 90 minutes                    |                                                                                                                                                                                                                                           |                                                                                                                |                                                                                                                                                                                                                 |
| <b>Comparison:</b> Placebo                                                                                |                                                                                                                                                                                                                                           |                                                                                                                |                                                                                                                                                                                                                 |
| <b>Primary outcome</b><br>MAP (mean maximal decline)                                                      | <b>Treatment effect</b><br>SSRI group -31.6mmHg, placebo group -6.0mmHg. Difference -25.6mmHg ( $p$ <0.001).                                                                                                                              | <b>Number of participants</b><br>5 (crossover); follow-up complete in all participants                         | <b>Quality of the evidence</b><br>Double blind RCT (crossover); overall high risk of bias (other bias); conference abstract only, authors did not provide further data; very small sample size (n<15)           |

|                                                                                                                                                                                   |                                                                                                                                                                                                  |                                                                          |                                                                                                                                                                     |
|-----------------------------------------------------------------------------------------------------------------------------------------------------------------------------------|--------------------------------------------------------------------------------------------------------------------------------------------------------------------------------------------------|--------------------------------------------------------------------------|---------------------------------------------------------------------------------------------------------------------------------------------------------------------|
| <b>WEINER 1984<sup>49</sup></b>                                                                                                                                                   |                                                                                                                                                                                                  |                                                                          |                                                                                                                                                                     |
| <b>Population:</b> Postnatal women with pre-eclampsia and super-imposed pre-eclampsia                                                                                             |                                                                                                                                                                                                  |                                                                          |                                                                                                                                                                     |
| <b>Setting:</b> Tertiary referral (USA)                                                                                                                                           |                                                                                                                                                                                                  |                                                                          |                                                                                                                                                                     |
| <b>Intervention:</b> Ketanserin 10mg IV bolus then 4mg/hr IV infusion. Repeat bolus after 5 minutes if no response.                                                               |                                                                                                                                                                                                  |                                                                          |                                                                                                                                                                     |
| <b>Comparison:</b> Placebo                                                                                                                                                        |                                                                                                                                                                                                  |                                                                          |                                                                                                                                                                     |
| <b>Primary outcome</b>                                                                                                                                                            | <b>Treatment effect</b>                                                                                                                                                                          | <b>Number of participants</b>                                            | <b>Quality of the evidence</b>                                                                                                                                      |
| SBP + DBP (mean maximal decline)                                                                                                                                                  | SSRI group -41/-34mmHg, placebo group -7/-7mmHg. Difference -34/-27mmHg ( $p<0.001$ ).                                                                                                           | 20 (crossover); follow-up complete in all participants                   | Double blind RCT (crossover); overall high risk of bias (other bias); small sample size ( $n<30$ )                                                                  |
| <b>MONTENEGRO 1985<sup>50</sup></b>                                                                                                                                               |                                                                                                                                                                                                  |                                                                          |                                                                                                                                                                     |
| <b>Population:</b> Postnatal women with pre-eclampsia                                                                                                                             |                                                                                                                                                                                                  |                                                                          |                                                                                                                                                                     |
| <b>Setting:</b> Tertiary referral (USA)                                                                                                                                           |                                                                                                                                                                                                  |                                                                          |                                                                                                                                                                     |
| <b>Intervention:</b> Ketanserin 10mg IV bolus, repeated if no response. If no response to second bolus IV infusion 4mg/hr (increments of 2mg/hr every 10 minutes to max 12mg/hr). |                                                                                                                                                                                                  |                                                                          |                                                                                                                                                                     |
| <b>Comparison:</b> Placebo                                                                                                                                                        |                                                                                                                                                                                                  |                                                                          |                                                                                                                                                                     |
| <b>Primary outcome</b>                                                                                                                                                            | <b>Treatment effect</b>                                                                                                                                                                          | <b>Number of participants</b>                                            | <b>Quality of the evidence</b>                                                                                                                                      |
| MAP                                                                                                                                                                               | SSRI group had significantly improved MAP, over 30 minutes after drug administered. $F = 9.66$ ( $p<0.01$ )                                                                                      | 30 (crossover); follow-up complete in 23/30 (77%)                        | Double blind RCT (crossover); overall high risk of bias (multiple domains)                                                                                          |
| <b>Alternative therapies</b>                                                                                                                                                      |                                                                                                                                                                                                  |                                                                          |                                                                                                                                                                     |
| <b>HLADUNEWICH 2006<sup>51</sup></b>                                                                                                                                              |                                                                                                                                                                                                  |                                                                          |                                                                                                                                                                     |
| <b>Population:</b> Postnatal women with pre-eclampsia                                                                                                                             |                                                                                                                                                                                                  |                                                                          |                                                                                                                                                                     |
| <b>Setting:</b> Tertiary referral (USA)                                                                                                                                           |                                                                                                                                                                                                  |                                                                          |                                                                                                                                                                     |
| <b>Intervention:</b> L-arginine 3.5g PO four times daily OR L-arginine 10g IV three times daily (if unable to take PO) for 3-9 days postpartum                                    |                                                                                                                                                                                                  |                                                                          |                                                                                                                                                                     |
| <b>Comparison:</b> Placebo                                                                                                                                                        |                                                                                                                                                                                                  |                                                                          |                                                                                                                                                                     |
| <b>Primary outcome</b>                                                                                                                                                            | <b>Treatment effect</b>                                                                                                                                                                          | <b>Number of participants</b>                                            | <b>Quality of the evidence</b>                                                                                                                                      |
| MAP                                                                                                                                                                               | Day 3: L-arginine group $102\pm 12$ mmHg, placebo group $103\pm 12$ mmHg. Difference -1mmHg (NS). Day 10: L-arginine group $98\pm 14$ mmHg, placebo group $96\pm 1$ mmHg. Difference 2mmHg (NS). | 45 (22 intervention, 23 control); follow-up complete in 39/45 (87%)      | Double blind RCT; overall high risk of bias (multiple domains)                                                                                                      |
| <b>LIU 2009<sup>52</sup></b>                                                                                                                                                      |                                                                                                                                                                                                  |                                                                          |                                                                                                                                                                     |
| <b>Population:</b> Postnatal women with severe pre-eclampsia                                                                                                                      |                                                                                                                                                                                                  |                                                                          |                                                                                                                                                                     |
| <b>Setting:</b> District general (China)                                                                                                                                          |                                                                                                                                                                                                  |                                                                          |                                                                                                                                                                     |
| <b>Intervention:</b> Shengkangbao 10g PO or IV twice daily for 3 weeks                                                                                                            |                                                                                                                                                                                                  |                                                                          |                                                                                                                                                                     |
| <b>Comparison:</b> No intervention                                                                                                                                                |                                                                                                                                                                                                  |                                                                          |                                                                                                                                                                     |
| <b>Primary outcome</b>                                                                                                                                                            | <b>Treatment effect</b>                                                                                                                                                                          | <b>Number of participants</b>                                            | <b>Quality of the evidence</b>                                                                                                                                      |
| Percentage of cases with positive albuminuria                                                                                                                                     | 3 weeks: shengkangbao group $0.7\pm 0.8\%$ positive albuminuria, usual care group $1.5\pm 0.9\%$ . Difference $-0.8\%$ ( $p<0.01$ ).                                                             | 77 (allocation not described); follow-up complete in 72/77 (94%)         | Open-label quasi-randomised study; overall high risk of bias (multiple domains)                                                                                     |
| <b>Steroids</b>                                                                                                                                                                   |                                                                                                                                                                                                  |                                                                          |                                                                                                                                                                     |
| <b>BARRILLEAUX 2005<sup>53,54</sup></b>                                                                                                                                           |                                                                                                                                                                                                  |                                                                          |                                                                                                                                                                     |
| <b>Population:</b> Postnatal women with severe pre-eclampsia and eclampsia                                                                                                        |                                                                                                                                                                                                  |                                                                          |                                                                                                                                                                     |
| <b>Setting:</b> Tertiary referral (USA)                                                                                                                                           |                                                                                                                                                                                                  |                                                                          |                                                                                                                                                                     |
| <b>Intervention:</b> Dexamethasone 10mg x2, then 5mg x 2 IV 12-hourly for 48 hours                                                                                                |                                                                                                                                                                                                  |                                                                          |                                                                                                                                                                     |
| <b>Comparison:</b> Placebo (IV saline)                                                                                                                                            |                                                                                                                                                                                                  |                                                                          |                                                                                                                                                                     |
| <b>Primary outcome</b>                                                                                                                                                            | <b>Treatment effect</b>                                                                                                                                                                          | <b>Number of participants</b>                                            | <b>Quality of the evidence</b>                                                                                                                                      |
| Antihypertensive medication requirement                                                                                                                                           | Dexamethasone group 38/77 (49%), placebo group 31/80 (39%) required antihypertensive treatment in the first 48h PN. Difference 10% (NS).                                                         | 157 (77 intervention, 80 control); follow-up complete in 155/157 (99%)   | Double blind RCT; overall high risk of bias (reporting bias)                                                                                                        |
| <b>Atrial natriuretic peptide</b>                                                                                                                                                 |                                                                                                                                                                                                  |                                                                          |                                                                                                                                                                     |
| <b>SHIGEMITSU 2015<sup>47</sup></b>                                                                                                                                               |                                                                                                                                                                                                  |                                                                          |                                                                                                                                                                     |
| <b>Population:</b> Postnatal women with severe pre-eclampsia, HELLP syndrome or placental abruption                                                                               |                                                                                                                                                                                                  |                                                                          |                                                                                                                                                                     |
| <b>Setting:</b> Tertiary referral (Japan)                                                                                                                                         |                                                                                                                                                                                                  |                                                                          |                                                                                                                                                                     |
| <b>Intervention:</b> Carperitide (no further details supplied)                                                                                                                    |                                                                                                                                                                                                  |                                                                          |                                                                                                                                                                     |
| <b>Comparison:</b> No intervention                                                                                                                                                |                                                                                                                                                                                                  |                                                                          |                                                                                                                                                                     |
| <b>Primary outcome</b>                                                                                                                                                            | <b>Treatment effect</b>                                                                                                                                                                          | <b>Number of participants</b>                                            | <b>Quality of the evidence</b>                                                                                                                                      |
| MAP                                                                                                                                                                               | Carperitide group had significantly improved MAP at 48 hours. Magnitude of difference not reported, no $p$ value presented.                                                                      | 16 (6 intervention, 10 control); follow-up complete for all participants | Retrospective cohort study; overall high risk of bias (comparability); conference abstract only, authors did not provide further data; small sample size ( $n<30$ ) |

**UTERINE CURETTAGE (8 studies)****SALVATORE 1967<sup>58</sup>****Population:** Postnatal women with severe pre-eclampsia or eclampsia**Setting:** Tertiary referral (Brazil)**Intervention:** Uterine curettage**Comparison:** No intervention

| <b>Primary outcome</b>                              | <b>Treatment effect</b>                                                                                                                                     | <b>Number of participants</b>                                             | <b>Quality of the evidence</b>                                                                                                                                                     |
|-----------------------------------------------------|-------------------------------------------------------------------------------------------------------------------------------------------------------------|---------------------------------------------------------------------------|------------------------------------------------------------------------------------------------------------------------------------------------------------------------------------|
| SBP + DBP (proportion achieving target <140/90mmHg) | 24 hours: curettage group 45%, usual care group 11%. No statistical analysis. 48 hours: curettage group 70%, usual care group 29%. No statistical analysis. | 48 (20 intervention, 28 control); follow-up complete for all participants | Prospective cohort study; overall high risk of bias (comparability); significant differences in study groups (9/20 intervention group eclamptic at enrolment, 28/28 control group) |

**MAGANN 1993<sup>59</sup>****Population:** Postnatal women with severe pre-eclampsia**Setting:** Tertiary referral (USA)**Intervention:** Uterine curettage**Comparison:** No intervention

| <b>Primary outcome</b> | <b>Treatment effect</b>                                                                                                  | <b>Number of participants</b>                                             | <b>Quality of the evidence</b>                               |
|------------------------|--------------------------------------------------------------------------------------------------------------------------|---------------------------------------------------------------------------|--------------------------------------------------------------|
| MAP                    | Curettage group had significantly improved MAP to 24 hours after birth. Difference -6 to -10mmHg (16 hours $p<0.0002$ ). | 32 (16 intervention, 16 control); completeness of follow-up not specified | Open-label RCT; overall high risk of bias (multiple domains) |

**MAGANN 1994<sup>60</sup>****Population:** Postnatal women with severe pre-eclampsia**Setting:** Tertiary referral (USA)**Intervention:** Uterine curettage**Comparison:** Oral nifedipine OR no intervention

| <b>Primary outcome</b> | <b>Treatment effect</b>                                                                                                                                         | <b>Number of participants</b>                                                        | <b>Quality of the evidence</b>                               |
|------------------------|-----------------------------------------------------------------------------------------------------------------------------------------------------------------|--------------------------------------------------------------------------------------|--------------------------------------------------------------|
| MAP                    | Curettage group had significantly improved MAP 8-48 hours after birth. Difference -9 to -13mmHg ( $p=0.0017$ ). No difference between curettage and nifedipine. | 45 (15 intervention, 15 each control group); completeness of follow-up not specified | Open-label RCT; overall high risk of bias (multiple domains) |

**GOCMEN 1996<sup>57</sup>****Population:** Postnatal women with pre-eclampsia**Setting:** Tertiary referral (Turkey)**Intervention:** Uterine curettage**Comparison:** No intervention

| <b>Primary outcome</b> | <b>Treatment effect</b>                                                                                                    | <b>Number of participants</b>                                             | <b>Quality of the evidence</b>                                                                                                                             |
|------------------------|----------------------------------------------------------------------------------------------------------------------------|---------------------------------------------------------------------------|------------------------------------------------------------------------------------------------------------------------------------------------------------|
| MAP                    | Curettage group had significantly improved MAP to 24 hours after birth. Magnitude of difference not reported ( $p=0.01$ ). | 50 (30 intervention, 20 control); completeness of follow-up not specified | Prospective cohort study; overall high risk of bias (comparability and outcome assessment); conference abstract only, authors did not provide further data |

**GOMEZ 2005<sup>61</sup>****Population:** Postnatal women with severe pre-eclampsia**Setting:** Tertiary referral (Peru)**Intervention:** Uterine curettage**Comparison:** No intervention

| <b>Primary outcome</b> | <b>Treatment effect</b>                                                                                                          | <b>Number of participants</b>                                             | <b>Quality of the evidence</b>                                                                                               |
|------------------------|----------------------------------------------------------------------------------------------------------------------------------|---------------------------------------------------------------------------|------------------------------------------------------------------------------------------------------------------------------|
| MAP                    | Intervention group had significantly improved MAP. Time point not specified. Magnitude of difference not reported ( $p<0.001$ ). | 86 (27 intervention, 59 control); completeness of follow-up not specified | Open-label RCT; overall high risk of bias (multiple domains); conference abstract only, authors did not provide further data |

**ALKAN 2006<sup>62</sup>****Population:** Postnatal women with severe pre-eclampsia**Setting:** Tertiary referral (Turkey)**Intervention:** Uterine curettage**Comparison:** No intervention

| <b>Primary outcome</b> | <b>Treatment effect</b>                                                                                | <b>Number of participants</b>                                            | <b>Quality of the evidence</b>                               |
|------------------------|--------------------------------------------------------------------------------------------------------|--------------------------------------------------------------------------|--------------------------------------------------------------|
| MAP                    | 24 hours: curettage group 103.4±7.8mmHg, usual care group 110.2±4.8. Difference -6.8mmHg ( $p<0.05$ ). | 56 (31 intervention, 25 control); follow-up complete for all participant | Open-label RCT; overall high risk of bias (multiple domains) |

**RAGAB 2013<sup>15</sup>****Population:** Postnatal women with severe pre-eclampsia or eclampsia**Setting:** Tertiary referral (Egypt)**Intervention:** Uterine curettage**Comparison:** No intervention

| Primary outcome | Treatment effect                                                                                                                                                                                                         | Number of participants                                                       | Quality of the evidence                                      |
|-----------------|--------------------------------------------------------------------------------------------------------------------------------------------------------------------------------------------------------------------------|------------------------------------------------------------------------------|--------------------------------------------------------------|
| MAP             | 6 hours: curettage group 140.1±6.12mmHg, usual care group 152.4±3.7mmHg. Difference -12.3mmHg ( $p=0.02$ ). 24 hours: curettage group 101.4±7.14mmHg, usual care group 110.6±2.22mmHg. Difference -9.2mmHg ( $p=0.01$ ). | 420 (220 intervention, 200 control); follow-up complete for all participants | Open-label RCT; overall high risk of bias (multiple domains) |

**MALLAPUR 2015<sup>18</sup>****Population:** Postnatal women with severe pre-eclampsia or eclampsia**Setting:** Tertiary referral (India)**Intervention:** Uterine curettage**Comparison:** No intervention

| Primary outcome | Treatment effect                                                                                                          | Number of participants                                                     | Quality of the evidence                                                                                                      |
|-----------------|---------------------------------------------------------------------------------------------------------------------------|----------------------------------------------------------------------------|------------------------------------------------------------------------------------------------------------------------------|
| MAP             | From 4 hours after birth: curettage group 116±4.4mmHg, usual care group 123.6±6.1mmHg. Difference -7.6mmHg ( $p<0.001$ ). | 100 (50 intervention, 50 control); completeness of follow-up not specified | Open-label RCT; overall high risk of bias (multiple domains); conference abstract only, authors did not provide further data |

**ORGANISATION OF CARE (2 studies)****YORK 1997<sup>26</sup>****Population:** Postnatal women with pre-eclampsia or essential hypertension, or diabetes**Setting:** Tertiary referral (USA)**Intervention:** Nurse specialist follow-up**Comparison:** No intervention

| Primary outcome                         | Treatment effect                          | Number of participants                                                    | Quality of the evidence                                                                                                          |
|-----------------------------------------|-------------------------------------------|---------------------------------------------------------------------------|----------------------------------------------------------------------------------------------------------------------------------|
| Postnatal readmission to secondary care | No significant difference between groups. | 96 (44 intervention, 52 control); completeness of follow-up not specified | Open-label RCT; overall high risk of bias (multiple domains); population mixed diabetes and/or hypertension – unable to separate |

**BIBBO 2014<sup>33</sup>****Population:** Postnatal women with pre-eclampsia**Setting:** Tertiary referral (USA)**Intervention:** Specialised postpartum clinic**Comparison:** No intervention

| Primary outcome                                           | Treatment effect                                                         | Number of participants                                                      | Quality of the evidence                                                                                                               |
|-----------------------------------------------------------|--------------------------------------------------------------------------|-----------------------------------------------------------------------------|---------------------------------------------------------------------------------------------------------------------------------------|
| Postnatal readmission to secondary care and triage visits | Clinic group 21.7%, usual care group 8.7%. Difference 13% ( $p<0.039$ ). | 138 (69 intervention, 69 control); completeness of follow-up not specified. | Retrospective cohort study; overall high risk of bias (comparability); conference abstract only, authors did not provide further data |
