# Supplementary material for: Postpartum management of hypertensive disorders of pregnancy: a systematic review
Source: PubMed Central journal article supplement (PMC5719299; doi:10.1136/bmjopen-2017-018696), 2017-11-28
Supplement: bmjopen-2017-018696supp006.pdf [file bmjopen-2017-018696supp006.pdf]

## **Appendix S6: Risk of bias in included studies (n=38)**

### **Appendix S6a: Risk of bias in included RCTs and quasi-randomised studies (n=31)**

| <b>Study ID</b>                     | <b>Random sequence generation</b> | <b>Allocation concealment</b> | <b>Blinding of participants and personnel</b> | <b>Blinding of outcome assessment</b> | <b>Incomplete outcome data</b> | <b>Selective reporting</b> | <b>Other bias</b> |
|-------------------------------------|-----------------------------------|-------------------------------|-----------------------------------------------|---------------------------------------|--------------------------------|----------------------------|-------------------|
| <b>ANTIHYPERTENSIVE MEDICATIONS</b> |                                   |                               |                                               |                                       |                                |                            |                   |
| Fidler 1982 <sup>42</sup>           | Unclear                           | Unclear                       | Unclear                                       | Unclear                               | High                           | High                       | Low               |
| Garden 1982 <sup>24</sup>           | Unclear                           | Unclear                       | Unclear                                       | Unclear                               | Low                            | Unclear                    | High              |
| Mabie 1987 <sup>22</sup>            | Unclear                           | Unclear                       | High                                          | High                                  | Low                            | Low                        | High              |
| Griffis 1989 <sup>38,39</sup>       | Unclear                           | Low                           | High                                          | High                                  | High                           | High                       | High              |
| Barton 1990 <sup>32</sup>           | Low                               | Low                           | Low                                           | Low                                   | Low                            | Low                        | Low               |
| Walss Rodriguez 1991 <sup>40</sup>  | Low                               | Low                           | High                                          | High                                  | Unclear                        | Unclear                    | Low               |
| Vermillion 1999 <sup>21</sup>       | Low                               | Low                           | Low                                           | Low                                   | Low                            | Low                        | High              |
| Begum 2002 <sup>17</sup>            | High                              | High                          | High                                          | High                                  | Unclear                        | Unclear                    | High              |
| Sayin 2005 <sup>34</sup>            | Unclear                           | Unclear                       | High                                          | High                                  | Low                            | Unclear                    | High              |
| Hennessy 2007 <sup>23</sup>         | Unclear                           | Low                           | High                                          | High                                  | Low                            | Low                        | High              |
| Vigil-de-Gracia 2007 <sup>35</sup>  | Low                               | Low                           | High                                          | High                                  | Low                            | Low                        | Low               |
| Gaisin 2013 <sup>25</sup>           | Unclear                           | Unclear                       | High                                          | High                                  | Unclear                        | High                       | High              |
| Gaisin 2014 <sup>37</sup>           | Unclear                           | Unclear                       | High                                          | High                                  | Unclear                        | Unclear                    | High              |
| Noronha Neto 2016 <sup>29-31</sup>  | Low                               | Low                           | Low                                           | Unclear                               | Low                            | Low                        | Low               |
| Sharma 2017 <sup>27,28</sup>        | Low                               | Low                           | High                                          | High                                  | Unclear                        | Low                        | Low               |
| <b>DIURETICS</b>                    |                                   |                               |                                               |                                       |                                |                            |                   |
| Matthews 1997 <sup>46</sup>         | Unclear                           | Low                           | Low                                           | Low                                   | Low                            | Unclear                    | High              |
| Ascarelli 2005 <sup>16</sup>        | Unclear                           | Low                           | High                                          | High                                  | Unclear                        | High                       | Low               |
| Amorim 2015 <sup>45</sup>           | Low                               | Low                           | Low                                           | Low                                   | Low                            | High                       | Low               |
| Veena 2017 <sup>19</sup>            | Low                               | Low                           | High                                          | High                                  | Unclear                        | Unclear                    | Unclear           |
| <b>OTHER DRUGS</b>                  |                                   |                               |                                               |                                       |                                |                            |                   |
| Weiner 1982 <sup>48</sup>           | Unclear                           | Unclear                       | Low                                           | Low                                   | Unclear                        | Unclear                    | High              |
| Weiner 1984 <sup>49</sup>           | Low                               | Unclear                       | Low                                           | Low                                   | Low                            | Unclear                    | High              |
| Montenegro 1985 <sup>50</sup>       | Unclear                           | Unclear                       | Low                                           | Low                                   | High                           | High                       | High              |
| Barrilleaux 2005 <sup>53,54</sup>   | Low                               | Low                           | Low                                           | Low                                   | Low                            | High                       | High              |
| Hladunewich 2006 <sup>51</sup>      | Low                               | Low                           | Low                                           | Low                                   | High                           | High                       | High              |
| Liu 2009 <sup>52</sup>              | High                              | High                          | High                                          | High                                  | High                           | Unclear                    | High              |
| <b>UTERINE CURETTAGE</b>            |                                   |                               |                                               |                                       |                                |                            |                   |
| Magann 1993 <sup>59</sup>           | Low                               | Low                           | High                                          | High                                  | Unclear                        | Unclear                    | Low               |
| Magann 1994 <sup>60</sup>           | Low                               | Unclear                       | High                                          | High                                  | Unclear                        | Unclear                    | Low               |
| Gomez 2005 <sup>61</sup>            | Unclear                           | Unclear                       | High                                          | High                                  | Unclear                        | High                       | Low               |
| Alkan 2006 <sup>62</sup>            | Unclear                           | Unclear                       | High                                          | High                                  | Low                            | High                       | High              |
| Ragab 2013 <sup>15</sup>            | Low                               | Low                           | High                                          | High                                  | Low                            | Low                        | Low               |
| Mallapur 2015 <sup>18</sup>         | Low                               | Unclear                       | High                                          | High                                  | Unclear                        | Unclear                    | High              |
| <b>ORGANISATION OF CARE</b>         |                                   |                               |                                               |                                       |                                |                            |                   |
| York 1997 <sup>26</sup>             | Unclear                           | Low                           | High                                          | High                                  | Unclear                        | Unclear                    | High              |

## Appendix S6b: Risk of bias in included cohort studies (n=7)

| Study ID                            | Selection                        |                                       |                                        |                                          | Comparability <sup>1</sup> | Outcome                 |                 |                              |
|-------------------------------------|----------------------------------|---------------------------------------|----------------------------------------|------------------------------------------|----------------------------|-------------------------|-----------------|------------------------------|
|                                     | Representative-ness <sup>2</sup> | Selection of non-exposed <sup>3</sup> | Ascertainment of exposure <sup>4</sup> | Outcome of interest not present at start |                            | Assessment <sup>5</sup> | F/U long enough | Adequacy of F/U <sup>6</sup> |
| <b>ANTIHYPERTENSIVE MEDICATIONS</b> |                                  |                                       |                                        |                                          |                            |                         |                 |                              |
| Krebs 1956 <sup>43 44</sup>         | Low (a)                          | Low (a)                               | Unclear (d)                            | Low (Yes)                                | Low (a)                    | High (b)                | Low (Yes)       | Unclear (d)                  |
| Palot 1979 <sup>36</sup>            | Unclear (d)                      | Low (a)                               | Unclear (d)                            | Low (Yes)                                | High (Neither)             | Unclear (d)             | Low (Yes)       | Unclear (d)                  |
| Shumard 2016 <sup>41</sup>          | Low (a)                          | Low (a)                               | Low (a)                                | Low (Yes)                                | High (Neither)             | Low (a)                 | Low (Yes)       | Low (a)                      |
| <b>OTHER DRUGS</b>                  |                                  |                                       |                                        |                                          |                            |                         |                 |                              |
| Shigemitsu 2015 <sup>47</sup>       | Unclear (d)                      | Unclear (c)                           | Low (a)                                | Low (Yes)                                | High (Neither)             | Low (a)                 | Low (Yes)       | Unclear (d)                  |
| <b>UTERINE CURETTAGE</b>            |                                  |                                       |                                        |                                          |                            |                         |                 |                              |
| Salvatore 1967 <sup>58</sup>        | High (b)                         | High (b)                              | Low (a)                                | Low (Yes)                                | High (Neither)             | Low (a)                 | Low (Yes)       | Low (a)                      |
| Gocmen 1996 <sup>57</sup>           | Unclear (d)                      | Unclear (c)                           | Unclear (d)                            | Low (Yes)                                | High (Neither)             | Unclear (d)             | High (No)       | Unclear (d)                  |
| <b>ORGANISATION OF CARE</b>         |                                  |                                       |                                        |                                          |                            |                         |                 |                              |
| Bibbo 2014 <sup>33</sup>            | Unclear (d)                      | Unclear (c)                           | Unclear (d)                            | Low (Yes)                                | High (Neither)             | Unclear (d)             | Low (Yes)       | Unclear (d)                  |

<sup>1</sup> (a) study controls for most important factor; (b) study controls for any additional factor

<sup>2</sup> (a) truly representative of the average in the community; (b) somewhat representative of the average in the community; (c) selected group of users e.g. nurses, volunteers; (d) no description of the derivation of the cohort

<sup>3</sup> (a) drawn from the same community as the exposed cohort; (b) drawn from a different source; (c) no description of the derivation of the non-exposed cohort

<sup>4</sup> (a) secure record (e.g. surgical record); (b) structured interview; (c) written self-report; (d) no description

<sup>5</sup> (a) independent blind assessment; (b) record linkage; (c) self-report; (d) no description

<sup>6</sup> (a) complete follow-up; (b) subjects lost to follow-up unlikely to introduce bias (>90% follow-up rate); (c) follow up rate <90% and no description of those lost; (d) no statement
